# Supplementary material for: Differential Gene Profiling of the Heartwood Formation Process in Taiwania cryptomerioides Hayata Xylem Tissues
Source: MDPI journal article supplement (doi:10.3390/ijms21030960), 2020-01-31
Supplement: s1 [file s1]

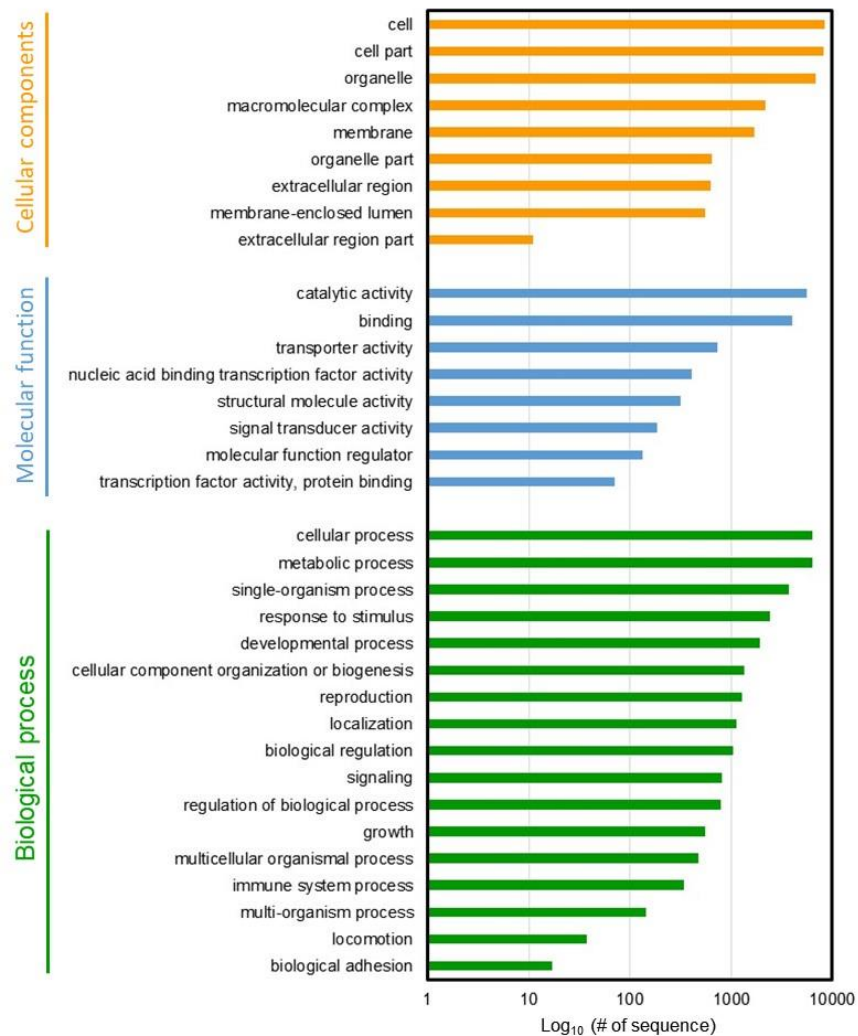

**Figure S1.** Functional annotation of the longest unigene collection based on gene ontology (GO) categorization.





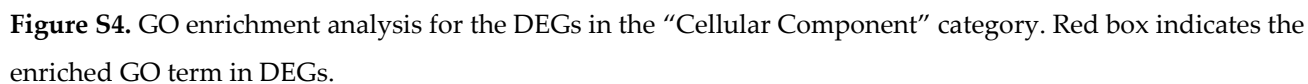

**Figure S4.** GO enrichment analysis for the DEGs in the “Cellular Component” category. Red box indicates the enriched GO term in DEGs.
