# Supplementary material for: Differential Gene Profiling of the Heartwood Formation Process in Taiwania cryptomerioides Hayata Xylem Tissues
Source: Int J Mol Sci. 2020 Jan 31;21(3):960. doi: 10.3390/ijms21030960 (PMC7037362; doi:10.3390/ijms21030960)
Supplement: Supplementary file 1 [file ijms-21-00960-s001.zip › Table S1-S7.xlsx]

## Sheet: Table S1
Table S1. De novo assembly results of Taiwania RNA-seq transcriptome of the longest transcript collection.
Assembly results	Number / length (bp)
Total transcript	36654
N50	1209
Average transcript length	692.08
Total assembled length	25367333
Sequence length count
≥ 200 bp	36654
≥ 500 bp	14071
≥ 1000 bp	7745
≥ 5000 bp	38
≥ 10000 bp	1

## Sheet: Table S2
Table S2. The mean RPKM, Log2 (FC) and -Log2(FDR) values of the 1428 DEGs identified from SW-1, SW-2 and TZ.
1428 Feature ID	Contig Length (nt)	Mean RPKM			Log2(FC)			-Log2(FDR)			Differential Expression (up or down regulated)
		SW-1	SW-2	TZ	SW-1/SW-2	SW-1/TZ	SW-2/TZ	SW-1/SW-2	SW-1/TZ	SW-2/TZ	SW-1/SW-2	SW-1/TZ	SW-2/TZ
comp10007_c0_seq1	398	50.1827	30.535	2.31207	0.716728	4.43994	3.72321	0	13.4615	7.13031		UP
comp10033_c0_seq1	909	29.1109	8.38316	2.94007	1.79599	3.30764	1.51164	2.47656	11.4846	0.762711		UP
comp10034_c0_seq1	455	216.411	7.04744	1e-05	4.94053	24.3673	19.4267	26.5453	53.2201	7.12108	UP	UP
comp10053_c0_seq2	1992	289.944	181.262	10.6842	0.677694	4.76222	4.08452	0	37.2985	25.1275		UP	UP
comp10144_c0_seq1	361	3.05739	9.72554	80.3354	-1.66948	-4.71566	-3.04619	0.350967	28.3051	15.7755		DOWN	DOWN
comp10146_c0_seq1	414	4.17666	2.6111	21.7229	0.677694	-2.3788	-3.05649	0	7.39598	12.477			DOWN
comp10153_c0_seq1	210	5.54021	3.76678	34.5056	0.556606	-2.63882	-3.19542	0	11.3395	15.7859		DOWN	DOWN
comp10165_c0_seq1	620	3.23685	9.85807	34.6567	-1.60672	-3.42047	-1.81376	0.487513	20.0344	7.39088		DOWN
comp10179_c0_seq1	233	4.8249	0.914567	1e-05	2.39934	18.8801	16.4808	2.54455	8.08806	0		UP
comp10223_c0_seq1	1218	21.1727	1.99942	106.683	3.40456	-2.33305	-5.73761	6.3033	3.97256	20.9623			DOWN
comp10273_c0_seq1	1872	34.4656	7.26623	134.222	2.24588	-1.96139	-4.20727	3.56014	2.76641	15.3671			DOWN
comp10357_c0_seq1	376	8.08789	1e-05	1e-05	19.6254	19.6254	0	6.03538	7.75533	0		UP
comp10397_c0_seq2	649	7.64835	12.5025	0.688911	-0.708995	3.47276	4.18175	0	5.78932	8.73486			UP
comp10508_c0_seq1	454	1.1511	0.610908	25.2576	0.913984	-4.45564	-5.36962	0	17.1966	19.7006		DOWN	DOWN
comp10509_c0_seq2	507	3.21554	5.46782	20.6762	-0.765906	-2.68484	-1.91893	0	8.2128	4.859		DOWN
comp10540_c0_seq1	579	2.10758	3.24034	31.9285	-0.620556	-3.92118	-3.30063	0	19.7558	16.1072		DOWN	DOWN
comp10575_c0_seq1	454	6.01631	2.65811	0.356507	1.17848	4.07688	2.8984	0.501202	8.51478	0.806853		UP
comp10592_c0_seq1	497	14.6245	12.0771	88.9615	0.276117	-2.60479	-2.88091	0	8.00118	10.4621		DOWN	DOWN
comp10599_c0_seq1	680	6.38045	6.77183	177.998	-0.0858866	-4.80206	-4.71617	0	13.2965	12.5567		DOWN	DOWN
comp10669_c0_seq1	212	8.33798	16.367	1.34232	-0.973017	2.63497	3.60799	0	4.55978	9.05693			UP
comp10686_c0_seq1	209	20.617	13.7369	1.82421	0.585778	3.49849	2.91271	0	11.9679	5.60396		UP
comp10751_c0_seq1	878	5.21899	4.45772	34.3468	0.227465	-2.71833	-2.9458	0	12.7192	16.6739		DOWN	DOWN
comp10810_c0_seq1	244	4.99815	2.35842	1e-05	1.08358	18.931	17.8475	0	9.15215	1.98656		UP
comp10832_c0_seq1	516	16.4594	6.86593	1e-05	1.26139	20.6505	19.3891	0	11.9604	4.92363		UP
comp10846_c0_seq1	229	1.58652	1.28547	987.842	0.303571	-9.28227	-9.58584	0	72.4743	75.7399		DOWN	DOWN
comp10988_c0_seq1	501	2.1941	7.26021	43.692	-1.72638	-4.31567	-2.58929	0.0998908	19.1208	8.0355		DOWN	DOWN
comp10989_c0_seq1	632	8.83482	2.14867	1e-05	2.03976	19.7528	17.7131	2.74865	14.1876	1.26083		UP
comp11027_c0_seq2	485	8.02913	29.9296	39.1558	-1.89826	-2.28591	-0.387653	2.67441	7.75499	0		DOWN
comp11083_c0_seq1	550	12.6171	2.69466	1.29392	2.22721	3.28556	1.05835	5.88029	11.2305	0		UP
comp11203_c0_seq1	321	1.88229	0.485528	31.0997	1.95486	-4.04634	-6.0012	0	17.4742	27.0118		DOWN	DOWN
comp11224_c0_seq1	338	6.04345	10.492	39.4402	-0.795844	-2.70622	-1.91038	0	7.77681	4.07426		DOWN
comp11274_c0_seq1	1890	59.9835	53.5883	13.6347	0.162646	2.13728	1.97464	0	10.3431	6.49126		UP
comp11314_c0_seq1	222	6.33347	1.00859	0.0696056	2.65066	6.50765	3.85699	2.71108	8.0971	0.0381435		UP
comp11386_c0_seq1	217	7.13649	20.7474	58.1058	-1.53964	-3.0254	-1.48575	0.220452	10.5506	2.51335		DOWN
comp11396_c0_seq1	330	6.40105	0.202885	0.0936511	4.97958	6.09487	1.11529	9.13678	10.8962	0	UP	UP
comp11425_c0_seq1	592	2.65073	4.87527	19.9612	-0.879092	-2.91274	-2.03365	0	12.3341	7.70381		DOWN	DOWN
comp11454_c0_seq1	1033	3.09101	5.10651	15.677	-0.724258	-2.3425	-1.61824	0	8.17369	4.45609		DOWN
comp11461_c0_seq1	298	2.89569	4.36668	24.0855	-0.592628	-3.05619	-2.46356	0	13.3602	10.4135		DOWN	DOWN
comp11490_c0_seq1	495	2.52323	0.0565421	8.22151	5.4798	-1.70413	-7.18393	1.74473	2.73967	13.6985			DOWN
comp11501_c0_seq2	575	5.26199	20.4037	0.0506084	-1.95515	6.70009	8.65524	0	4.08872	9.02556			UP
comp11514_c0_seq2	319	1.56947	4.94291	18.6885	-1.65508	-3.5738	-1.91872	0	12.4772	4.16488		DOWN
comp11587_c0_seq1	306	2.20247	1e-05	12.5241	17.7488	-2.50751	-20.2563	0.371456	2.04262	8.3482			DOWN
comp11668_c0_seq2	433	9.54975	12.1846	49.0464	-0.351522	-2.36061	-2.00909	0	8.71488	6.75924		DOWN
comp11731_c0_seq1	562	1.92801	1.22024	35.321	0.659953	-4.19534	-4.8553	0	16.6971	19.5083		DOWN	DOWN
comp11750_c0_seq1	359	4.28723	12.5824	25.2631	-1.55329	-2.55892	-1.00562	0.371525	8.35018	1.07736		DOWN
comp11795_c0_seq2	229	1.42299	3.431	177.292	-1.2697	-6.96106	-5.69136	0	45.7948	37.866		DOWN	DOWN
comp11882_c0_seq1	208	2.24768	14.0175	1.57934	-2.64072	0.509115	3.14984	4.66228	0	8.41092			UP
comp11940_c0_seq1	691	3.19315	5.00218	16.3739	-0.647575	-2.35834	-1.71077	0	7.91868	4.32907		DOWN
comp11942_c0_seq1	488	10.1049	1e-05	0.0633296	19.9466	7.31796	-12.6287	7.18801	8.91425	0		UP
comp11973_c0_seq1	448	36.5727	49.8697	256.81	-0.447394	-2.81186	-2.36447	0	15.4389	11.6603		DOWN	DOWN
comp11987_c0_seq1	343	6.04622	2.03354	0.0901016	1.57204	6.06834	4.4963	0.951272	11.1282	1.39002		UP
comp11991_c0_seq1	311	4.32478	4.64883	32.0315	-0.104242	-2.88879	-2.78455	0	11.0554	9.97311		DOWN	DOWN
comp11995_c0_seq1	556	4.76494	10.1002	0.504162	-1.08386	3.2405	4.32436	0	4.26982	8.49129			UP
comp12033_c0_seq1	759	6.77096	1e-05	1e-05	19.369	19.369	0	6.41609	8.14181	0		UP
comp12107_c0_seq2	1159	4.7216	18.6802	54.6238	-1.98416	-3.53218	-1.54802	0.909374	8.5829	1.12824		DOWN
comp12114_c0_seq1	358	0.825121	6.34916	43.8655	-2.94389	-5.73234	-2.78845	1.87898	32.6389	14.3945		DOWN	DOWN
comp12171_c0_seq1	678	4.79046	18.8755	36.3797	-1.97828	-2.9249	-0.946621	2.53242	12.736	0.985957		DOWN
comp12181_c0_seq1	568	15.3068	10.9539	0.686572	0.482731	4.47862	3.99589	0	13.3863	7.26864		UP
comp12296_c0_seq1	733	5.00645	2.12065	1e-05	1.23928	18.9334	17.6941	0.171765	9.26282	1.41854		UP
comp12347_c0_seq1	304	3.51887	0.560526	919.728	2.65026	-8.02995	-10.6802	0.224071	64.551	80.1553		DOWN	DOWN
comp12414_c0_seq1	1078	6.09308	1e-05	0.0862674	19.2168	6.14221	-13.0746	7.24539	8.97233	0		UP
comp12433_c0_seq1	786	8.22598	8.1483	0.362912	0.0136886	4.50249	4.48881	0	8.39777	6.66416		UP
comp12437_c0_seq1	831	8.25915	18.8903	177.824	-1.19358	-4.42832	-3.23474	0	21.9523	13.3624		DOWN	DOWN
comp12478_c0_seq1	204	9.39506	2.19645	49.1232	2.09673	-2.38643	-4.48316	0.567867	2.45413	8.42711			DOWN
comp12488_c0_seq1	1033	7.02622	0.233541	0.119943	4.911	5.87233	0.961325	7.10769	11.5045	0		UP
comp12528_c0_seq1	757	8.54739	2.13408	0.218951	2.00187	5.2868	3.28494	1.85858	9.46182	0.33773		UP
comp12531_c0_seq2	843	6.63213	5.99384	24.3567	0.145991	-1.87677	-2.02276	0	6.05165	7.76871			DOWN
comp12541_c0_seq2	287	8.12917	6.02403	1e-05	0.43238	19.6327	19.2004	0	11.6362	6.74409		UP
comp12547_c0_seq2	556	2.23213	1.89279	58.4108	0.237906	-4.70974	-4.94765	0	22.4827	25.1275		DOWN	DOWN
comp12661_c0_seq2	1804	63.0865	8.70579	11.7061	2.85729	2.43007	-0.427216	11.752	10.1967	0	UP	UP
comp12737_c0_seq1	1268	6.97125	10.3661	51.8358	-0.572384	-2.89446	-2.32208	0	12.4318	8.33884		DOWN	DOWN
comp12807_c0_seq1	697	5.67728	0.0803109	1e-05	6.14346	19.1148	12.9714	9.60393	11.3508	0	UP	UP
comp12818_c0_seq2	382	7.16077	3.68506	1e-05	0.958425	19.4498	18.4913	0	9.00041	2.89347		UP
comp12851_c0_seq1	696	2.05508	7.08335	17.7297	-1.78523	-3.1089	-1.32367	0	8.26794	1.56024		DOWN
comp12928_c0_seq1	345	1.12294	3.74249	51.1344	-1.73672	-5.50894	-3.77222	0	32.7581	22.5945		DOWN	DOWN
comp12944_c0_seq1	215	13.1312	0.163107	1.95194	6.33104	2.75002	-3.58102	12.7244	5.30829	0.265933	UP
comp12959_c0_seq2	1914	138.519	113.515	11.7591	0.287205	3.55823	3.27103	0	20.6482	14.4857		UP	UP
comp13035_c0_seq1	428	15.2607	13.2705	2.38199	0.201591	2.67958	2.47799	0	9.35529	5.75161		UP
comp13191_c0_seq1	536	5.60707	27.4844	30.8567	-2.2933	-2.46027	-0.16697	4.92201	8.33892	0		DOWN
comp13238_c0_seq1	238	2.6015	3.67311	66.5093	-0.49766	-4.67614	-4.17848	0	25.8077	23.372		DOWN	DOWN
comp13242_c0_seq1	519	15.1228	0.78257	0.226015	4.27237	6.06417	1.7918	4.82202	7.98941	0		UP
comp13248_c0_seq1	927	6.42445	5.39472	45.1732	0.252026	-2.81382	-3.06585	0	12.0366	14.8209		DOWN	DOWN
comp13268_c0_seq1	1130	6.77187	13.6607	43.83	-1.0124	-2.69429	-1.68189	0	12.3565	5.19498		DOWN
comp13372_c0_seq1	537	3.46182	3.62689	33.5437	-0.0672052	-3.27644	-3.20924	0	16.8076	17.7878		DOWN	DOWN
comp13443_c0_seq1	212	2.97455	7.07951	41.0866	-1.25098	-3.78793	-2.53695	0	16.5993	9.3005		DOWN	DOWN
comp13557_c1_seq1	1905	26.2177	10.2386	4.88841	1.35653	2.4231	1.06657	3.25987	13.0046	0.626367		UP
comp13570_c0_seq1	204	3.11679	0.649391	12.9744	2.2629	-2.05754	-4.32044	0.120526	3.17588	10.8441			DOWN
comp13578_c0_seq1	229	185.234	43.3972	3.82478	2.09367	5.59783	3.50415	0.885621	12.7703	3.91681		UP
comp13585_c0_seq1	296	9.35915	1.83101	0.432684	2.35374	4.43499	2.08125	2.55495	9.25321	0.046513		UP
comp13646_c0_seq1	399	35.4341	25.7758	2.50183	0.459121	3.82408	3.36496	0	7.64437	4.44836		UP
comp13654_c0_seq2	1672	5.7098	15.3868	65.6576	-1.43018	-3.52345	-2.09327	0.0998908	16.6506	6.31672		DOWN
comp13768_c0_seq1	1279	7.34933	16.519	59.6305	-1.16844	-3.02036	-1.85193	0	10.3504	3.86292		DOWN
comp13808_c0_seq1	208	15.4066	2.13894	30.1222	2.84859	-0.967273	-3.81586	3.52608	0.00420594	7.71469			DOWN
comp13856_c0_seq1	1054	14.9018	69.035	200.941	-2.21184	-3.75321	-1.54137	0.999558	8.96159	1.13007		DOWN
comp13909_c0_seq8	2747	33.6111	13.6607	6.04006	1.29891	2.4763	1.1774	0.999313	7.69449	0.458332		UP
comp13922_c0_seq1	1942	23.5496	15.304	3.23054	0.621792	2.86585	2.24406	0.0121774	16.247	6.04291		UP
comp13927_c0_seq1	1145	68.3617	5.7632	0.638748	3.56825	6.7418	3.17355	14.9154	32.1158	2.31223	UP	UP
comp13956_c0_seq2	1383	15.8925	0.0169043	1e-05	9.87674	20.5999	10.7232	10.6154	12.4064	0	UP	UP
comp13961_c0_seq1	276	406.976	0.157874	0.105434	11.332	11.9144	0.582432	29.3505	31.5894	0	UP	UP
comp14030_c0_seq1	1382	91.0634	132.176	18.5248	-0.537513	2.29741	2.83492	0	9.93605	12.5813		UP	UP
comp14032_c0_seq1	1015	14.4977	28.4441	4.45961	-0.972303	1.70084	2.67314	0	3.72264	8.49591			UP
comp14050_c0_seq1	766	34.3392	2.35793	2.3861	3.86427	3.84713	-0.0171337	20.6639	22.582	0	UP	UP
comp14070_c0_seq1	308	2.21529	3.14499	17.5371	-0.505558	-2.98484	-2.47928	0	8.12998	5.62844		DOWN
comp14078_c0_seq2	1339	39.3895	24.1501	2.32182	0.705783	4.08448	3.3787	0	17.8047	9.02403		UP	UP
comp14122_c0_seq1	917	47.2687	47.4295	445.778	-0.00489934	-3.23737	-3.23247	0	20.4794	21.182		DOWN	DOWN
comp14127_c0_seq1	2439	37.7005	22.0106	7.44559	0.776385	2.34012	1.56374	0.188888	10.4635	2.28813		UP
comp14151_c0_seq1	1099	147.891	25.9697	3.47048	2.50964	5.41326	2.90362	2.92395	16.2689	3.28178		UP
comp14154_c0_seq2	1217	55.6338	11.3703	0.561174	2.29069	6.63137	4.34068	7.43972	33.0733	7.67176		UP	UP
comp14157_c0_seq2	398	1.32566	1.90158	18.3293	-0.520491	-3.78938	-3.26888	0	18.5133	15.6152		DOWN	DOWN
comp14180_c0_seq2	710	37.8734	0.506893	0.384522	6.22336	6.62198	0.398617	28.4051	30.6189	0	UP	UP
comp14193_c0_seq1	1428	96.4939	51.5572	1.00102	0.904262	6.59089	5.68663	0.521566	43.4404	27.8169		UP	UP
comp14195_c0_seq1	352	1.69621	14.9371	12.9997	-3.13852	-2.93809	0.200421	8.07603	8.07811	0	DOWN	DOWN
comp14207_c0_seq1	1273	60.6407	17.6619	0.592882	1.77965	6.6764	4.89675	1.57814	21.1648	7.7403		UP	UP
comp14268_c0_seq1	410	19.111	1e-05	0.0402336	20.866	8.89179	-11.9742	10.5097	12.3049	0	UP	UP
comp14275_c0_seq1	1729	17.8136	0.154069	0.0537862	6.85326	8.37153	1.51827	21.7083	23.7635	0	UP	UP
comp14312_c0_seq1	359	2.07839	1.58568	18.8482	0.390366	-3.18089	-3.57125	0	12.5446	15.828		DOWN	DOWN
comp14346_c0_seq1	1442	329.623	137.369	78.2442	1.26276	2.07476	0.811997	2.27863	9.54053	0.361303		UP
comp14390_c0_seq1	1448	49.8433	19.5659	0.739624	1.34906	6.07446	4.72541	2.9144	38.3476	16.398		UP	UP
comp14394_c0_seq1	293	40.7635	30.8094	4.24977	0.403907	3.26182	2.85791	0	10.8815	6.36153		UP
comp14488_c0_seq1	2443	17.2602	0.791554	7.06429	4.44661	1.28883	-3.15778	14.9154	2.08187	4.52662	UP
comp14512_c0_seq1	1226	107.447	75.7365	5.68199	0.504571	4.24109	3.73652	0	25.8707	17.1269		UP	UP
comp14517_c0_seq1	879	44.5617	0.0354606	1e-05	10.2954	22.0874	11.792	19.6267	21.4982	0	UP	UP
comp14519_c0_seq1	627	27.1762	0.260998	0.669193	6.70216	5.34377	-1.35838	23.519	23.2081	0	UP	UP
comp14580_c0_seq1	1696	22.6088	25.4053	110.233	-0.168243	-2.2856	-2.11736	0	9.2203	8.69196		DOWN	DOWN
comp14630_c0_seq1	318	6.40859	7.31017	160.426	-0.189897	-4.64576	-4.45586	0	29.4471	27.9245		DOWN	DOWN
comp14631_c0_seq2	232	25.0008	14.4108	2.9226	0.794826	3.09665	2.30182	0	10.8998	3.73223		UP
comp14718_c0_seq1	797	22.8621	1.3489	90.5026	4.0831	-1.985	-6.0681	15.2514	6.09637	39.2415	UP		DOWN
comp14764_c0_seq1	351	1.89832	3.19558	23.884	-0.751352	-3.65325	-2.90189	0	14.0352	10.7844		DOWN	DOWN
comp14765_c0_seq2	838	78.2624	4.74735	2.06227	4.04312	5.24601	1.20289	17.0483	26.139	0.0779707	UP	UP
comp14811_c0_seq1	963	75.273	102.918	8.33692	-0.451287	3.17455	3.62583	0	11.6653	12.2243		UP	UP
comp14896_c0_seq3	1656	37.0548	19.288	8.01837	0.94196	2.20828	1.26632	0.584721	8.68075	1.04741		UP
comp14911_c0_seq1	763	8.15381	3.08464	0.269337	1.40237	4.91999	3.51762	0.628667	10.1116	1.37403		UP
comp14912_c0_seq2	469	22.6333	6.48516	1.17023	1.80323	4.27358	2.47035	2.84339	15.9526	2.18085		UP
comp14919_c0_seq1	1768	12.3031	5.29996	1.12542	1.21497	3.45048	2.23551	0.214381	7.9958	1.31685		UP
comp14928_c0_seq1	559	17.341	4.11817	0.138215	2.07411	6.97113	4.89702	6.50992	28.4538	4.67004		UP
comp1493_c0_seq1	477	6.06301	2.35709	1e-05	1.36303	19.2097	17.8467	0.550712	9.76019	1.7967		UP
comp1495_c0_seq1	237	22.7102	5.70863	2.16706	1.99212	3.38953	1.39741	2.08782	8.75315	0.232209		UP
comp1504_c0_seq1	1532	3.02148	12.1248	34.7439	-2.00463	-3.52343	-1.5188	0.728961	9.35261	1.31221		DOWN
comp15062_c0_seq1	267	5.07515	0.0875605	26.4566	5.85703	-2.38211	-8.23913	4.7626	4.24481	20.7126			DOWN
comp15101_c0_seq1	823	9.34479	0.359813	0.415602	4.69884	4.49089	-0.207953	8.66597	10.4095	0	UP	UP
comp15113_c0_seq1	964	10.5679	3.43017	0.31041	1.62333	5.08936	3.46603	1.40029	11.2642	1.58123		UP
comp15121_c0_seq1	1050	6.04886	0.658552	0.249377	3.19929	4.60026	1.40097	4.37309	7.88795	0		UP
comp15160_c0_seq1	943	9.40223	1e-05	1e-05	19.8426	19.8426	0	10.2647	12.0514	0	UP	UP
comp15161_c0_seq1	1949	348.545	401.634	42.0877	-0.204537	3.04987	3.25441	0	18.5062	17.4071		UP	UP
comp1518_c0_seq1	425	32.1763	30.5676	3.45365	0.0739952	3.2198	3.14581	0	11.4918	8.54164		UP	UP
comp15223_c0_seq1	823	11.6222	11.0736	0.818659	0.0697601	3.82747	3.75771	0	13.9237	10.4684		UP	UP
comp15228_c0_seq1	741	12.9797	17.9162	61.3108	-0.465013	-2.23989	-1.77487	0	8.58365	5.73026		DOWN
comp15249_c0_seq1	361	9.95726	6.83402	0.206913	0.543015	5.58866	5.04564	0	8.90979	4.47547		UP
comp1526_c0_seq1	940	22.0521	4.32785	0.789865	2.34919	4.80317	2.45397	5.38236	17.8032	1.26649		UP
comp15268_c0_seq1	813	5.34868	9.53662	31.7361	-0.834294	-2.56887	-1.73458	0	12.1479	6.30861		DOWN
comp15330_c0_seq1	239	12.0341	40.1889	143.724	-1.73967	-3.5781	-1.83843	1.40666	19.1242	5.4128		DOWN
comp15354_c0_seq1	1002	10.747	3.79653	1.22742	1.50118	3.13024	1.62906	1.14407	7.82937	0.323324		UP
comp15357_c0_seq1	570	7.36263	37.2827	55.3888	-2.34021	-2.9113	-0.571089	3.69322	9.55299	0		DOWN
comp15371_c0_seq1	1628	6.63974	0.163861	5.40735	5.34058	0.296205	-5.04438	8.85307	0	6.75924	UP
comp15384_c0_seq1	378	10.6602	33.157	111.716	-1.63708	-3.38953	-1.75245	0	7.96135	1.75447		DOWN
comp15424_c0_seq1	1405	5.54989	0.427063	0.414455	3.69994	3.74317	0.0432341	6.26899	7.98922	0		UP
comp15435_c0_seq1	264	33.7486	29.7039	4.35325	0.184177	2.95466	2.77049	0	8.38591	5.36206		UP
comp15466_c0_seq1	577	2.91778	7.06317	19.7596	-1.27544	-2.75961	-1.48417	0	8.106	2.67204		DOWN
comp15531_c0_seq1	1618	9.35722	1.41733	1e-05	2.7229	19.8357	17.1128	4.10701	12.6187	0.364262		UP
comp15547_c0_seq1	787	11.6555	69.6512	278.628	-2.57914	-4.57926	-2.00012	8.54987	36.1622	7.82872	DOWN	DOWN	DOWN
comp15550_c0_seq1	1804	6.37602	4.75976	0.508496	0.421767	3.64835	3.22658	0	8.14181	3.43908		UP
comp15571_c0_seq1	1049	9.37649	0.0965737	1e-05	6.60127	19.8387	13.2374	11.2214	13.0028	0	UP	UP
comp15578_c0_seq1	1217	18.8084	3.09086	0.637447	2.60529	4.88293	2.27763	8.10285	19.8697	0.626225	UP	UP
comp15618_c0_seq1	1826	6.27954	1.12287	0.141545	2.48346	5.47133	2.98787	4.56808	12.8886	0.0779707		UP
comp15638_c0_seq1	273	10.3604	17.8282	1.79711	-0.783079	2.52733	3.31041	0	7.47104	12.649			UP
comp15648_c0_seq1	1031	8.71328	0.349068	7.56719	4.64163	0.203458	-4.43818	9.47606	0	7.34624	UP
comp15698_c0_seq1	1358	23.8154	80.8575	424.325	-1.76349	-4.1552	-2.39172	0.613456	15.2781	5.03193		DOWN
comp15710_c0_seq1	354	6.91132	28.4758	253.644	-2.0427	-5.1977	-3.155	0.0736383	10.8352	3.79557		DOWN
comp15755_c0_seq1	616	5.2583	7.44603	35.4138	-0.501875	-2.75164	-2.24977	0	12.703	9.16445		DOWN	DOWN
comp15795_c0_seq3	566	65.4788	29.9011	2.31261	1.13083	4.82343	3.6926	0.722645	25.351	11.625		UP	UP
comp15807_c0_seq1	865	8.47882	1.96885	0.412177	2.10651	4.36253	2.25602	3.516	11.3508	0.384091		UP
comp15816_c0_seq1	262	13.8521	0.0892315	1e-05	7.27834	20.4017	13.1233	15.5443	17.391	0	UP	UP
comp15841_c0_seq1	817	654.471	592.428	38.8509	0.14369	4.07431	3.93062	0	30.0099	24.732		UP	UP
comp15913_c0_seq1	594	11.9131	6.37503	0.60934	0.90205	4.28916	3.38711	0	8.35039	2.87342		UP
comp15919_c0_seq1	577	7.83783	1.17576	0.171533	2.73686	5.51389	2.77703	2.16928	8.41197	0.0160298		UP
comp15949_c0_seq1	1462	7.17803	0.239411	19.4704	4.90602	-1.43962	-6.34565	7.22409	2.48272	25.597			DOWN
comp15957_c0_seq1	564	5.18684	33.1841	82.9647	-2.67756	-3.99957	-1.32201	2.05436	9.15285	0.50632		DOWN
comp15958_c0_seq2	577	9.01805	0.191552	0.100866	5.55701	6.4823	0.925292	13.6379	15.4123	0	UP	UP
comp15982_c0_seq1	1733	9.35516	22.3505	3.04906	-1.25647	1.6174	2.87387	0.455539	2.53701	9.74872			UP
comp15985_c0_seq1	584	8.52146	47.1105	95.435	-2.46688	-3.48535	-1.01847	6.02412	18.893	1.33455		DOWN
comp15994_c0_seq1	2961	53.6125	29.9754	1.82334	0.838789	4.87792	4.03913	0	12.3349	6.8681		UP
comp16002_c0_seq1	1336	10.0587	0.307703	53.5595	5.03076	-2.4127	-7.44346	8.19159	5.7448	28.0198	UP		DOWN
comp16012_c0_seq1	401	5.84852	0.0388652	1e-05	7.23345	19.1577	11.9243	10.408	12.1954	0	UP	UP
comp16030_c0_seq1	284	5.6945	0.13971	1e-05	5.34906	19.1192	13.7701	7.14042	8.86408	0		UP
comp16039_c0_seq1	423	6.75076	10.7854	33.1155	-0.675952	-2.29438	-1.61843	0	7.83426	3.82104		DOWN
comp16058_c0_seq3	1124	8.4472	3.59851	0.276207	1.23107	4.93465	3.70358	0.687932	11.514	1.89357		UP
comp16096_c0_seq1	1832	9.55118	11.3193	85.5089	-0.245034	-3.16232	-2.91729	0	16.7209	15.2283		DOWN	DOWN
comp16103_c0_seq1	2542	5873.23	10569	1768.82	-0.847612	1.73137	2.57898	0	5.16431	8.33884			UP
comp16103_c1_seq1	3956	8560.09	14488.2	1267.86	-0.759179	2.75524	3.51441	0	11.1968	14.7549		UP	UP
comp16117_c0_seq1	1226	7.09931	9.01199	35.0169	-0.344167	-2.3023	-1.95813	0	8.91621	7.06304		DOWN
comp16132_c0_seq2	853	10.7762	0.341549	0.126808	4.97961	6.40906	1.42945	4.45304	8.08929	0		UP
comp16134_c0_seq1	639	4.4481	5.20502	35.991	-0.226714	-3.01637	-2.78966	0	11.5339	10.4825		DOWN	DOWN
comp16182_c0_seq2	649	16.3831	8.85987	2.89046	0.886852	2.50284	1.61599	0.593532	10.4141	1.50149		UP
comp16228_c0_seq1	243	19.1012	3.40406	0.135768	2.48834	7.13638	4.64804	5.15946	20.2846	2.4435		UP
comp16240_c0_seq1	437	50.9738	1e-05	0.141441	22.2813	8.49341	-13.7879	6.42098	8.15715	0		UP
comp16270_c0_seq1	604	6.50443	0.528986	0.163865	3.62012	5.31084	1.69072	2.93519	8.28538	0		UP
comp16306_c0_seq1	734	4.87546	13.1799	48.5185	-1.43473	-3.31493	-1.88019	0.430743	17.7443	6.77004		DOWN
comp16308_c0_seq1	622	18.0448	0.262573	1e-05	6.10272	20.7832	14.6804	26.5946	28.7917	0	UP	UP
comp16355_c0_seq1	844	174.659	58.2187	3.11331	1.58499	5.80995	4.22496	2.5088	34.2229	15.7454		UP	UP
comp16359_c0_seq1	1141	14.8175	9.92528	0.587062	0.578121	4.65764	4.07952	0	10.7572	5.42986		UP
comp16364_c0_seq1	601	3.39231	19.2515	26.1398	-2.50463	-2.94591	-0.441273	4.78549	9.59576	0		DOWN
comp16386_c0_seq1	705	9.28026	4.7181	0.360372	0.975958	4.68661	3.71065	0	11.3611	3.06059		UP
comp16389_c0_seq2	982	506.278	376.698	76.7905	0.42652	2.72093	2.29441	0	7.95372	3.89355		UP
comp16408_c0_seq1	1426	22.495	29.393	331.796	-0.38587	-3.88262	-3.49675	0	28.5209	24.6016		DOWN	DOWN
comp16433_c0_seq1	826	9.05882	13.0668	112.927	-0.528514	-3.63992	-3.1114	0	7.77681	5.53863		DOWN
comp1646_c0_seq1	752	6.29659	10.1318	32.026	-0.686247	-2.3466	-1.66035	0	8.45589	4.74136		DOWN
comp16462_c0_seq1	319	4.82273	7.07692	30.3614	-0.55327	-2.65431	-2.10104	0	11.3824	7.89509		DOWN	DOWN
comp16500_c0_seq3	3720	16.8545	7.88114	2.85613	1.09666	2.561	1.46434	0.979482	9.68304	1.14738		UP
comp16502_c0_seq2	1177	43.431	0.0966094	0.0807842	8.81235	9.07044	0.25809	27.2712	29.499	0	UP	UP
comp16515_c0_seq2	1170	12.6735	32.9663	329.108	-1.37918	-4.69868	-3.3195	0.560895	35.8432	20.5042		DOWN	DOWN
comp16540_c0_seq2	3606	283.268	174.832	7.63695	0.696203	5.21303	4.51683	0	26.2062	17.8689		UP	UP
comp16571_c0_seq1	256	20.0989	4.62546	2.73485	2.11945	2.87758	0.758133	4.32257	8.75315	0		UP
comp16579_c0_seq2	1857	40.0427	1.78992	1.12336	4.48357	5.15565	0.672078	22.4495	28.3218	0	UP	UP
comp16582_c0_seq2	2301	50.3898	34.292	11.2957	0.55526	2.15736	1.6021	0	8.69884	2.68039		UP
comp16596_c0_seq1	516	41.2067	0.0604068	0.433679	9.41395	6.57011	-2.84385	33.9172	33.0134	0	UP	UP
comp16640_c0_seq1	394	22.3432	23.681	4.67151	-0.0838989	2.25787	2.34177	0	7.96231	6.30802		UP
comp16657_c0_seq1	846	26.1447	1e-05	1e-05	21.3181	21.3181	0	11.5521	13.3249	0	UP	UP
comp16665_c0_seq1	1286	10.296	0.935706	2.85102	3.45989	1.85254	-1.60735	8.19159	3.86792	0.232209	UP
comp16672_c0_seq1	1400	11.375	27.4164	246.949	-1.26917	-4.44028	-3.1711	0.0671583	30.6668	18.022		DOWN	DOWN
comp16678_c0_seq2	425	14.6685	31.5552	81.9292	-1.10516	-2.48166	-1.3765	0	9.8912	2.89461		DOWN
comp16681_c0_seq1	456	5.3963	3.97508	0.176299	0.440988	4.93588	4.49489	0	10.2316	4.68029		UP
comp16686_c0_seq1	560	15.2347	2.75205	2.42022	2.46878	2.65415	0.185369	7.95619	9.68384	0	UP	UP
comp16719_c0_seq1	1153	37.2199	14.4621	1.35542	1.36379	4.77926	3.41547	0.989882	20.3505	7.00547		UP
comp16738_c0_seq1	1217	29.4528	109.685	1160.2	-1.89689	-5.29982	-3.40294	0.94812	23.605	10.8112		DOWN	DOWN
comp16749_c0_seq1	547	11.239	23.1467	84.0694	-1.04229	-2.90307	-1.86078	0	12.5881	5.33186		DOWN
comp16751_c0_seq1	1198	4.67618	0.582225	9.60292	3.00568	-1.03814	-4.04383	2.06887	0.361881	10.8972			DOWN
comp16784_c0_seq1	1200	66.3312	48.0159	4.42436	0.466175	3.90615	3.43997	0	9.2677	5.62125		UP
comp16792_c0_seq1	242	66.7287	1e-05	0.240495	22.6699	8.11616	-14.5537	15.6231	15.2816	0	UP	UP
comp16796_c0_seq1	512	50.6656	35.0969	2.03095	0.529664	4.64078	4.11112	0	25.046	16.3835		UP	UP
comp16803_c0_seq1	340	3.04286	6.40122	32.3795	-1.07292	-3.41158	-2.33866	0	17.4646	10.5124		DOWN	DOWN
comp16804_c0_seq1	630	7.9556	1e-05	1e-05	19.6016	19.6016	0	7.31073	9.03623	0		UP
comp16810_c0_seq1	1382	29.7443	1.80651	10.6481	4.04134	1.48202	-2.55932	14.2645	2.61527	3.94736	UP
comp16815_c0_seq2	1332	5.68356	3.82191	46.0117	0.5725	-3.01713	-3.58963	0	14.8991	19.4488		DOWN	DOWN
comp16815_c1_seq1	215	2.34952	2.86849	17.3368	-0.287925	-2.8834	-2.59547	0	8.99223	7.95656		DOWN	DOWN
comp16834_c0_seq1	1105	5.12291	5.96726	26.8857	-0.220103	-2.3918	-2.1717	0	10.0233	8.94371		DOWN	DOWN
comp16847_c0_seq1	949	6.16997	0.858863	10.8919	2.84476	-0.819918	-3.66468	2.44802	0.087811	7.66946			DOWN
comp16850_c0_seq2	481	72.4673	0.155396	0.0604986	8.86523	10.2262	1.36098	29.1277	31.3256	0	UP	UP
comp16879_c0_seq1	1710	17.3597	0.870011	2.94479	4.31857	2.55951	-1.75906	12.6602	7.2924	0.278513	UP
comp16895_c0_seq1	496	70.5776	20.8857	1.21802	1.75669	5.8566	4.09991	3.09966	29.4608	10.8806		UP	UP
comp16900_c0_seq1	780	774.276	176.71	17.3518	2.13147	5.47969	3.34822	5.782	37.3267	13.482		UP	UP
comp16908_c0_seq1	523	68.4847	95.1027	1004.54	-0.473705	-3.87461	-3.40091	0	23.6902	19.2361		DOWN	DOWN
comp16916_c0_seq1	1318	23.8461	0.480838	0.256776	5.63206	6.5371	0.905044	25.4687	27.7304	0	UP	UP
comp16939_c0_seq1	1562	5.53298	17.0157	90.7502	-1.62074	-4.03577	-2.41503	0.589135	21.1074	8.50657		DOWN	DOWN
comp16945_c0_seq2	1663	19.3944	11.8106	4.65238	0.715562	2.0596	1.34404	0.0404549	8.26794	1.38042		UP
comp16955_c0_seq1	588	17.3368	8.26271	1.74347	1.06915	3.31381	2.24465	0	8.38809	1.98207		UP
comp16974_c0_seq2	1549	29.9531	26.9598	0.213822	0.151896	7.13015	6.97826	0	26.4623	21.7469		UP	UP
comp16988_c0_seq1	1555	13.1927	4.55912	0.293038	1.53291	5.4925	3.95959	0.430333	10.1279	2.03988		UP
comp17020_c0_seq1	364	2.92674	12.7555	248.58	-2.12375	-6.40827	-4.28452	0.698191	33.6055	19.5504		DOWN	DOWN
comp17021_c0_seq1	642	173.099	2.43375	0.184119	6.15228	9.87675	3.72447	23.1376	33.7351	0.40507	UP	UP
comp17025_c0_seq2	1718	28.8445	4.76025	49.8717	2.59919	-0.789922	-3.38911	8.84333	0.235252	16.1425	UP		DOWN
comp17040_c0_seq1	2107	43.2435	70.7644	559.926	-0.710542	-3.69468	-2.98414	0	16.2571	11.2655		DOWN	DOWN
comp17041_c0_seq1	242	23.9481	7.03157	0.560342	1.768	5.41746	3.64947	0.515283	9.86213	2.06923		UP
comp17050_c0_seq1	203	9.04011	7.41181	0.793429	0.286513	3.51017	3.22365	0	9.59755	5.46328		UP
comp17052_c0_seq1	1846	50.1636	25.5791	7.47345	0.971674	2.7468	1.77512	0.171765	9.10253	1.88864		UP
comp17072_c0_seq2	387	30.0997	18.114	4.12532	0.732642	2.86717	2.13453	0	10.0926	3.2031		UP
comp17090_c0_seq1	1275	17.3047	5.19642	0.310509	1.73557	5.80038	4.06481	3.15511	19.6493	3.34929		UP
comp17098_c0_seq2	2567	21.8808	8.21394	1.77683	1.41352	3.62229	2.20877	3.38828	20.2583	3.06297		UP
comp17100_c0_seq2	1936	29.3378	0.454868	3.28365	6.01117	3.15939	-2.85178	20.8466	11.5465	1.42155	UP	UP
comp17106_c0_seq1	1239	35.35	118.067	185.361	-1.73983	-2.39056	-0.65073	3.66848	11.9261	0.396751		DOWN
comp17121_c0_seq1	786	40.9158	59.3014	7.70533	-0.535407	2.40873	2.94414	0	6.85474	8.21759			UP
comp17153_c0_seq1	3279	38.7378	14.6579	0.682194	1.40206	5.82741	4.42535	2.53886	30.985	11.7265		UP	UP
comp17177_c0_seq1	768	47.0778	21.354	1.03032	1.14054	5.51388	4.37334	1.69229	33.9966	15.8507		UP	UP
comp1718_c0_seq2	261	5.5535	4.90829	64.2512	0.178177	-3.53226	-3.71043	0	14.4574	17.2081		DOWN	DOWN
comp17193_c0_seq2	1134	29.0257	14.82	3.47258	0.969789	3.06325	2.09346	1.57489	19.4721	4.69646		UP
comp17194_c0_seq1	614	24.8399	72.1184	194.992	-1.53771	-2.97268	-1.43497	0.500692	9.56744	1.72117		DOWN
comp17217_c0_seq2	781	6.27467	0.157607	1.22676	5.31513	2.35468	-2.96045	8.0739	4.3456	0.381918	UP
comp17221_c0_seq1	704	9.57054	2.54448	0.124005	1.91123	6.27013	4.3589	1.88556	12.9553	1.5784		UP
comp17228_c0_seq1	1122	4.91865	0.0625098	1e-05	6.29804	18.9079	12.6099	6.44789	8.18607	0		UP
comp17259_c0_seq1	1151	63.7517	16.1676	1.22115	1.97936	5.70615	3.72679	2.71382	21.0352	5.72497		UP
comp17272_c0_seq2	957	16.0532	6.88002	0.0912221	1.22237	7.45926	6.23689	0	11.2029	4.4887		UP
comp17302_c0_seq1	431	358.69	222.528	32.4781	0.688752	3.4652	2.77645	0	11.8886	6.18213		UP
comp17321_c0_seq1	1366	9.83687	0.0866153	0.0678731	6.82743	7.17922	0.351783	8.87964	10.6333	0	UP	UP
comp1734_c0_seq1	644	13.1274	11.1125	0.489562	0.240386	4.74494	4.50456	0	11.0918	7.72539		UP	UP
comp17364_c0_seq1	2357	16.3596	12.3833	3.54843	0.401736	2.20488	1.80314	0	8.6853	3.366		UP
comp17391_c0_seq2	245	3.71269	6.19703	31.529	-0.739111	-3.08614	-2.34703	0	7.90636	4.89059		DOWN
comp17395_c0_seq1	364	1.57181	16.7632	27.0804	-3.4148	-4.10676	-0.691956	3.21174	8.88623	0.0339209		DOWN
comp17422_c0_seq1	971	105.708	5.82007	3.15569	4.18291	5.06599	0.883083	21.4129	29.0351	0	UP	UP
comp17444_c0_seq1	1875	10.7555	12.9278	1.22954	-0.265398	3.12888	3.39428	0	9.26282	9.38342		UP	UP
comp17462_c0_seq1	1160	219.061	388.57	928.442	-0.826837	-2.08348	-1.25664	0	8.0971	2.62638		DOWN
comp17483_c0_seq5	1164	27.9598	31.8482	1.95139	-0.187855	3.84078	4.02864	0	10.7918	10.0626		UP	UP
comp17495_c0_seq1	628	1.9955	2.48648	16.7798	-0.317353	-3.0719	-2.75455	0	8.62379	7.61994		DOWN
comp17540_c0_seq2	462	10.673	1e-05	1e-05	20.0255	20.0255	0	10.7956	12.5862	0	UP	UP
comp17626_c0_seq1	1530	23.4205	5.7879	0.845675	2.01666	4.79152	2.77486	4.05529	17.9213	2.03988		UP
comp17635_c0_seq1	425	48.8202	14.0332	9.77826	1.79864	2.31983	0.521192	3.74519	8.3535	0		UP
comp17639_c0_seq1	758	7.84754	8.75999	88.0776	-0.158689	-3.48846	-3.32977	0	12.4384	11.7319		DOWN	DOWN
comp17654_c0_seq1	1025	5.91347	2.20635	0.183217	1.42235	5.01238	3.59003	0.905873	8.2582	0.423154		UP
comp17663_c0_seq1	1128	78.3106	33.6642	19.6187	1.21799	1.99698	0.778988	2.10183	8.75997	0.20211		UP
comp17680_c0_seq1	649	21.1419	3.77656	0.0476192	2.48496	8.79435	6.30939	9.18808	30.4592	3.92977	UP	UP
comp17706_c0_seq1	1571	180.268	35.6915	6.02771	2.33649	4.90239	2.5659	8.447	32.6609	6.53657	UP	UP
comp17714_c0_seq1	652	10.9882	4.61087	0.963828	1.25285	3.51104	2.25819	1.57876	12.75	1.43981		UP
comp17744_c0_seq1	1756	12.0302	0.592102	0.600052	4.34467	4.32542	-0.019243	12.4201	11.9868	0	UP	UP
comp1778_c0_seq1	443	4.13161	5.12522	27.1446	-0.310911	-2.71589	-2.40498	0	12.0701	11.0196		DOWN	DOWN
comp17780_c0_seq1	699	2.36299	106.76	81.7893	-5.49762	-5.11323	0.384388	21.2627	20.3563	0	DOWN	DOWN
comp178_c0_seq1	276	2.70299	3.99936	258.886	-0.565212	-6.58162	-6.0164	0	48.5734	45.1994		DOWN	DOWN
comp17813_c0_seq1	652	8.22842	19.3595	132.262	-1.23435	-4.00664	-2.77228	0	26.2629	14.4101		DOWN	DOWN
comp17821_c0_seq1	1712	9.66008	6.0659	87.0165	0.671312	-3.17118	-3.84249	0	5.74301	8.19857			DOWN
comp17851_c0_seq1	1600	6.33302	13.0289	40.1743	-1.04075	-2.66531	-1.62456	0	12.6978	5.38796		DOWN
comp17868_c0_seq1	542	156.292	80.5854	6.28484	0.955654	4.63622	3.68057	0	15.0766	7.7403		UP	UP
comp17882_c0_seq1	768	15.245	11.4387	1.95423	0.414419	2.96367	2.54925	0	10.3514	4.51457		UP
comp17893_c0_seq2	350	5.32734	17.3521	225.403	-1.70362	-5.40294	-3.69932	0.356502	28.3442	15.828		DOWN	DOWN
comp17954_c0_seq1	297	1929.26	6.59892	1.46031	8.1916	10.3676	2.17596	13.6486	20.3175	0.262307	UP	UP
comp17968_c0_seq1	625	16.6764	7.35999	0.378705	1.18003	5.46059	4.28056	0.891421	19.8274	6.46034		UP
comp18004_c0_seq2	293	8.07489	1e-05	1e-05	19.6231	19.6231	0	10.2946	12.0891	0	UP	UP
comp18046_c0_seq2	393	30.4156	16.4802	0.619707	0.884082	5.61708	4.733	0	10.851	5.57149		UP
comp18078_c0_seq1	637	15.1774	0.293594	1e-05	5.69195	20.5335	14.8415	9.76846	14.143	0	UP	UP
comp18083_c0_seq2	1879	5.86244	5.33029	39.3513	0.137287	-2.74684	-2.88413	0	12.2474	14.7184		DOWN	DOWN
comp1810_c0_seq1	1256	30.2901	7.25925	5.93807	2.06095	2.35078	0.289826	6.95696	9.73853	0		UP
comp18139_c0_seq1	517	164.149	119.531	24.5685	0.457614	2.74012	2.28251	0	12.2474	6.18754		UP
comp1814_c0_seq1	311	3.37524	2.31233	31.3763	0.545642	-3.21661	-3.76225	0	14.0904	18.5905		DOWN	DOWN
comp18169_c0_seq1	785	5.02054	12.0934	28.122	-1.26831	-2.48578	-1.21747	0	8.92769	2.16084		DOWN
comp18178_c0_seq4	915	10.2642	0.0305884	1e-05	8.39042	19.9692	11.5788	18.8664	20.7144	0	UP	UP
comp18185_c0_seq4	582	22.1655	2.47613	1.56493	3.16215	3.82414	0.661989	5.20846	8.49581	0		UP
comp18190_c0_seq1	1817	30.6215	0.32655	0.23331	6.5511	7.03615	0.485053	21.2393	23.1935	0	UP	UP
comp18192_c0_seq3	963	34.4767	96.4599	228.558	-1.48431	-2.72887	-1.24456	0.868401	10.2463	1.51807		DOWN
comp18207_c0_seq1	1721	8.07123	0.104975	2.37179	6.26468	1.76681	-4.49786	9.99183	2.59822	1.60869	UP
comp18210_c0_seq1	388	17.5187	15.1903	1.17907	0.205746	3.89317	3.68743	0	15.5005	10.619		UP	UP
comp18213_c0_seq1	1081	16.7912	19.0706	74.5409	-0.183642	-2.15032	-1.96668	0	7.82654	6.86284		DOWN
comp18217_c0_seq1	829	23.0427	12.9362	1.16937	0.8329	4.30051	3.46761	0.34161	22.3833	9.36279		UP	UP
comp18239_c0_seq1	574	4.55195	12.3808	1.53319	-1.44355	1.56995	3.0135	0.466687	0.832712	8.38133			UP
comp18242_c0_seq1	617	7.39511	1e-05	0.0500889	19.4962	7.20594	-12.2903	5.95944	7.67291	0		UP
comp18292_c0_seq1	836	17.0579	1.46012	3.65089	3.54628	2.22412	-1.32216	9.0439	5.72705	0.15061	UP
comp18339_c0_seq1	517	10.8918	1e-05	1e-05	20.0548	20.0548	0	9.57451	11.311	0	UP	UP
comp18343_c0_seq2	1439	23.9999	11.2378	2.84203	1.09466	3.07803	1.98337	0.171765	9.24566	1.80268		UP
comp18359_c0_seq1	902	194.637	80.5683	3.90315	1.2725	5.64	4.3675	0	10.2984	5.22982		UP
comp18377_c0_seq1	1006	13.3744	17.3763	72.5281	-0.377647	-2.43907	-2.06142	0	8.69745	6.42761		DOWN
comp18382_c0_seq1	862	44.3552	0.173424	1.37083	7.99866	5.01598	-2.98268	15.6231	11.1962	0.227431	UP	UP
comp18387_c0_seq2	603	3.34764	5.22451	17.8939	-0.642152	-2.41825	-1.7761	0	8.64481	5.57963		DOWN
comp18389_c0_seq2	398	10.5776	35.8522	4.86666	-1.76105	1.12001	2.88106	2.07036	1.07183	10.3892			UP
comp18408_c0_seq2	3627	27.6089	35.986	208.729	-0.382299	-2.91842	-2.53612	0	11.2517	8.48092		DOWN	DOWN
comp18418_c0_seq1	1312	7.33211	1.2033	0.360379	2.60723	4.34664	1.73941	2.38174	7.95659	0		UP
comp18422_c0_seq1	2349	113.069	32.8996	0.72428	1.78106	7.28644	5.50538	0.891979	21.7325	10.3973		UP	UP
comp18470_c0_seq1	821	2854.35	13.8139	1.29184	7.6909	11.1095	3.41861	25.0961	40.6823	3.33702	UP	UP
comp18475_c0_seq1	904	36.1061	50.4916	324.594	-0.483803	-3.16833	-2.68452	0	20.018	14.9965		DOWN	DOWN
comp18509_c0_seq2	1209	6.25092	11.7878	116.294	-0.91515	-4.21757	-3.30242	0	25.7963	18.3532		DOWN	DOWN
comp18535_c0_seq2	280	12.9363	17.8522	88.1206	-0.464677	-2.76805	-2.30338	0	10.7326	7.77046		DOWN	DOWN
comp18543_c0_seq1	570	7.65715	1.5755	0.415246	2.281	4.20477	1.92377	3.65665	10.0942	0		UP
comp18564_c0_seq2	938	25.9823	0.0747718	0.226785	8.44082	6.84006	-1.60076	21.6493	20.6137	0	UP	UP
comp18616_c0_seq1	2017	23.6222	1e-05	0.195301	21.1717	6.9183	-14.2534	12.7244	12.1182	0	UP	UP
comp18618_c0_seq1	956	20.2425	4.13378	32.6097	2.29186	-0.687911	-2.97977	6.43238	0	11.625			DOWN
comp18623_c0_seq1	1592	11.4884	0.0694254	0.167806	7.3705	6.09724	-1.27326	8.90191	10.6635	0	UP	UP
comp18625_c0_seq1	1112	24.2519	12.5492	6.23547	0.950499	1.95953	1.00903	1.08246	8.54299	0.531493		UP
comp1863_c0_seq1	341	3.26071	7.65158	39.3921	-1.23057	-3.59464	-2.36408	0	21.0789	11.6712		DOWN	DOWN
comp18678_c0_seq1	2535	62.2207	57.8578	15.2734	0.104882	2.02638	1.92149	0	8.31598	5.02752		UP
comp18682_c0_seq2	237	4.12418	11.553	44.0652	-1.48608	-3.41746	-1.93138	0.101785	14.5746	5.1084		DOWN
comp18685_c0_seq1	1133	47.6298	2.40518	9.81499	4.30765	2.27881	-2.02884	15.082	6.15101	1.67016	UP
comp18687_c0_seq1	2175	16.3217	1e-05	0.0142091	20.6384	10.1658	-10.4726	14.9154	16.7209	0	UP	UP
comp18697_c0_seq1	228	10.1968	0.184134	0.136165	5.79122	6.22661	0.435395	11.0074	12.7786	0	UP	UP
comp18699_c0_seq1	823	6.0114	14.0427	100.575	-1.22405	-4.06443	-2.84038	0	21.5704	11.9347		DOWN	DOWN
comp18736_c0_seq1	1314	369.816	114.39	11.1889	1.69285	5.04667	3.35382	4.52585	39.185	15.6944		UP	UP
comp18740_c0_seq1	2838	30.8252	13.4128	0.538204	1.2005	5.83982	4.63932	0	11.9447	5.07706		UP
comp1875_c0_seq1	208	4.67475	2.08038	0.158613	1.16804	4.8813	3.71326	0.000494244	8.75517	1.44578		UP
comp18785_c0_seq1	1313	249.32	301.029	46.9958	-0.271906	2.40739	2.6793	0	11.0838	10.74		UP	UP
comp18790_c0_seq1	1669	20.2624	0.277192	0.693994	6.19177	4.86774	-1.32404	15.5443	15.2265	0	UP	UP
comp18812_c0_seq1	2152	52.9273	49.1623	4.78738	0.106459	3.4667	3.36024	0	19.081	15.4692		UP	UP
comp18815_c0_seq1	936	53.0379	48.3799	5.24354	0.132614	3.33841	3.2058	0	18.982	14.2993		UP	UP
comp18864_c0_seq1	1875	63.5857	33.0407	14.306	0.94446	2.15208	1.20762	0.772908	10.3598	1.51437		UP
comp18884_c0_seq1	1162	6.03436	9.84041	35.094	-0.705518	-2.53995	-1.83443	0	9.38381	4.907		DOWN
comp18889_c0_seq1	2505	29.6717	1e-05	0.0748566	21.5007	8.63074	-12.8699	17.0483	18.9146	0	UP	UP
comp18893_c0_seq2	1672	57.0748	57.0107	624.394	0.00162218	-3.45153	-3.45315	0	22.8895	24.0056		DOWN	DOWN
comp18894_c0_seq1	1479	489.536	473.912	125.097	0.0467968	1.96837	1.92157	0	8.40217	5.47708		UP
comp18902_c0_seq2	3703	85.0345	54.7604	3.31947	0.634915	4.67902	4.04411	0	28.3051	17.9536		UP	UP
comp18905_c0_seq1	1044	10.4473	27.0324	71.512	-1.37157	-2.77506	-1.4035	0.385989	11.7327	2.83142		DOWN
comp18917_c0_seq1	1055	9.92376	0.836605	0.440849	3.56827	4.49253	0.924262	5.46546	8.88623	0		UP
comp18920_c0_seq4	1564	21.0922	0.277903	1e-05	6.24599	21.0083	14.7623	23.0483	28.7917	0	UP	UP
comp18945_c0_seq1	936	2.93358	11.8923	42.9511	-2.01929	-3.87196	-1.85267	0.234845	8.06527	1.33422		DOWN
comp18955_c0_seq1	2515	12.9471	0.289288	9.33003	5.48398	0.472678	-5.0113	11.4208	0.109982	7.38753	UP
comp18962_c0_seq1	1562	18.9035	12.36	2.87339	0.612971	2.71783	2.10486	0	9.59576	3.25652		UP
comp18970_c0_seq3	1318	12.1137	10.6337	1.47728	0.187996	3.03563	2.84763	0	11.6173	7.14576		UP
comp18988_c0_seq1	2352	41.9993	31.1343	8.91329	0.431863	2.23634	1.80447	0	8.6853	3.55664		UP
comp19006_c0_seq5	1694	74.4899	25.3749	0.870438	1.55364	6.41916	4.86552	4.12586	42.3399	18.5194		UP	UP
comp1902_c0_seq1	581	11.6035	0.679225	9.33783	4.09453	0.313406	-3.78113	8.29334	0	5.71837	UP
comp19032_c0_seq2	862	146.253	204.476	1246.68	-0.483468	-3.09156	-2.60809	0	11.1229	8.01861		DOWN	DOWN
comp19033_c0_seq3	3436	18.7511	0.620629	0.382688	4.9171	5.61466	0.69756	11.752	15.5968	0	UP	UP
comp19054_c0_seq1	1103	7.91206	7.37456	0.70525	0.101497	3.48785	3.38635	0	9.39929	6.25752		UP
comp1908_c0_seq1	733	2.7234	7.4738	24.2061	-1.45643	-3.15189	-1.69546	0	13.3984	4.57227		DOWN
comp19113_c0_seq1	1078	25.4675	0.781435	1e-05	5.02639	21.2802	16.2538	20.3533	28.2968	0	UP	UP
comp19116_c0_seq1	4350	42.9076	0.106389	0.200036	8.65575	7.74483	-0.910914	25.1164	24.2614	0	UP	UP
comp19120_c0_seq4	1547	30.391	12.3646	1.45195	1.29743	4.38758	3.09015	3.09966	28.6645	8.19857		UP	UP
comp19128_c0_seq1	1129	55.2759	38.0254	4.86652	0.539685	3.50569	2.966	0	21.9249	12.2714		UP	UP
comp19147_c0_seq1	509	10.306	2.20117	31.6467	2.22715	-1.61857	-3.84571	1.6798	1.33873	9.55752			DOWN
comp19159_c0_seq2	492	14.3035	1e-05	1e-05	20.4479	20.4479	0	22.5969	24.8232	0	UP	UP
comp19200_c0_seq4	1513	48.0636	7.16762	2.36185	2.74538	4.34696	1.60158	5.14045	14.178	0.524106		UP
comp19204_c0_seq1	917	7.67412	0.40791	0.0337021	4.23368	7.83102	3.59734	5.93619	10.0985	0		UP
comp19211_c0_seq5	2632	41.6575	22.2264	9.98532	0.906302	2.0607	1.15439	0.771668	9.41692	1.18562		UP
comp19221_c0_seq2	674	10.5599	4.20113	24.1089	1.32974	-1.19097	-2.52072	1.28455	1.95962	11.3856			DOWN
comp19228_c0_seq1	932	5.15083	1e-05	1e-05	18.9744	18.9744	0	6.12707	7.85138	0		UP
comp19238_c0_seq1	1105	32.5464	1.24288	10.7701	4.71074	1.59547	-3.11527	17.7931	3.49728	5.1961	UP
comp19263_c0_seq1	759	2.70998	14.0571	137.346	-2.37494	-5.66339	-3.28845	2.16824	35.2562	16.293		DOWN	DOWN
comp19276_c0_seq1	851	27.8693	41.0207	121.712	-0.557673	-2.12672	-1.56905	0	8.07209	4.4657		DOWN
comp19281_c0_seq1	1131	9.60495	19.7214	49.2247	-1.03792	-2.35753	-1.31962	0	9.9659	2.95921		DOWN
comp19297_c0_seq2	1208	119.973	33.4916	1.01059	1.84084	6.89137	5.05053	4.37697	39.8591	17.2224		UP	UP
comp19321_c0_seq2	1644	6.08416	3.38725	115.71	0.844943	-4.24931	-5.09426	0	15.2545	19.454		DOWN	DOWN
comp19368_c0_seq1	717	13.3657	0.243087	0.213391	5.78092	5.9689	0.187975	9.98122	11.7591	0	UP	UP
comp19389_c0_seq2	2816	52.1387	30.7188	194.949	0.763232	-1.90267	-2.6659	0	6.40358	13.5429			DOWN
comp19404_c0_seq1	1074	8.27892	15.649	89.0514	-0.918559	-3.42712	-2.50857	0	9.52541	5.25761		DOWN
comp19409_c0_seq1	1423	5.87553	12.6938	119.795	-1.11133	-4.34971	-3.23837	0	22.9485	14.7407		DOWN	DOWN
comp19414_c0_seq1	1470	10.9925	15.2969	279.394	-0.476726	-4.66771	-4.19099	0	31.8364	27.6536		DOWN	DOWN
comp19454_c0_seq1	2490	24.5168	4.404	2.06554	2.47688	3.56918	1.09229	9.43699	18.6798	0.0828533	UP	UP
comp19457_c0_seq1	1163	8.19848	0.263778	0.650321	4.95796	3.65613	-1.30183	7.79034	7.66093	0	UP	UP
comp19473_c0_seq1	667	7.07172	3.28947	27.3955	1.10421	-1.95381	-3.05802	0	3.19655	9.02556			DOWN
comp19483_c0_seq1	762	9.64315	0.359804	0.905288	4.74422	3.41306	-1.33116	8.1263	6.61922	0	UP
comp19484_c0_seq1	1350	4.18098	1.21258	84.3123	1.78576	-4.33383	-6.11959	0.324693	19.9802	30.7118		DOWN	DOWN
comp19499_c0_seq1	602	12.9018	0.25889	3.71092	5.63909	1.79773	-3.84136	14.9692	4.38794	2.22192	UP
comp19533_c1_seq1	1110	466.581	163.83	7.42811	1.50993	5.97299	4.46306	0	9.89128	4.616		UP
comp19609_c0_seq1	647	14.3426	7.49686	1.31705	0.93595	3.44492	2.50897	0.643939	13.4729	3.25652		UP
comp19612_c0_seq1	1768	22.629	1.32759	0.367463	4.09129	5.94443	1.85313	14.4265	22.2696	0	UP	UP
comp19616_c0_seq1	1262	15.6085	24.9356	123.55	-0.675879	-2.9847	-2.30882	0	16.1849	10.089		DOWN	DOWN
comp19619_c0_seq1	646	99.6892	0.506658	0.143521	7.62028	9.44003	1.81975	9.64055	14.4848	0	UP	UP
comp1962_c0_seq1	482	4.95262	9.85131	28.7991	-0.992124	-2.53976	-1.54764	0	12.3263	4.96114		DOWN
comp19656_c0_seq2	1788	9.24017	2.746	1.03867	1.75059	3.15318	1.40259	2.34636	8.6853	0.0541001		UP
comp19693_c0_seq2	1175	32.8168	29.4139	1.66489	0.157939	4.30094	4.143	0	23.9852	18.6884		UP	UP
comp19695_c0_seq1	1270	32.9316	16.6648	1.21165	0.982663	4.76442	3.78176	1.05301	30.2954	13.7021		UP	UP
comp19702_c0_seq2	308	11.9182	8.9283	176.645	0.416707	-3.88962	-4.30632	0	20.0711	24.009		DOWN	DOWN
comp19703_c0_seq1	1103	5.21737	0.0211955	0.0544014	7.94342	6.58354	-1.35988	7.18254	8.90836	0		UP
comp19707_c0_seq1	725	5.45407	9.30009	0.732481	-0.769913	2.89647	3.66638	0	4.99426	8.92458			UP
comp19713_c0_seq1	849	10.3951	2.55259	0.0342754	2.02587	8.24451	6.21864	3.40218	16.585	2.27505		UP
comp19738_c0_seq6	1844	300.112	138.184	15.5049	1.11891	4.2747	3.15579	1.57876	32.4548	15.2154		UP	UP
comp19756_c0_seq1	723	11.6411	0.168054	0.654125	6.11416	4.15352	-1.96064	14.4524	11.1082	0	UP	UP
comp19758_c0_seq1	2147	16.0681	0.326652	0.379504	5.6203	5.40394	-0.21636	8.2912	10.0246	0	UP	UP
comp1976_c0_seq1	254	9.55229	19.9365	120.243	-1.06149	-3.65396	-2.59247	0	21.0789	11.8261		DOWN	DOWN
comp19776_c0_seq1	927	12.268	0.758938	0.0333386	4.01477	8.52349	4.50872	12.7244	19.827	0	UP	UP
comp19789_c0_seq1	500	14.5434	17.438	158.047	-0.261866	-3.44191	-3.18004	0	21.2401	18.7247		DOWN	DOWN
comp19791_c1_seq1	691	12.5409	1e-05	1e-05	20.2582	20.2582	0	14.8134	16.6133	0	UP	UP
comp19793_c0_seq2	2011	13.1008	9.71244	71.3799	0.431746	-2.44587	-2.87761	0	6.15101	9.02403			DOWN
comp1980_c0_seq1	350	9.45233	11.653	0.847223	-0.301961	3.47986	3.78182	0	9.74089	9.89664		UP	UP
comp19802_c0_seq1	1105	11.0579	3.88296	1.45164	1.50985	2.92932	1.41948	1.7503	9.00849	0.278078		UP
comp19816_c0_seq3	1361	28.5842	20.5915	4.26078	0.473166	2.74603	2.27286	0	9.2203	4.00246		UP
comp1983_c0_seq1	342	13.9929	12.8102	1.05305	0.127398	3.73205	3.60465	0	12.5947	9.18561		UP	UP
comp19857_c0_seq1	1015	8.10581	1e-05	1e-05	19.6286	19.6286	0	6.07461	7.79529	0		UP
comp19859_c0_seq1	596	16.3388	8.91996	3.16893	0.873191	2.36623	1.49304	0.216007	8.57221	1.23426		UP
comp19880_c0_seq2	1931	13.4941	0.264615	1.02564	5.6723	3.71774	-1.95455	10.626	8.99223	0	UP	UP
comp19932_c0_seq1	1385	210.709	86.243	1.80337	1.28877	6.86842	5.57964	1.57814	46.8387	28.8033		UP	UP
comp19935_c1_seq6	3041	87.7994	83.374	10.4456	0.0746139	3.07131	2.9967	0	11.4085	8.74279		UP	UP
comp19941_c0_seq1	1420	30.2158	24.4953	7.48713	0.302798	2.01282	1.71002	0	8.90943	4.0153		UP
comp19944_c0_seq1	598	414.528	128.025	10.7294	1.69505	5.27182	3.57678	2.52439	29.1302	11.8119		UP	UP
comp19946_c0_seq1	2157	156.176	35.0779	0.719142	2.15454	7.76268	5.60814	6.02676	46.904	20.8001		UP	UP
comp19983_c0_seq1	1630	12.2597	27.4688	79.9945	-1.16387	-2.70598	-1.54211	0.031644	12.5862	3.87087		DOWN
comp19994_c0_seq1	952	136.062	24.487	31.5004	2.47418	2.11083	-0.363357	7.65297	7.05333	0	UP
comp20051_c0_seq1	529	27.3175	3.23347	0.755581	3.07867	5.1761	2.09742	3.52608	10.3431	0.224557		UP
comp20123_c0_seq2	2540	67.5542	36.7231	2.44866	0.879356	4.78598	3.90663	0	21.5814	11.7265		UP	UP
comp20124_c0_seq1	678	3.67567	2.79442	59.5223	0.395459	-4.01735	-4.41281	0	13.331	15.3194		DOWN	DOWN
comp20135_c0_seq1	1669	110.101	93.0001	23.8166	0.243529	2.20879	1.96526	0	12.2171	6.82198		UP
comp20144_c0_seq1	2157	4.78451	9.90932	46.3555	-1.05042	-3.2763	-2.22588	0	9.58313	4.58982		DOWN
comp20161_c0_seq1	908	23.098	34.537	221.369	-0.580378	-3.26062	-2.68024	0	21.9405	15.927		DOWN	DOWN
comp20163_c0_seq3	451	11.2863	8.8325	0.56708	0.353674	4.31487	3.9612	0	15.2509	8.20871		UP	UP
comp20188_c0_seq12	3443	45.4434	4.4039	0.35812	3.36722	6.98748	3.62027	17.6053	36.9379	2.4435	UP	UP
comp20198_c0_seq3	376	15.4897	2.05489	10.651	2.91418	0.540313	-2.37386	9.19463	0.141594	5.12078	UP
comp20200_c0_seq1	1591	5.32809	3.68724	45.5017	0.531076	-3.09423	-3.62531	0	14.8097	20.6614		DOWN	DOWN
comp20206_c0_seq2	1171	193.172	163.142	23.4614	0.24376	3.04153	2.79776	0	10.6841	6.6227		UP
comp20208_c0_seq2	597	6.30165	7.10256	43.3285	-0.172608	-2.78152	-2.60891	0	14.032	13.642		DOWN	DOWN
comp20214_c0_seq2	1900	63.8397	56.1014	16.4573	0.186418	1.95573	1.76931	0	8.57221	4.51421		UP
comp20235_c0_seq1	2469	326.296	176.653	85.1547	0.885261	1.93802	1.05276	0.687932	9.27982	1.24652		UP
comp20243_c0_seq1	516	4.02079	28.5163	31.9453	-2.82624	-2.99006	-0.16382	8.17627	11.7863	0	DOWN	DOWN
comp20257_c0_seq1	1126	11.3926	14.1084	93.9138	-0.308456	-3.04324	-2.73478	0	15.7181	13.5922		DOWN	DOWN
comp20273_c0_seq1	872	136.026	19.3619	0.0756687	2.81259	10.8119	7.99931	11.0839	50.7267	18.2748	UP	UP	UP
comp20275_c0_seq2	1227	113.545	29.7662	8.17633	1.93152	3.79567	1.86415	7.72942	27.5234	3.7193	UP	UP
comp20278_c0_seq1	1154	26.0746	31.7711	430.208	-0.285069	-4.04432	-3.75925	0	29.8319	27.1277		DOWN	DOWN
comp20316_c0_seq1	1204	9.13556	21.1311	149.326	-1.2098	-4.03083	-2.82103	0	23.7883	13.3728		DOWN	DOWN
comp20329_c0_seq1	2365	62.4158	33.4332	5.45601	0.90063	3.51599	2.61536	0.385989	20.3833	8.15824		UP	UP
comp20332_c0_seq1	1500	13.0167	0.179236	0.074292	6.18236	7.45294	1.27059	10.4083	14.9801	0	UP	UP
comp20334_c0_seq2	432	9.88679	0.0721525	1e-05	7.09831	19.9151	12.8168	11.2845	13.0646	0	UP	UP
comp2034_c0_seq1	350	4.12069	7.29462	29.8681	-0.823949	-2.85765	-2.0337	0	9.85673	4.59504		DOWN
comp20343_c0_seq2	1937	65.0723	45.3509	3.71152	0.520914	4.13196	3.61105	0	21.6904	13.5922		UP	UP
comp20354_c0_seq1	1876	20.9623	17.4785	2.07299	0.262217	3.33801	3.07579	0	14.8996	8.93741		UP	UP
comp20394_c0_seq1	435	28.3514	0.053744	0.0758427	9.0431	8.5462	-0.496906	19.1508	21.0324	0	UP	UP
comp20396_c0_seq1	1618	23.8	45.8651	143.019	-0.946433	-2.58717	-1.64073	0	10.937	4.18861		DOWN
comp20404_c0_seq2	1611	9.82815	1e-05	0.0180632	19.9066	9.08772	-10.8188	6.50992	8.26794	0		UP
comp20412_c0_seq1	651	12.0923	8.68219	1.55368	0.477961	2.96033	2.48237	0	8.77049	3.21253		UP
comp20414_c0_seq2	1591	15.9793	39.807	1689.72	-1.31681	-6.72443	-5.40762	0.171765	58.9104	44.2193		DOWN	DOWN
comp20422_c0_seq1	1391	6.12187	1e-05	0.0209201	19.2236	8.19294	-11.0307	7.10255	8.8093	0		UP
comp20432_c0_seq1	1139	38.8353	50.6889	248.593	-0.384301	-2.67834	-2.29404	0	7.91868	5.88229		DOWN
comp20448_c0_seq1	705	14.0538	6.342	0.4566	1.14795	4.94388	3.79593	1.01624	17.0027	5.13219		UP
comp2046_c0_seq1	377	12.0907	0.826807	0.405838	3.87021	4.89685	1.02665	5.74817	9.0713	0		UP
comp20488_c0_seq1	2084	129.341	42.3343	22.6342	1.61127	2.5146	0.903327	1.7793	8.13012	0.282909		UP
comp20495_c0_seq1	1788	15.1467	6.64218	0.551637	1.18928	4.77914	3.58987	0.908914	17.458	3.94733		UP
comp20497_c0_seq2	2007	15.5624	9.04558	1.13232	0.782783	3.78071	2.99793	0.054151	16.7828	6.16813		UP
comp20512_c0_seq3	935	11.4447	3.60491	1e-05	1.66665	20.1263	18.4596	1.69775	16.1507	3.20365		UP
comp20515_c0_seq1	316	6.84911	1.18042	0.440547	2.53661	3.95855	1.42194	3.26582	8.01731	0		UP
comp20530_c0_seq2	1225	14.3137	0.106843	0.0504569	7.06576	8.14813	1.08237	10.1061	11.8971	0	UP	UP
comp20533_c0_seq1	1726	30.9691	0.0541771	0.0695304	9.15893	8.79897	-0.35996	21.9166	24.0266	0	UP	UP
comp20534_c0_seq1	1409	16.4161	1.01874	0.519467	4.01026	4.98193	0.971676	11.454	17.3717	0	UP	UP
comp20542_c0_seq1	445	11.5435	3.05164	0.173623	1.91943	6.05498	4.13555	2.50096	13.7968	1.30446		UP
comp20558_c0_seq2	841	8.20129	0.0332798	399.61	7.94506	-5.6066	-13.5517	6.49894	20.3743	40.5346		DOWN	DOWN
comp20598_c0_seq1	1877	60.1196	49.528	5.97881	0.279591	3.32991	3.05032	0	17.4672	11.5977		UP	UP
comp20615_c0_seq2	1598	10.8491	11.8699	1.17347	-0.129732	3.20872	3.33845	0	9.16529	7.78658		UP	UP
comp20635_c0_seq5	938	3.29744	6.05106	24.4604	-0.87584	-2.89103	-2.01519	0	12.0121	6.72972		DOWN
comp20650_c0_seq1	1971	23.0137	1.59991	1.53633	3.84643	3.90494	0.0585103	19.8161	21.7059	0	UP	UP
comp2066_c0_seq1	427	27.6085	3.54759	1e-05	2.9602	21.3967	18.4365	10.2693	27.6044	2.98964	UP	UP
comp20670_c0_seq1	1388	13.2618	0.224102	0.214734	5.88698	5.94858	0.0616011	18.1048	16.7266	0	UP	UP
comp20684_c0_seq2	967	11.4781	38.1823	579.459	-1.73402	-5.65775	-3.92373	1.19923	39.1539	22.6062		DOWN	DOWN
comp20710_c0_seq1	1094	13.8606	2.89544	0.0830983	2.25914	7.38195	5.12282	3.3412	16.0969	1.91749		UP
comp20728_c0_seq1	974	9.54404	18.7918	79.3497	-0.977434	-3.05555	-2.07812	0	13.0717	5.99713		DOWN
comp20763_c0_seq1	1496	6.10537	0.0781372	0.0206583	6.28792	8.20721	1.91929	6.90817	8.63489	0		UP
comp20771_c0_seq1	1432	17.3891	38.702	219.782	-1.15423	-3.65982	-2.5056	0.121032	24.634	12.3407		DOWN	DOWN
comp20806_c0_seq1	2292	10.8007	4.19482	1.40652	1.36444	2.94092	1.57648	2.34636	10.8179	0.622135		UP
comp20860_c0_seq2	1407	19.7923	11.1075	313.66	0.833409	-3.98619	-4.8196	0	16.5171	23.757		DOWN	DOWN
comp20866_c0_seq1	1097	6.96415	0.119163	1e-05	5.86893	19.4096	13.5407	9.05622	10.8233	0	UP	UP
comp20874_c0_seq1	282	4.53095	3.86942	63.9012	0.227695	-3.81796	-4.04565	0	9.98007	11.4645		DOWN	DOWN
comp20882_c0_seq1	2417	5.97886	16.0581	143.666	-1.42536	-4.58671	-3.16135	0	25.8654	14.4173		DOWN	DOWN
comp20889_c0_seq1	1478	11.9668	22.0258	53.7558	-0.880164	-2.16739	-1.28722	0	8.70532	2.73645		DOWN
comp20910_c0_seq1	1581	6.25055	1e-05	0.0195477	19.2536	8.32084	-10.9328	6.664	8.40348	0		UP
comp20925_c0_seq1	838	206.04	60.4279	26.1883	1.76963	2.97593	1.20629	4.32257	15.3971	1.12663		UP
comp20930_c0_seq2	1754	38.2387	67.8046	164.476	-0.826348	-2.10477	-1.27842	0	9.30315	3.14533		DOWN
comp20935_c0_seq1	961	15.6699	8.26176	1.16617	0.923477	3.74814	2.82467	0.264557	14.8382	4.46926		UP
comp20937_c0_seq1	254	2.91236	4.09688	24.7429	-0.492335	-3.08675	-2.59442	0	8.06601	5.9273		DOWN
comp20959_c0_seq1	1586	11.8578	15.6703	50.9835	-0.4022	-2.1042	-1.702	0	8.04984	5.53863		DOWN
comp20964_c1_seq1	1008	29610	11397.9	904.005	1.37732	5.03361	3.6563	1.88556	37.4404	19.5083		UP	UP
comp20974_c0_seq1	1278	16.4993	12.5697	0.213844	0.392462	6.26971	5.87725	0	11.879	7.7914		UP	UP
comp21003_c0_seq1	513	16.6008	63.3369	372.069	-1.93179	-4.48624	-2.55445	3.09966	32.3144	11.872		DOWN	DOWN
comp21069_c0_seq1	739	11.3221	10.7221	284.874	0.0785543	-4.6531	-4.73166	0	31.9796	33.1539		DOWN	DOWN
comp2111_c0_seq1	1175	14.8389	11.2008	2.26856	0.40578	2.70954	2.30376	0	10.9259	4.70121		UP
comp21112_c0_seq3	420	3.26676	7.64842	27.4946	-1.2273	-3.07322	-1.84592	0	15.2383	6.88255		DOWN
comp21147_c0_seq2	993	11.8785	0.596403	1e-05	4.31592	20.1799	15.864	14.6265	19.7408	0	UP	UP
comp21152_c0_seq1	1876	194.171	248.968	23.7559	-0.358631	3.03098	3.38961	0	12.8561	12.9287		UP	UP
comp21174_c0_seq1	1116	264.933	0.506297	0.33332	9.03143	9.6345	0.603075	39.8073	42.9503	0	UP	UP
comp2118_c0_seq1	1280	12.3928	1e-05	1e-05	20.2411	20.2411	0	14.5532	16.3489	0	UP	UP
comp21180_c0_seq2	702	6.67465	4.28157	37.5953	0.640554	-2.49379	-3.13434	0	7.51108	11.2655			DOWN
comp21183_c0_seq7	2376	32.9589	21.68	7.73054	0.604301	2.09203	1.48773	0	9.02633	2.37427		UP
comp21202_c0_seq1	631	8.57719	0.488938	0.87614	4.13278	3.29127	-0.84151	8.19159	8.0188	0	UP	UP
comp2123_c0_seq1	360	9.23659	3.2296	0.945647	1.51601	3.28799	1.77198	1.2744	7.94369	0.220406		UP
comp21230_c0_seq1	2520	75.6025	64.3833	504.334	0.231747	-2.73787	-2.96962	0	15.5016	19.5439		DOWN	DOWN
comp21231_c0_seq1	2417	188.14	161.306	54.8482	0.22201	1.77829	1.55628	0	7.65265	3.63544		UP
comp21253_c0_seq1	1382	5.75981	1e-05	1e-05	19.1357	19.1357	0	7.51757	9.24426	0		UP
comp21344_c0_seq1	1880	7.21056	1e-05	1e-05	19.4598	19.4598	0	8.73906	10.4766	0	UP	UP
comp21351_c0_seq1	1673	8.11224	0.204557	0.413865	5.30953	4.29287	-1.01666	10.788	9.82783	0	UP	UP
comp21379_c0_seq1	325	9.57411	0.179836	0.142638	5.73439	6.06871	0.334323	5.33856	9.22773	0		UP
comp21382_c0_seq1	1499	15.067	27.8838	241.808	-0.888036	-4.0044	-3.11637	0	30.3983	20.574		DOWN	DOWN
comp21392_c0_seq2	387	7.19079	4.1313	41.6817	0.799553	-2.53519	-3.33475	0	9.00849	15.5661		DOWN	DOWN
comp21448_c0_seq1	1546	5.09152	8.77747	39.3424	-0.785709	-2.94992	-2.16421	0	11.9012	7.28928		DOWN
comp21450_c0_seq1	1642	6.52119	25.4216	2226.81	-1.96285	-8.41563	-6.45278	1.74991	72.0627	51.9141		DOWN	DOWN
comp21483_c0_seq1	965	17.1405	8.12192	2.4179	1.07752	2.82558	1.74807	1.03254	12.1098	1.78032		UP
comp21498_c0_seq2	1081	7.94354	1.90736	0.813116	2.0582	3.28825	1.23004	3.56052	9.37898	0		UP
comp21515_c0_seq1	864	15.637	34.6811	120.549	-1.14918	-2.94658	-1.7974	0.0173331	15.2892	5.92815		DOWN
comp21534_c0_seq1	2382	18.7138	73.9377	85.5187	-1.98221	-2.19213	-0.209929	4.74189	8.76773	0		DOWN
comp21547_c0_seq2	1866	32.968	39.7481	412.124	-0.269819	-3.64394	-3.37412	0	27.2614	24.5075		DOWN	DOWN
comp21559_c0_seq2	1670	8.16898	0.670034	606.97	3.60785	-6.21533	-9.82318	5.19931	48.5171	75.7399		DOWN	DOWN
comp21581_c0_seq1	1788	6.78425	0.0305081	1e-05	7.79685	19.3718	11.575	7.61861	9.35529	0		UP
comp21589_c0_seq2	916	20.0943	0.437773	0.527629	5.52046	5.25111	-0.269342	12.5659	12.4086	0	UP	UP
comp21596_c0_seq7	1965	33.6505	19.9033	1.4593	0.757619	4.52728	3.76967	0.238434	27.6877	14.2183		UP	UP
comp21601_c0_seq6	1019	21.0469	2.3175	1.24562	3.18297	4.07867	0.895702	10.1061	14.4652	0	UP	UP
comp21626_c0_seq1	1559	7.79977	0.039987	0.039647	7.60776	7.62008	0.0123194	11.936	13.7293	0	UP	UP
comp21643_c0_seq2	1603	8.52839	0.01746	0.0750412	8.93208	6.82845	-2.10363	11.6407	13.4053	0	UP	UP
comp21649_c0_seq1	1458	106.022	82.4419	4.85017	0.362917	4.45019	4.08727	0	26.1098	18.7052		UP	UP
comp21677_c0_seq1	1641	16.5131	21.6188	94.9426	-0.388677	-2.52345	-2.13477	0	12.2474	9.22174		DOWN	DOWN
comp21684_c0_seq5	721	19.6377	63.9641	146.659	-1.70364	-2.90077	-1.19713	1.55949	11.9767	1.60905		DOWN
comp21691_c0_seq1	1527	57.6514	102.182	17.2982	-0.825716	1.73673	2.56245	0	4.55848	8.07909			UP
comp21714_c0_seq1	1051	36.9138	0.331676	0.272857	6.79824	7.07987	0.281631	30.856	33.0901	0	UP	UP
comp21716_c0_seq3	1645	25.7123	21.3714	3.92274	0.266778	2.71253	2.44575	0	14.4459	8.19294		UP	UP
comp21758_c0_seq5	2190	22.9855	23.0959	1.23658	-0.00691721	4.21629	4.22321	0	19.7543	16.9182		UP	UP
comp21764_c0_seq2	1170	11.4686	10.2028	55.8748	0.16873	-2.2845	-2.45323	0	7.85115	9.37377		DOWN	DOWN
comp21783_c0_seq2	814	86.7721	0.0343837	0.109465	11.3013	9.63062	-1.67067	31.4439	33.9152	0	UP	UP
comp2184_c0_seq1	715	8.1825	0.195954	0.10301	5.38396	6.31169	0.927728	4.89977	8.82367	0		UP
comp2186_c0_seq1	703	14.9194	2.51887	0.18884	2.56634	6.30388	3.73754	4.25033	14.8601	0.539933		UP
comp21879_c0_seq1	1031	8.39528	1e-05	1e-05	19.6792	19.6792	0	6.20359	7.9228	0		UP
comp21907_c0_seq1	639	7.81938	5.7344	0.0455397	0.447413	7.42379	6.97637	0	11.4025	6.40809		UP
comp21909_c0_seq1	1946	12.2868	3.63286	0.423721	1.75793	4.85785	3.09992	4.29169	17.6938	1.90074		UP
comp21921_c0_seq2	1204	40.3003	3.41804	0.805559	3.55955	5.64466	2.08511	5.8803	12.7703	0.094317		UP
comp21927_c0_seq1	1364	14.5104	0.492948	0.281276	4.87951	5.68896	0.809449	6.45672	8.19815	0		UP
comp21928_c0_seq1	1098	234.301	107.635	12.3546	1.12222	4.24524	3.12302	0.363598	19.4852	8.52101		UP	UP
comp21962_c0_seq1	1417	226.156	1.19288	1.18228	7.56672	7.5796	0.0128835	38.7282	41.2642	0	UP	UP
comp21970_c0_seq1	1558	24.7698	0.508312	0.144211	5.60672	7.42425	1.81753	15.4816	20.1959	0	UP	UP
comp21993_c0_seq1	1001	12.729	12.7674	2.28377	-0.004349	2.47863	2.48298	0	9.63259	7.12516		UP
comp22007_c0_seq1	1641	24.0701	13.7534	1.38315	0.807454	4.12121	3.31376	0	17.3655	7.44151		UP
comp22008_c0_seq3	1029	11.981	13.9397	131.7	-0.218461	-3.45844	-3.23998	0	21.1074	20.2204		DOWN	DOWN
comp22021_c0_seq3	986	5.95591	0.0158062	0.232903	8.55769	4.67652	-3.88116	10.109	9.05588	0	UP	UP
comp22039_c0_seq7	1771	16.3256	7.14323	2.32862	1.19249	2.80959	1.6171	1.10804	9.9182	0.942066		UP
comp22059_c0_seq1	635	10.3481	28.062	71.4397	-1.43925	-2.78736	-1.34811	0.54822	11.5485	2.48789		DOWN
comp22071_c0_seq1	1600	29.339	0.951355	0.0386311	4.94669	9.56884	4.62215	30.5265	39.3857	0.0545584	UP	UP
comp22082_c0_seq1	1164	38.421	8.44716	2.29583	2.18535	4.06481	1.87945	7.04926	20.9813	1.48251		UP
comp22096_c0_seq9	1844	5.16141	7.36106	27.7638	-0.512148	-2.42737	-1.91522	0	7.86334	5.17167		DOWN
comp22098_c0_seq2	2386	12.1569	1.44124	0.689758	3.07639	4.13954	1.06315	6.41609	11.0918	0		UP
comp22115_c0_seq3	869	21.3445	59.9738	104.065	-1.49047	-2.28555	-0.795083	1.2744	8.88623	0.678383		DOWN
comp22121_c0_seq1	513	10.4481	2.31387	0.896776	2.17486	3.54235	1.36749	3.81333	10.1811	0		UP
comp22124_c0_seq1	2558	37.6482	34.5279	4.32453	0.124816	3.12197	2.99715	0	12.0231	8.35791		UP	UP
comp22133_c0_seq1	1760	15.2142	17.0613	2.43627	-0.165306	2.64268	2.80798	0	9.44065	8.39662		UP	UP
comp22147_c0_seq1	1169	12.6374	7.32609	53.2586	0.786585	-2.07531	-2.8619	0	4.01886	7.99978			DOWN
comp22153_c0_seq3	1619	62.1415	16.3271	1.00299	1.92829	5.95318	4.02489	1.91531	19.2435	5.85994		UP
comp22168_c0_seq2	2051	27.4257	20.4837	2.98717	0.421055	3.19868	2.77762	0	16.7682	8.88972		UP	UP
comp22177_c0_seq2	1555	13.2293	4.02574	0.0374275	1.71641	8.46542	6.74901	3.75573	22.0014	4.07273		UP
comp22202_c0_seq4	439	13.3664	10.3509	54.3075	0.36886	-2.02254	-2.3914	0	6.40258	9.96856			DOWN
comp22227_c0_seq1	1320	22.6168	10.3502	4.11364	1.12773	2.45891	1.33118	1.02238	8.53293	0.623267		UP
comp22230_c0_seq4	1831	184.875	79.6776	2.94629	1.21431	5.97151	4.7572	0.0518819	24.8884	14.7909		UP	UP
comp22266_c0_seq2	781	17.0685	1.0395	0.484376	4.03738	5.13907	1.10169	14.197	20.5129	0	UP	UP
comp22277_c0_seq1	753	23.6925	12.421	6.19404	0.93165	1.93548	1.00383	1.01815	7.70689	0.489159		UP
comp22283_c0_seq1	496	18.4305	1.9276	0.319955	3.25722	5.84808	2.59087	12.4457	22.2876	0.0779707	UP	UP
comp22317_c0_seq1	1096	8.629	0.0575331	0.185009	7.22866	5.54352	-1.68513	8.00891	9.73272	0	UP	UP
comp22323_c0_seq4	2367	8.58431	5.27622	0.738967	0.702198	3.53812	2.83592	0	9.80489	3.03975		UP
comp22330_c0_seq1	898	17.7266	6.41054	0.535818	1.4674	5.04803	3.58063	2.62984	23.4333	5.66172		UP
comp22334_c0_seq2	1028	176.12	14.067	0.620627	3.64618	8.14862	4.50244	10.7956	33.1796	6.72972	UP	UP
comp22350_c0_seq6	862	8.56905	0.193158	0.934417	5.47128	3.197	-2.27429	7.79125	4.60188	0.0144591	UP
comp22368_c0_seq1	2802	13.1101	16.8125	88.121	-0.358853	-2.74881	-2.38995	0	14.2443	11.5715		DOWN	DOWN
comp22377_c0_seq1	3602	11.2049	20.1882	63.7754	-0.849387	-2.50887	-1.65949	0	11.4256	4.95559		DOWN
comp22385_c0_seq3	1233	21.0646	13.8907	5.95805	0.6007	1.82191	1.22121	0	7.68688	1.5085		UP
comp22402_c0_seq5	818	27.9738	35.654	134.028	-0.349986	-2.26038	-1.9104	0	10.3533	8.00608		DOWN	DOWN
comp22408_c0_seq3	1433	10.9353	6.18607	1.88378	0.821899	2.53729	1.71539	0.263732	8.3301	1.00378		UP
comp22417_c0_seq2	796	9.27699	4.09677	0.778274	1.17917	3.57531	2.39614	0.845563	12.0171	1.84565		UP
comp22449_c0_seq4	1174	14.327	131.58	459.17	-3.19914	-5.00222	-1.80308	10.7157	31.2229	4.14448	DOWN	DOWN
comp22450_c0_seq1	2171	75.2708	68.4727	3.86616	0.136562	4.28312	4.14655	0	22.7215	18.4606		UP	UP
comp22460_c0_seq4	1291	17.2384	2.15232	0.115717	3.00167	7.21888	4.21722	9.97318	23.8716	1.22911	UP	UP
comp22465_c1_seq4	1870	4086.72	3881.64	200.098	0.0742796	4.35217	4.27789	0	29.4867	25.3503		UP	UP
comp22466_c0_seq7	1277	67.7314	0.720492	0.316776	6.5547	7.74022	1.18552	22.1003	26.4417	0	UP	UP
comp22488_c0_seq1	522	21.4979	1.44588	0.158006	3.89418	7.08808	3.1939	3.95988	10.8095	0.191827		UP
comp22489_c0_seq1	1610	8.97208	0.642625	0.108343	3.80339	6.37177	2.56837	7.12801	13.6634	0		UP
comp22524_c0_seq1	976	6.59191	0.113243	0.0636183	5.8632	6.69511	0.83191	7.56025	9.29459	0		UP
comp22555_c0_seq1	4330	44.6632	46.5127	1.66641	-0.0585383	4.74427	4.80281	0	20.5483	18.4915		UP	UP
comp22559_c0_seq1	832	81.3821	60.8426	5.08307	0.419631	4.00094	3.58131	0	15.4388	9.74872		UP	UP
comp22567_c0_seq2	1331	14.503	12.8814	254.905	0.171055	-4.13554	-4.30659	0	33.0901	36.594		DOWN	DOWN
comp22609_c0_seq1	2287	8.71448	0.0408896	0.0135133	7.73553	9.33289	1.59736	8.89335	10.6509	0	UP	UP
comp22614_c0_seq2	2024	7.39117	1e-05	1e-05	19.4954	19.4954	0	6.88049	8.60809	0		UP
comp22616_c1_seq1	1464	21.9084	7.71232	1.35301	1.50625	4.01724	2.51099	4.53203	22.9199	3.67642		UP
comp22629_c0_seq1	1753	16.8297	4.74812	1.33589	1.82558	3.65513	1.82956	1.32651	7.74651	0.318872		UP
comp22636_c0_seq1	1202	297.305	129.196	28.1328	1.20238	3.40162	2.19924	0.608347	14.3075	4.26029		UP
comp22637_c0_seq2	1205	8.84557	25.4363	208.075	-1.52386	-4.556	-3.03214	0.614097	28.0014	14.3377		DOWN	DOWN
comp22657_c0_seq2	1493	54.3922	1e-05	0.0620995	22.375	9.7746	-12.6004	16.3301	18.2279	0	UP	UP
comp22666_c0_seq3	1897	7.21527	0.158909	0.1787	5.50478	5.33544	-0.169339	9.65731	11.4085	0	UP	UP
comp22677_c0_seq1	1951	10.0911	0.510843	0.300334	4.30405	5.07037	0.766315	12.6166	14.4019	0	UP	UP
comp22679_c0_seq1	1464	4.63283	0.163325	1e-05	4.82608	18.8215	13.9955	7.12801	8.83869	0		UP
comp22731_c0_seq2	2496	7.5202	4.82172	0.0909652	0.641222	6.36931	5.72809	0	11.7416	5.28194		UP
comp22810_c0_seq1	1955	23.0837	43.1236	536.516	-0.901605	-4.53868	-3.63707	0	34.375	24.0689		DOWN	DOWN
comp22826_c0_seq4	2560	67.2284	35.7287	6.54945	0.911987	3.35962	2.44764	0.226941	17.1624	6.59541		UP
comp22834_c0_seq7	1718	10.0203	18.8716	51.4455	-0.913292	-2.36012	-1.44683	0	7.85723	2.82982		DOWN
comp22856_c0_seq1	1683	16.9404	0.30058	0.684755	5.81657	4.62873	-1.18784	14.9403	14.53	0	UP	UP
comp22867_c0_seq1	978	51930.8	2990.23	36.5011	4.11826	10.4744	6.35618	16.2561	70.0086	33.1129	UP	UP	UP
comp22873_c0_seq4	2344	52.2946	38.0053	3.4854	0.46046	3.90727	3.44681	0	20.5951	12.7349		UP	UP
comp22874_c0_seq1	1169	20.3889	6.14699	0.926884	1.72984	4.45925	2.72942	2.03808	13.0517	1.79535		UP
comp22881_c0_seq1	1955	23.0655	1e-05	0.0920788	21.1373	7.96865	-13.1687	20.0361	21.9199	0	UP	UP
comp22886_c0_seq1	1463	19.9306	1.62027	0.280917	3.62068	6.1487	2.52802	6.41609	13.5336	0.0133923		UP
comp22892_c0_seq1	1246	670.221	81.7954	96.1196	3.03454	2.80173	-0.23281	9.83235	10.2273	0	UP	UP
comp22934_c0_seq2	1661	53.373	5.66467	0.0525584	3.23605	9.98797	6.75193	4.05279	18.3221	3.65803		UP
comp22937_c0_seq2	1113	16.2995	2.27476	0.493219	2.84104	5.04645	2.20541	5.37559	14.128	0.268741		UP
comp22973_c0_seq1	4643	16.8887	34.9262	78.1892	-1.04825	-2.21091	-1.16266	0	9.40662	2.2467		DOWN
comp22975_c0_seq2	948	35.8554	0.0328796	1e-05	10.0908	21.7738	11.683	15.2338	17.0725	0	UP	UP
comp22977_c0_seq1	1140	56.6534	19.4551	1.2638	1.54202	5.48633	3.94431	0.88959	16.8074	5.87886		UP
comp22981_c0_seq1	610	22.0201	0.301111	5.77717	6.19238	1.93039	-4.262	22.4916	6.92966	4.66074	UP
comp22992_c0_seq1	2156	6.98823	9.35466	166.399	-0.420757	-4.57357	-4.15282	0	32.2277	29.5039		DOWN	DOWN
comp23048_c0_seq1	830	55.2841	8.06271	2.95121	2.77753	4.22748	1.44996	4.28111	11.2642	0.200229		UP
comp23062_c0_seq1	1397	12.6892	20.8784	0.290577	-0.718407	5.44854	6.16694	0	7.64165	9.09104			UP
comp23072_c0_seq5	2417	14.4901	9.16537	55.6597	0.6608	-1.94157	-2.60237	0	6.84133	13.3565			DOWN
comp23073_c0_seq2	1582	181.837	117.581	8.8139	0.628987	4.36672	3.73774	0	16.1872	9.82083		UP	UP
comp23078_c0_seq2	1713	74.0038	92.1883	10.4591	-0.316984	2.82284	3.13982	0	10.9153	11.0136		UP	UP
comp2308_c0_seq1	500	3.49911	5.41127	51.8159	-0.628978	-3.88833	-3.25936	0	18.5243	15.008		DOWN	DOWN
comp23102_c0_seq1	818	6.35151	1.4583	0.0355744	2.12281	7.48012	5.35731	2.91249	12.0946	0.450422		UP
comp23106_c0_seq1	1084	10.1489	58.8636	998.325	-2.53605	-6.62011	-4.08406	5.53585	48.2148	23.0917		DOWN	DOWN
comp23115_c1_seq1	2805	13.9225	0.00997802	0.257902	10.4464	5.75445	-4.69193	9.04225	8.59317	0	UP	UP
comp23131_c0_seq1	2966	14.8602	31.1102	90.6061	-1.06594	-2.60816	-1.54222	0	13.2225	4.68402		DOWN
comp23138_c0_seq5	857	7.18085	11.5699	231.783	-0.688147	-5.01248	-4.32433	0	37.8109	32.0215		DOWN	DOWN
comp23140_c0_seq2	4646	89.0502	75.0865	14.3639	0.246065	2.63217	2.3861	0	12.4575	7.61412		UP
comp23141_c0_seq2	767	10.0632	6.32147	0.734133	0.670757	3.7769	3.10615	0	11.8078	4.24562		UP
comp23188_c0_seq2	367	3.79822	19.8511	3.27808	-2.38582	0.212472	2.5983	4.6334	0	8.28492			UP
comp23193_c1_seq1	1118	111.575	18.4607	5.79309	2.59549	4.26754	1.67205	2.71104	10.0846	0.553672		UP
comp23215_c0_seq4	2706	14.3217	33.598	78.0807	-1.23018	-2.44677	-1.21659	0.0671583	8.99107	1.90852		DOWN
comp23225_c0_seq2	2923	14.1085	0.00533183	1e-05	11.3696	20.4281	9.05849	14.1611	15.9142	0	UP	UP
comp23229_c0_seq3	1419	10.7445	4.19885	0.359079	1.35553	4.90315	3.54762	2.21231	16.6971	3.00624		UP
comp23249_c0_seq1	3209	13.4857	3.51227	0.985718	1.94095	3.77411	1.83316	2.93042	11.229	0.361303		UP
comp23257_c0_seq2	2569	29.6814	52.8602	146.148	-0.832625	-2.2998	-1.46717	0	9.89197	3.78294		DOWN
comp23275_c0_seq1	1535	16.0952	0.0406138	0.196815	8.63044	6.35365	-2.27679	14.197	13.2131	0	UP	UP
comp23283_c0_seq2	2127	14.156	1.47367	0.0847653	3.26393	7.38373	4.1198	9.69296	20.6749	0.390164	UP	UP
comp23329_c0_seq1	3396	5.86597	5.80748	0.426786	0.0144577	3.78078	3.76633	0	7.65483	5.61326		UP
comp23334_c0_seq3	1611	28.7227	12.8153	70.4447	1.16433	-1.2943	-2.45863	1.2744	1.95415	10.6848			DOWN
comp23340_c0_seq2	2333	17.2094	9.66417	0.363586	0.832477	5.56476	4.73228	0	11.687	5.71577		UP
comp23363_c0_seq1	1106	13.537	5.94485	89.7997	1.18719	-2.72981	-3.917	0.204599	9.04897	18.6426		DOWN	DOWN
comp2337_c0_seq1	275	3.09637	1.77623	38.12	0.801758	-3.62189	-4.42365	0	14.0935	19.5504		DOWN	DOWN
comp23381_c0_seq3	1295	16.0177	2.07429	0.235119	2.94898	6.09013	3.14115	9.57451	20.4317	0.353681	UP	UP
comp23400_c0_seq4	888	64.394	1e-05	0.0327701	22.6185	10.9403	-11.6782	22.2468	24.4282	0	UP	UP
comp23403_c0_seq3	1417	84.0355	7.94799	2.63121	3.40234	4.9972	1.59487	17.5482	31.442	0.887779	UP	UP
comp23430_c0_seq3	1476	32.0989	4.68056	0.986081	2.77777	5.02468	2.2469	7.67204	20.7144	1.18521	UP	UP
comp23433_c0_seq2	1307	24.5185	0.0894325	2.99436	8.09885	3.03355	-5.0653	20.1573	8.81595	2.28073	UP	UP
comp23454_c0_seq1	3385	13.3718	7.15062	1.87815	0.903055	2.83181	1.92875	0.440956	10.1165	1.58702		UP
comp23478_c0_seq1	1934	9.71611	15.293	324.123	-0.654421	-5.06002	-4.4056	0	38.6331	32.23		DOWN	DOWN
comp23484_c0_seq1	1457	12.2939	0.327007	0.277759	5.23247	5.46796	0.23549	10.4682	12.2604	0	UP	UP
comp23492_c0_seq3	1592	54.6955	11.8014	4.20691	2.21247	3.70059	1.48812	8.56455	21.5678	1.13259	UP	UP
comp23517_c0_seq3	2098	5.84853	31.5513	314.4	-2.43155	-5.74838	-3.31683	4.60785	44.0758	19.3659		DOWN	DOWN
comp23519_c0_seq1	1421	144.882	109.143	23.0334	0.408651	2.65308	2.24442	0	12.0511	6.45419		UP
comp23528_c0_seq1	2239	41.9247	46.6213	9.05101	-0.153188	2.21165	2.36484	0	9.26282	7.76329		UP	UP
comp23529_c0_seq1	2462	18.1109	14.9063	594.373	0.280938	-5.03644	-5.31737	0	40.4866	44.9965		DOWN	DOWN
comp23553_c0_seq4	1420	13.5723	0.96226	0.539353	3.81809	4.65329	0.835198	15.409	19.5708	0	UP	UP
comp23560_c0_seq1	1051	146.708	69.7045	32.4001	1.07363	2.17888	1.10526	1.06046	9.50464	1.02048		UP
comp23579_c0_seq1	1752	16.7261	20.6868	77.4076	-0.306607	-2.21037	-1.90377	0	9.02632	7.18585		DOWN
comp23585_c0_seq1	512	17.4059	1e-05	0.0301805	20.7311	9.17174	-11.5594	20.6966	22.6286	0	UP	UP
comp23601_c0_seq2	681	9.95695	30.4635	308.091	-1.61331	-4.95151	-3.3382	0	12.1528	5.33587		DOWN
comp23607_c0_seq1	2232	11.4528	0.261059	1.07005	5.45518	3.41996	-2.03522	10.06	8.37013	0	UP	UP
comp23608_c0_seq2	1972	15.7444	7.49813	1.79256	1.07024	3.13475	2.06451	0.911038	14.1776	2.84638		UP
comp2361_c0_seq1	272	18.2589	5.09986	2.79976	1.84007	2.70522	0.865154	2.68586	8.43358	0		UP
comp23621_c0_seq1	1504	14.9641	6.50527	239.736	1.20182	-4.00187	-5.20369	0	6.40134	9.47102			DOWN
comp23636_c0_seq4	3111	26.3303	14.5532	1.29989	0.855384	4.34026	3.48488	0	16.824	7.19393		UP
comp23638_c0_seq2	2183	14.1104	21.2526	0.925089	-0.590872	3.93103	4.5219	0	7.34699	8.87338			UP
comp23641_c0_seq1	2128	19.6419	0.325759	0.128559	5.91398	7.25536	1.34137	21.7083	27.3317	0	UP	UP
comp23643_c0_seq3	1818	18.555	19.7494	4.09172	-0.0899954	2.18103	2.27103	0	9.00197	7.00547		UP
comp23651_c0_seq1	2146	26.3375	36.8147	127.186	-0.483166	-2.27175	-1.78859	0	9.93605	6.26073		DOWN
comp23670_c0_seq1	828	15.0496	1e-05	1e-05	20.5213	20.5213	0	12.4966	14.2798	0	UP	UP
comp23680_c0_seq1	845	2667.35	1.37313	1.30243	10.9237	11	0.076264	41.0761	44.6307	0	UP	UP
comp23700_c0_seq1	1160	16997.7	669.91	10.0785	4.66523	10.7199	6.05462	30.9112	101.303	42.3928	UP	UP	UP
comp23729_c0_seq1	1868	17.3051	1.27446	153.251	3.76324	-3.14663	-6.90986	6.34808	7.24052	25.8566			DOWN
comp23736_c0_seq1	1133	15.6274	23.0714	1.87961	-0.562028	3.05557	3.6176	0	10.835	13.9832		UP	UP
comp23753_c0_seq1	2537	10.7244	0.179001	0.0260083	5.90478	8.6877	2.78292	13.0692	14.8574	0	UP	UP
comp23835_c0_seq1	2405	33.4257	0.082193	0.117622	8.66773	8.15066	-0.517068	21.4005	23.4005	0	UP	UP
comp23839_c0_seq2	2049	9.05249	8.39322	33.6733	0.10909	-1.89522	-2.00431	0	6.39212	8.41092			DOWN
comp23873_c0_seq2	1289	14.7274	3.4817	64.9655	2.08064	-2.14117	-4.22181	1.27932	3.06549	11.4393			DOWN
comp23881_c0_seq5	2299	18.6911	47.9817	137.112	-1.36013	-2.87493	-1.5148	0.459481	11.5986	2.69021		DOWN
comp23910_c1_seq1	1899	53.1904	220.809	508.558	-2.05356	-3.25717	-1.20362	2.16173	10.4215	0.781604		DOWN
comp23935_c0_seq2	1324	16.1087	1e-05	0.023342	20.6194	9.4307	-11.1887	9.97318	11.7466	0	UP	UP
comp23999_c0_seq1	2045	11.6407	11.7046	65.9924	-0.00789918	-2.50312	-2.49522	0	7.61249	7.91851			DOWN
comp2403_c0_seq1	907	4.11818	3.40052	17.8523	0.276251	-2.11603	-2.39228	0	6.75745	8.0228			DOWN
comp24030_c0_seq1	1148	17.2441	23.0116	83.7532	-0.416257	-2.28004	-1.86378	0	9.40662	6.6227		DOWN
comp24031_c0_seq1	1824	323.662	126.208	10.7804	1.35869	4.908	3.54931	0	10.151	4.08853		UP
comp24038_c0_seq1	2174	100.687	23.5379	9.8889	2.09682	3.34792	1.2511	2.07036	8.22019	0.272029		UP
comp24048_c0_seq1	1381	11493.7	1382.16	35.0612	3.05585	8.35676	5.30091	14.4265	74.1012	35.6322	UP	UP	UP
comp24065_c0_seq9	3653	37.689	42.9289	3.61837	-0.187805	3.38073	3.56854	0	17.0399	16.2874		UP	UP
comp2407_c0_seq1	225	7.95147	52.6815	488.546	-2.728	-5.94113	-3.21312	5.48451	34.7747	11.9281		DOWN	DOWN
comp24089_c0_seq1	2117	14.5238	25.3132	79.4495	-0.801467	-2.45162	-1.65015	0	7.86987	3.38458		DOWN
comp24093_c0_seq20	2117	16.4498	5.88375	0.31605	1.48326	5.70177	4.21851	0	8.60782	2.45268		UP
comp24094_c0_seq1	1834	14.7553	23.8236	229.047	-0.691153	-3.95633	-3.26518	0	28.4898	20.9623		DOWN	DOWN
comp24112_c0_seq1	3507	25.0031	13.4722	0.22899	0.892116	6.77068	5.87856	0.375674	28.1043	14.0018		UP	UP
comp24142_c0_seq2	2457	9.16687	7.64687	95.7479	0.261561	-3.38474	-3.6463	0	13.8992	17.2081		DOWN	DOWN
comp24151_c0_seq2	1334	18.3985	6.44519	2.72341	1.51329	2.7561	1.24281	1.29762	8.19484	0.364108		UP
comp24164_c0_seq1	1666	18.9895	32.7799	104.989	-0.787609	-2.46696	-1.67935	0	7.99766	3.70892		DOWN
comp24165_c0_seq1	4290	11.8413	1.16003	0.00720393	3.35159	10.6828	7.33116	5.48821	14.6659	0.352482		UP
comp24168_c1_seq1	1611	15.3643	1.2676	2.91463	3.59941	2.39819	-1.20121	8.60125	5.54035	0.0997735	UP
comp24195_c0_seq1	1618	29.425	0.186548	0.218332	7.30136	7.07437	-0.226983	27.3076	26.2357	0	UP	UP
comp24195_c1_seq1	1114	19.9988	0.726927	1e-05	4.78196	20.9315	16.1495	11.8185	18.5243	0	UP	UP
comp24227_c0_seq1	1219	18.1742	0.561757	18.6081	5.0158	-0.0340399	-5.04984	17.5951	0	17.9955	UP		DOWN
comp24255_c0_seq3	2986	39.0825	0.335152	0.328874	6.86557	6.89285	0.0272799	25.1546	27.4109	0	UP	UP
comp24267_c0_seq7	1834	57.7639	28.0477	4.47444	1.04229	3.69039	2.6481	0.501117	15.3788	5.09109		UP
comp24269_c0_seq2	1336	64.5292	219.905	1566.93	-1.76885	-4.60185	-2.83299	3.05527	36.7968	15.6578		DOWN	DOWN
comp24273_c0_seq2	1399	33.0949	5.30211	0.0753821	2.64197	8.77817	6.1362	11.3428	37.9615	6.48829	UP	UP
comp24275_c0_seq1	3068	372.223	124.232	3.56629	1.58314	6.7056	5.12246	1.88034	38.4425	21.6628		UP	UP
comp24298_c1_seq2	1545	12.4025	3.46262	0.0640613	1.84069	7.59696	5.75627	3.40218	19.1311	3.37735		UP
comp24309_c0_seq1	1941	24.6874	28.3672	156.865	-0.200448	-2.66767	-2.46722	0	14.4438	12.9741		DOWN	DOWN
comp24320_c0_seq2	1261	58.3883	11.2505	2.28131	2.37569	4.67775	2.30206	7.5371	23.1587	2.41237		UP
comp24350_c0_seq5	1965	36.0731	19.7711	6.45222	0.867532	2.48306	1.61552	0.268764	10.0926	1.99911		UP
comp24386_c0_seq4	2552	8.58656	0.113542	0.672427	6.24079	3.67463	-2.56616	9.58177	7.01983	0	UP
comp24393_c0_seq3	1426	18.7114	7.352	1.49143	1.34771	3.64915	2.30144	0.50635	9.86726	1.81151		UP
comp24411_c0_seq2	4171	23.0718	16.7689	4.07701	0.460348	2.50055	2.0402	0	12.4179	5.3095		UP
comp24415_c0_seq3	3118	7.11542	3.76394	26.855	0.918704	-1.91617	-2.83487	0	4.06186	9.2539			DOWN
comp24433_c0_seq1	1185	6.79227	11.8127	242.495	-0.798375	-5.15792	-4.35954	0	32.9346	25.8722		DOWN	DOWN
comp2445_c0_seq1	2117	23.4507	6.39231	2.15687	1.87522	3.44262	1.5674	4.66617	15.8208	0.858884		UP
comp24470_c1_seq3	2892	13.2551	16.2704	139.487	-0.295707	-3.39551	-3.09981	0	15.3206	12.9421		DOWN	DOWN
comp24509_c0_seq6	2268	64.9964	74.1828	14.1366	-0.190724	2.20093	2.39165	0	8.73667	7.71829		UP	UP
comp24532_c0_seq1	1104	15.2525	15.681	137.856	-0.0399706	-3.17604	-3.13607	0	18.7906	19.5083		DOWN	DOWN
comp24551_c0_seq49	2306	15.9878	128.446	277.031	-3.00612	-4.115	-1.10888	2.49144	7.74603	0.0707325		DOWN
comp24553_c0_seq2	1515	19.4339	21.9207	676.147	-0.173717	-5.12069	-4.94697	0	37.3932	36.4284		DOWN	DOWN
comp24558_c0_seq4	893	38.4979	15.5999	4.41742	1.30324	3.12351	1.82026	1.94561	15.8758	2.85604		UP
comp24562_c0_seq6	1496	1091.06	197.226	44.634	2.46781	4.61145	2.14363	1.719	9.80202	1.20854		UP
comp24565_c0_seq1	1440	37.0927	55.947	168.162	-0.592927	-2.18065	-1.58772	0	9.26066	5.04627		DOWN
comp24571_c0_seq140	4091	23.1478	23.846	4.64163	-0.0428715	2.31817	2.36104	0	7.79717	5.64527		UP
comp24598_c0_seq20	1284	17.4653	0.0728307	0.245787	7.90573	6.15094	-1.75479	16.2268	15.1972	0	UP	UP
comp24619_c1_seq1	4476	31.7754	26.5366	5.37738	0.259926	2.56293	2.30301	0	10.2538	6.01028		UP
comp24625_c0_seq4	2423	15.9843	31.0725	81.6649	-0.958983	-2.35306	-1.39408	0	9.7267	3.28784		DOWN
comp24640_c0_seq4	943	7.56269	4.74929	65.7513	0.671187	-3.12005	-3.79124	0	13.7772	20.76		DOWN	DOWN
comp24692_c0_seq2	3555	39.9407	26.5871	5.20378	0.587132	2.94023	2.3531	0	16.5242	7.24452		UP
comp24712_c1_seq2	465	19.4039	3.77371	0.942227	2.36229	4.36413	2.00184	3.44917	11.5324	0.395964		UP
comp24720_c0_seq3	5082	216.221	29.1699	5.34661	2.88996	5.33774	2.44778	3.38828	13.7036	1.74815		UP
comp24720_c2_seq1	1633	1704.65	230.322	75.5411	2.88775	4.49607	1.60832	13.6847	32.1399	2.83878	UP	UP
comp24721_c0_seq2	1619	44.7933	49.8858	209.022	-0.155347	-2.2223	-2.06696	0	9.2525	8.39426		DOWN	DOWN
comp24789_c0_seq9	1066	79.9394	118.264	415.513	-0.565028	-2.37792	-1.81289	0	10.8103	6.40386		DOWN
comp24792_c0_seq8	1753	74.6693	19.9872	6.2432	1.90143	3.58016	1.67872	3.10431	14.4104	1.51334		UP
comp24792_c1_seq1	1767	53.959	23.9184	1.43143	1.17374	5.23634	4.0626	1.56029	31.5894	14.513		UP	UP
comp24826_c0_seq9	826	7619.08	938.291	17.0066	3.02151	8.80738	5.78587	1.39839	16.5323	7.03018		UP
comp24834_c0_seq1	1640	24.392	28.6565	182.891	-0.232452	-2.9065	-2.67405	0	16.7522	14.7407		DOWN	DOWN
comp24845_c0_seq8	940	23.5352	0.63934	1.63193	5.20209	3.85016	-1.35193	21.8944	18.3316	0	UP	UP
comp24853_c0_seq11	1489	22.7992	56.3884	223.131	-1.30641	-3.29083	-1.98442	0	9.67487	2.99319		DOWN
comp24864_c0_seq1	2560	30.5973	19.5475	5.20308	0.646417	2.55596	1.90955	0	11.1652	3.79709		UP
comp24868_c0_seq1	3755	39.4438	10.3266	1.76968	1.93344	4.47823	2.5448	0.510754	8.76978	1.57344		UP
comp24892_c0_seq1	558	3105.46	174.611	2.93709	4.15259	10.0462	5.89361	7.63695	32.9787	12.3968		UP	UP
comp24895_c0_seq1	487	727.529	7.75788	0.762095	6.5512	9.89882	3.34762	30.2269	47.6454	3.05521	UP	UP
comp24896_c0_seq1	1524	712.372	256.379	35.5863	1.47435	4.32324	2.84888	1.2744	18.6275	6.26089		UP
comp24914_c0_seq1	1895	489.537	271.557	11.6019	0.850162	5.39898	4.54882	0	32.0831	21.121		UP	UP
comp24916_c0_seq1	1205	557.871	0.453596	0.990313	10.2643	9.13783	-1.12648	47.9354	48.2148	0	UP	UP
comp24928_c0_seq1	1401	352.321	21.7733	12.7746	4.01626	4.78554	0.769278	11.7828	18.8104	0.0125095	UP	UP
comp24935_c0_seq1	941	364.178	243.576	74.0098	0.580274	2.29886	1.71858	0	13.5092	5.07165		UP
comp24942_c0_seq1	378	29.3985	14.8878	1.08009	0.98161	4.76652	3.78491	0.552009	25.4574	11.4305		UP	UP
comp24944_c0_seq1	897	596.886	421.682	45.6203	0.501301	3.70971	3.20841	0	15.2716	9.43867		UP	UP
comp24953_c0_seq1	1832	334.094	27.0391	2.29316	3.62714	7.18677	3.55964	17.2525	45.1617	8.46075	UP	UP	UP
comp24954_c0_seq1	2602	393.081	366.164	109.606	0.102335	1.84249	1.74016	0	9.44078	5.81883		UP
comp24955_c0_seq1	522	145.506	96.06	14.358	0.599069	3.34115	2.74208	0	10.1791	5.57291		UP
comp24962_c0_seq1	323	250.999	65.9727	6.22604	1.92774	5.33322	3.40548	1.88556	21.3033	7.43934		UP
comp24983_c0_seq1	1476	227.97	15.7707	273.648	3.85353	-0.263474	-4.11701	15.0769	0	16.113	UP		DOWN
comp24988_c0_seq1	927	156.587	0.161264	0.328152	9.92333	8.89838	-1.02494	34.5683	34.2977	0	UP	UP
comp24991_c0_seq1	1239	540.563	4.28289	0.591584	6.97973	9.83566	2.85593	45.372	63.2153	1.19093	UP	UP
comp24996_c0_seq1	981	230.051	1.5365	14.3429	7.22617	4.00355	-3.22262	38.8771	19.9408	5.89838	UP	UP
comp24999_c0_seq1	4232	95.1482	67.2116	6.93609	0.501466	3.77798	3.27652	0	15.0508	9.29633		UP	UP
comp25013_c0_seq1	337	339.416	890.535	119.928	-1.39162	1.50089	2.89251	0.224071	3.15366	9.36018			UP
comp25024_c0_seq1	2065	168.586	0.157488	0.230266	10.064	9.51597	-0.548058	39.7278	39.4667	0	UP	UP
comp25031_c0_seq1	552	659.082	32.3289	2.03815	4.34956	8.33705	3.98749	8.86601	25.8707	5.09902	UP	UP
comp25034_c0_seq1	1710	116.969	0.160337	0.108768	9.5108	10.0707	0.559856	34.598	37.2985	0	UP	UP
comp25036_c0_seq1	420	216.201	86.4171	6.67617	1.32298	5.01721	3.69422	0	9.54053	4.28626		UP
comp25037_c0_seq1	304	164.261	76.8772	0.635002	1.09536	8.01501	6.91965	1.00494	49.8	33.2242		UP	UP
comp25043_c0_seq1	1166	102.276	64.3962	21.9379	0.667422	2.22097	1.55355	0.0581448	12.6749	3.87602		UP
comp25045_c0_seq1	1176	126.448	57.4817	4.83671	1.13737	4.70838	3.57101	0.206183	19.9489	9.37977		UP	UP
comp25047_c0_seq1	549	280.843	124.007	2.34734	1.17934	6.90259	5.72325	0.963055	46.163	30.0547		UP	UP
comp25049_c0_seq1	695	225.317	95.1831	40.1608	1.24318	2.4881	1.24492	1.66539	11.1473	1.22914		UP
comp25051_c0_seq1	1559	113.984	1.4975	15.4667	6.25013	2.8816	-3.36853	21.968	7.39598	5.16334	UP
comp25052_c0_seq1	535	88.9918	10.5567	1.0208	3.07552	6.44589	3.37037	4.14618	16.2583	2.51319		UP
comp25055_c0_seq1	206	34.9274	2.04195	0.291285	4.09634	6.90578	2.80944	22.0533	34.7476	0.343012	UP	UP
comp25071_c0_seq1	864	171.321	69.6136	36.0517	1.29927	2.24857	0.949302	2.44802	11.611	0.827199		UP
comp25072_c0_seq1	746	136.432	64.8613	3.27105	1.07275	5.38228	4.30953	1.71615	47.1006	26.8293		UP	UP
comp25073_c0_seq1	782	150.619	94.954	19.3598	0.665603	2.95977	2.29417	0	19.0921	8.54164		UP	UP
comp25074_c0_seq1	2107	207.13	108.82	2.18207	0.928588	6.5687	5.64011	0	33.3946	22.4996		UP	UP
comp25075_c0_seq1	217	85.2814	71.6394	796.358	0.251479	-3.22311	-3.47459	0	16.6971	19.6156		DOWN	DOWN
comp25078_c0_seq1	395	123.336	59.8667	3.54207	1.04277	5.12186	4.07909	0	9.55599	5.12433		UP
comp25080_c0_seq1	1188	110.385	32.8762	20.2204	1.74743	2.44866	0.701235	4.51585	11.2517	0.0468854		UP
comp25087_c0_seq1	656	135.233	0.18521	0.182941	9.51207	9.52986	0.0177852	31.1338	30.8278	0	UP	UP
comp25093_c0_seq1	375	144.149	62.9867	5.06748	1.19444	4.83015	3.63571	0	9.68353	4.52623		UP
comp25094_c0_seq1	1520	98.1114	34.9425	2.60468	1.48944	5.23524	3.74581	3.40218	37.3386	15.3434		UP	UP
comp25104_c0_seq1	438	214.695	123.238	11.4302	0.800847	4.23137	3.43052	0	21.6818	12.1922		UP	UP
comp25105_c0_seq1	459	84.2714	5.7997	104.962	3.86099	-0.316752	-4.17775	13.6379	0	15.047	UP		DOWN
comp25119_c0_seq1	1590	72.7454	0.552106	0.198485	7.04177	8.51769	1.47592	29.4532	31.7278	0	UP	UP
comp25121_c0_seq1	1119	126.488	85.935	17.3123	0.557683	2.86913	2.31145	0	18.3221	8.80047		UP	UP
comp25122_c0_seq1	954	93.3975	38.1737	9.2342	1.29081	3.33833	2.04752	2.27933	20.599	5.00825		UP
comp25126_c0_seq1	516	133.906	1e-05	0.0563951	23.6747	11.2134	-12.4614	34.3988	36.9379	0	UP	UP
comp25141_c0_seq1	1903	174.711	126.475	12.3165	0.466123	3.82631	3.36019	0	21.3334	13.8405		UP	UP
comp25142_c0_seq1	1620	257.761	71.5165	5.80328	1.84969	5.47302	3.62334	4.53884	38.544	15.5577		UP	UP
comp25149_c0_seq1	711	70.174	0.411547	0.209718	7.41374	8.38634	0.972607	34.598	37.3267	0	UP	UP
comp25152_c0_seq1	374	98.5235	0.891241	0.243827	6.78851	8.65847	1.86996	39.7278	45.323	0	UP	UP
comp25159_c0_seq1	723	112.041	29.2148	1.86385	1.93925	5.9096	3.97034	5.95944	39.8591	14.4044		UP	UP
comp25160_c0_seq1	465	101.016	17.0499	0.524539	2.56674	7.58932	5.02257	5.20693	29.0692	8.68051		UP	UP
comp25164_c0_seq1	915	128.956	51.9318	13.2245	1.31219	3.28559	1.9734	2.10183	19.6868	4.72998		UP
comp25167_c0_seq1	781	122.545	20.96	0.794952	2.54761	7.26823	4.72063	5.49617	31.967	10.5898		UP	UP
comp25175_c0_seq1	1313	67.3482	0.944568	0.0989182	6.15584	9.41119	3.25535	31.0535	41.3983	0.0354868	UP	UP
comp25176_c0_seq1	295	65.7934	0.211321	1e-05	8.28236	22.6495	14.3672	25.8017	28.0479	0	UP	UP
comp25178_c0_seq1	1866	68.8647	7.10621	10.4995	3.27661	2.71345	-0.563169	13.1277	10.5574	0	UP	UP
comp25186_c0_seq1	715	94.2633	13.2022	3.50804	2.83592	4.74796	1.91204	2.54455	10.2095	0.733937		UP
comp25194_c0_seq1	305	93.6869	55.2649	2.69746	0.761484	5.11818	4.35669	0	23.605	14.8028		UP	UP
comp25198_c0_seq1	531	279.902	1537.96	14760.3	-2.45803	-5.72066	-3.26263	6.39966	40.9199	15.6124		DOWN	DOWN
comp25202_c0_seq1	3287	66.2135	0.0910078	0.0930946	9.50692	9.47421	-0.0327068	32.7119	35.0904	0	UP	UP
comp25203_c0_seq1	1767	90.0413	57.197	8.77747	0.654647	3.35871	2.70406	0	21.2305	10.567		UP	UP
comp25207_c0_seq1	1175	88.9744	102.081	393.288	-0.198249	-2.14412	-1.94587	0	9.52152	8.50386		DOWN	DOWN
comp25226_c0_seq1	1258	43.4144	0.451377	3.0837	6.5877	3.81544	-2.77226	13.0036	7.11426	0.895298	UP
comp25261_c0_seq1	1050	53.7163	63.156	13.0421	-0.233559	2.04218	2.27574	0	7.83776	7.6578		UP	UP
comp25262_c0_seq1	400	62.7044	70.7848	538.708	-0.174873	-3.10287	-2.92799	0	16.1732	14.7694		DOWN	DOWN
comp25268_c0_seq1	545	301.96	9.68829	2.32953	4.96197	7.01818	2.0562	4.64366	10.3533	0.199624		UP
comp25271_c0_seq1	1959	78.5923	51.2337	1.41175	0.617296	5.79883	5.18153	0	24.3079	16.5776		UP	UP
comp25273_c0_seq1	569	41.5049	1e-05	1e-05	21.9849	21.9849	0	19.5841	21.4438	0	UP	UP
comp25294_c0_seq1	1186	58.5324	7.82508	5.82215	2.90306	3.32961	0.426553	11.8633	16.4122	0	UP	UP
comp25299_c0_seq1	219	49.6715	9.35088	6.31025	2.40924	2.97665	0.567405	6.4092	11.1962	0		UP
comp25300_c0_seq1	375	100.117	3.22008	0.0775996	4.95844	10.3333	5.3749	19.2835	34.7747	2.08896	UP	UP
comp25303_c0_seq1	1448	85.9776	100.21	724.591	-0.220993	-3.07513	-2.85414	0	13.2965	11.7293		DOWN	DOWN
comp25320_c0_seq1	315	35.6066	1e-05	1e-05	21.7637	21.7637	0	26.8857	29.0874	0	UP	UP
comp25323_c0_seq1	421	48.911	57.0824	9.9555	-0.222886	2.29659	2.51948	0	8.99352	8.88103		UP	UP
comp25340_c0_seq1	239	33.9787	1e-05	0.129309	21.6962	8.03766	-13.6585	21.8007	23.8799	0	UP	UP
comp25351_c0_seq1	285	45.6011	43.3351	535.747	0.0735325	-3.55441	-3.62794	0	21.4173	22.2506		DOWN	DOWN
comp25355_c0_seq1	1608	85.446	136.632	3281.62	-0.677213	-5.26325	-4.58604	0	26.3049	21.088		DOWN	DOWN
comp25363_c0_seq1	641	36.2678	26.6624	8.14997	0.443885	2.15382	1.70994	0	8.19954	2.96796		UP
comp25377_c0_seq1	537	6.33055	5.12517	0.122874	0.304733	5.68708	5.38235	0	9.73272	5.49987		UP
comp25383_c0_seq1	218	26.6825	3.58369	3.18297	2.89638	3.06745	0.17107	7.51954	9.96964	0		UP
comp25392_c0_seq1	398	17.1144	0.234961	0.192566	6.18664	6.47371	0.287069	12.1403	16.7266	0	UP	UP
comp25427_c0_seq1	1317	18.1249	0.404282	0.0940783	5.48647	7.58989	2.10343	9.88769	14.1436	0	UP	UP
comp25431_c0_seq1	201	18.573	1e-05	1e-05	20.8248	20.8248	0	15.5523	17.415	0	UP	UP
comp25440_c0_seq1	384	30.6272	4.41932	0.378904	2.79292	6.33684	3.54392	4.91935	17.0932	1.93649		UP
comp25444_c0_seq1	1030	55.8871	25.544	2.46728	1.12953	4.50153	3.37199	1.81567	30.6861	12.7128		UP	UP
comp25451_c0_seq1	408	30.3772	18.7039	5.36194	0.699646	2.50216	1.80252	0	9.6522	3.00837		UP
comp25462_c0_seq1	837	26.8931	0.11172	1e-05	7.9112	21.3588	13.4476	32.7418	35.2184	0	UP	UP
comp25465_c0_seq1	449	31.1716	8.53693	4.07041	1.86844	2.93699	1.06854	8.57349	18.8723	0.385219	UP	UP
comp25468_c0_seq1	320	8.03692	4.68218	0.103099	0.779462	6.28455	5.50508	0	12.2972	4.94127		UP
comp25469_c0_seq1	1515	19.4945	1.30575	1.39937	3.90012	3.80022	-0.0999072	10.4561	12.2474	0	UP	UP
comp25485_c0_seq1	362	35.9506	163.646	1536.79	-2.18649	-5.41776	-3.23126	2.04058	25.2579	9.93842		DOWN	DOWN
comp25487_c0_seq1	2488	21.0394	0.968682	0.33307	4.44092	5.98112	1.5402	12.2304	17.9669	0	UP	UP
comp25490_c0_seq1	302	33.3089	47.6596	797.141	-0.51686	-4.58086	-4.064	0	26.8864	22.2331		DOWN	DOWN
comp25498_c0_seq1	886	23.3039	0.0983596	0.0721179	7.88829	8.336	0.447709	18.5413	20.4171	0	UP	UP
comp25523_c0_seq1	617	11.8265	1e-05	0.100178	20.1736	6.88331	-13.2903	8.95397	10.7162	0	UP	UP
comp25527_c0_seq1	975	22.5618	1e-05	1e-05	21.1054	21.1054	0	21.0691	23.0043	0	UP	UP
comp25529_c0_seq1	395	31.1473	0.999068	0.0417615	4.96238	9.54272	4.58034	21.1656	31.3446	0.0406697	UP	UP
comp25532_c0_seq1	589	39.3551	32.6098	3.74925	0.271245	3.39188	3.12063	0	13.0835	8.62597		UP	UP
comp25544_c0_seq1	1855	17.0135	2.28391	2.70639	2.8971	2.65224	-0.244863	8.8751	8.64087	0	UP	UP
comp25548_c0_seq1	442	16.0197	1e-05	1e-05	20.6114	20.6114	0	9.54721	11.2806	0	UP	UP
comp25551_c0_seq1	486	12.7579	2.42563	0.763083	2.39496	4.06341	1.66844	2.44802	8.0261	0.0630056		UP
comp2557_c0_seq2	1220	12.7062	18.1978	172.377	-0.518233	-3.76196	-3.24373	0	13.3116	10.3275		DOWN	DOWN
comp25583_c0_seq1	315	7.63634	0.964833	22.2434	2.98453	-1.54243	-4.52696	2.98027	1.34671	12.3682			DOWN
comp25585_c0_seq1	665	22.5701	7.22701	3.54316	1.64295	2.67131	1.02836	5.82044	15.5324	0.307156		UP
comp25601_c0_seq1	1024	21.9161	22.8983	102.247	-0.0632439	-2.22199	-2.15875	0	9.99256	10.1954		DOWN	DOWN
comp25607_c0_seq1	217	13.9208	1e-05	0.142419	20.4088	6.61096	-13.7979	19.4831	21.3444	0	UP	UP
comp25612_c0_seq1	332	18.2417	3.68581	1.40207	2.30719	3.70161	1.39442	6.44789	16.1702	0.282619		UP
comp25631_c0_seq1	414	20.2122	15.6189	3.74621	0.371934	2.43172	2.05979	0	8.76978	4.09781		UP
comp25632_c0_seq1	205	19.8284	4.49943	0.463819	2.13975	5.41786	3.27811	5.14843	21.7415	2.90368		UP
comp25635_c0_seq1	745	23.6253	38.5664	1774.14	-0.707014	-6.23065	-5.52363	0	48.2148	41.4148		DOWN	DOWN
comp25639_c0_seq1	628	11.501	1e-05	0.305238	20.1333	5.23569	-14.8976	10.5659	9.85376	0	UP	UP
comp25652_c0_seq1	392	25.7955	53.6049	157.868	-1.05524	-2.61353	-1.55828	0	13.1238	4.44666		DOWN
comp25697_c0_seq1	253	4.60534	1e-05	1e-05	18.8129	18.8129	0	6.30384	8.02123	0		UP
comp2571_c0_seq1	857	8.58898	3.52158	0.12095	1.28626	6.15	4.86374	0	8.76978	2.38217		UP
comp25721_c0_seq1	864	9.50278	0.45058	0.0357695	4.39849	8.05347	3.65498	13.1713	17.6248	0	UP	UP
comp25722_c0_seq1	260	19.9147	3.24526	0.245756	2.61743	6.34047	3.72304	1.4098	8.84779	0.827199		UP
comp25723_c0_seq1	350	15.3673	2.81934	1.50077	2.44644	3.3561	0.909662	6.02412	11.045	0		UP
comp25735_c0_seq1	288	15.2272	9.63852	77.8218	0.659766	-2.35353	-3.01329	0	6.65326	11.7415			DOWN
comp25742_c0_seq1	271	8.58109	18.4701	2.98999	-1.10596	1.52102	2.62698	0	2.32672	8.49129			UP
comp25744_c0_seq1	841	9.18143	6.16489	31.7928	0.574644	-1.79191	-2.36655	0	5.69431	10.377			DOWN
comp25754_c0_seq1	517	7.71989	0.0904397	0.0298887	6.41548	8.01284	1.59736	8.44636	10.1635	0	UP	UP
comp25761_c0_seq1	608	9.53498	5.57961	0.65671	0.773066	3.8599	3.08683	0.13113	11.9342	3.64037		UP
comp25801_c0_seq1	458	5.67397	43.2927	708.904	-2.93169	-6.96509	-4.03339	6.81382	48.2148	21.4425		DOWN	DOWN
comp25858_c0_seq1	744	11.2494	1.06062	0.607655	3.40687	4.21045	0.803583	10.201	13.9799	0	UP	UP
comp25866_c0_seq1	471	13.8243	0.314359	0.259227	5.45865	5.73684	0.278195	8.45949	10.1823	0	UP	UP
comp25871_c0_seq1	253	6.83795	4.37871	35.1342	0.643058	-2.36124	-3.0043	0	6.2629	10.8806			DOWN
comp2589_c0_seq1	206	11.7107	5.32933	0.593383	1.1358	4.30272	3.16692	0	8.4566	1.67994		UP
comp25906_c0_seq1	220	15.0832	12.6608	1.17892	0.252572	3.6774	3.42483	0	9.88582	6.44041		UP
comp25908_c0_seq1	604	5.68108	0.557145	1e-05	3.35004	19.1158	15.7658	4.70056	11.1168	0		UP
comp25932_c0_seq1	278	6.49131	1e-05	1e-05	19.3081	19.3081	0	9.69141	11.4533	0	UP	UP
comp2596_c0_seq1	408	1.79306	2.33557	13.5846	-0.381356	-2.92148	-2.54013	0	8.18807	6.25752		DOWN
comp25971_c0_seq1	373	4.95989	2.0143	28.6852	1.30003	-2.53193	-3.83195	0.094642	7.66337	17.2095		DOWN	DOWN
comp26029_c0_seq1	719	3.73603	27.1267	148.361	-2.86014	-5.31146	-2.45132	6.49894	36.3316	10.2997		DOWN	DOWN
comp26033_c0_seq1	760	7.36459	118.419	591.127	-4.00715	-6.32672	-2.31957	17.7931	46.0499	7.76871	DOWN	DOWN	DOWN
comp26036_c0_seq1	554	16.8313	4.1319	0.377971	2.02627	5.47673	3.45046	4.61011	19.4138	2.50075		UP
comp26091_c0_seq1	486	9.29457	15.8884	353.886	-0.773517	-5.25075	-4.47724	0	37.4521	30.809		DOWN	DOWN
comp26106_c0_seq1	1038	8.63227	4.82969	0.741944	0.837808	3.54036	2.70255	0	8.22122	1.87248		UP
comp26136_c0_seq1	887	6.68169	0.730428	0.297298	3.1934	4.49023	1.29683	5.50743	9.20153	0		UP
comp26180_c0_seq1	485	4.94991	8.37228	27.9584	-0.75822	-2.49781	-1.73959	0	9.93605	5.42572		DOWN
comp2619_c0_seq1	631	4.16413	7.37398	195.555	-0.824428	-5.55341	-4.72899	0	13.0702	9.39271		DOWN	DOWN
comp26218_c0_seq1	836	5.73393	0.16188	0.0394636	5.14652	7.18286	2.03633	9.48553	11.229	0	UP	UP
comp26222_c0_seq1	438	2.90619	2.78436	26.8392	0.0617798	-3.20714	-3.26892	0	13.3874	14.5139		DOWN	DOWN
comp26239_c0_seq1	228	3.22748	0.410141	11.1398	2.97622	-1.78724	-4.76345	1.11104	1.79044	9.71607			DOWN
comp26338_c0_seq1	538	7.51495	10.8401	0.910715	-0.528544	3.04469	3.57324	0	7.24052	9.37977			UP
comp26354_c0_seq1	455	4.30448	3.67224	30.5885	0.229178	-2.82908	-3.05825	0	7.41717	8.63721			DOWN
comp26368_c0_seq1	362	17.1783	3.39273	0.133823	2.34007	7.00412	4.66405	5.4229	21.2439	2.56343		UP
comp26392_c0_seq1	298	3.02967	19.9862	176.268	-2.72177	-5.86247	-3.1407	1.2744	17.172	5.88229		DOWN
comp26405_c0_seq1	294	1.93434	0.0795192	13.7134	4.60439	-2.82568	-7.43007	0.532104	8.06183	20.2005		DOWN	DOWN
comp26412_c0_seq1	810	6.20264	1.06727	0.172041	2.53896	5.17205	2.63309	3.23798	10.7536	0		UP
comp26432_c0_seq1	317	7.70077	11.3299	38.342	-0.557064	-2.31585	-1.75879	0	8.90152	5.69893		DOWN
comp26497_c0_seq1	334	7.03076	50.2048	265.59	-2.83607	-5.23938	-2.4033	7.38533	35.7582	9.37377		DOWN	DOWN
comp26521_c0_seq1	262	2.35637	9.17198	24.924	-1.96066	-3.40289	-1.44223	0.814617	11.5805	1.9928		DOWN
comp26524_c0_seq1	977	8.51407	17.9244	78.956	-1.07401	-3.21313	-2.13912	0	11.2093	5.07165		DOWN
comp26532_c0_seq1	204	11.5289	7.4127	1e-05	0.63718	20.1368	19.4996	0	11.9767	7.2456		UP
comp2655_c0_seq1	443	2.74303	11.0564	27.5623	-2.01103	-3.32885	-1.31782	1.31441	13.6981	2.33922		DOWN
comp26553_c0_seq1	683	11.8802	1.37959	0.278015	3.10625	5.41725	2.311	7.39294	14.6109	0		UP
comp26575_c0_seq1	319	32.4428	89.3264	4.30904	-1.46119	2.91246	4.37365	0	5.76541	11.2341			UP
comp2665_c0_seq1	619	7.10763	1e-05	1e-05	19.439	19.439	0	6.48744	8.23135	0		UP
comp26650_c0_seq1	1134	3.03341	0.0893328	9.01015	5.08561	-1.57061	-6.65622	2.54455	1.82934	13.085			DOWN
comp26659_c0_seq1	303	4.58288	5.16556	62.146	-0.17267	-3.76133	-3.58866	0	17.1489	17.398		DOWN	DOWN
comp26675_c0_seq1	717	4.28674	12.7921	29.2675	-1.5773	-2.77135	-1.19404	1.06046	13.5859	2.62533		DOWN
comp26680_c0_seq1	468	5.632	0.0333012	0.273062	7.40193	4.36635	-3.03558	8.2479	7.37122	0	UP
comp26698_c0_seq1	381	3.15391	3.91736	26.1989	-0.312739	-3.05429	-2.74155	0	12.3399	11.2791		DOWN	DOWN
comp26730_c0_seq1	468	4.8329	8.63269	31.2336	-0.836921	-2.69214	-1.85522	0	11.0593	5.92382		DOWN
comp26736_c0_seq1	760	5.8595	2.77885	0.264057	1.07629	4.47186	3.39557	0.188888	8.28538	1.249		UP
comp2674_c0_seq2	260	1.23834	1.21387	191.964	0.0287962	-7.27628	-7.30507	0	47.3341	47.7738		DOWN	DOWN
comp26754_c0_seq1	434	3.05276	24.1409	40.6345	-2.9833	-3.73452	-0.751224	7.24539	15.8263	0.200393		DOWN
comp26767_c0_seq1	306	9.69422	1e-05	0.298011	19.8868	5.02369	-14.8631	8.66187	8.03144	0	UP	UP
comp26775_c0_seq1	349	4.67727	5.16128	50.0116	-0.142065	-3.41853	-3.27646	0	11.3939	10.8806		DOWN	DOWN
comp26793_c0_seq1	299	5.41865	8.52705	38.2006	-0.654115	-2.81759	-2.16348	0	13.5395	8.47244		DOWN	DOWN
comp26800_c0_seq1	219	4.87034	12.1345	81.6203	-1.31702	-4.06683	-2.74982	0	15.0827	7.36977		DOWN
comp26838_c0_seq1	247	103.876	2.05586	1e-05	5.65898	23.3084	17.6494	30.856	45.8715	1.10431	UP	UP
comp26854_c0_seq1	613	6.44554	2.86334	0.0504158	1.1706	6.99828	5.82768	0.324201	11.5324	2.41721		UP
comp2686_c0_seq1	1667	22.7587	1.47755	0.565562	3.94514	5.33059	1.38545	14.4524	19.9408	0	UP	UP
comp26878_c0_seq1	659	3.64929	17.8268	208.922	-2.28836	-5.83921	-3.55085	2.44802	38.0673	18.3984		DOWN	DOWN
comp26907_c0_seq1	372	2.9947	0.125692	24.2853	4.57445	-3.0196	-7.59405	2.53362	12.4	31.1531		DOWN	DOWN
comp26941_c0_seq1	837	7.12759	2.61334	0.0369234	1.44752	7.59274	6.14522	0.173902	8.97233	1.52821		UP
comp26967_c0_seq1	211	3.3949	0.0663231	7.48725	5.67772	-1.14107	-6.81878	3.35654	0.639967	11.1006			DOWN
comp27009_c0_seq1	245	16.5988	4.15818	0.23755	1.99705	6.1267	4.12965	1.82415	13.4602	2.01423		UP
comp27085_c0_seq1	393	3.08084	7.12199	41.2689	-1.20896	-3.74366	-2.5347	0	20.281	11.0343		DOWN	DOWN
comp27102_c0_seq1	350	2.60942	8.08339	41.8145	-1.63123	-4.0022	-2.37097	0.101037	19.2257	8.25242		DOWN	DOWN
comp27112_c0_seq1	443	5.6875	2.86125	0.0656881	0.991149	6.43602	5.44487	0	10.3153	2.52782		UP
comp27124_c0_seq1	354	7.89734	1.32591	1e-05	2.57438	19.591	17.0166	3.88139	11.3514	0.376629		UP
comp27142_c0_seq1	363	3.94979	10.2848	20.2153	-1.38067	-2.3556	-0.974931	0.11519	8.52824	1.332		DOWN
comp27172_c0_seq1	740	4.51286	1e-05	1e-05	18.7837	18.7837	0	6.30384	8.02123	0		UP
comp27179_c0_seq1	215	10.7857	5.72466	0.83019	0.913858	3.69953	2.78568	0	7.71673	2.24245		UP
comp27184_c0_seq1	489	30.3458	1.96559	0.595089	3.94847	5.67225	1.72378	3.86018	7.83426	0		UP
comp27204_c0_seq1	375	4.10181	5.45771	31.9076	-0.412037	-2.95957	-2.54753	0	8.07209	6.63099		DOWN
comp27223_c0_seq1	534	4.38085	0.345617	0.178058	3.66397	4.62079	0.956825	3.87099	7.951	0		UP
comp27228_c0_seq1	503	4.32242	10.7454	144.33	-1.31381	-5.06139	-3.74758	0	10.8095	5.98817		DOWN
comp27288_c0_seq1	285	2.38308	0.382797	18.1478	2.63818	-2.92889	-5.56707	0.219196	8.54676	19.5301		DOWN	DOWN
comp27345_c0_seq1	332	7.41877	10.572	222.982	-0.510993	-4.9096	-4.39861	0	23.5853	20.6614		DOWN	DOWN
comp27354_c0_seq1	465	3.46316	2.10641	25.1972	0.717303	-2.8631	-3.5804	0	5.66985	8.57266			DOWN
comp27399_c0_seq1	534	3.50517	8.34895	36.0115	-1.25211	-3.3609	-2.10879	0	14.7102	6.53136		DOWN
comp27402_c0_seq1	563	3.53269	0.387556	29.743	3.18829	-3.07371	-6.262	1.38812	8.70532	21.0249		DOWN	DOWN
comp27446_c0_seq1	242	5.87419	3.76477	42.502	0.641828	-2.85507	-3.4969	0	9.43689	14.867		DOWN	DOWN
comp27472_c0_seq1	318	10.4742	2.27988	0.414988	2.1998	4.65762	2.45782	3.19337	11.5045	0.316551		UP
comp2749_c0_seq1	774	2.5539	7.23845	28.3187	-1.50298	-3.47098	-1.968	0	16.385	6.861		DOWN
comp27508_c0_seq1	218	6.4767	22.1598	68.6866	-1.77461	-3.4067	-1.63209	1.14407	14.4943	3.23425		DOWN
comp27522_c0_seq1	369	7.39669	8.63253	45.9512	-0.222904	-2.63515	-2.41225	0	10.5096	8.97851		DOWN	DOWN
comp27602_c0_seq1	421	1.76261	0.259132	18.8841	2.76595	-3.42139	-6.18734	0	11.5465	19.2876		DOWN	DOWN
comp27607_c0_seq1	240	4.04593	7.19248	21.6478	-0.830019	-2.41968	-1.58966	0	10.0918	4.82167		DOWN
comp27616_c0_seq1	443	1.93308	6.93392	17.919	-1.84277	-3.21251	-1.36974	0.113276	7.67284	1.27499		DOWN
comp27622_c0_seq1	325	26.8829	12.7786	1.92004	1.07296	3.80748	2.73452	0	9.58313	2.77242		UP
comp27719_c0_seq1	430	9.14811	46.552	474.971	-2.3473	-5.69822	-3.35092	1.5373	22.2876	8.88703		DOWN	DOWN
comp27757_c0_seq1	799	2.05914	3.31606	16.3252	-0.687426	-2.98698	-2.29956	0	9.79171	6.88255		DOWN
comp27775_c0_seq1	701	6.18329	3.3242	0.171599	0.895368	5.17126	4.27589	0	10.1165	2.85604		UP
comp27808_c0_seq1	280	2.49167	12.8199	24.4365	-2.3632	-3.29385	-0.930655	1.61813	8.57221	0.458332		DOWN
comp27880_c0_seq1	349	3.32275	11.2674	19.1326	-1.7617	-2.52558	-0.763886	1.33917	8.22042	0.331314		DOWN
comp27902_c0_seq1	229	2.31398	8.97189	142.634	-1.95504	-5.9458	-3.99076	0.374679	28.6206	16.3577		DOWN	DOWN
comp27977_c0_seq1	540	3.86311	4.82583	25.0103	-0.321015	-2.69469	-2.37368	0	11.4085	10.3707		DOWN	DOWN
comp28073_c0_seq1	267	1.30509	2.30448	12.956	-0.82029	-3.3114	-2.4911	0	10.4731	7.1179		DOWN
comp28092_c0_seq1	295	2.99324	10.8246	21.7144	-1.85453	-2.85887	-1.00434	1.20737	9.45404	1.17172		DOWN
comp28107_c0_seq1	496	2.05645	2.166	15.7988	-0.0748796	-2.94159	-2.86671	0	9.20153	9.23357		DOWN	DOWN
comp28222_c0_seq1	312	15.1291	6.29219	0.0990541	1.26569	7.25489	5.9892	0	11.7472	4.52662		UP
comp28223_c0_seq1	224	5.86188	1e-05	1e-05	19.161	19.161	0	8.53314	10.259	0	UP	UP
comp28257_c0_seq1	285	6.19878	13.845	0.427419	-1.15931	3.85826	5.01757	0	6.26869	12.6532			UP
comp28270_c0_seq1	227	6.56318	2.93538	91.3002	1.16085	-3.79815	-4.959	0	20.3171	28.8416		DOWN	DOWN
comp283_c0_seq1	251	1.62693	7.17854	14.0366	-2.14154	-3.10897	-0.967436	1.27932	8.59179	0.769183		DOWN
comp28309_c0_seq1	778	2.8815	4.67922	51.6142	-0.699448	-4.16288	-3.46343	0	23.191	18.9555		DOWN	DOWN
comp28311_c0_seq1	248	4.35475	4.88988	180.507	-0.167209	-5.37332	-5.20611	0	36.5069	36.1467		DOWN	DOWN
comp28409_c0_seq1	219	2.04128	3.63952	15.3105	-0.834278	-2.90697	-2.0727	0	9.00849	5.50256		DOWN
comp28485_c0_seq1	246	22.3955	25.2857	1.67937	-0.175111	3.73721	3.91233	0	12.9116	11.8312		UP	UP
comp28493_c0_seq1	369	0.97973	1e-05	40.0847	16.5801	-5.35452	-21.9346	0	28.5104	37.866		DOWN	DOWN
comp28539_c0_seq1	396	2.86991	14.4306	115.861	-2.33005	-5.33525	-3.0052	2.33568	34.9224	15.5661		DOWN	DOWN
comp28546_c0_seq1	261	16.8781	49.2879	3.39605	-1.54608	2.31322	3.8593	0.140606	4.20707	10.7103			UP
comp28548_c0_seq1	314	1.73131	0.148901	12.9379	3.53944	-2.90166	-6.44111	0.171765	3.6418	10.0845			DOWN
comp28583_c0_seq1	271	3.20385	9.43811	0.46542	-1.55869	2.7832	4.34189	0.153069	2.16339	8.29517			UP
comp28589_c0_seq1	432	17.5531	2.11046	1e-05	3.05609	20.7433	17.6872	1.30411	7.76669	0.57637		UP
comp28603_c0_seq1	425	2.98942	24.4804	39.6717	-3.03369	-3.73017	-0.696481	7.90735	16.3165	0.131048	DOWN	DOWN
comp28659_c0_seq1	460	3.46269	4.532	20.1606	-0.388258	-2.54157	-2.15331	0	9.00197	7.25386		DOWN
comp28755_c0_seq1	232	3.40576	10.4983	33.6398	-1.6241	-3.30412	-1.68002	0.395393	14.6198	4.94673		DOWN
comp2876_c0_seq1	245	1.00704	8.85017	64.9889	-3.13558	-6.01199	-2.87642	1.91768	23.6408	8.39718		DOWN	DOWN
comp28870_c0_seq1	240	2.03889	0.610291	10.121	1.74022	-2.3115	-4.05171	0	3.60088	7.79182			DOWN
comp28892_c0_seq1	432	3.11846	3.78011	39.9082	-0.277593	-3.67778	-3.40019	0	19.4248	19.2361		DOWN	DOWN
comp28915_c0_seq1	275	12.1956	1e-05	0.105818	20.2179	6.84864	-13.3693	9.68526	11.4365	0	UP	UP
comp2897_c0_seq1	309	1.07343	0.504367	28.0503	1.08968	-4.70771	-5.7974	0	18.4766	23.4457		DOWN	DOWN
comp28974_c0_seq1	254	5.40691	33.4183	35.7249	-2.62776	-2.72405	-0.0962905	5.61172	8.91542	0		DOWN
comp29005_c0_seq1	490	3.96663	2.96719	41.7313	0.418818	-3.39514	-3.81396	0	12.616	15.8507		DOWN	DOWN
comp29016_c0_seq1	296	0.886636	0.500213	16.9735	0.825798	-4.2588	-5.08459	0	14.0293	17.1781		DOWN	DOWN
comp29130_c0_seq1	351	3.87585	8.42386	31.3665	-1.11997	-3.01664	-1.89667	0	15.8288	7.76329		DOWN	DOWN
comp29136_c0_seq1	246	4.63333	7.17744	23.9155	-0.63142	-2.36782	-1.7364	0	9.46182	5.61098		DOWN
comp29172_c0_seq1	1021	4.17761	5.00046	27.255	-0.259384	-2.70577	-2.44639	0	8.3199	7.33144		DOWN
comp29193_c0_seq1	366	6.42612	7.37749	78.2144	-0.199181	-3.60541	-3.40623	0	15.547	15.0056		DOWN	DOWN
comp29213_c0_seq1	230	5.92803	3.82528	0.130445	0.63199	5.50604	4.87405	0	7.6713	3.00376		UP
comp29222_c0_seq1	456	1.17509	2.04461	20.783	-0.799055	-4.14456	-3.34551	0	12.6669	9.21096		DOWN	DOWN
comp29227_c0_seq1	255	2.5902	0.317436	8.47092	3.02853	-1.70946	-4.73798	0.33596	1.99456	9.8115			DOWN
comp29284_c0_seq1	230	1.88523	1.01641	17.9677	0.891261	-3.25259	-4.14385	0	10.9949	15.7755		DOWN	DOWN
comp29331_c0_seq1	259	1.21924	10.2956	88.7969	-3.07797	-6.18645	-3.10848	2.19986	23.223	8.05971		DOWN	DOWN
comp29422_c0_seq1	281	1.83665	3.2986	14.1865	-0.844778	-2.94937	-2.10459	0	9.67482	5.79631		DOWN
comp29509_c0_seq1	245	5.2479	1.76844	15.6295	1.56926	-1.57446	-3.14372	0.167384	2.89002	11.1006			DOWN
comp29523_c0_seq1	437	3.07864	11.0247	31.892	-1.84037	-3.37283	-1.53246	0.682255	13.4007	2.94512		DOWN
comp29648_c0_seq1	210	1.69468	1e-05	33.2569	17.3707	-4.29457	-21.6652	0.429732	18.1643	29.6373		DOWN	DOWN
comp29677_c0_seq1	507	5.24943	6.96089	34.109	-0.407112	-2.69992	-2.29281	0	8.74092	6.77948		DOWN
comp29695_c0_seq1	322	0.905563	2.3233	14.7768	-1.35929	-4.02838	-2.66909	0	9.49006	4.67026		DOWN
comp29711_c0_seq1	369	4.11188	3.92768	58.4736	0.0661209	-3.82992	-3.89604	0	14.2906	15.3434		DOWN	DOWN
comp29765_c0_seq1	402	4.84747	1.79842	0.144775	1.4305	5.06534	3.63484	0.320925	8.34025	0.908651		UP
comp29783_c0_seq1	289	1.81976	5.95208	13.1883	-1.70964	-2.85744	-1.1478	0.0930341	8.35018	1.2672		DOWN
comp29788_c0_seq1	511	5.31294	7.54968	71.6857	-0.506905	-3.7541	-3.2472	0	20.5483	16.6739		DOWN	DOWN
comp29820_c0_seq1	253	11.5232	2.28426	1e-05	2.33474	20.1361	17.8014	3.34719	14.3302	1.54901		UP
comp29880_c0_seq1	308	3.98085	0.685445	16.6325	2.53796	-2.06286	-4.60082	0.456729	2.16105	8.93741			DOWN
comp29954_c0_seq1	289	2.00334	8.79918	20.3927	-2.13497	-3.34758	-1.21261	1.14466	9.17874	0.795934		DOWN
comp2999_c0_seq1	320	1.84562	2.55596	19.5151	-0.469759	-3.40241	-2.93265	0	12.4384	11.3856		DOWN	DOWN
comp30031_c0_seq1	338	2.38139	4.83438	32.1207	-1.02153	-3.75363	-2.7321	0	16.0521	10.4586		DOWN	DOWN
comp30128_c0_seq1	565	3.00058	4.16055	29.7772	-0.471533	-3.3109	-2.83936	0	13.1386	10.3886		DOWN	DOWN
comp30170_c0_seq1	460	2.12087	5.59521	16.7757	-1.39953	-2.98365	-1.58411	0	11.544	4.18493		DOWN
comp30172_c0_seq1	427	8.0438	8.34829	45.77	-0.0536031	-2.50845	-2.45485	0	8.01663	8.15824		DOWN	DOWN
comp30182_c0_seq1	218	2.79122	3.45128	83.1739	-0.306237	-4.89716	-4.59093	0	32.1616	29.5031		DOWN	DOWN
comp30210_c0_seq1	241	5.74482	39.2486	38.3153	-2.77231	-2.73759	0.0347181	6.94895	8.76022	0		DOWN
comp30234_c0_seq1	214	2.03285	1.59402	10.2035	0.350832	-2.32749	-2.67832	0	5.56594	7.98852			DOWN
comp30299_c0_seq1	565	5.63607	13.9546	32.0978	-1.30798	-2.50971	-1.20174	0	8.75517	1.90129		DOWN
comp30351_c0_seq1	264	3.79826	7.76103	40.7338	-1.03091	-3.42282	-2.39191	0	12.3283	6.6346		DOWN
comp30368_c0_seq1	227	0.996657	2.11296	110.213	-1.08409	-6.78898	-5.70488	0	34.9662	30.6009		DOWN	DOWN
comp30386_c0_seq1	551	2.56425	18.3582	23.8484	-2.83982	-3.21729	-0.377466	7.6546	14.199	0	DOWN	DOWN
comp30392_c0_seq1	296	22.3432	54.5323	4.13477	-1.28728	2.43396	3.72123	0	4.11609	8.42742			UP
comp30465_c0_seq1	241	0.883428	0.487977	7.60404	0.8563	-3.10558	-3.96188	0	5.57199	7.83293			DOWN
comp30500_c0_seq1	376	1.23254	1e-05	10.7142	16.9113	-3.11982	-20.0311	0	4.34001	9.25526			DOWN
comp30521_c0_seq1	231	2.86424	5.59161	191.908	-0.965114	-6.06612	-5.10101	0	39.9257	33.2242		DOWN	DOWN
comp30563_c0_seq1	290	6.98167	1.36135	1e-05	2.35853	19.4132	17.0547	2.50239	11.0318	0.397567		UP
comp3063_c0_seq1	858	16.2631	2.79433	8.55266	2.54103	0.927157	-1.61387	7.70775	1.52476	1.57008	UP
comp30633_c0_seq1	262	2.84237	1.93962	457.91	0.551319	-7.33183	-7.88314	0	39.0651	42.1627		DOWN	DOWN
comp30663_c0_seq1	271	7.22688	13.1715	1.1815	-0.865981	2.61275	3.47873	0	4.32869	8.01251			UP
comp30757_c0_seq1	415	9.45633	25.4811	801.308	-1.43007	-6.40493	-4.97486	0.331523	49.8	35.6322		DOWN	DOWN
comp30762_c0_seq1	561	7.60182	0.0498901	1e-05	7.25145	19.536	12.2845	9.13678	10.8971	0	UP	UP
comp30787_c0_seq1	224	2.34268	1.64073	15.2576	0.513824	-2.7033	-3.21712	0	9.99586	12.8495		DOWN	DOWN
comp30799_c0_seq1	311	2.7596	8.64338	36.313	-1.64713	-3.71796	-2.07082	0.219196	20.0624	7.79182		DOWN	DOWN
comp3091_c0_seq1	508	44.078	36.5052	4.59117	0.271958	3.26313	2.99117	0	11.2276	7.18585		UP
comp30966_c0_seq1	221	1.48014	0.95205	16.8347	0.636624	-3.50763	-4.14426	0	12.5167	14.7422		DOWN	DOWN
comp30981_c0_seq1	232	3.32196	3.11554	38.093	0.0925534	-3.51942	-3.61197	0	18.3303	19.265		DOWN	DOWN
comp31088_c0_seq1	320	2.71385	3.896	24.8929	-0.521655	-3.19732	-2.67567	0	14.4967	11.3778		DOWN	DOWN
comp31093_c0_seq1	311	0.606493	2.89322	12.0117	-2.25411	-4.30781	-2.0537	0	10.3949	3.38786		DOWN
comp3116_c0_seq1	383	8.44611	5.92631	0.0861399	0.511152	6.61546	6.10431	0	13.0356	7.1951		UP
comp31186_c0_seq1	205	1.45907	5.76624	97.1192	-1.98259	-6.05664	-4.07405	0.235143	41.4895	27.1507		DOWN	DOWN
comp31264_c0_seq1	217	0.65191	2.14685	42.0904	-1.71947	-6.01267	-4.2932	0	14.7074	9.98069		DOWN	DOWN
comp31325_c0_seq1	364	2.91154	4.5251	73.4466	-0.636166	-4.65684	-4.02067	0	22.2706	18.4606		DOWN	DOWN
comp31595_c0_seq1	214	1.59084	5.06473	23.1058	-1.6707	-3.8604	-2.1897	0	12.6919	5.95026		DOWN
comp31600_c0_seq1	234	2.43833	3.48012	97.8527	-0.513244	-5.32665	-4.8134	0	13.8378	11.082		DOWN	DOWN
comp31603_c0_seq1	203	5.45519	0.544459	0.16252	3.32473	5.06894	1.74421	4.86845	9.07875	0		UP
comp31615_c0_seq1	254	0.995714	0.0920419	8.10655	3.43537	-3.02529	-6.46065	0	3.4993	8.69259			DOWN
comp31627_c0_seq1	463	3.88955	15.7096	113.673	-2.01397	-4.86915	-2.85517	0.0247569	8.75517	2.50187		DOWN
comp3164_c0_seq1	429	1.62783	0.145314	10.7313	3.4857	-2.72081	-6.20651	0.101037	6.3501	16.57			DOWN
comp31687_c0_seq1	207	3.54416	3.75871	31.2632	-0.0847921	-3.14095	-3.05616	0	14.9632	15.8507		DOWN	DOWN
comp31704_c0_seq1	239	4.68931	1.60959	0.13804	1.54269	5.08622	3.54353	0.688633	7.84287	0.433105		UP
comp3179_c0_seq1	220	16.6336	100.403	357.139	-2.59363	-4.42431	-1.83068	4.61437	19.5586	2.93529		DOWN
comp31850_c0_seq1	202	3.39235	9.00414	0.883618	-1.4083	1.94079	3.34909	0.374154	1.90959	8.71349			UP
comp31943_c0_seq1	448	2.58121	2.77652	17.3415	-0.105234	-2.74811	-2.64287	0	7.85223	7.71081		DOWN	DOWN
comp3195_c0_seq1	318	10.2671	1.37023	1e-05	2.90554	19.9696	17.0641	5.4229	13.1985	0.364108		UP
comp31957_c0_seq1	268	2.95818	4.44428	71.8117	-0.58724	-4.60144	-4.0142	0	24.9534	20.8581		DOWN	DOWN
comp31962_c0_seq1	217	2.78736	1.51153	23.6302	0.882885	-3.08366	-3.96654	0	7.66379	11.2055		DOWN	DOWN
comp32044_c0_seq1	260	1.4435	0.215295	48.2059	2.74518	-5.06157	-7.80675	0	30.7304	42.3419		DOWN	DOWN
comp32072_c0_seq1	246	6.83221	2.22929	1e-05	1.61577	19.382	17.7662	0.200481	7.9042	1.05317		UP
comp3210_c0_seq1	470	5.77577	3.48881	0.202304	0.727277	4.83542	4.10814	0	8.75299	1.7946		UP
comp32104_c0_seq1	293	4.27725	18.2721	76.4029	-2.09489	-4.15887	-2.06398	1.18385	15.7992	4.25816		DOWN
comp32109_c0_seq1	300	1.4362	5.40795	23.0785	-1.91282	-4.00622	-2.0934	0	9.84547	3.47175		DOWN
comp32116_c0_seq1	421	0.761404	0.140518	30.0443	2.4379	-5.30228	-7.74019	0	28.4946	36.2648		DOWN	DOWN
comp32178_c0_seq1	540	5.13692	4.98173	36.8617	0.0442555	-2.84315	-2.8874	0	8.53379	9.1636		DOWN	DOWN
comp32197_c0_seq1	224	1.54238	3.7727	18.6048	-1.29044	-3.59244	-2.302	0	11.1598	5.07165		DOWN
comp32201_c0_seq1	357	1.66951	0.152797	40.024	3.44973	-4.58337	-8.0331	0.0380429	24.1889	36.812		DOWN	DOWN
comp32317_c0_seq1	450	4.41188	8.06629	34.8835	-0.87051	-2.98308	-2.11257	0	8.93515	4.63512		DOWN
comp32511_c0_seq1	276	12.2944	1.10195	1e-05	3.47987	20.2296	16.7497	2.49312	8.28538	0		UP
comp32547_c0_seq1	205	0.383373	2.10978	103.24	-2.46027	-8.07304	-5.61277	0	33.9152	25.0404		DOWN	DOWN
comp32576_c0_seq1	226	164.206	121.233	26.1504	0.437726	2.6506	2.21287	0	10.8352	5.4162		UP
comp32632_c0_seq1	613	41.9852	24.119	1.0878	0.799714	5.27039	4.47068	0	22.9568	12.7379		UP	UP
comp32635_c0_seq1	216	3.15615	5.81076	27.8542	-0.880564	-3.14166	-2.26109	0	11.8654	7.29181		DOWN
comp32657_c0_seq1	236	2.00923	2.00373	13.2988	0.00395478	-2.72659	-2.73054	0	8.85489	7.81566		DOWN	DOWN
comp32669_c0_seq1	247	2.07014	5.68224	16.6723	-1.45673	-3.00966	-1.55292	0	8.66806	2.5701		DOWN
comp32682_c0_seq1	241	1.68416	4.80652	51.1049	-1.51296	-4.92336	-3.4104	0	28.5497	18.9591		DOWN	DOWN
comp3271_c0_seq1	479	11.3918	55.2183	147.169	-2.27715	-3.6914	-1.41425	1.22258	8.66618	0.869294		DOWN
comp32846_c0_seq1	246	1.24103	1.56959	16.6542	-0.338848	-3.74628	-3.40743	0	10.9183	9.83513		DOWN	DOWN
comp32994_c0_seq1	320	1.7914	1e-05	8.48982	17.4507	-2.24465	-19.6954	0.628807	4.8867	14.8217			DOWN
comp3302_c0_seq1	205	10.3131	0.421634	1e-05	4.61235	19.976	15.3637	10.0504	14.7536	0	UP	UP
comp33078_c0_seq1	326	4.20574	15.3721	189.389	-1.86988	-5.49285	-3.62297	0.584721	27.9863	14.7694		DOWN	DOWN
comp33119_c0_seq1	347	3.57267	26.0092	74.8994	-2.86395	-4.38988	-1.52593	4.89977	20.2161	2.55124		DOWN
comp33132_c0_seq1	271	1.35924	10.5643	13.4861	-2.95832	-3.3106	-0.352285	3.80938	9.10513	0		DOWN
comp33359_c0_seq1	249	2.56609	2.14598	59.448	0.257935	-4.53398	-4.79192	0	24.4659	27.0118		DOWN	DOWN
comp3340_c0_seq1	510	2.82233	8.86084	24.2205	-1.65056	-3.10127	-1.45072	0.155466	12.2474	3.1186		DOWN
comp33403_c0_seq1	346	2.3965	4.51051	15.9238	-0.912359	-2.73218	-1.81982	0	9.25088	5.15714		DOWN
comp33415_c0_seq1	216	0.829104	12.7716	23.1481	-3.94525	-4.8032	-0.857953	7.76542	17.3694	0.342866	DOWN	DOWN
comp33430_c0_seq1	345	6.01051	4.91623	297.636	0.289935	-5.62992	-5.91985	0	15.7623	16.3577		DOWN	DOWN
comp33596_c0_seq1	331	1.27746	0.310367	6.91851	2.04123	-2.43718	-4.47841	0	4.7178	8.41092			DOWN
comp3361_c0_seq1	533	1.91389	7.76292	16.1735	-2.02009	-3.07905	-1.05896	1.19861	9.43383	1.08577		DOWN
comp33734_c0_seq1	215	2.98784	13.8027	43.6842	-2.20777	-3.86994	-1.66216	1.22875	13.1326	2.47884		DOWN
comp33778_c0_seq1	380	1.51129	2.43196	36.3887	-0.686335	-4.58964	-3.9033	0	22.8115	18.7416		DOWN	DOWN
comp33871_c0_seq1	227	185.484	47.6532	3.97996	1.96065	5.5424	3.58175	0.430333	11.1968	3.62924		UP
comp33917_c0_seq1	265	3.13617	2.95534	66.6323	0.0856779	-4.40915	-4.49483	0	10.6329	10.6695		DOWN	DOWN
comp33939_c0_seq1	246	7.03432	1.63163	1e-05	2.10809	19.4241	17.316	1.14407	7.95659	0.335275		UP
comp33972_c0_seq1	246	0.821334	2.53152	12.2974	-1.62397	-3.90424	-2.28028	0	11.514	5.6586		DOWN
comp33992_c0_seq1	327	21.4488	7.00681	2.6054	1.61406	3.04132	1.42725	4.7607	15.2265	0.75916		UP
comp34002_c0_seq1	233	1.92348	9.70871	14.3079	-2.33556	-2.89502	-0.55946	2.44802	8.75517	0.102305		DOWN
comp3415_c0_seq1	555	3.00834	10.3334	208.302	-1.78028	-6.11357	-4.33329	0.393911	44.3315	28.9685		DOWN	DOWN
comp34213_c0_seq1	652	2.49367	2.55317	63.2728	-0.0340218	-4.66525	-4.63122	0	24.6805	24.5928		DOWN	DOWN
comp3436_c0_seq1	366	6.77311	1.36717	0.169649	2.30863	5.3192	3.01057	1.2744	8.30016	0.345843		UP
comp34427_c0_seq1	267	1.3168	8.92611	18.1364	-2.761	-3.78379	-1.02279	2.33568	11.3272	0.746596		DOWN
comp34453_c0_seq1	490	1.40045	5.2946	686.88	-1.91863	-8.93802	-7.01939	0.113276	67.8396	54.7497		DOWN	DOWN
comp34474_c0_seq1	223	4.01982	6.92992	26.2773	-0.785707	-2.70861	-1.92291	0	11.1558	6.35517		DOWN
comp34577_c0_seq1	368	2.1999	6.51634	43.957	-1.56663	-4.32059	-2.75396	0	15.8934	7.42623		DOWN
comp34595_c0_seq1	322	1.49067	5.84851	32.6215	-1.97211	-4.45179	-2.47968	0.106919	21.7444	9.5627		DOWN	DOWN
comp34692_c0_seq1	241	1.6383	81.2369	69.4256	-5.63186	-5.4052	0.226667	19.6473	20.018	0	DOWN	DOWN
comp3489_c0_seq1	551	4.25459	24.5562	365.733	-2.52899	-6.42562	-3.89663	1.55169	24.8216	11.1706		DOWN	DOWN
comp3491_c0_seq1	576	8.66286	13.2337	44.9811	-0.611296	-2.3764	-1.76511	0	8.95688	5.44306		DOWN
comp34912_c0_seq1	222	1.0963	2.11972	10.3458	-0.951231	-3.23833	-2.2871	0	7.71673	4.7064		DOWN
comp34916_c0_seq1	302	1.46541	8.71086	80.3959	-2.57151	-5.77775	-3.20623	1.36459	26.7213	11.4264		DOWN	DOWN
comp34930_c0_seq1	279	1.21889	0.754141	35.5579	0.692665	-4.86653	-5.55919	0	23.0393	27.5065		DOWN	DOWN
comp34983_c0_seq1	238	1.15547	3.57284	19.0309	-1.62859	-4.04179	-2.4132	0	18.3964	9.30572		DOWN	DOWN
comp3500_c0_seq1	548	5.21514	16.028	32.2236	-1.61982	-2.62734	-1.00752	0.901006	8.50369	0.761739		DOWN
comp35070_c0_seq1	218	1.7692	17.2085	23.7246	-3.28195	-3.74521	-0.463259	4.59514	9.79253	0		DOWN
comp35113_c0_seq1	329	10.8647	1e-05	1e-05	20.0512	20.0512	0	8.9751	10.7346	0	UP	UP
comp35134_c0_seq1	271	26.1183	6.8617	0.772678	1.92843	5.07905	3.15063	0.457473	7.76857	1.39644		UP
comp35216_c0_seq1	304	1.70551	2.72077	46.2432	-0.673816	-4.76097	-4.08715	0	30.4452	27.3596		DOWN	DOWN
comp35248_c0_seq1	400	1.64218	1.47225	13.7294	0.157587	-3.06358	-3.22117	0	9.56768	11.2493		DOWN	DOWN
comp35279_c0_seq1	235	1.38142	0.775551	7.91002	0.83286	-2.51753	-3.35039	0	4.62128	7.6629			DOWN
comp35359_c0_seq1	247	0.745102	1.24845	31.3176	-0.744628	-5.39339	-4.64876	0	9.38208	7.38753		DOWN
comp35420_c0_seq1	257	0.852496	1e-05	10.045	16.3794	-3.55864	-19.938	0	9.67475	15.8468		DOWN	DOWN
comp35608_c0_seq1	239	1.69464	5.69883	13.7727	-1.74969	-3.02276	-1.27307	0.393563	10.3431	2.28483		DOWN
comp35707_c0_seq1	342	2.68825	3.5573	37.6912	-0.404117	-3.80949	-3.40537	0	21.8982	19.454		DOWN	DOWN
comp3577_c0_seq1	209	7.49182	5.47522	0.835402	0.452401	3.16477	2.71237	0	7.72231	3.28253		UP
comp35780_c0_seq1	267	1.38494	7.21553	19.5827	-2.38128	-3.82168	-1.4404	1.01505	8.92565	1.40451		DOWN
comp35872_c0_seq1	214	1.75466	0.619034	9.15598	1.5031	-2.38352	-3.88662	0	5.23434	9.66279			DOWN
comp35911_c0_seq1	270	1.5929	0.115444	510.589	3.78639	-8.32436	-12.1108	0	65.4222	79.1378		DOWN	DOWN
comp35956_c0_seq1	231	0.465994	0.758322	7.55408	-0.702497	-4.01887	-3.31637	0	9.01248	7.98468		DOWN	DOWN
comp35968_c0_seq1	240	2.53098	3.19693	99.9845	-0.336992	-5.30394	-4.96695	0	31.1494	27.4279		DOWN	DOWN
comp3600_c0_seq1	842	7.54819	3.96752	196.56	0.927892	-4.70269	-5.63059	0	32.9346	42.5769		DOWN	DOWN
comp36272_c0_seq1	253	2.21867	6.21094	91.05	-1.48512	-5.35889	-3.87378	0	31.5894	21.8049		DOWN	DOWN
comp36521_c0_seq1	216	1.28019	1e-05	5.57611	16.966	-2.1229	-19.0889	0	2.87072	8.6013			DOWN
comp36633_c0_seq1	264	1.7496	2.98425	14.715	-0.770343	-3.07219	-2.30185	0	7.71247	5.12455		DOWN
comp3664_c0_seq1	341	5.62122	10.5472	0.0853368	-0.907903	6.04157	6.94947	0	8.80641	14.7184		UP	UP
comp36707_c0_seq1	234	1.32055	2.15033	13.6248	-0.703418	-3.36703	-2.66361	0	9.54053	7.36573		DOWN
comp36718_c0_seq1	207	2.14389	3.04691	38.5271	-0.507117	-4.16757	-3.66045	0	27.1348	24.2464		DOWN	DOWN
comp36750_c0_seq1	322	1.15134	0.883322	32.6085	0.3823	-4.82387	-5.20617	0	18.8574	21.1985		DOWN	DOWN
comp36969_c0_seq1	224	0.831829	1e-05	22.299	16.344	-4.74455	-21.0885	0	20.1963	27.1179		DOWN	DOWN
comp37034_c0_seq1	283	0.538574	0.489447	8.98533	0.13799	-4.06036	-4.19835	0	9.45156	10.5375		DOWN	DOWN
comp3704_c0_seq1	1086	1.77333	11.6162	144.443	-2.7116	-6.3479	-3.6363	2.91651	39.5859	18.2987		DOWN	DOWN
comp37086_c0_seq1	303	0.944074	9.55296	31.4147	-3.33898	-5.05639	-1.71742	1.88556	11.2921	1.31433		DOWN
comp3710_c0_seq1	511	7.38634	5.52328	23.5598	0.419334	-1.6734	-2.09273	0	4.64416	8.25031			DOWN
comp37231_c0_seq1	205	2.64895	3.92689	38.0507	-0.567965	-3.84443	-3.27647	0	22.3747	18.8145		DOWN	DOWN
comp37343_c0_seq1	305	1.25611	8.6652	13.3383	-2.78626	-3.40853	-0.622268	3.2421	9.94019	0.0516006		DOWN
comp3738_c0_seq1	487	7.58897	0.121475	1e-05	5.96518	19.5335	13.5684	13.7973	15.5843	0	UP	UP
comp3746_c0_seq1	511	9.76947	27.4811	305.392	-1.49209	-4.96624	-3.47415	0.188888	27.8911	15.5661		DOWN	DOWN
comp37518_c0_seq1	204	3.87731	14.6004	36.6056	-1.91288	-3.23894	-1.32606	0.307743	7.71804	1.07676		DOWN
comp3753_c0_seq1	756	5.04855	60.9514	95.3365	-3.59372	-4.23909	-0.645368	9.74225	16.6279	0	DOWN	DOWN
comp37625_c0_seq1	283	9.13372	0.220282	1e-05	5.37378	19.8008	14.4271	5.56557	9.59632	0		UP
comp37763_c0_seq1	216	2.28034	3.30137	14.389	-0.533815	-2.65764	-2.12383	0	8.62521	5.8886		DOWN
comp37818_c0_seq1	242	2.84853	8.39218	100.906	-1.55883	-5.14665	-3.58782	0	22.4022	12.7128		DOWN	DOWN
comp37900_c0_seq1	258	0.793431	0.883585	7.93362	-0.155264	-3.3218	-3.16654	0	7.31442	7.93395			DOWN
comp3796_c0_seq1	302	19.08	13.0177	1.26703	0.551582	3.91254	3.36096	0	10.837	5.84718		UP
comp3808_c0_seq2	431	6.0435	0.845711	1e-05	2.83715	19.205	16.3679	4.74094	10.3588	0		UP
comp38095_c0_seq1	351	1.13681	6.20845	51.7761	-2.44924	-5.50922	-3.05998	0.843712	33.6349	16.9182		DOWN	DOWN
comp38119_c0_seq1	216	0.363849	0.887206	6.89593	-1.28593	-4.24433	-2.9584	0	8.96699	4.68419		DOWN
comp38166_c0_seq1	300	1.62502	6.35053	13.5457	-1.96642	-3.05931	-1.09289	0.891139	10.8425	1.64096		DOWN
comp38168_c0_seq1	249	9.39196	3.99113	0.0584334	1.23463	7.32849	6.09386	0	8.04253	2.67204		UP
comp38201_c0_seq1	269	1.13527	6.00386	20.5845	-2.40285	-4.18045	-1.77759	0.694642	14.1004	3.3245		DOWN
comp38226_c0_seq1	246	1.97711	10.1933	1031.18	-2.36615	-9.02669	-6.66053	1.96722	72.4743	51.9141		DOWN	DOWN
comp38339_c0_seq1	208	0.786774	3.84461	30.6665	-2.28881	-5.28457	-2.99575	0	27.9893	15.9057		DOWN	DOWN
comp3838_c0_seq1	1007	6.95817	16.1845	59.6676	-1.21783	-3.10017	-1.88233	0	15.8606	6.26871		DOWN
comp38392_c0_seq1	250	2.60422	5.67005	28.1472	-1.12251	-3.43407	-2.31156	0	14.3613	7.75687		DOWN	DOWN
comp38402_c0_seq1	262	1.3779	0.1041	18.083	3.72643	-3.71409	-7.44051	0.0905297	15.2509	25.9905		DOWN	DOWN
comp38418_c0_seq1	225	1.23366	2.10492	24.2811	-0.770822	-4.29882	-3.528	0	9.00197	6.3726		DOWN
comp38435_c0_seq1	255	1.50724	1.7718	13.8747	-0.233303	-3.20248	-2.96918	0	10.3441	9.25943		DOWN	DOWN
comp38476_c0_seq1	218	0.35526	0.898708	99.7974	-1.33898	-8.13399	-6.79501	0	41.4388	40.3319		DOWN	DOWN
comp3850_c0_seq1	424	8.02441	0.931497	0.0389052	3.10677	7.68829	4.58152	5.07057	13.1331	0.0516006		UP
comp38514_c0_seq1	203	10.4431	0.506079	1e-05	4.36705	19.9941	15.6271	13.2187	18.3016	0	UP	UP
comp38571_c0_seq1	256	0.700288	7.64958	34.5895	-3.44936	-5.62624	-2.17688	4.74094	29.8464	9.02556		DOWN	DOWN
comp38580_c0_seq1	287	1.88483	3.42963	20.737	-0.863617	-3.4597	-2.59609	0	15.7527	10.9893		DOWN	DOWN
comp3865_c0_seq1	1360	6.03382	1e-05	0.0712412	19.2027	6.40422	-12.7985	6.73902	8.47515	0		UP
comp38728_c0_seq1	205	8.96961	15.6513	57.62	-0.803162	-2.68345	-1.88029	0	12.5182	6.26259		DOWN
comp3874_c0_seq1	917	5.78611	0.366614	33.4311	3.98026	-2.53053	-6.51078	4.18378	6.86229	25.0404			DOWN
comp3894_c0_seq1	473	9.92831	1e-05	1e-05	19.9212	19.9212	0	16.6837	18.5661	0	UP	UP
comp39192_c0_seq1	272	1.72962	1.34473	20.159	0.363133	-3.5429	-3.90603	0	13.4602	17.1444		DOWN	DOWN
comp39201_c0_seq1	201	232.152	5.86519	2.75525	5.30675	6.39674	1.09	24.237	32.8811	0.0144591	UP	UP
comp39260_c0_seq1	217	0.289738	0.987574	12.9222	-1.76914	-5.47896	-3.70982	0	7.9588	4.52788		DOWN
comp39351_c0_seq1	314	0.612807	7.27614	17.7197	-3.56967	-4.85377	-1.28411	1.96998	8.26438	0.259216		DOWN
comp39357_c0_seq1	221	1.0401	0.323808	27.4056	1.68352	-4.71967	-6.40319	0	23.7323	29.5444		DOWN	DOWN
comp3958_c0_seq1	1375	13.9419	2.04275	1.06989	2.77084	3.70389	0.93305	4.10924	8.80641	0		UP
comp3967_c0_seq1	450	6.81172	8.03489	32.0817	-0.238259	-2.23566	-1.9974	0	9.2977	8.25731		DOWN	DOWN
comp39743_c0_seq1	205	4.85225	10.456	26.8224	-1.10761	-2.46671	-1.3591	0	8.8093	2.50183		DOWN
comp3977_c0_seq1	1299	6.10728	7.05838	0.181993	-0.208809	5.06857	5.27738	0	8.18607	7.79182		UP	UP
comp39818_c0_seq1	216	0.95431	2.24593	20.8591	-1.23478	-4.45007	-3.21529	0	14.3998	9.26845		DOWN	DOWN
comp39828_c0_seq1	238	0.508318	17.8287	41.7092	-5.13233	-6.35849	-1.22616	8.19549	18.6277	0.749809	DOWN	DOWN
comp3983_c0_seq1	670	7.41937	8.76163	55.4309	-0.239903	-2.90132	-2.66142	0	10.0866	9.39533		DOWN	DOWN
comp40004_c0_seq1	206	8.90622	0.774684	0.160153	3.52313	5.79729	2.27416	9.74225	17.1016	0	UP	UP
comp40256_c0_seq1	261	2.94626	12.287	742.372	-2.06018	-7.97711	-5.91693	1.61758	74.1707	54.7497		DOWN	DOWN
comp40340_c0_seq1	226	0.723696	0.392654	7.32281	0.882126	-3.33894	-4.22107	0	5.55868	7.93395			DOWN
comp40358_c0_seq1	231	0.754631	5.64605	313.361	-2.9034	-8.69784	-5.79444	1.04622	54.5805	37.7288		DOWN	DOWN
comp4036_c0_seq1	638	5.43485	3.88703	25.5516	0.483571	-2.2331	-2.71667	0	5.80527	9.49097			DOWN
comp40432_c0_seq1	309	0.39152	2.76148	156.129	-2.81829	-8.63944	-5.82115	0.101221	47.8157	36.7712		DOWN	DOWN
comp40441_c0_seq1	240	0.261971	1e-05	29.7588	14.6771	-6.82776	-21.5049	0	27.7971	29.6781		DOWN	DOWN
comp4050_c0_seq1	504	7.69478	0.550298	0.763633	3.8056	3.33293	-0.472667	9.62182	9.23033	0	UP	UP
comp40526_c0_seq1	242	1.40282	4.37802	17.4568	-1.64195	-3.63739	-1.99544	0	10.4402	3.37648		DOWN
comp40532_c0_seq1	228	0.579058	2.26204	20.5933	-1.96585	-5.15233	-3.18648	0	12.9083	6.16974		DOWN
comp4062_c0_seq1	282	5.75751	1e-05	1e-05	19.1351	19.1351	0	8.49614	10.2247	0	UP	UP
comp40779_c0_seq1	241	1.04701	5.00967	16.4486	-2.25845	-3.97362	-1.71518	0.0998908	9.70215	1.98646		DOWN
comp40883_c0_seq1	216	1.11088	2.60265	128.504	-1.22828	-6.85396	-5.62569	0	42.9503	36.897		DOWN	DOWN
comp4089_c0_seq1	892	3.86445	9.92025	250.39	-1.36011	-6.01777	-4.65766	0	48.6007	36.5399		DOWN	DOWN
comp40901_c0_seq1	209	1.24149	0.97966	15.1852	0.341718	-3.61253	-3.95424	0	13.3068	16.05		DOWN	DOWN
comp40951_c0_seq1	215	1.66405	7.8218	171.13	-2.2328	-6.68425	-4.45145	1.4015	46.1994	28.9816		DOWN	DOWN
comp4162_c0_seq1	257	13.6952	2.54385	1e-05	2.42859	20.3852	17.9567	4.25033	17.11	1.59665		UP
comp4174_c0_seq1	1236	15.1578	18.5207	614.073	-0.289074	-5.34027	-5.0512	0	24.9928	23.2733		DOWN	DOWN
comp4202_c0_seq1	525	12.7204	13.3024	98.5224	-0.0645385	-2.9533	-2.88876	0	15.8651	16.6003		DOWN	DOWN
comp4246_c0_seq1	297	23.5147	7.24126	1.5767	1.69925	3.89859	2.19934	1.54529	10.5035	1.22911		UP
comp4247_c0_seq1	1310	8.83263	0.572153	0.181843	3.94837	5.60208	1.65371	5.5944	9.09465	0		UP
comp4265_c0_seq1	266	18.8738	11.6328	2.63618	0.698192	2.83987	2.14167	0	8.423	2.35479		UP
comp4339_c0_seq1	757	13.9006	0.0411756	1e-05	8.39915	20.4067	12.0076	12.7211	14.4987	0	UP	UP
comp4369_c0_seq1	483	8.16136	3.80978	0.280459	1.0991	4.86295	3.76384	0.514097	11.0918	2.36113		UP
comp4392_c0_seq1	229	11.1398	0.0611099	0.0674779	7.5101	7.36709	-0.143008	20.3032	22.2065	0	UP	UP
comp4472_c0_seq1	591	4.23501	0.261013	16.9349	4.02017	-1.99956	-6.01974	2.26374	3.16129	14.9039			DOWN
comp4542_c0_seq1	553	9.90564	12.6794	56.4598	-0.356159	-2.5109	-2.15474	0	10.6684	7.87811		DOWN	DOWN
comp4546_c0_seq1	378	3.147	4.88378	34.4147	-0.634021	-3.45098	-2.81696	0	14.4755	10.3518		DOWN	DOWN
comp4564_c0_seq1	609	6.3408	0.751007	0.0985299	3.07777	6.00796	2.93019	2.95238	8.37606	0		UP
comp4586_c0_seq1	278	19.1743	10.0301	0.222337	0.934835	6.43028	5.49545	0.461353	23.6357	10.3744		UP	UP
comp4625_c0_seq1	644	10.1818	11.4164	5322.95	-0.165119	-9.03009	-8.86497	0	80.0829	79.1378		DOWN	DOWN
comp4672_c0_seq2	777	25.0633	0.471865	0.122372	5.73106	7.67816	1.9471	16.6318	21.4097	0	UP	UP
comp4688_c0_seq1	1392	8.9861	13.077	1.75567	-0.541263	2.35567	2.89694	0	5.51735	7.79182			UP
comp4700_c0_seq1	320	8.02463	11.6545	36.9748	-0.538376	-2.20403	-1.66566	0	8.63123	5.45586		DOWN
comp4770_c0_seq1	304	8.10293	26.1303	299.012	-1.68921	-5.20562	-3.51641	0	11.6616	5.27124		DOWN
comp4785_c0_seq1	1238	3.86791	3.76396	33.7572	0.0393041	-3.12557	-3.16487	0	15.2892	16.05		DOWN	DOWN
comp4824_c0_seq1	230	5.15453	4.23637	23.7968	0.283012	-2.20686	-2.48987	0	8.15715	11.7265		DOWN	DOWN
comp4833_c0_seq1	501	20.4452	2.75572	1.01636	2.89126	4.33028	1.43903	3.78349	9.72845	0		UP
comp4856_c0_seq1	696	11.8047	1e-05	0.214642	20.1709	5.78128	-14.3896	21.678	20.1807	0	UP	UP
comp4868_c0_seq1	1053	11.4442	6.50197	0.335318	0.815662	5.09294	4.27728	0.264557	17.4148	6.74409		UP
comp4869_c0_seq1	400	4.75058	3.88664	199.151	0.289582	-5.38962	-5.6792	0	39.7768	44.3343		DOWN	DOWN
comp4871_c0_seq1	479	4.75853	34.2677	161.512	-2.84826	-5.08498	-2.23672	7.30281	35.1387	8.75163		DOWN	DOWN
comp4872_c0_seq1	1020	6.47691	2.10632	0.399854	1.62058	4.01776	2.39718	1.23833	8.75517	0.390164		UP
comp4919_c0_seq1	2338	69.87	0.198555	0.32905	8.45899	7.73022	-0.728769	28.6342	30.8278	0	UP	UP
comp4925_c0_seq1	2520	54.2092	0.434364	0.036187	6.96349	10.5488	3.58536	29.2996	34.6436	0	UP	UP
comp498_c0_seq1	217	12.3759	1.84462	1.79581	2.74614	2.78483	0.0386898	6.4092	8.12998	0		UP
comp5001_c0_seq1	216	0.727698	0.450962	6.82374	0.690335	-3.22915	-3.91948	0	5.31401	7.68976			DOWN
comp5088_c0_seq1	1173	65.789	0.622981	30.5611	6.72252	1.10615	-5.61636	20.2022	0.929531	12.6978	UP		DOWN
comp5196_c0_seq1	1629	73.1928	1.04671	1.62893	6.12777	5.4897	-0.638066	21.3441	20.6626	0	UP	UP
comp5201_c0_seq1	221	1.6564	2.86185	41.5864	-0.788897	-4.64999	-3.86109	0	29.2587	24.7891		DOWN	DOWN
comp5202_c0_seq1	249	1.56195	0.487964	9.23685	1.6785	-2.56405	-4.24256	0	5.46193	10.5663			DOWN
comp5240_c0_seq1	861	87.2273	4.64152	0.859818	4.23211	6.6646	2.43249	17.0483	30.2071	0.978836	UP	UP
comp5248_c0_seq1	1038	90.2359	78.2106	7.05008	0.206337	3.67799	3.47165	0	24.3359	18.2748		UP	UP
comp5266_c0_seq1	1456	54.8592	57.1907	8.3392	-0.060048	2.71775	2.7778	0	10.259	7.9745		UP	UP
comp5269_c0_seq1	224	20.4751	85.9023	356.073	-2.06883	-4.12023	-2.05141	3.25685	23.7323	6.0616		DOWN
comp5305_c0_seq1	1337	47.337	3.79339	0.370473	3.64141	6.99746	3.35604	12.1786	26.7854	1.63713	UP	UP
comp5326_c0_seq1	639	7.64063	13.9281	62.1159	-0.866235	-3.0232	-2.15696	0	12.0487	6.43889		DOWN
comp5556_c0_seq1	205	0.897757	4.4607	47.9177	-2.31287	-5.73809	-3.42522	0.214676	27.9	14.6307		DOWN	DOWN
comp5704_c0_seq1	228	8.30249	1e-05	1e-05	19.6632	19.6632	0	6.02412	7.73482	0		UP
comp5707_c0_seq1	411	0.930786	2.46234	13.0444	-1.40351	-3.80884	-2.40533	0	10.7326	5.24372		DOWN
comp5719_c0_seq1	418	6.51085	1e-05	1e-05	19.3125	19.3125	0	6.45778	8.20084	0		UP
comp5831_c0_seq1	263	3.07922	4.92477	20.9695	-0.67749	-2.76765	-2.09016	0	8.72132	5.77606		DOWN
comp5963_c0_seq1	243	41.8875	9.28354	0.737085	2.17377	5.82854	3.65477	0.767947	9.68384	2.02421		UP
comp6066_c0_seq1	257	48.128	16.0735	1.93368	1.58219	4.63745	3.05526	0	7.92235	2.27893		UP
comp6103_c0_seq1	501	192.934	128.245	20.4852	0.589204	3.23545	2.64625	0	9.687	5.12202		UP
comp6166_c0_seq1	3000	278.898	168.711	22.713	0.725183	3.61815	2.89297	0.13113	27.1409	14.6086		UP	UP
comp6170_c0_seq1	472	8.3773	4.35599	25.3889	0.943484	-1.59964	-2.54313	0.107134	4.58943	12.4678			DOWN
comp6175_c0_seq1	2120	303.301	29.0917	0.100474	3.38207	11.5597	8.17764	19.1174	69.0549	24.1018	UP	UP	UP
comp6180_c0_seq1	911	282.079	158.628	31.9979	0.830449	3.14005	2.3096	0.0878687	15.9833	6.32208		UP
comp6292_c0_seq1	313	1.15955	0.774095	21.5394	0.582982	-4.21534	-4.79832	0	13.2131	15.5661		DOWN	DOWN
comp6382_c0_seq1	308	0.927814	0.65783	13.6998	0.49612	-3.88418	-4.3803	0	8.48416	8.91749		DOWN	DOWN
comp6432_c0_seq1	295	3.09004	5.67105	1087.55	-0.875989	-8.45924	-7.58325	0	53.5001	47.1596		DOWN	DOWN
comp6439_c0_seq1	2066	19.1218	0.0723555	0.551508	8.0459	5.1157	-2.93021	18.7292	17.5676	0	UP	UP
comp6449_c0_seq1	856	20.7896	9.5497	1.95562	1.12234	3.41016	2.28783	0.263732	11.229	2.64801		UP
comp6517_c0_seq1	2048	494.44	272.853	131.865	0.857671	1.90674	1.04906	0.515202	8.21614	1.01479		UP
comp6551_c0_seq1	240	106.612	19.4812	0.121249	2.45221	9.78017	7.32796	0	8.16261	3.3245		UP
comp6559_c0_seq1	973	361.953	0.464189	0.374018	9.60688	9.91848	0.311601	42.874	46.537	0	UP	UP
comp6597_c0_seq1	1425	122.722	36.8886	8.22691	1.73414	3.8989	2.16475	1.18335	12.448	2.64646		UP
comp6614_c0_seq1	1087	453.989	5.20462	27.1002	6.44672	4.06628	-2.38044	21.678	11.1933	2.64724	UP	UP
comp6623_c0_seq1	270	3.65926	15.3706	62.1947	-2.07055	-4.08717	-2.01661	0.975423	15.4703	4.08968		DOWN
comp6632_c0_seq1	1336	754.702	420.97	4.64902	0.842191	7.34284	6.50064	0.0912263	56.1285	42.9525		UP	UP
comp6679_c0_seq1	248	1.99382	2.07897	23.1537	-0.0603285	-3.53763	-3.4773	0	11.2386	11.2738		DOWN	DOWN
comp6721_c0_seq1	1160	221.501	430.348	861.984	-0.958194	-1.96035	-1.00216	0	7.74603	1.64911		DOWN
comp6724_c0_seq1	322	1.99442	3.32889	22.7461	-0.739067	-3.51157	-2.77251	0	10.0682	6.72972		DOWN
comp6758_c0_seq1	222	0.626914	2.65837	9.74003	-2.0842	-3.95759	-1.87338	0	10.6275	3.61546		DOWN
comp6795_c0_seq1	1490	172.225	16.0846	24.9364	3.42055	2.78798	-0.632571	9.40481	8.00118	0	UP	UP
comp6823_c0_seq1	455	103.539	41.7684	3.06359	1.30969	5.0788	3.76912	2.04058	34.2229	15.6539		UP	UP
comp6835_c0_seq1	1166	351.346	0.627056	0.643932	9.13008	9.09177	-0.0383136	31.4439	33.9152	0	UP	UP
comp6838_c0_seq1	270	2.8544	3.24688	50.1942	-0.185867	-4.13626	-3.95039	0	8.9341	8.45242		DOWN	DOWN
comp6930_c0_seq1	820	26.4291	12.039	1.60252	1.13441	4.04371	2.9093	0.295915	12.479	3.65916		UP
comp6964_c0_seq1	295	1.82793	0.599189	9.61361	1.60913	-2.39487	-4.004	0	3.1625	8.01204			DOWN
comp6969_c0_seq1	334	9.24807	2.61262	0.6396	1.82365	3.85391	2.03026	1.6798	9.18873	0.360826		UP
comp6976_c0_seq1	439	0.716095	0.692284	21.4406	0.0487867	-4.90405	-4.95284	0	21.6603	22.6521		DOWN	DOWN
comp6989_c0_seq1	283	3.3181	7.09533	29.3811	-1.09651	-3.14646	-2.04995	0	14.5707	7.68053		DOWN	DOWN
comp7008_c0_seq1	301	1.20578	2.20682	51.0703	-0.872007	-5.40445	-4.53244	0	30.0095	26.9677		DOWN	DOWN
comp7088_c0_seq1	980	62.9705	26.2939	0.61736	1.25995	6.67242	5.41247	1.2744	34.3328	17.9296		UP	UP
comp7123_c0_seq1	593	75.3715	5.97219	1.26615	3.65769	5.8955	2.23782	16.2529	29.9968	1.20849	UP	UP
comp7176_c0_seq1	230	2.93423	0.254105	64.4636	3.52948	-4.45743	-7.98692	0.691413	20.6028	33.0767		DOWN	DOWN
comp7315_c0_seq1	229	0.823665	1.11387	27.8737	-0.435453	-5.0807	-4.64525	0	22.5179	21.1985		DOWN	DOWN
comp7345_c0_seq1	1388	30.1451	1e-05	0.0419306	21.5235	9.4897	-12.0338	18.4441	20.3252	0	UP	UP
comp7364_c0_seq1	1091	19.9538	0.0985415	0.164999	7.66171	6.91806	-0.743656	16.8674	18.7487	0	UP	UP
comp7416_c0_seq1	266	34.1146	31.7538	3.49239	0.103462	3.2881	3.18464	0	15.0938	11.7592		UP	UP
comp7515_c0_seq1	715	71.8304	55.3559	230.162	0.375858	-1.67998	-2.05584	0	4.59462	8.19294			DOWN
comp7529_c0_seq1	3231	122.35	0.129597	0.177111	9.88277	9.43214	-0.450625	34.598	34.3535	0	UP	UP
comp7536_c0_seq1	627	3.96549	4.11143	26.6311	-0.0521439	-2.74754	-2.6954	0	7.60419	7.79182			DOWN
comp7546_c0_seq1	315	4.60855	8.20225	29.0233	-0.831705	-2.65483	-1.82312	0	11.6477	6.11701		DOWN
comp7615_c0_seq1	372	2.31043	10.2941	144.408	-2.15559	-5.96585	-3.81026	1.11104	40.5942	23.7454		DOWN	DOWN
comp7659_c0_seq1	380	40.7004	10.0331	1.48661	2.02027	4.77494	2.75468	1.12005	10.9715	2.08427		UP
comp7720_c0_seq1	615	20.3086	32.1332	349.185	-0.661971	-4.10383	-3.44185	0	12.821	8.80013		DOWN	DOWN
comp7756_c0_seq2	425	1.78431	13.2485	59.4728	-2.89239	-5.05879	-2.16641	3.0706	19.7225	4.14448		DOWN
comp7794_c0_seq1	338	1.87694	10.6136	24.2693	-2.49945	-3.69267	-1.19322	2.36361	13.602	1.38166		DOWN
comp7818_c0_seq1	411	24.7629	71.1383	12.0911	-1.52245	1.03423	2.55668	0.688633	1.43279	7.78607			UP
comp7862_c0_seq1	227	2.1351	6.95213	16.4336	-1.70315	-2.94427	-1.24112	0.259879	9.35393	1.73828		DOWN
comp7921_c0_seq1	1426	50.8748	19.2149	0.33533	1.40473	7.24523	5.8405	0.579803	21.9817	10.5002		UP	UP
comp7940_c0_seq1	228	1.79064	1.98864	29.4419	-0.151304	-4.03933	-3.88802	0	18.9828	17.9858		DOWN	DOWN
comp7985_c0_seq1	2165	70.0835	52.1176	3.15061	0.427303	4.47537	4.04807	0	20.7015	14.0503		UP	UP
comp8001_c0_seq1	424	26.7619	13.6726	4.38327	0.968892	2.6101	1.64121	0.479782	10.7326	2.00389		UP
comp8014_c0_seq1	1164	25.9327	14.6428	2.65068	0.824582	3.29034	2.46576	0	13.1776	4.51838		UP
comp8025_c0_seq1	203	1.22239	0.575829	17.6695	1.08599	-3.85348	-4.93947	0	10.1556	13.6644		DOWN	DOWN
comp8052_c0_seq1	394	3.1521	2.32635	19.1337	0.438242	-2.60173	-3.03997	0	6.71186	8.92458			DOWN
comp8141_c0_seq1	419	9.38834	2.67577	34.7014	1.81092	-1.88605	-3.69697	0.523262	1.86285	7.85819			DOWN
comp8159_c0_seq1	1927	72.0761	83.1759	2.30926	-0.206645	4.96402	5.17067	0	9.9659	9.12602		UP	UP
comp8186_c0_seq1	227	3.11111	5.96653	35.3791	-0.939462	-3.5074	-2.56793	0	11.3522	6.49623		DOWN
comp8241_c0_seq1	305	6.21575	14.8859	55.7647	-1.25994	-3.16535	-1.90541	0	13.7792	5.02752		DOWN
comp8245_c0_seq1	1008	31.9922	0.0231931	0.148205	10.4298	7.75398	-2.67583	18.1681	20.0634	0	UP	UP
comp8282_c0_seq1	456	1.85517	2.0915	12.1513	-0.172985	-2.71148	-2.53849	0	8.6677	7.6578		DOWN	DOWN
comp8300_c0_seq1	203	8.29117	11.3273	69.747	-0.450154	-3.07248	-2.62233	0	12.1577	9.30572		DOWN	DOWN
comp8324_c0_seq1	514	3.17737	8.23138	27.3333	-1.3733	-3.10475	-1.73145	0	14.84	5.73227		DOWN
comp8406_c0_seq1	530	45.9971	37.129	2.24492	0.308999	4.35681	4.04781	0	25.8778	18.3872		UP	UP
comp8418_c0_seq1	1956	49.6404	8.69296	9.928	2.5136	2.32194	-0.191656	9.05622	8.93107	0	UP	UP
comp8432_c0_seq1	218	14.7724	10.8224	2.51141	0.448883	2.55633	2.10745	0	10.7619	3.99591		UP
comp8433_c0_seq1	3480	81.8726	0.0376113	0.12625	11.088	9.34095	-1.74705	31.0375	33.3823	0	UP	UP
comp8461_c0_seq1	693	34.7869	1e-05	0.134194	21.7301	8.01808	-13.712	20.3533	22.2706	0	UP	UP
comp8467_c0_seq1	775	166.601	142.096	18.4374	0.22953	3.17569	2.94616	0	10.4679	6.65092		UP
comp8476_c0_seq1	2403	132.485	52.0961	22.8576	1.34658	2.53508	1.1885	2.84613	14.2573	1.39644		UP
comp8508_c0_seq1	723	100.582	95.248	15.3476	0.078609	2.71229	2.63368	0	10.3456	7.1951		UP
comp8519_c0_seq2	1405	37.4302	19.4302	0.292495	0.9459	6.99965	6.05375	0.054151	26.1853	14.7874		UP	UP
comp8562_c0_seq1	471	1.51478	3.23463	29.9142	-1.0945	-4.30365	-3.20916	0	22.0833	16.8062		DOWN	DOWN
comp8620_c0_seq1	851	46.7846	80.0823	436.812	-0.775449	-3.2229	-2.44746	0	19.4138	12.2243		DOWN	DOWN
comp8641_c0_seq1	1955	207.78	50.2834	1.72221	2.0469	6.91465	4.86775	8.48149	56.1642	24.0056	UP	UP	UP
comp8685_c0_seq1	2002	172.476	0.463748	0.372177	8.53884	8.85619	0.317354	37.9241	40.4646	0	UP	UP
comp8730_c0_seq1	399	39.6721	14.5021	1e-05	1.45186	21.9197	20.4678	1.14894	26.6892	12.3897		UP	UP
comp8790_c0_seq1	1329	6.60761	2.25633	1e-05	1.55015	19.3338	17.7836	1.94163	13.5788	1.43981		UP
comp8806_c0_seq1	828	114.533	80.193	15.2082	0.514216	2.91285	2.39863	0	17.18	8.67537		UP	UP
comp8871_c0_seq1	211	3.0454	12.3504	898.406	-2.01986	-8.20459	-6.18473	1.19943	78.0556	58.6257		DOWN	DOWN
comp8892_c0_seq1	1695	40.1023	6.67623	0.390242	2.58658	6.68317	4.09659	13.0692	38.1389	5.6716	UP	UP
comp8894_c0_seq1	245	2.64226	5.63091	23.1803	-1.0916	-3.13305	-2.04146	0	12.3875	6.72657		DOWN
comp8951_c0_seq2	1002	25.7774	4.00288	59.1753	2.687	-1.19889	-3.88589	6.4092	0.864033	15.4411			DOWN
comp8995_c0_seq2	417	99.1523	95.2103	1173.96	0.0585282	-3.56559	-3.62412	0	19.0559	20.4486		DOWN	DOWN
comp9014_c0_seq1	747	6.78488	1e-05	1e-05	19.372	19.372	0	9.96449	11.7323	0	UP	UP
comp9024_c0_seq1	1173	69.5933	0.0730763	0.333014	9.89533	7.70722	-2.18811	17.1247	16.6787	0	UP	UP
comp9033_c0_seq1	585	104.383	0.125047	1.1927	9.70521	6.45152	-3.25369	32.7418	28.4093	0.0144591	UP	UP
comp9050_c0_seq1	435	7.62033	1.75563	1e-05	2.11786	19.5395	17.4216	0.585823	8.53293	1.00003		UP
comp9069_c0_seq4	1287	12.4388	2.12878	0.767345	2.54675	4.01883	1.47208	2.8079	8.32625	0		UP
comp9073_c0_seq1	759	5.22451	1e-05	6.96488	18.9949	-0.414804	-19.4097	6.3476	0	9.17206			DOWN
comp9101_c0_seq1	214	17.5872	3.19627	0.154166	2.46007	6.8339	4.37383	4.96867	19.9353	2.42078		UP
comp9118_c0_seq2	2929	607.409	426.61	30.005	0.509753	4.33939	3.82964	0	35.1387	25.2806		UP	UP
comp9128_c0_seq1	384	11.8542	1e-05	1e-05	20.177	20.177	0	14.4524	16.2354	0	UP	UP
comp9135_c0_seq1	717	68.5681	10.094	0.688033	2.76404	6.63892	3.87488	7.20741	27.1409	5.01374		UP
comp9155_c0_seq1	775	9.08483	1e-05	0.114974	19.7931	6.30409	-13.489	14.1456	15.8934	0	UP	UP
comp9162_c0_seq1	910	7.59635	9.56733	30.9924	-0.33281	-2.02854	-1.69573	0	8.02297	6.21943		DOWN
comp9167_c0_seq1	1488	6.38664	7.7918	50.4668	-0.286898	-2.98221	-2.69531	0	12.0784	11.0257		DOWN	DOWN
comp9170_c0_seq1	1061	11.1653	15.8733	67.1798	-0.507591	-2.58901	-2.08142	0	10.3843	6.74409		DOWN
comp9198_c0_seq1	1232	5.72304	1e-05	3.0753	19.1264	0.896052	-18.2304	8.66187	0.5676	3.18101	UP
comp9200_c0_seq1	1605	105.829	59.1251	0.590341	0.839895	7.48597	6.64608	0	38.5541	26.918		UP	UP
comp9209_c0_seq1	536	12.5849	0.148051	0.560271	6.40945	4.48942	-1.92003	9.74698	7.46647	0	UP
comp9210_c0_seq1	615	13.0835	0.0961923	1e-05	7.08761	20.3193	13.2317	20.3998	22.3287	0	UP	UP
comp9211_c0_seq1	943	6.81298	0.151774	0.0655458	5.48829	6.69964	1.21135	8.61469	10.3533	0	UP	UP
comp9212_c0_seq1	609	22.4428	1e-05	1e-05	21.0978	21.0978	0	9.19463	10.9595	0	UP	UP
comp9219_c0_seq1	2545	39.9111	56.0454	606.038	-0.489805	-3.92455	-3.43474	0	30.7938	24.8346		DOWN	DOWN
comp9228_c0_seq1	859	7.15885	0.409893	0.192035	4.12641	5.22029	1.09388	6.06293	10.2741	0		UP
comp9240_c0_seq1	473	74.9932	6.42713	1e-05	3.54451	22.8383	19.2938	19.7194	47.4701	6.85015	UP	UP
comp9249_c0_seq1	279	11.2654	6.39508	1.44506	0.81686	2.96269	2.14583	0	8.15715	1.82854		UP
comp9264_c0_seq1	1259	40.2164	28.3586	2.79876	0.503995	3.84492	3.34093	0	15.3846	8.42867		UP	UP
comp9336_c0_seq2	1349	104.091	43.9081	14.8478	1.24528	2.80952	1.56424	2.16928	15.8606	2.66006		UP
comp9345_c0_seq1	784	15.2533	6.2735	0.176775	1.28178	6.43106	5.14928	1.57691	23.9344	7.82872		UP	UP
comp9366_c0_seq1	1035	130.088	271.743	596.777	-1.06276	-2.1977	-1.13495	0	7.76081	1.6612		DOWN
comp9371_c0_seq1	2110	17.0336	0.0428095	0.0733678	8.63623	7.85902	-0.777214	15.9744	17.8369	0	UP	UP
comp9424_c0_seq1	725	7.19756	0.193475	0.0426274	5.21729	7.39958	2.1823	5.93145	10.1165	0		UP
comp9432_c0_seq1	810	9.00735	0.247973	0.0763083	5.18285	6.88312	1.70027	4.11325	7.80416	0		UP
comp9438_c0_seq1	585	12.9026	4.30579	0.255369	1.58332	5.65894	4.07562	2.95935	18.8699	2.85972		UP
comp9452_c0_seq1	1046	45.4791	16.9753	4.67107	1.42177	3.28338	1.86162	2.27933	15.8651	2.53705		UP
comp9466_c0_seq1	1743	13.3937	11.0879	458.34	0.272568	-5.09679	-5.36936	0	45.7927	50.4412		DOWN	DOWN
comp9477_c0_seq1	255	19.4459	19.1148	0.242391	0.024776	6.32598	6.30121	0	18.7527	15.927		UP	UP
comp9504_c0_seq1	809	18.7865	1e-05	1e-05	20.8413	20.8413	0	13.6379	15.4029	0	UP	UP
comp9523_c0_seq1	217	36.125	4.6793	2.16486	2.94864	4.06065	1.11201	11.0382	19.5998	0.0264949	UP	UP
comp9543_c0_seq1	1067	33.4191	20.0774	8.43081	0.7351	1.98693	1.25183	0.166543	8.33596	1.31398		UP
comp9545_c0_seq1	1862	21.4827	12.2456	0.868162	0.810909	4.62907	3.81816	0	16.3811	7.31315		UP
comp9547_c0_seq1	500	20.8305	30.0693	159.138	-0.529595	-2.93351	-2.40391	0	10.0401	6.6148		DOWN
comp9550_c0_seq1	440	55.0911	7.82502	83.9746	2.81565	-0.608134	-3.42379	11.9227	0	16.705	UP		DOWN
comp9573_c0_seq1	905	26.4194	10.3086	2.44024	1.35774	3.4365	2.07876	0.869703	10.9966	1.78956		UP
comp9596_c0_seq2	1098	24.4305	15.1074	3.16418	0.693426	2.94878	2.25535	0	15.8606	5.90213		UP
comp9602_c0_seq1	1189	161.878	26.4215	1.01749	2.61513	7.31374	4.69862	6.84579	34.5782	11.169		UP	UP
comp9603_c0_seq1	759	9.23314	0.0308019	2.61631	8.22766	1.81929	-6.40837	8.60603	2.33787	1.75447	UP
comp9612_c0_seq1	399	18.4144	0.181556	0.503463	6.66427	5.1928	-1.47147	19.1174	15.6385	0	UP	UP
comp9634_c0_seq1	1519	151.788	544.47	39.7986	-1.8428	1.93126	3.77406	0.0875538	2.76852	7.73996			UP
comp9636_c0_seq2	1706	15.6516	22.7169	290.465	-0.537461	-4.21399	-3.67653	0	10.7326	7.75991		DOWN	DOWN
comp9643_c0_seq2	1165	14.3984	1e-05	1e-05	20.4575	20.4575	0	17.5482	19.4248	0	UP	UP
comp9666_c0_seq1	1939	24.3129	0.552295	1.5069	5.46014	4.01206	-1.44808	11.9227	8.53993	0	UP	UP
comp9669_c0_seq1	1503	21.177	2.45931	0.0411242	3.10617	9.0083	5.90212	2.43626	11.8015	1.31221		UP
comp9702_c0_seq1	1438	48.3058	2.0338	1.15505	4.56995	5.38617	0.816219	23.3158	30.7434	0	UP	UP
comp9719_c0_seq1	609	115.12	105.093	23.0645	0.131477	2.3194	2.18792	0	11.1229	7.27977		UP
comp9723_c0_seq1	662	17.5583	29.854	104.833	-0.765769	-2.57786	-1.81209	0	8.13343	3.65088		DOWN
comp9729_c0_seq2	327	6.99555	1.73277	0.177981	2.01336	5.29664	3.28329	3.54613	12.2428	0.101066		UP
comp9741_c0_seq1	716	294.427	0.20878	0.227314	10.4617	10.339	-0.122703	40.7163	41.0453	0	UP	UP
comp9742_c0_seq1	267	18.0823	0.489588	1e-05	5.20687	20.7861	15.5793	9.69039	13.9209	0	UP	UP
comp9744_c0_seq1	1377	29.7535	70.8951	284.282	-1.25262	-3.25619	-2.00357	0.0841235	15.7348	5.99246		DOWN
comp9745_c0_seq1	631	5.82475	1.21984	21.5408	2.25551	-1.8868	-4.14231	1.76502	2.96549	14.055			DOWN
comp9765_c0_seq3	1031	150.033	48.5329	7.17168	1.62825	4.38683	2.75858	2.548	23.7718	7.18585		UP
comp9789_c0_seq1	1567	7.52179	8.01901	396.663	-0.0923481	-5.72069	-5.62835	0	44.0505	43.9239		DOWN	DOWN
comp9795_c0_seq1	1792	9.09918	17.6803	56.5973	-0.95833	-2.63692	-1.67859	0	12.5727	5.18845		DOWN
comp9811_c0_seq1	1307	261.671	196.493	19.4733	0.413277	3.74819	3.33491	0	21.381	14.513		UP	UP
comp9821_c0_seq1	1337	31.8847	16.7934	2.09299	0.924971	3.92922	3.00425	0.324693	19.3541	7.63702		UP
comp9828_c0_seq2	1940	255.713	193.67	40.3767	0.400926	2.66293	2.262	0	11.678	6.12715		UP
comp9867_c0_seq1	939	25.3002	0.218816	0.355249	6.85329	6.15417	-0.699113	27.0487	25.8654	0	UP	UP
comp9876_c0_seq1	785	318.427	244.695	16.3515	0.379978	4.28347	3.90349	0	33.9181	25.4043		UP	UP
comp9893_c0_seq1	398	12.6454	8.36894	320.902	0.595493	-4.66545	-5.26094	0	13.9245	17.3719		DOWN	DOWN
comp9897_c0_seq1	1934	44.6564	1.45993	23.269	4.93489	0.940461	-3.99443	18.4377	1.00191	10.2483	UP		DOWN
comp9900_c0_seq1	490	6.57468	1.81682	0.156411	1.8555	5.39351	3.538	2.67029	13.4377	0.922667		UP
comp9902_c0_seq1	462	7.92621	1e-05	0.0668936	19.5963	6.88862	-12.7077	11.2055	12.9815	0	UP	UP
comp9937_c0_seq1	1025	17.2947	12.7917	2.57837	0.435127	2.7458	2.31068	0	9.35529	4.21964		UP
comp9944_c0_seq1	679	87.5105	6.18616	4.35128	3.82234	4.32994	0.507603	14.733	19.0921	0	UP	UP
comp9975_c0_seq2	1282	28.0828	4.19695	1.97336	2.74227	3.83096	1.08869	6.50992	12.9163	0		UP
comp9998_c0_seq1	3392	54.2372	6.48977	3.03501	3.06304	4.15951	1.09647	15.0625	24.6607	0.182701	UP	UP

## Sheet: Table S3
Table S3. The RPKM values of the 1428 DEGs identified from SW-1, SW-2 and TZ.
1428 Feature ID	RPKM
	SW-1					SW-2					TZ
	TreeA	TreeB	TreeC	Mean	Log10(Mean)	TreeA	TreeB	TreeC	Mean	Log10(Mean)	TreeA	TreeB	TreeC	Mean	Log10(Mean)
comp10007_c0_seq1	28.672	72.7731	49.1031	50.1827	1.70055	8.28239	72.2468	11.0758	30.535	1.4848	0.698854	4.49658	1.74076	2.31207	0.364
comp10033_c0_seq1	43.8867	14.3473	29.0989	29.1109	1.46406	14.004	1.95455	9.19089	8.38316	0.923408	2.95789	3.79354	2.06878	2.94007	0.468358
comp10034_c0_seq1	187.479	143.315	318.439	216.411	2.33528	12.1775	1.9524	7.01246	7.04744	0.848031	0	0	0	0	NA
comp10053_c0_seq2	222.636	239.488	407.706	289.944	2.46231	144.11	153.62	246.057	181.262	2.25831	3.11841	13.8049	15.1294	10.6842	1.02874
comp10144_c0_seq1	3.26557	4.21106	1.69553	3.05739	0.48535	6.41132	15.6713	7.094	9.72554	0.987914	73.8378	72.3063	94.8622	80.3354	1.90491
comp10146_c0_seq1	3.30312	7.53719	1.68968	4.17666	0.620829	1.10117	2.37162	4.3605	2.6111	0.416823	14.4447	22.0358	28.6883	21.7229	1.33692
comp10153_c0_seq1	5.83822	4.95301	5.82939	5.54021	0.743526	5.34369	1.55849	4.39817	3.76678	0.575971	39.0726	39.7005	24.7437	34.5056	1.53789
comp10165_c0_seq1	3.95492	1.80668	3.94894	3.23685	0.510122	7.12672	11.6133	10.8342	9.85807	0.993792	27.2162	34.8494	41.9046	34.6567	1.53979
comp10179_c0_seq1	5.66668	6.18104	2.62698	4.8249	0.683488	0	0.401329	2.34237	0.914567	-0.0387845	0	0	0	0	NA
comp10223_c0_seq1	32.5206	28.7721	2.22551	21.1727	1.32578	3.39739	1.84256	0.758305	1.99942	0.300903	122.44	90.3457	107.263	106.683	2.02809
comp10273_c0_seq1	43.4016	52.8486	7.14661	34.4656	1.53739	8.46727	10.8645	2.46692	7.26623	0.861309	124.61	104.717	173.338	134.222	2.12782
comp10357_c0_seq1	3.51153	1.91514	18.837	8.08789	0.907835	0	0	0	0	NA	0	0	0	0	NA
comp10397_c0_seq2	1.8891	3.94503	17.1109	7.64835	0.883568	9.02366	15.4169	13.067	12.5025	1.097	0.142858	1.00885	0.91502	0.688911	-0.161837
comp10508_c0_seq1	2.90823	0.352468	0.192601	1.1511	0.0611127	0.617938	1.02984	0.184945	0.610908	-0.214024	12.7636	38.2657	24.7437	25.2576	1.40239
comp10509_c0_seq2	2.88323	3.31403	3.44934	3.21554	0.507253	2.7667	4.61093	9.02583	5.46782	0.737814	14.5381	12.7419	34.7485	20.6762	1.31547
comp10540_c0_seq1	1.5474	3.86923	0.906123	2.10758	0.323785	1.51416	5.81407	2.39279	3.24034	0.510591	38.511	30.6076	26.6668	31.9285	1.50418
comp10575_c0_seq1	4.57007	6.2563	7.22254	6.01631	0.77933	1.15863	1.54476	5.27093	2.65811	0.424573	0.204217	0.865304	0	0.356507	-0.447932
comp10592_c0_seq1	4.26955	22.5381	17.0659	14.6245	1.16508	6.27978	12.8882	17.0633	12.0771	1.08196	44.3985	80.0978	142.388	88.9615	1.9492
comp10599_c0_seq1	2.08036	17.061	0	6.38045	0.804851	11.4487	7.63204	1.23478	6.77183	0.830706	185.566	143.274	205.154	177.998	2.25041
comp10669_c0_seq1	9.78685	9.24646	5.98063	8.33798	0.921061	25.1431	17.4228	6.53501	16.367	1.21397	1.968	2.05895	0	1.34232	0.127855
comp10686_c0_seq1	10.153	13.2074	38.4907	20.617	1.31423	5.53705	12.975	22.6987	13.7369	1.13789	0	3.34161	2.13103	1.82421	0.261076
comp10751_c0_seq1	4.18915	7.88255	3.58527	5.21899	0.717587	3.4349	3.67436	6.26391	4.45772	0.649113	26.5578	35.8445	40.6382	34.3468	1.53589
comp10810_c0_seq1	5.0247	2.62328	7.34647	4.99815	0.698809	2.15582	2.68266	2.23677	2.35842	0.37262	0	0	0	0	NA
comp10832_c0_seq1	2.92433	42.6411	3.81283	16.4594	1.21641	6.59224	8.8798	5.12577	6.86593	0.8367	0	0	0	0	NA
comp10846_c0_seq1	2.88283	0.349389	1.52735	1.58652	0.200446	2.75644	0	1.09998	1.28547	0.109062	966.216	905.78	1091.53	987.842	2.99469
comp10988_c0_seq1	2.44716	1.51716	2.61799	2.1941	0.341257	6.43963	10.7321	4.60886	7.26021	0.860949	27.4813	79.1969	24.398	43.692	1.6404
comp10989_c0_seq1	4.10367	13.546	8.85477	8.83482	0.946198	1.44267	2.81121	2.19212	2.14867	0.332169	0	0	0	0	NA
comp11027_c0_seq2	4.08351	8.82587	11.178	8.02913	0.904668	20.0285	38.0787	31.6816	29.9296	1.4761	40.9091	29.5198	47.0385	39.1558	1.5928
comp11083_c0_seq1	9.85965	16.1475	11.8443	12.6171	1.10096	1.84904	0.510053	5.72489	2.69466	0.430504	0.590002	0.952359	2.3394	1.29392	0.111908
comp11203_c0_seq1	3.0849	1.74477	0.817204	1.88229	0.274687	0.873968	0.582615	0	0.485528	-0.313786	35.0929	39.7063	18.4999	31.0997	1.49276
comp11224_c0_seq1	2.65072	11.5991	3.88051	6.04345	0.781285	3.8388	21.3025	6.33464	10.492	1.02086	36.2081	45.0703	37.0423	39.4402	1.59594
comp11274_c0_seq1	54.9641	63.5002	61.4862	59.9835	1.77803	64.4212	48.8081	47.5358	53.5883	1.72907	9.56579	14.7116	16.6267	13.6347	1.13465
comp11314_c0_seq1	3.18614	3.60406	12.2102	6.33347	0.801642	0	0	3.02577	1.00859	0.00371417	0.208817	0	0	0.0696056	-1.15736
comp11386_c0_seq1	3.47685	8.6647	9.26793	7.13649	0.853485	7.59537	29.3026	25.3443	20.7474	1.31696	36.9577	98.3628	38.9969	58.1058	1.76422
comp11396_c0_seq1	5.14416	9.81943	4.23956	6.40105	0.806251	0.212533	0.141681	0.254439	0.202885	-0.692751	0.280953	0	0	0.0936511	-1.02849
comp11425_c0_seq1	2.94718	2.56789	2.43712	2.65073	0.423366	3.7319	5.29151	5.6024	4.87527	0.687998	16.5226	25.8065	17.5546	19.9612	1.30019
comp11454_c0_seq1	2.64761	2.94326	3.68217	3.09101	0.490101	3.93793	4.79769	6.5839	5.10651	0.708124	14.899	13.3527	18.7793	15.677	1.19526
comp11461_c0_seq1	3.16475	2.14792	3.3744	2.89569	0.461752	3.64801	5.64824	3.80378	4.36668	0.640151	14.4672	31.0529	26.7365	24.0855	1.38176
comp11490_c0_seq1	3.42944	2.02046	2.11978	2.52323	0.401956	0	0	0.169626	0.0565421	-1.24763	6.93018	6.43724	11.2971	8.22151	0.914952
comp11501_c0_seq2	3.52636	0.626167	11.6334	5.26199	0.72115	8.23335	1.13838	51.8393	20.4037	1.30971	0	0.151825	0	0.0506084	-1.29578
comp11514_c0_seq2	1.62603	0.752447	2.32993	1.56947	0.195753	5.93627	0.732835	8.15961	4.94291	0.693982	12.6429	15.1885	28.2342	18.6885	1.27157
comp11587_c0_seq1	4.77712	1.8303	0	2.20247	0.342911	0	0	0	0	NA	28.9354	3.13822	5.49859	12.5241	1.09775
comp11668_c0_seq2	6.42526	12.9347	9.28933	9.54975	0.979992	9.7996	16.0888	10.6653	12.1846	1.08581	42.396	37.1981	67.5451	49.0464	1.69061
comp11731_c0_seq1	2.93669	2.84734	0	1.92801	0.285109	3.49432	0.166387	0	1.22024	0.0864435	48.9969	30.9898	25.9765	35.321	1.54803
comp11750_c0_seq1	3.67781	6.01748	3.16638	4.28723	0.632176	5.86094	22.5309	9.35543	12.5824	1.09976	18.7237	31.9774	25.0883	25.2631	1.40249
comp11795_c0_seq2	1.44141	2.44573	0.381838	1.42299	0.153203	4.74719	2.24587	3.29994	3.431	0.535421	198.385	120.847	212.644	177.292	2.24869
comp11882_c0_seq1	3.17388	2.30799	1.26117	2.24768	0.351734	9.44138	11.0144	21.5968	14.0175	1.14667	1.11436	3.14782	0.47584	1.57934	0.198475
comp11940_c0_seq1	2.72966	2.54736	4.30245	3.19315	0.50422	3.14648	5.48067	6.3794	5.00218	0.699159	18.5832	11.5599	18.9785	16.3739	1.21415
comp11942_c0_seq1	9.75951	19.8386	0.716728	10.1049	1.00453	0	0	0	0	NA	0.189989	0	0	0.0633296	-1.19839
comp11973_c0_seq1	21.4723	40.7195	47.5265	36.5727	1.56316	31.7804	60.009	57.8197	49.8697	1.69784	220.818	216.787	332.825	256.81	2.40961
comp11987_c0_seq1	3.57442	5.13185	9.4324	6.04622	0.781484	1.63582	1.77205	2.69276	2.03354	0.308253	0.270305	0	0	0.0901016	-1.04527
comp11991_c0_seq1	5.15519	3.60174	4.21741	4.32478	0.635964	9.69725	1.95438	2.29486	4.64883	0.667344	36.6685	31.5794	27.8466	32.0315	1.50558
comp11995_c0_seq1	3.9013	3.23782	7.15568	4.76494	0.678057	4.16275	5.29776	20.8402	10.1002	1.00433	0.0833764	0.628054	0.801054	0.504162	-0.29743
comp12033_c0_seq1	3.54127	13.5459	3.22575	6.77096	0.83065	0	0	0	0	NA	0	0	0	0	NA
comp12107_c0_seq2	5.69601	3.45169	5.0171	4.7216	0.674089	40.5445	3.83236	11.6638	18.6802	1.27138	87.4349	30.9202	45.5164	54.6238	1.73738
comp12114_c0_seq1	1.44889	0.782223	0.244248	0.825121	-0.0834824	2.93866	7.31361	8.79522	6.34916	0.802716	33.5378	60.5976	37.4611	43.8655	1.64212
comp12171_c0_seq1	5.77264	2.5372	6.06154	4.79046	0.680377	20.896	15.7918	19.9386	18.8755	1.2759	22.0163	41.1389	45.9838	36.3797	1.56086
comp12181_c0_seq1	6.39247	12.8185	26.7095	15.3068	1.18489	3.45741	12.1826	17.2217	10.9539	1.03957	0	1.53696	0.522754	0.686572	-0.163314
comp12296_c0_seq1	6.3688	4.47533	4.17521	5.00645	0.69953	1.86583	1.40328	3.09285	2.12065	0.326469	0	0	0	0	NA
comp12347_c0_seq1	5.58413	0.657979	4.31452	3.51887	0.546404	0.576776	0	1.1048	0.560526	-0.251404	788.379	897.548	1073.26	919.728	2.96366
comp12414_c0_seq1	4.72423	2.52351	11.0315	6.09308	0.784837	0	0	0	0	NA	0.0860061	0.0809829	0.0918133	0.0862674	-1.06415
comp12433_c0_seq1	4.97946	3.5119	16.1866	8.22598	0.915187	5.0862	4.93722	14.4215	8.1483	0.911067	0	0.333204	0.755532	0.362912	-0.440198
comp12437_c0_seq1	5.05028	15.8865	3.84066	8.25915	0.916935	14.3901	27.1752	15.1056	18.8903	1.27624	83.9006	185.997	263.575	177.824	2.24999
comp12478_c0_seq1	7.16569	20.5909	0.428632	9.39506	0.972899	2.23472	4.35462	0	2.19645	0.341721	98.6229	36.3748	12.3718	49.1232	1.69129
comp12488_c0_seq1	6.52773	10.5725	3.97843	7.02622	0.846722	0.203686	0.0905224	0.406413	0.233541	-0.631637	0.179506	0.0845107	0.0958129	0.119943	-0.921025
comp12528_c0_seq1	5.10792	4.01636	16.5179	8.54739	0.931834	1.06547	2.84111	2.49566	2.13408	0.329211	0.122476	0.403631	0.130746	0.218951	-0.659653
comp12531_c0_seq2	6.71243	6.02686	7.15708	6.63213	0.821653	5.44947	6.65549	5.87656	5.99384	0.777705	22.4363	19.5207	31.113	24.3567	1.38662
comp12541_c0_seq2	7.39362	2.36964	14.6243	8.12917	0.910046	5.49846	4.23563	8.33799	6.02403	0.779887	0	0	0	0	NA
comp12547_c0_seq2	1.86584	3.02197	1.80858	2.23213	0.348719	1.5768	3.19547	0.906097	1.89279	0.277102	32.4334	39.0179	103.781	58.4108	1.76649
comp12661_c0_seq2	71.8562	85.5098	31.8936	63.0865	1.79994	10.672	5.85731	9.58802	8.70579	0.939808	7.73478	13.695	13.6886	11.7061	1.06841
comp12737_c0_seq1	4.83449	4.70091	11.3783	6.97125	0.843311	7.96497	14.8229	8.31042	10.3661	1.01562	31.3314	68.9515	55.2245	51.8358	1.71463
comp12807_c0_seq1	5.47997	5.9692	5.58267	5.67728	0.75414	0	0	0.240933	0.0803109	-1.09523	0	0	0	0	NA
comp12818_c0_seq2	5.80177	4.92209	10.7584	7.16077	0.854959	0	1.71353	9.34166	3.68506	0.566445	0	0	0	0	NA
comp12851_c0_seq1	1.82928	2.01175	2.32422	2.05508	0.31283	2.31771	5.23977	13.6926	7.08335	0.850239	7.39319	18.5637	27.2323	17.7297	1.2487
comp12928_c0_seq1	2.05021	0.811698	0.506904	1.12294	0.0503555	1.01646	7.04711	3.1639	3.74249	0.573161	46.626	54.2775	52.4996	51.1344	1.70871
comp12944_c0_seq1	7.23772	4.09354	28.0624	13.1312	1.11831	0.489321	0	0	0.163107	-0.787528	1.29369	2.03022	2.53191	1.95194	0.290467
comp12959_c0_seq2	122.568	163.929	129.06	138.519	2.14151	75.0279	167.184	98.3321	113.515	2.05505	3.9721	20.3425	10.9627	11.7591	1.07037
comp13035_c0_seq1	6.61049	15.9833	23.1882	15.2607	1.18357	12.6179	14.6382	12.5555	13.2705	1.12289	1.73298	2.75361	2.65937	2.38199	0.376939
comp13191_c0_seq1	5.98233	5.37382	5.46505	5.60707	0.748736	28.2637	21.3712	32.8184	27.4844	1.43909	18.5948	31.5972	42.3782	30.8567	1.48935
comp13238_c0_seq1	2.77381	3.19368	1.83699	2.6015	0.415223	3.24158	7.07216	0.705588	3.67311	0.565034	53.5641	77.7626	68.2011	66.5093	1.82288
comp13242_c0_seq1	1.99886	3.77697	39.5927	15.1228	1.17963	0	0.810778	1.53693	0.78257	-0.106477	0.0893204	0.588725	0	0.226015	-0.645862
comp13248_c0_seq1	5.39203	8.97633	4.90499	6.42445	0.807836	4.38823	9.07861	2.71731	5.39472	0.731969	53.9085	46.8046	34.8066	45.1732	1.65488
comp13268_c0_seq1	5.21624	6.97434	8.12504	6.77187	0.830709	11.2342	11.1715	18.5763	13.6607	1.13547	27.8964	50.6028	52.9909	43.83	1.64177
comp13372_c0_seq1	3.68809	3.27788	3.41948	3.46182	0.539304	3.26517	2.612	5.0035	3.62689	0.559535	33.1494	23.2474	44.2345	33.5437	1.52561
comp13443_c0_seq1	5.33828	3.58536	0	2.97455	0.473421	5.45869	11.0271	4.75274	7.07951	0.850003	31.7066	57.2388	34.3143	41.0866	1.6137
comp13557_c1_seq1	22.3026	21.4201	34.9304	26.2177	1.41859	11.4316	7.7802	11.5039	10.2386	1.01024	4.76957	5.06383	4.83184	4.88841	0.689168
comp13570_c0_seq1	3.46727	5.8831	0	3.11679	0.493708	1.03141	0.916762	0	0.649391	-0.187494	8.63518	18.4014	11.8867	12.9744	1.11309
comp13578_c0_seq1	219.713	316.896	19.0919	185.234	2.26772	42.2653	83.7095	4.21658	43.3972	1.63746	3.0365	8.00563	0.432204	3.82478	0.582607
comp13585_c0_seq1	3.34544	18.3807	6.35128	9.35915	0.971236	1.89557	1.89547	1.70199	1.83101	0.26269	0	0.294931	1.00312	0.432684	-0.363829
comp13646_c0_seq1	4.37275	11.5303	90.3994	35.4341	1.54942	9.57997	19.4519	48.2957	25.7758	1.41121	0.232367	2.18796	5.08517	2.50183	0.398258
comp13654_c0_seq2	4.2586	8.94851	3.92229	5.7098	0.756621	12.1857	23.8808	10.0939	15.3868	1.18715	41.0894	80.6163	75.2669	65.6576	1.81728
comp13768_c0_seq1	4.60857	6.19313	11.2463	7.34933	0.866248	4.46918	30.7434	14.3443	16.519	1.21798	30.8807	78.5969	69.4138	59.6305	1.77547
comp13808_c0_seq1	30.6053	15.1942	0.420389	15.4066	1.18771	3.54052	2.47261	0.403678	2.13894	0.330198	34.0994	22.2446	34.0226	30.1222	1.47889
comp13856_c0_seq1	4.92128	37.9175	1.86662	14.9018	1.17324	30.7427	96.6592	79.703	69.035	1.83907	93.5942	176.338	332.889	200.941	2.30307
comp13909_c0_seq8	63.1878	24.6264	13.019	33.6111	1.52648	17.3616	13.1057	10.5147	13.6607	1.13547	6.54774	4.79877	6.77366	6.04006	0.781041
comp13922_c0_seq1	24.4758	20.6205	25.5524	23.5496	1.37198	11.6472	14.6139	19.6509	15.304	1.18481	1.69483	4.98983	3.00696	3.23054	0.509275
comp13927_c0_seq1	35.1293	122.112	47.8443	68.3617	1.83481	3.52211	7.71761	6.04988	5.7632	0.760664	0.647788	0.533709	0.734747	0.638748	-0.194671
comp13956_c0_seq2	22.2306	24.1824	1.26451	15.8925	1.20119	0.0507129	0	0	0.0169043	-1.772	0	0	0	0	NA
comp13961_c0_seq1	488.975	708.351	23.6027	406.976	2.60957	0	0.169402	0.304221	0.157874	-0.801689	0	0.316303	0	0.105434	-0.977018
comp14030_c0_seq1	59.5748	69.705	143.91	91.0634	1.95934	97.2109	126.495	172.821	132.176	2.12115	14.9269	27.5417	13.1059	18.5248	1.26775
comp14032_c0_seq1	13.0082	8.47399	22.011	14.4977	1.1613	21.2826	15.2011	48.8486	28.4441	1.45399	3.42542	3.95643	5.99699	4.45961	0.649297
comp14050_c0_seq1	23.0234	35.9315	44.0629	34.3392	1.53579	0.228903	5.31028	1.53461	2.35793	0.372531	0.121037	2.45031	4.58695	2.3861	0.377689
comp14070_c0_seq1	2.2965	2.07819	2.27119	2.21529	0.345431	2.96028	3.33963	3.13506	3.14499	0.497619	16.5562	5.52708	30.5279	17.5371	1.24396
comp14078_c0_seq2	47.1901	21.5113	49.4671	39.3895	1.59538	27.5515	9.21828	35.6804	24.1501	1.38292	2.6658	1.56474	2.73492	2.32182	0.365829
comp14122_c0_seq1	48.9032	46.9416	45.9613	47.2687	1.67457	51.8562	44.9703	45.462	47.4295	1.67605	538.695	408.461	390.178	445.778	2.64912
comp14127_c0_seq1	41.0067	39.2014	32.8934	37.7005	1.57635	12.4226	25.8791	27.7301	22.0106	1.34263	3.45922	11.4717	7.40586	7.44559	0.871899
comp14151_c0_seq1	111.558	247.42	84.6959	147.891	2.16994	15.8269	56.1994	5.8829	25.9697	1.41447	0.590539	9.73084	0.0900589	3.47048	0.540389
comp14154_c0_seq2	28.8276	41.6158	96.458	55.6338	1.74534	7.54956	12.8316	13.7297	11.3703	1.05577	0.53328	0.824934	0.325307	0.561174	-0.250903
comp14157_c0_seq2	0.947836	0.502577	2.52656	1.32566	0.122431	1.93843	1.76212	2.00419	1.90158	0.279114	15.7242	16.0122	23.2516	18.3293	1.26315
comp14180_c0_seq2	47.2877	46.9356	19.3971	37.8734	1.57833	0.889047	0.395111	0.236521	0.506893	-0.295083	0.522336	0.491828	0.139401	0.384522	-0.415079
comp14193_c0_seq1	80.0774	75.3037	134.1	96.4939	1.9845	40.839	34.5423	79.2905	51.5572	1.71229	1.16867	0.794744	1.03965	1.00102	0.000443527
comp14195_c0_seq1	2.41133	1.93206	0.745235	1.69621	0.229479	14.7445	10.6261	19.4408	14.9371	1.17427	7.90181	16.6167	14.4807	12.9997	1.11393
comp14207_c0_seq1	19.5954	76.0191	86.3075	60.6407	1.78276	2.75475	38.1605	12.0704	17.6619	1.24704	0	1.2344	0.544244	0.592882	-0.227032
comp14268_c0_seq1	19.207	37.273	0.853082	19.111	1.28128	0	0	0	0	NA	0	0	0.120701	0.0402336	-1.39541
comp14275_c0_seq1	18.791	24.1558	10.4939	17.8136	1.25075	0.36508	0	0.0971255	0.154069	-0.812286	0.0536232	0.0504913	0.0572439	0.0537862	-1.26933
comp14312_c0_seq1	2.88971	2.00583	1.33962	2.07839	0.317726	2.44206	0.911654	1.40332	1.58568	0.200215	20.7898	13.0098	22.7449	18.8482	1.27527
comp14346_c0_seq1	399.933	370.061	218.875	329.623	2.51802	139.178	92.8288	180.1	137.369	2.13789	62.7849	91.2649	80.6829	78.2442	1.89345
comp14390_c0_seq1	46.471	48.6802	54.3788	49.8433	1.69761	15.3301	18.1143	25.2533	19.5659	1.2915	0.448206	1.32637	0.444293	0.739624	-0.130989
comp14394_c0_seq1	50.6955	43.6916	27.9035	40.7635	1.61027	47.7547	34.7869	9.88667	30.8094	1.48868	5.37935	5.51209	1.85789	4.24977	0.628366
comp14488_c0_seq1	17.8351	22.7782	11.1672	17.2602	1.23704	1.33497	0.421042	0.618653	0.791554	-0.101519	11.9167	3.94867	5.32754	7.06429	0.849068
comp14512_c0_seq1	71.04	101.383	149.919	107.447	2.0312	43.0484	100.641	83.5199	75.7365	1.8793	1.17217	10.7878	5.08598	5.68199	0.754501
comp14517_c0_seq1	86.1555	41.4615	6.06814	44.5617	1.64896	0	0.106382	0	0.0354606	-1.45025	0	0	0	0	NA
comp14519_c0_seq1	32.339	34.9646	14.2248	27.1762	1.43419	0.335579	0.447415	0	0.260998	-0.583363	1.55264	0.139234	0.315709	0.669193	-0.174449
comp14580_c0_seq1	24.0779	20.2384	23.51	22.6088	1.35428	19.7051	31.2618	25.2489	25.4053	1.40492	70.6566	101.455	158.587	110.233	2.04231
comp14630_c0_seq1	3.41057	10.3158	5.49943	6.40859	0.806763	5.84466	10.1449	5.94092	7.31017	0.863927	168.956	103.634	208.687	160.426	2.20527
comp14631_c0_seq2	17.2766	27.7622	29.9636	25.0008	1.39795	6.34851	29.8264	7.0574	14.4108	1.15869	0.399632	2.82218	5.546	2.9226	0.46577
comp14718_c0_seq1	28.8727	16.5642	23.1493	22.8621	1.35912	2.464	1.05594	0.526757	1.3489	0.12998	69.5069	100.17	101.831	90.5026	1.95666
comp14764_c0_seq1	2.28385	2.16552	1.2456	1.89832	0.27837	2.59763	5.19498	1.79412	3.19558	0.504549	11.0941	26.8614	33.6965	23.884	1.37811
comp14765_c0_seq2	94.2534	106.935	33.599	78.2624	1.89355	7.40696	2.17594	4.65916	4.74735	0.676452	2.76595	2.23979	1.18108	2.06227	0.314346
comp14811_c0_seq1	31.3876	136.092	58.3393	75.273	1.87664	62.7072	104.142	141.904	102.918	2.01249	1.54043	6.25511	17.2152	8.33692	0.921006
comp14896_c0_seq3	48.4647	42.1068	20.593	37.0548	1.56884	13.7223	22.6433	21.4983	19.288	1.28529	4.28301	10.807	8.9651	8.01837	0.904086
comp14911_c0_seq1	4.63514	10.4863	9.34001	8.15381	0.91136	1.70054	6.61799	0.93539	3.08464	0.489204	0.121513	0.686497	0	0.269337	-0.569704
comp14912_c0_seq2	10.0543	37.6167	20.2289	22.6333	1.35475	3.66382	11.7635	4.02817	6.48516	0.81192	0.296529	2.7921	0.422067	1.17023	0.0682714
comp14919_c0_seq1	6.26775	7.69329	22.9483	12.3031	1.09001	3.78845	0.476011	11.6354	5.29996	0.724273	0.760386	1.16037	1.45551	1.12542	0.0513158
comp14928_c0_seq1	13.2438	18.6786	20.1005	17.341	1.23907	5.33234	1.84008	5.1821	4.11817	0.614705	0.414645	0	0	0.138215	-0.859445
comp1493_c0_seq1	2.768	8.63842	6.78263	6.06301	0.782689	0.588142	4.01876	2.46438	2.35709	0.372377	0	0	0	0	NA
comp1495_c0_seq1	9.35138	46.4194	12.3598	22.7102	1.35622	1.3317	12.4285	3.36569	5.70863	0.756532	1.5648	3.68352	1.25284	2.16706	0.33587
comp1504_c0_seq1	3.26267	4.51755	1.28422	3.02148	0.480219	21.4482	13.3367	1.58942	12.1248	1.08367	52.9538	25.016	26.2619	34.7439	1.54088
comp15062_c0_seq1	11.4796	3.7458	0	5.07515	0.705449	0.262681	0	0	0.0875605	-1.05769	28.995	18.31	32.0648	26.4566	1.42253
comp15101_c0_seq1	6.87555	15.8465	5.31233	9.34479	0.97057	0.852199	0.227241	0	0.359813	-0.443923	1.12654	0	0.120261	0.415602	-0.381323
comp15113_c0_seq1	10.7615	4.02541	16.9167	10.5679	1.02399	2.69194	0.630511	6.96805	3.43017	0.535315	0.384708	0.13584	0.410683	0.31041	-0.508064
comp15121_c0_seq1	6.42204	7.81052	3.91402	6.04886	0.781674	1.33592	0	0.639734	0.658552	-0.18141	0.0882996	0	0.659831	0.249377	-0.603144
comp15160_c0_seq1	9.90102	15.0602	3.24542	9.40223	0.973231	0	0	0	0	NA	0	0	0	0	NA
comp15161_c0_seq1	233.718	303.805	508.113	348.545	2.54226	269.424	293.915	641.563	401.634	2.60383	24.023	53.616	48.6241	42.0877	1.62416
comp1518_c0_seq1	14.5348	54.2187	27.7753	32.1763	1.50754	26.0741	35.2036	30.425	30.5676	1.48526	2.83598	7.29208	0.232882	3.45365	0.538278
comp15223_c0_seq1	6.99015	9.8676	18.0088	11.6222	1.06529	9.28897	10.5667	13.365	11.0736	1.04429	0.39429	1.21986	0.841826	0.818659	-0.086897
comp15228_c0_seq1	15.2728	10.0958	13.5704	12.9797	1.11326	17.7943	20.3172	15.6372	17.9162	1.25325	55.8665	53.1337	74.9323	61.3108	1.78754
comp15249_c0_seq1	5.35554	4.65433	19.8619	9.95726	0.99814	3.98279	2.33127	14.188	6.83402	0.834676	0	0.483654	0.137084	0.206913	-0.684213
comp1526_c0_seq1	17.4072	40.0051	8.74409	22.0521	1.34345	4.25293	5.02366	3.70697	4.32785	0.636272	0.443846	1.34664	0.579107	0.789865	-0.102447
comp15268_c0_seq1	5.5681	4.72385	5.7541	5.34868	0.728247	10.7835	9.71903	8.10732	9.53662	0.979395	27.1986	29.9052	38.1047	31.7361	1.50155
comp15330_c0_seq1	15.1921	11.2148	9.69533	12.0341	1.08041	20.9821	53.2105	46.374	40.1889	1.60411	87.2836	209.3	134.589	143.724	2.15753
comp15354_c0_seq1	5.36492	19.2839	7.59217	10.747	1.03129	0.629964	6.48595	4.27367	3.79653	0.579387	0.185059	1.91676	1.58043	1.22742	0.088992
comp15357_c0_seq1	6.28731	10.7382	5.06237	7.36263	0.867033	24.24	68.1636	19.4445	37.2827	1.57151	36.7605	76.2722	53.1338	55.3888	1.74342
comp15371_c0_seq1	6.89364	9.53438	3.49119	6.63974	0.822151	0.0215405	0.0574384	0.412605	0.163861	-0.785524	4.58447	3.21743	8.42015	5.40735	0.732984
comp15384_c0_seq1	4.49094	26.5642	0.9253	10.6602	1.02776	25.8835	53.9289	19.6585	33.157	1.52057	61.4418	127.601	146.106	111.716	2.04812
comp15424_c0_seq1	6.51106	6.0933	4.04531	5.54989	0.744284	0.149756	1.13143	0	0.427063	-0.369508	0.329945	0.807754	0.105667	0.414455	-0.382522
comp15435_c0_seq1	21.2554	14.2442	65.7463	33.7486	1.52826	14.0803	18.4186	56.6128	29.7039	1.47281	1.22917	2.64544	9.18515	4.35325	0.638814
comp15466_c0_seq1	4.16793	2.84265	1.74276	2.91778	0.465052	5.22677	5.26701	10.6957	7.06317	0.848999	8.19488	21.4088	29.6753	19.7596	1.29578
comp15531_c0_seq1	7.28598	16.5163	4.26936	9.35722	0.971147	1.47381	2.05166	0.726521	1.41733	0.151471	0	0	0	0	NA
comp15547_c0_seq1	6.65081	9.14983	19.1659	11.6555	1.06653	61.848	55.7256	91.38	69.6512	1.84293	247.16	264.006	324.718	278.628	2.44502
comp15550_c0_seq1	4.12997	4.2134	10.7847	6.37602	0.80455	2.17717	5.93507	6.16705	4.75976	0.677585	0.154182	0.822668	0.54864	0.508496	-0.293712
comp15571_c0_seq1	8.63082	15.3308	4.16782	9.37649	0.97204	0.200579	0.0891417	0	0.0965737	-1.01514	0	0	0	0	NA
comp15578_c0_seq1	9.49296	26.9221	20.0101	18.8084	1.27435	3.51544	3.34238	2.41477	3.09086	0.49008	0.152366	1.43467	0.325307	0.637447	-0.195556
comp15618_c0_seq1	4.44175	6.1125	8.28438	6.27954	0.797928	0.729783	1.07541	1.56342	1.12287	0.0503306	0.203099	0.167332	0.054203	0.141545	-0.849107
comp15638_c0_seq1	9.84552	5.86155	15.3742	10.3604	1.01538	12.5885	17.9826	22.9135	17.8282	1.25111	0.679228	2.71812	1.994	1.79711	0.254576
comp15648_c0_seq1	9.51329	11.8347	4.79186	8.71328	0.940182	0.340136	0.544188	0.162881	0.349068	-0.45709	7.8686	4.6571	10.1759	7.56719	0.878935
comp15698_c0_seq1	7.39616	42.4796	21.5705	23.8154	1.37686	29.0512	153.175	60.346	80.8575	1.90772	179.865	456.298	636.813	424.325	2.6277
comp15710_c0_seq1	7.05991	13.6741	0	6.91132	0.839561	51.7104	32.8869	0.830163	28.4758	1.45448	313.763	282.49	164.678	253.644	2.40422
comp15755_c0_seq1	4.2868	5.45524	6.03285	5.2583	0.720845	4.782	11.0815	6.47458	7.44603	0.871925	20.7705	46.9093	38.5616	35.4138	1.54917
comp15795_c0_seq3	78.3137	77.183	40.9396	65.4788	1.8161	36.8647	36.5943	16.2441	29.9011	1.47569	3.11233	2.77631	1.0492	2.31261	0.364103
comp15807_c0_seq1	6.4872	4.94861	14.0006	8.47882	0.928335	1.86489	1.08104	2.96062	1.96885	0.294212	0.375146	0.403697	0.457687	0.412177	-0.384917
comp15816_c0_seq1	11.3388	23.2091	7.00862	13.8521	1.14152	0.267694	0	0	0.0892315	-1.04948	0	0	0	0	NA
comp15841_c0_seq1	473.453	626.469	863.492	654.471	2.81589	551.172	383.481	842.631	592.428	2.77264	39.4917	51.9844	25.0768	38.8509	1.5894
comp15913_c0_seq1	16.6709	3.90622	15.1623	11.9131	1.07603	12.8701	1.73166	4.52337	6.37503	0.804482	1.01455	0.146969	0.666496	0.60934	-0.215141
comp15919_c0_seq1	3.75931	1.87199	17.8822	7.83783	0.894196	0.729317	0.324124	2.47384	1.17576	0.0703187	0	0	0.5146	0.171533	-0.765652
comp15949_c0_seq1	4.93481	7.05972	9.53955	7.17803	0.856005	0.143918	0	0.574316	0.239411	-0.620855	16.4248	12.3008	29.6856	19.4704	1.28937
comp15957_c0_seq1	10.0329	4.75238	0.775185	5.18684	0.714903	45.4516	50.8998	3.20079	33.1841	1.52093	93.9475	52.55	102.397	82.9647	1.91889
comp15958_c0_seq2	6.61966	13.3119	7.12257	9.01805	0.955113	0.121553	0.162062	0.29104	0.191552	-0.717714	0	0.302598	0	0.100866	-0.996255
comp15982_c0_seq1	5.49641	7.98717	14.5819	9.35516	0.971051	12.4245	27.5187	27.1082	22.3505	1.34929	0.802492	5.71754	2.62714	3.04906	0.484166
comp15985_c0_seq1	6.7018	12.1248	6.73774	8.52146	0.930514	32.0656	40.1099	69.1561	47.1105	1.67312	89.3807	65.3252	131.599	95.435	1.97971
comp15994_c0_seq1	122.927	22.0224	15.8876	53.6125	1.72927	61.3009	18.743	9.88241	29.9754	1.47677	1.87872	2.88935	0.701948	1.82334	0.260867
comp16002_c0_seq1	6.81204	19.0443	4.31968	10.0587	1.00254	0.157491	0.419954	0.345664	0.307703	-0.511868	24.7401	65.1153	70.8232	53.5595	1.72884
comp16012_c0_seq1	5.29169	6.58438	5.66948	5.84852	0.767046	0	0.116596	0	0.0388652	-1.41044	0	0	0	0	NA
comp16030_c0_seq1	6.30945	8.31092	2.46312	5.6945	0.755455	0.123479	0	0.295651	0.13971	-0.854772	0	0	0	0	NA
comp16039_c0_seq1	3.00988	10.2141	7.02834	6.75076	0.829353	11.3577	10.2794	10.7189	10.7854	1.03283	19.6169	29.3062	50.4233	33.1155	1.52003
comp16058_c0_seq3	9.01983	4.76929	11.5525	8.4472	0.926713	1.99675	2.03824	6.76053	3.59851	0.556123	0	0.388343	0.440279	0.276207	-0.558765
comp16096_c0_seq1	7.69612	11.0058	9.95165	9.55118	0.980057	9.26468	14.2664	10.4269	11.3193	1.05382	99.3443	98.4026	58.7797	85.5089	1.93201
comp16103_c0_seq1	8094.49	2750.92	6774.28	5873.23	3.76888	7811.52	7107.66	16787.8	10569	4.02403	802.919	2247.4	2256.15	1768.82	3.24768
comp16103_c1_seq1	12197.6	2771.74	10710.9	8560.09	3.93248	14779.9	9317.25	19367.4	14488.2	4.16101	634.308	1163.76	2005.5	1267.86	3.10307
comp16117_c0_seq1	6.30783	7.92923	7.06089	7.09931	0.851216	7.12229	9.57216	10.3415	9.01199	0.954821	45.1473	21.1128	38.7907	35.0169	1.54428
comp16132_c0_seq2	9.01083	23.2151	0.10251	10.7762	1.03246	0	0.876996	0.147652	0.341549	-0.466546	0.380423	0	0	0.126808	-0.896854
comp16134_c0_seq1	5.97737	6.13537	1.23156	4.4481	0.648175	6.58554	6.07301	2.95651	5.20502	0.716422	31.848	22.6104	53.5145	35.991	1.55619
comp16182_c0_seq2	13.587	13.1296	22.4328	16.3831	1.2144	7.88894	7.56434	11.1263	8.85987	0.947428	3.28573	3.63188	1.75379	2.89046	0.460967
comp16228_c0_seq1	10.0907	8.89002	38.3229	19.1012	1.28106	1.87606	2.11647	6.21963	3.40406	0.531997	0	0	0.407303	0.135768	-0.867203
comp16240_c0_seq1	152.255	0.366179	0.30014	50.9738	1.70735	0	0	0	0	NA	0.424323	0	0	0.141441	-0.849425
comp16270_c0_seq1	6.55796	10.9285	2.02678	6.50443	0.813209	1.50955	0.0774087	0	0.528986	-0.276556	0	0	0.491596	0.163865	-0.785513
comp16306_c0_seq1	3.40491	3.59719	7.62427	4.87546	0.688015	8.98199	11.9117	18.6462	13.1799	1.11991	43.4521	45.6717	56.4318	48.5185	1.68591
comp16308_c0_seq1	14.7075	22.7682	16.6588	18.0448	1.25635	0.112759	0	0.67496	0.262573	-0.58075	0	0	0	0	NA
comp16355_c0_seq1	145.264	116.081	262.633	174.659	2.24219	39.5554	21.9371	113.164	58.2187	1.76506	2.63643	4.24085	2.46264	3.11331	0.493222
comp16359_c0_seq1	13.7621	26.0156	4.67475	14.8175	1.17077	12.2938	14.4649	3.01715	9.92528	0.996743	0.325029	0.612091	0.824066	0.587062	-0.231316
comp16364_c0_seq1	5.09994	1.73067	3.34632	3.39231	0.530496	31.6254	15.0922	11.037	19.2515	1.28447	21.5203	24.6211	32.2779	26.1398	1.4173
comp16386_c0_seq1	5.75222	5.22052	16.868	9.28026	0.96756	2.38761	6.76453	5.00217	4.7181	0.673767	0.13151	0.247658	0.701948	0.360372	-0.443249
comp16389_c0_seq2	180.264	833.915	504.655	506.278	2.70439	166.591	632.047	331.457	376.698	2.57599	21.8096	141.84	66.7223	76.7905	1.88531
comp16408_c0_seq1	15.1782	21.77	30.5369	22.495	1.35209	21.7638	28.525	37.8902	29.393	1.46824	377.068	239.982	378.339	331.796	2.52087
comp16433_c0_seq1	8.44905	17.7747	0.952746	9.05882	0.957072	15.8358	22.7548	0.609915	13.0668	1.11617	111.796	85.2914	141.692	112.927	2.0528
comp1646_c0_seq1	3.63694	4.78784	10.465	6.29659	0.799106	4.61666	7.52305	18.2557	10.1318	1.00569	34.5214	23.9145	37.642	32.026	1.5055
comp16462_c0_seq1	4.13898	3.88764	6.44157	4.82273	0.683293	8.46468	6.44894	6.31712	7.07692	0.849844	31.2439	38.5869	21.2532	30.3614	1.48232
comp16500_c0_seq3	22.3352	12.4209	15.8075	16.8545	1.22672	8.98381	3.09185	11.5678	7.88114	0.896589	3.09049	1.71314	3.76476	2.85613	0.455778
comp16502_c0_seq2	57.4912	58.835	13.9668	43.431	1.6378	0.178766	0.0397237	0.0713382	0.0966094	-1.01498	0	0.0741712	0.168181	0.0807842	-1.09267
comp16515_c0_seq2	9.43097	15.6601	12.9293	12.6735	1.1029	33.3296	38.0832	27.486	32.9663	1.51807	258.808	457.054	271.461	329.108	2.51734
comp16540_c0_seq2	166.781	110.463	572.561	283.268	2.4522	106.04	96.5307	321.924	174.832	2.24262	2.95679	9.23593	10.7181	7.63695	0.88292
comp16571_c0_seq1	12.8939	10.0013	37.4015	20.0989	1.30317	1.64381	2.55691	9.67566	4.62546	0.665155	0.905416	3.23963	4.05951	2.73485	0.436934
comp16579_c0_seq2	17.7751	50.6042	51.7488	40.0427	1.60252	0.566526	3.42416	1.37907	1.78992	0.252833	0.973578	1.01074	1.38575	1.12336	0.0505175
comp16582_c0_seq2	28.2396	62.2417	60.688	50.3898	1.70234	22.7081	46.6329	33.5349	34.292	1.53519	8.48171	16.2003	9.20495	11.2957	1.05291
comp16596_c0_seq1	39.6612	59.3874	24.5716	41.2067	1.61497	0	0.18122	0	0.0604068	-1.21891	0.449199	0.0845926	0.767246	0.433679	-0.362832
comp16640_c0_seq1	18.3114	13.0981	35.6199	22.3432	1.34914	15.5759	20.4107	35.0565	23.681	1.3744	2.82379	7.42268	3.76807	4.67151	0.669458
comp16657_c0_seq1	47.2663	30.5476	0.620148	26.1447	1.41738	0	0	0	0	NA	0	0	0	0	NA
comp16665_c0_seq1	6.52688	12.9721	11.3891	10.296	1.01267	1.17257	0.981634	0.652916	0.935706	-0.0288605	4.25362	4.10702	0.192408	2.85102	0.455
comp16672_c0_seq1	6.50063	10.2299	17.3945	11.375	1.05595	13.6515	38.9401	29.6576	27.4164	1.43801	159.006	258.407	323.435	246.949	2.39261
comp16678_c0_seq2	8.32144	21.1792	14.5049	14.6685	1.16639	23.5162	44.7746	26.3749	31.5552	1.49907	89.9877	71.3802	84.4196	81.9292	1.91344
comp16681_c0_seq1	5.17049	4.21106	6.80735	5.3963	0.732096	3.99898	3.69117	4.23508	3.97508	0.599346	0.203321	0	0.325575	0.176299	-0.753751
comp16686_c0_seq1	17.3462	19.1453	9.21252	15.2347	1.18283	1.37767	2.7552	4.12328	2.75205	0.439656	1.07615	3.97525	2.20926	2.42022	0.383855
comp16719_c0_seq1	34.5175	45.9729	31.1693	37.2199	1.57078	21.5943	18.3694	3.42269	14.4621	1.16023	0.562881	2.68789	0.81549	1.35542	0.132074
comp16738_c0_seq1	26.5803	53.5154	8.2627	29.4528	1.46913	68.0325	206.689	54.3323	109.685	2.04015	717.033	1585.34	1178.22	1160.2	3.06453
comp16749_c0_seq1	11.0344	13.0912	9.59132	11.239	1.05073	16.7967	33.7626	18.8806	23.1467	1.36449	43.2216	90.6511	118.335	84.0694	1.92464
comp16751_c0_seq1	5.78611	6.34471	1.89772	4.67618	0.669891	0.468354	0.507356	0.770964	0.582225	-0.234909	5.99781	9.50967	13.3013	9.60292	0.982403
comp16784_c0_seq1	21.927	19.2358	157.831	66.3312	1.82172	19.1997	25.5593	99.2886	48.0159	1.68138	0.618097	1.89149	10.7635	4.42436	0.645851
comp16792_c0_seq1	111.457	87.2838	1.4453	66.7287	1.82431	0	0	0	0	NA	0	0.721484	0	0.240495	-0.618895
comp16796_c0_seq1	41.1684	48.8343	61.9942	50.6656	1.70471	32.0543	53.1471	20.0893	35.0969	1.54527	0.181083	3.49539	2.41637	2.03095	0.307699
comp16803_c0_seq1	3.88334	3.05921	2.18602	3.04286	0.483282	5.46648	7.56328	6.1739	6.40122	0.806263	30.4049	40.8254	25.9081	32.3795	1.51027
comp16804_c0_seq1	9.05672	13.1445	1.66554	7.9556	0.900673	0	0	0	0	NA	0	0	0	0	NA
comp16810_c0_seq1	49.8504	21.1604	18.2221	29.7443	1.4734	3.1211	1.38708	0.911343	1.80651	0.25684	17.4091	8.59098	5.94421	10.6481	1.02727
comp16815_c0_seq2	4.46059	4.74535	7.84473	5.68356	0.75462	4.68626	4.35255	2.42692	3.82191	0.582281	49.3503	57.7737	30.911	46.0117	1.66287
comp16815_c1_seq1	3.5092	1.30249	2.23686	2.34952	0.370978	3.26214	2.60957	2.73374	2.86849	0.457653	23.5021	17.4599	11.0483	17.3368	1.23897
comp16834_c0_seq1	5.761	5.61157	3.99617	5.12291	0.709517	4.91904	8.08161	4.90113	5.96726	0.775775	22.7801	32.0362	25.8409	26.8857	1.42952
comp16847_c0_seq1	8.59619	5.85955	4.05416	6.16997	0.790283	1.99544	0.492675	0.0884774	0.858863	-0.0660759	13.7264	13.1087	5.84045	10.8919	1.0371
comp16850_c0_seq2	56.4682	136.483	24.4507	72.4673	1.86014	0.291626	0	0.174563	0.155396	-0.808559	0	0.181496	0	0.0604986	-1.21825
comp16879_c0_seq1	22.5847	22.4122	7.0822	17.3597	1.23954	0.0410152	2.07799	0.491024	0.870011	-0.0604755	0.325314	2.80788	5.70117	2.94479	0.469054
comp16895_c0_seq1	35.2711	113.966	62.4955	70.5776	1.84867	10.9587	37.1399	14.5585	20.8857	1.31985	0.373849	1.58406	1.69614	1.21802	0.0856535
comp16900_c0_seq1	587.078	905.397	830.352	774.276	2.8889	134.922	287.183	108.024	176.71	2.24726	7.72622	32.4016	11.9277	17.3518	1.23935
comp16908_c0_seq1	54.1875	100.357	50.9096	68.4847	1.83559	98.4988	126.766	60.0438	95.1027	1.97819	1020.22	1035.74	957.67	1004.54	3.00197
comp16916_c0_seq1	20.751	14.6301	36.1573	23.8461	1.37742	0.798209	0.0709482	0.573358	0.480838	-0.318001	0.562759	0.132473	0.0750946	0.256776	-0.590446
comp16939_c0_seq1	6.30945	3.43194	6.85756	5.53298	0.742959	16.5237	18.5583	15.9652	17.0157	1.23085	58.6441	155.597	58.0098	90.7502	1.95785
comp16945_c0_seq2	20.6426	11.9077	25.6328	19.3944	1.28768	9.65793	9.1373	16.6365	11.8106	1.07227	2.92695	3.41219	7.61802	4.65238	0.667676
comp16955_c0_seq1	32.9603	8.64056	10.4096	17.3368	1.23897	14.0749	4.92993	5.78331	8.26271	0.917123	3.62659	0.593874	1.00995	1.74347	0.241415
comp16974_c0_seq2	32.3295	31.2241	26.3056	29.9531	1.47644	40.0033	13.8544	27.0217	26.9598	1.43072	0.239418	0.338152	0.0638959	0.213822	-0.669948
comp16988_c0_seq1	4.70032	30.126	4.75161	13.1927	1.12033	5.29966	6.16382	2.21387	4.55912	0.658881	0.119247	0.505271	0.254597	0.293038	-0.533076
comp17020_c0_seq1	3.10911	2.30799	3.36311	2.92674	0.466384	12.4279	12.4594	13.379	12.7555	1.1057	483.186	107.566	154.988	248.58	2.39547
comp17021_c0_seq1	345.288	48.9782	125.032	173.099	2.2383	0.764722	5.09788	1.43865	2.43375	0.386276	0.144415	0.407942	0	0.184119	-0.734901
comp17025_c0_seq2	33.733	31.0168	21.7839	28.8445	1.46006	6.26651	1.90503	6.10921	4.76025	0.67763	43.7939	44.8693	60.9518	49.8717	1.69785
comp17040_c0_seq1	41.0227	64.7828	23.9249	43.2435	1.63592	49.8142	127.749	34.7297	70.7644	1.84981	656.483	552.448	470.846	559.926	2.74813
comp17041_c0_seq1	3.50738	57.8586	10.4785	23.9481	1.37927	5.21672	14.4901	1.38785	7.03157	0.847052	0.574677	0.901855	0.204493	0.560342	-0.251547
comp17050_c0_seq1	4.41351	8.27692	14.4299	9.04011	0.956174	7.94644	8.2915	5.9975	7.41181	0.869924	0	0.430047	1.95024	0.793429	-0.100492
comp17052_c0_seq1	39.5682	87.0967	23.826	50.1636	1.70039	23.48	25.125	28.1324	25.5791	1.40789	12.5813	7.21191	2.62717	7.47345	0.873521
comp17072_c0_seq2	14.9872	17.4699	57.842	30.0997	1.47856	9.24272	13.5311	31.5682	18.114	1.25802	2.27594	5.7523	4.34773	4.12532	0.615458
comp17090_c0_seq1	9.80081	16.5668	25.5465	17.3047	1.23816	0.77012	8.72757	6.09158	5.19642	0.715705	0	0	0.931527	0.310509	-0.507926
comp17098_c0_seq2	25.0745	15.974	24.5938	21.8808	1.34006	5.56006	8.45121	10.6306	8.21394	0.914551	0.415356	2.31257	2.60257	1.77683	0.249646
comp17100_c0_seq2	33.7829	45.1297	9.1009	29.3378	1.46743	0.163023	0.724507	0.477074	0.454868	-0.342115	1.74798	4.39654	3.70644	3.28365	0.516357
comp17106_c0_seq1	26.9076	32.7402	46.4022	35.35	1.54839	95.8072	143.019	115.376	118.067	2.07213	148.837	192.003	215.244	185.361	2.26802
comp17121_c0_seq1	23.9974	23.7689	74.9811	40.9158	1.61189	28.911	44.197	104.796	59.3014	1.77306	1.88732	11.2179	10.0108	7.70533	0.886791
comp17153_c0_seq1	24.7782	50.168	41.2671	38.7378	1.58813	9.60386	23.3846	10.9854	14.6579	1.16607	0.197927	1.63737	0.211291	0.682194	-0.166092
comp17177_c0_seq1	39.2343	47.9749	54.0243	47.0778	1.67282	17.7166	27.2128	19.1327	21.354	1.32948	0.362166	0.795699	1.9331	1.03032	0.0129728
comp1718_c0_seq2	3.43273	10.8826	2.34516	5.5535	0.744567	1.74668	8.95687	4.02131	4.90829	0.69093	46.0021	73.7531	72.9986	64.2512	1.80788
comp17193_c0_seq2	28.1099	27.6226	31.3445	29.0257	1.46278	9.55556	14.8016	20.1027	14.82	1.17085	2.82068	3.88768	3.70937	3.47258	0.540652
comp17194_c0_seq1	5.45276	34.5321	34.5349	24.8399	1.39515	41.4076	84.8288	90.1188	72.1184	1.85805	85.9196	160.381	338.674	194.992	2.29002
comp17217_c0_seq2	7.96983	8.503	2.35116	6.27467	0.797591	0.179606	0.239461	0.0537548	0.157607	-0.802424	0.356138	1.67669	1.64747	1.22676	0.088761
comp17221_c0_seq1	3.81793	16.8203	8.07338	9.57054	0.980937	1.1955	4.64892	1.78903	2.54448	0.405599	0	0.372015	0	0.124005	-0.906561
comp17228_c0_seq1	6.2621	5.8831	2.61076	4.91865	0.691846	0.187529	0	0	0.0625098	-1.20405	0	0	0	0	NA
comp17259_c0_seq1	49.8997	118.868	22.487	63.7517	1.80449	9.96284	30.9533	7.58676	16.1676	1.20865	1.77213	1.28939	0.601931	1.22115	0.0867696
comp17272_c0_seq2	7.48959	32.3552	8.31465	16.0532	1.20556	1.61232	18.3697	0.658033	6.88002	0.83759	0	0.273666	0	0.0912221	-1.0399
comp17302_c0_seq1	437.413	134.402	504.256	358.69	2.55472	323.748	46.6464	297.189	222.528	2.34738	30.1161	18.6347	48.6836	32.4781	1.51159
comp17321_c0_seq1	13.6701	1.40574	14.4348	9.83687	0.992857	0	0.13691	0.122936	0.0866153	-1.06241	0.203619	0	0	0.0678731	-1.1683
comp1734_c0_seq1	3.66109	9.38008	26.3409	13.1274	1.11818	3.37611	20.183	9.77854	11.1125	1.04581	0	1.08447	0.384219	0.489562	-0.310193
comp17364_c0_seq1	17.6255	17.2445	14.2087	16.3596	1.21377	15.4585	8.86696	12.8245	12.3833	1.09284	2.24214	3.88903	4.51412	3.54843	0.550037
comp17391_c0_seq2	5.96653	1.95943	3.21211	3.71269	0.569689	7.15673	4.58007	6.85429	6.19703	0.792183	53.5474	32.96	8.07957	31.529	1.49871
comp17395_c0_seq1	4.14548	0.329712	0.240222	1.57181	0.196399	15.6072	1.92671	32.7556	16.7632	1.22436	41.5178	20.146	19.5774	27.0804	1.43266
comp17422_c0_seq1	132.869	130.81	53.4461	105.708	2.02411	7.83703	4.47806	5.14513	5.82007	0.764928	4.39225	2.06786	3.00696	3.15569	0.499094
comp17444_c0_seq1	5.96037	14.0178	12.2884	10.7555	1.03163	9.53849	16.2582	12.9866	12.9278	1.11152	0.914784	1.55975	1.21409	1.22954	0.0897433
comp17462_c0_seq1	213.01	231.754	212.421	219.061	2.34057	384.508	454.207	326.993	388.57	2.58947	1098.91	947.99	738.428	928.442	2.96775
comp17483_c0_seq5	13.4497	10.07	60.3597	27.9598	1.44653	22.1434	13.8176	59.5834	31.8482	1.50308	1.55321	1.53749	2.76347	1.95139	0.290344
comp17495_c0_seq1	2.10245	1.65626	2.22779	1.9955	0.300052	1.45186	2.53131	3.47626	2.48648	0.395584	6.20066	24.6746	19.464	16.7798	1.22479
comp17540_c0_seq2	15.4121	13.768	2.83899	10.673	1.02829	0	0	0	0	NA	0	0	0	0	NA
comp17626_c0_seq1	15.5334	35.011	19.7171	23.4205	1.3696	8.66385	7.27298	1.42686	5.7879	0.762521	1.78763	0.684702	0.0646894	0.845675	-0.0727963
comp17635_c0_seq1	62.3553	62.5021	21.603	48.8202	1.6886	18.4004	10.5611	13.1381	14.0332	1.14716	9.70776	9.96242	9.66459	9.77826	0.990261
comp17639_c0_seq1	7.58957	13.2998	2.65322	7.84754	0.894734	13.0464	3.76259	9.47099	8.75999	0.942504	114.548	48.9476	100.737	88.0776	1.94487
comp17654_c0_seq1	7.26875	3.90294	6.56873	5.91347	0.771842	2.83965	0.91229	2.8671	2.20635	0.343674	0.27136	0.0851703	0.193121	0.183217	-0.737034
comp17663_c0_seq1	77.0447	78.2369	79.6503	78.3106	1.89382	30.7777	39.5841	30.6309	33.6642	1.52717	26.5075	15.6334	16.7151	19.6187	1.29267
comp17680_c0_seq1	12.1338	25.8276	25.4643	21.1419	1.32514	4.32271	2.73757	4.26941	3.77656	0.577097	0.142858	0	0	0.0476192	-1.32222
comp17706_c0_seq1	206.209	229.259	105.335	180.268	2.25592	36.9877	45.2073	24.8795	35.6915	1.55256	6.90491	7.33516	3.84307	6.02771	0.780152
comp17714_c0_seq1	8.38951	9.75584	14.8194	10.9882	1.04093	2.79683	4.66114	6.37465	4.61087	0.663783	0.284401	0.937265	1.66982	0.963828	-0.0160004
comp17744_c0_seq1	10.822	18.7951	6.47341	12.0302	1.08027	0.399408	0.372761	1.00414	0.592102	-0.227604	0.316792	0.919728	0.563637	0.600052	-0.221811
comp1778_c0_seq1	3.29977	5.14738	3.94767	4.13161	0.616119	3.64137	6.33248	5.40181	5.12522	0.709713	31.9164	26.5052	23.0122	27.1446	1.43368
comp17780_c0_seq1	2.96826	4.1207	0	2.36299	0.373461	67.0255	164.545	88.7098	106.76	2.02841	29.9101	150.183	65.2752	81.7893	1.9127
comp178_c0_seq1	1.70851	1.01462	5.38585	2.70299	0.431845	2.79527	3.72684	5.47598	3.99936	0.601991	247.575	191.996	337.088	258.886	2.41311
comp17813_c0_seq1	4.41173	9.14227	11.1313	8.22842	0.915317	12.3706	30.1899	15.5181	19.3595	1.28689	111.841	138.38	146.565	132.262	2.12143
comp17821_c0_seq1	5.81172	22.7599	0.408602	9.66008	0.984981	8.29587	9.55853	0.343315	6.0659	0.782896	100.459	90.869	69.7217	87.0165	1.9396
comp17851_c0_seq1	5.03967	5.92575	8.03363	6.33302	0.801611	10.104	12.7407	16.242	13.0289	1.11491	40.5626	30.9368	49.0234	40.1743	1.60395
comp17868_c0_seq1	66.5562	263.576	138.744	156.292	2.19394	41.0205	159.76	40.9756	80.5854	1.90626	0.51318	15.7848	2.55654	6.28484	0.798294
comp17882_c0_seq1	11.1747	20.7839	13.7765	15.245	1.18313	6.52958	17.8375	9.94898	11.4387	1.05838	0.724333	3.97849	1.15986	1.95423	0.290975
comp17893_c0_seq2	2.15565	4.45771	9.36866	5.32734	0.726511	16.2315	17.2325	18.5923	17.3521	1.23935	419.865	143.795	112.548	225.403	2.35296
comp17954_c0_seq1	4955.39	740.97	91.4155	1929.26	3.28539	13.8147	5.9821	0	6.59892	0.819473	4.2143	0	0.166624	1.46031	0.164444
comp17968_c0_seq1	9.20463	25.1552	15.6694	16.6764	1.2221	7.51857	9.72501	4.83639	7.35999	0.866877	0	0.977755	0.15836	0.378705	-0.421699
comp18004_c0_seq2	9.01253	11.3325	3.87963	8.07489	0.907136	0	0	0	0	NA	0	0	0	0	NA
comp18046_c0_seq2	9.119	5.70047	76.4273	30.4156	1.4831	7.31698	4.52082	37.6027	16.4802	1.21696	0	0.222136	1.63699	0.619707	-0.207813
comp18078_c0_seq1	9.47538	31.5268	4.5299	15.1774	1.1812	0	0.880782	0	0.293594	-0.532253	0	0	0	0	NA
comp18083_c0_seq2	7.20247	6.68526	3.6996	5.86244	0.768079	4.59112	7.48973	3.91003	5.33029	0.726751	47.5662	33.4052	37.0826	39.3513	1.59496
comp1810_c0_seq1	18.2087	46.6938	25.9677	30.2901	1.4813	6.89633	6.29106	8.59037	7.25925	0.860892	7.2341	6.91585	3.66427	5.93807	0.773646
comp18139_c0_seq1	185.701	71.6532	235.092	164.149	2.21524	98.3531	70.6297	189.612	119.531	2.07748	13.0016	30.6477	30.0561	24.5685	1.39038
comp1814_c0_seq1	2.88084	3.73038	3.5145	3.37524	0.528305	2.70621	0.451011	3.77978	2.31233	0.36405	35.7741	16.9827	41.3721	31.3763	1.4966
comp18169_c0_seq1	6.66775	3.77118	4.62267	5.02054	0.70075	13.1337	8.27888	14.8677	12.0934	1.08255	31.2395	17.5711	35.5552	28.122	1.44905
comp18178_c0_seq4	10.1009	7.69497	12.9967	10.2642	1.01132	0	0	0.0917651	0.0305884	-1.51444	0	0	0	0	NA
comp18185_c0_seq4	6.72483	52.0341	7.73747	22.1655	1.34568	0.964068	1.8477	4.61663	2.47613	0.393774	2.4692	0.524997	1.7006	1.56493	0.194496
comp18190_c0_seq1	30.2601	50.199	11.4053	30.6215	1.48603	0.192999	0.463174	0.323476	0.32655	-0.486051	0.357183	0.288276	0.0544715	0.23331	-0.632066
comp18192_c0_seq3	34.6194	44.6578	24.1529	34.4767	1.53753	104.621	105.502	79.2567	96.4599	1.98435	98.2505	326.625	260.798	228.558	2.359
comp18207_c0_seq1	9.56249	12.1108	2.54041	8.07123	0.906939	0.163012	0.0543345	0.097577	0.104975	-0.978916	1.31988	3.32256	2.47293	2.37179	0.375076
comp18210_c0_seq1	10.3303	27.0137	15.212	17.5187	1.2435	9.94195	23.6184	12.0105	15.1903	1.18157	0.716865	1.79999	1.02036	1.17907	0.07154
comp18213_c0_seq1	9.98932	20.2431	20.1413	16.7912	1.22508	19.7886	15.83	21.5932	19.0706	1.28036	48.4157	77.972	97.2351	74.5409	1.87239
comp18217_c0_seq1	15.0167	26.1071	28.0043	23.0427	1.36253	6.21833	19.1193	13.4709	12.9362	1.11181	0.559195	2.05349	0.895429	1.16937	0.0679521
comp18239_c0_seq1	3.69681	3.48476	6.47428	4.55195	0.658198	11.3635	7.49381	18.2851	12.3808	1.09275	0.88838	3.19389	0.517289	1.53319	0.185595
comp18242_c0_seq1	7.71903	13.616	0.850316	7.39511	0.868945	0	0	0	0	NA	0.150267	0	0	0.0500889	-1.30026
comp18292_c0_seq1	15.2858	29.7167	6.17107	17.0579	1.23192	2.22321	1.4541	0.703056	1.46012	0.164389	1.44173	5.90003	3.61092	3.65089	0.562399
comp18339_c0_seq1	5.47252	23.059	4.14372	10.8918	1.0371	0	0	0	0	NA	0	0	0	0	NA
comp18343_c0_seq2	4.84984	32.6657	34.4842	23.9999	1.38021	5.02016	19.0074	9.68603	11.2378	1.05068	1.12752	3.82201	3.57657	2.84203	0.453629
comp18359_c0_seq1	364.744	202.687	16.48	194.637	2.28923	191.008	42.9709	7.72627	80.5683	1.90616	8.58278	1.64534	1.48133	3.90315	0.591415
comp18377_c0_seq1	12.1403	16.9008	11.0822	13.3744	1.12627	14.8499	27.5138	9.76532	17.3763	1.23996	75.849	86.345	55.3904	72.5281	1.86051
comp18382_c0_seq1	91.1916	39.541	2.33311	44.3552	1.64694	0.325457	0	0.194814	0.173424	-0.760891	2.95783	0.810205	0.34446	1.37083	0.136984
comp18387_c0_seq2	3.12802	5.17479	1.74012	3.34764	0.524739	3.0241	7.28848	5.36095	5.22451	0.718046	16.2981	16.8663	20.5171	17.8939	1.2527
comp18389_c0_seq2	5.8055	18.8969	7.03042	10.5776	1.02439	26.6975	30.5434	50.3157	35.8522	1.55452	5.59083	5.15462	3.85454	4.86666	0.687231
comp18408_c0_seq2	24.663	43.8435	14.3203	27.6089	1.44105	48.9231	37.3317	21.7031	35.986	1.55613	174.77	217.009	234.407	208.729	2.31958
comp18418_c0_seq1	8.87747	10.5196	2.59923	7.33211	0.865229	1.65718	1.88872	0.0639977	1.2033	0.0803737	0.282666	0.798471	0	0.360379	-0.44324
comp18422_c0_seq1	94.6108	219.934	24.6614	113.069	2.05334	36.9341	56.7069	5.05792	32.8996	1.51719	0.592047	1.41225	0.168539	0.72428	-0.140094
comp18470_c0_seq1	6042.08	2001.72	519.267	2854.35	3.45551	26.9524	10.1938	4.29541	13.8139	1.14032	2.93615	0.637999	0.301385	1.29184	0.11121
comp18475_c0_seq1	20.7085	45.05	42.5597	36.1061	1.55758	51.3994	54.0991	45.9764	50.4916	1.70322	301.476	317.137	355.17	324.594	2.51134
comp18509_c0_seq2	5.26543	7.41203	6.0753	6.25092	0.795944	9.0498	18.292	8.02147	11.7878	1.07143	108.052	152.54	88.2913	116.294	2.06556
comp18535_c0_seq2	5.55753	18.5738	14.6776	12.9363	1.11181	14.0272	12.6906	26.8388	17.8522	1.25169	60.0989	137.809	66.4544	88.1206	1.94508
comp18543_c0_seq1	7.36277	3.71977	11.8889	7.65715	0.884067	1.10741	0.82026	2.79883	1.5755	0.197419	0	1.0721	0.17364	0.415246	-0.381694
comp18564_c0_seq2	34.1847	35.1857	8.57629	25.9823	1.41468	0.224315	0	0	0.0747718	-1.12626	0.494214	0.18614	0	0.226785	-0.644386
comp18616_c0_seq1	35.1616	34.4913	1.21385	23.6222	1.37332	0	0	0	0	NA	0.298783	0.23805	0.0490703	0.195301	-0.709295
comp18618_c0_seq1	16.2773	28.581	15.8692	20.2425	1.30626	2.93456	4.54833	4.91845	4.13378	0.616347	18.378	23.286	56.165	32.6097	1.51335
comp18623_c0_seq1	16.4094	17.0122	1.04358	11.4884	1.06026	0.0440553	0.0587372	0.105484	0.0694254	-1.15848	0.26207	0.0548364	0.18651	0.167806	-0.775194
comp18625_c0_seq1	18.1919	31.8386	22.7252	24.2519	1.38475	10.4069	12.4035	14.8373	12.5492	1.09862	3.877	8.91052	5.9189	6.23547	0.79487
comp1863_c0_seq1	2.76568	1.75975	5.25671	3.26071	0.513313	3.90787	8.08955	10.9573	7.65158	0.883751	40.2398	34.6894	43.247	39.3921	1.59541
comp18678_c0_seq1	35.6591	85.8965	65.1064	62.2207	1.79393	41.7496	60.3294	71.4945	57.8578	1.76236	11.9962	19.905	13.9189	15.2734	1.18393
comp18682_c0_seq2	6.3669	2.86956	3.13607	4.12418	0.615337	13.9088	10.653	10.0971	11.553	1.06269	40.6849	23.022	68.4888	44.0652	1.6441
comp18685_c0_seq1	62.3876	67.652	12.8499	47.6298	1.67788	5.01413	1.23799	0.963412	2.40518	0.381147	9.45149	9.55441	10.4391	9.81499	0.99189
comp18687_c0_seq1	17.5178	26.7436	4.70372	16.3217	1.21277	0	0	0	0	NA	0.0426274	0	0	0.0142091	-1.84743
comp18697_c0_seq1	8.27278	3.33376	18.9839	10.1968	1.00846	0	0	0.552401	0.184134	-0.734866	0	0.191446	0.21705	0.136165	-0.865933
comp18699_c0_seq1	4.98478	10.4995	2.54992	6.0114	0.778976	13.6352	19.77	8.72298	14.0427	1.14745	73.1127	127.714	100.899	100.575	2.00249
comp18736_c0_seq1	332.094	279.792	497.561	369.816	2.56799	99.3059	59.3509	184.512	114.39	2.05839	10.3016	8.80304	14.4621	11.1889	1.04879
comp18740_c0_seq1	47.4872	6.58294	38.4056	30.8252	1.48891	17.9912	0.131797	22.1155	13.4128	1.12752	1.27409	0.0615219	0.278998	0.538204	-0.269053
comp1875_c0_seq1	3.17388	5.3853	5.46505	4.67475	0.669758	1.68596	1.12391	3.43126	2.08038	0.318143	0	0	0.47584	0.158613	-0.79966
comp18785_c0_seq1	180.467	332.441	235.051	249.32	2.39676	227.555	431.12	244.413	301.029	2.47861	28.81	74.6002	37.5772	46.9958	1.67206
comp18790_c0_seq1	10.256	38.9265	11.6046	20.2624	1.30669	0.630341	0	0.201234	0.277192	-0.55722	0.388857	1.30766	0.385462	0.693994	-0.158644
comp18812_c0_seq1	51.2743	33.3128	74.1947	52.9273	1.72368	54.9974	54.2721	38.2174	49.1623	1.69163	1.48636	5.51707	7.35871	4.78738	0.680098
comp18815_c0_seq1	31.6381	66.8461	60.6294	53.0379	1.72459	39.3765	49.652	56.1112	48.3799	1.68467	2.03061	8.25428	5.44572	5.24354	0.719624
comp18864_c0_seq1	71.776	57.586	61.3952	63.5857	1.80336	37.9856	33.4391	27.6973	33.0407	1.51905	13.6723	16.3658	12.8799	14.306	1.15552
comp18884_c0_seq1	5.11318	8.81351	4.17639	6.03436	0.780631	14.9386	8.00707	6.57557	9.84041	0.993013	38.3385	28.0606	38.8829	35.094	1.54523
comp18889_c0_seq1	42.637	42.6082	3.76991	29.6717	1.47234	0	0	0	0	NA	0.185059	0	0.0395109	0.0748566	-1.12577
comp18893_c0_seq2	53.2748	69.0519	48.8979	57.0748	1.75644	56.1046	69.1535	45.774	57.0107	1.75596	548.663	731.708	592.812	624.394	2.79546
comp18894_c0_seq1	445.149	345.304	678.155	489.536	2.68978	292.921	431.036	697.778	473.912	2.6757	70.4606	175.307	129.524	125.097	2.09725
comp18902_c0_seq2	86.2362	50.7761	118.091	85.0345	1.9296	54.6712	32.2095	77.4006	54.7604	1.73847	1.7902	5.57557	2.59264	3.31947	0.521069
comp18905_c0_seq1	5.32976	10.3078	15.7042	10.4473	1.019	13.9063	34.6183	32.5726	27.0324	1.43188	46.4461	60.5829	107.507	71.512	1.85438
comp18917_c0_seq1	9.65445	1.59262	18.5242	9.92376	0.996676	0.930714	0.265904	1.3132	0.836605	-0.0774795	0.395465	0.0827484	0.844334	0.440849	-0.35571
comp18920_c0_seq4	28.0095	19.0817	16.1855	21.0922	1.32412	0.493284	0.179366	0.161058	0.277903	-0.556107	0	0	0	0	NA
comp18945_c0_seq1	6.19663	2.13702	0.467099	2.93358	0.467399	27.0128	5.34484	3.31913	11.8923	1.07526	72.3095	18.0009	38.543	42.9511	1.63297
comp18955_c0_seq1	16.5933	19.5015	2.74665	12.9471	1.11217	0.0278871	0.706435	0.133543	0.289288	-0.538669	8.5526	9.14649	10.291	9.33003	0.969883
comp18962_c0_seq1	9.60003	31.9119	15.1986	18.9035	1.27654	6.78011	16.9419	13.3581	12.36	1.09202	1.45423	4.69473	2.4712	2.87339	0.458394
comp18970_c0_seq3	10.5902	8.46845	17.2825	12.1137	1.08328	9.84458	10.7486	11.3079	10.6337	1.02668	0.984829	2.02021	1.4268	1.47728	0.169462
comp18988_c0_seq1	19.4474	53.034	53.5166	41.9993	1.62324	24.0794	35.8016	33.5218	31.1343	1.49324	5.38076	12.5642	8.79495	8.91329	0.950038
comp19006_c0_seq5	77.747	67.7536	77.969	74.4899	1.8721	15.2568	20.645	40.2229	25.3749	1.4044	0.109462	0.515346	1.98651	0.870438	-0.0602623
comp1902_c0_seq1	20.5339	11.5677	2.70901	11.6035	1.06459	0.30179	0.724257	1.01163	0.679225	-0.167987	6.54268	10.1424	11.3284	9.33783	0.970246
comp19032_c0_seq2	230.741	135.284	72.7321	146.253	2.1651	264.881	193.474	155.072	204.476	2.31064	1818.15	844.486	1077.41	1246.68	3.09576
comp19033_c0_seq3	19.872	31.4825	4.89883	18.7511	1.27303	1.04102	0.381006	0.439863	0.620629	-0.207168	0.485699	0.431924	0.230442	0.382688	-0.417155
comp19054_c0_seq1	6.66923	5.73056	11.3364	7.91206	0.89829	5.691	6.61265	9.82003	7.37456	0.867736	0.672454	0.949768	0.493528	0.70525	-0.151657
comp1908_c0_seq1	2.76625	2.18309	3.22088	2.7234	0.435112	7.46331	6.82506	8.13304	7.4738	0.873542	30.5465	14.0537	28.0181	24.2061	1.38392
comp19113_c0_seq1	18.197	13.4711	44.7344	25.4675	1.40599	0.845795	0.563834	0.934676	0.781435	-0.107107	0	0	0	0	NA
comp19116_c0_seq1	54.5479	63.1897	10.9854	42.9076	1.63253	0.193479	0.0967342	0.0289535	0.106389	-0.973104	0.309049	0.120413	0.170646	0.200036	-0.698892
comp19120_c0_seq4	21.459	32.6351	37.079	30.391	1.48275	9.63406	14.0537	13.4062	12.3646	1.09218	0.659251	2.73693	0.959677	1.45195	0.161952
comp19128_c0_seq1	42.1846	42.5918	81.0513	55.2759	1.74254	31.8376	32.6331	49.6056	38.0254	1.58007	4.35241	5.6447	4.60246	4.86652	0.687219
comp19147_c0_seq1	15.7492	15.1689	0	10.306	1.01309	3.44479	2.66383	0.494882	2.20117	0.342653	27.0493	33.9593	33.9314	31.6467	1.50033
comp19159_c0_seq2	14.9515	9.91996	18.0391	14.3035	1.15544	0	0	0	0	NA	0	0	0	0	NA
comp19200_c0_seq4	52.2973	10.5499	81.3437	48.0636	1.68182	10.685	1.05067	9.76725	7.16762	0.855375	3.67672	1.41364	1.99519	2.36185	0.373253
comp19204_c0_seq1	13.9356	4.31898	4.76777	7.67412	0.885029	0.91781	0.30592	0	0.40791	-0.389436	0.101106	0	0	0.0337021	-1.47234
comp19211_c0_seq5	37.1577	33.7125	54.1024	41.6575	1.61969	18.1735	22.809	25.6967	22.2264	1.34687	7.80254	12.3387	9.81474	9.98532	0.999362
comp19221_c0_seq2	11.194	9.91224	10.5733	10.5599	1.02366	4.89079	4.16215	3.55045	4.20113	0.623366	25.5171	24.4154	22.3941	24.1089	1.38218
comp19228_c0_seq1	3.64286	8.71356	3.09608	5.15083	0.711878	0	0	0	0	NA	0	0	0	0	NA
comp19238_c0_seq1	34.5233	52.3144	10.8015	32.5464	1.5125	0.761657	1.52323	1.44374	1.24288	0.0944286	4.02742	15.5638	12.7189	10.7701	1.03222
comp19263_c0_seq1	3.97617	1.79206	2.36171	2.70998	0.432966	7.57727	20.821	13.7729	14.0571	1.14789	66.9402	153.148	191.951	137.346	2.13782
comp19276_c0_seq1	25.0458	29.3809	29.1812	27.8693	1.44513	33.3785	43.4584	46.2252	41.0207	1.613	91.843	87.556	185.737	121.712	2.08533
comp19281_c0_seq1	6.67089	8.80749	13.3365	9.60495	0.982495	19.5029	18.3547	21.3068	19.7214	1.29494	44.8407	49.6704	53.1628	49.2247	1.69218
comp19297_c0_seq2	65.8919	97.0322	196.995	119.973	2.07908	13.4408	36.5369	50.4972	33.4916	1.52494	0.307002	1.98737	0.737394	1.01059	0.0045738
comp19321_c0_seq2	8.57622	8.34656	1.3297	6.08416	0.7842	6.95387	3.15681	0.0510736	3.38725	0.529847	169.582	71.2893	106.259	115.71	2.06337
comp19368_c0_seq1	10.0623	3.57089	26.464	13.3657	1.12599	0	0.260836	0.468424	0.243087	-0.614239	0.258618	0.243513	0.13804	0.213391	-0.670825
comp19389_c0_seq2	33.5911	40.4455	82.3795	52.1387	1.71716	33.6608	27.1132	31.3825	30.7188	1.4874	150.76	247.437	186.65	194.949	2.28992
comp19404_c0_seq1	5.53213	2.53291	16.7717	8.27892	0.917974	5.28958	4.09214	37.5654	15.649	1.19449	91.1607	125.585	50.4089	89.0514	1.94964
comp19409_c0_seq1	4.63927	10.683	2.30431	5.87553	0.769047	9.78355	19.1225	9.17538	12.6938	1.10359	72.8425	113.772	172.771	119.795	2.07844
comp19414_c0_seq1	6.67225	14.5869	11.7183	10.9925	1.0411	9.18447	23.8545	12.8518	15.2969	1.1846	228.223	383.999	225.959	279.394	2.44622
comp19454_c0_seq1	29.4292	23.6657	20.4555	24.5168	1.38946	5.50666	3.30476	4.40058	4.404	0.643847	4.30062	0.683671	1.21234	2.06554	0.315034
comp19457_c0_seq1	7.25771	13.2777	4.06002	8.19848	0.913733	0.422142	0.0804039	0.288788	0.263778	-0.578761	1.35524	0	0.595721	0.650321	-0.186872
comp19473_c0_seq1	4.666	13.0751	3.47404	7.07172	0.849525	2.68136	5.047	2.14004	3.28947	0.517125	17.0278	14.8553	50.3035	27.3955	1.43768
comp19483_c0_seq1	8.66362	17.1675	3.0983	9.64315	0.984219	0.368168	0.490865	0.220381	0.359804	-0.443934	0.790873	1.14566	0.779328	0.905288	-0.0432132
comp19484_c0_seq1	6.21745	4.77098	1.5545	4.18098	0.621278	0.649407	2.77066	0.217687	1.21258	0.0837118	85.5721	120.15	47.2146	84.3123	1.92589
comp19499_c0_seq1	5.87477	17.9425	14.8882	12.9018	1.11065	0.23301	0.543661	0	0.25889	-0.586884	3.61926	2.82781	4.68568	3.71092	0.569481
comp19533_c1_seq1	643.133	73.2706	683.339	466.581	2.66893	180.49	1.01092	309.99	163.83	2.21439	9.85615	0.0786482	12.3495	7.42811	0.870879
comp19609_c0_seq1	8.81876	15.8289	18.3802	14.3426	1.15663	3.84826	8.45489	10.1874	7.49686	0.874879	0.573197	2.76606	0.611899	1.31705	0.119603
comp19612_c0_seq1	25.7911	31.3388	10.757	22.629	1.35467	2.34051	0.502456	1.1398	1.32759	0.123063	0.471963	0.518464	0.111962	0.367463	-0.434786
comp19616_c0_seq1	13.1525	14.9306	18.7423	15.6085	1.19336	23.7862	27.6009	23.4197	24.9356	1.39682	123.46	77.1999	169.99	123.55	2.09184
comp19619_c0_seq1	267.892	0.990838	30.1847	99.6892	1.99865	1.51997	0	0	0.506658	-0.295285	0.430563	0	0	0.143521	-0.843084
comp1962_c0_seq1	4.0111	4.3159	6.53085	4.95262	0.694835	7.56653	12.3192	9.66817	9.85131	0.993494	25.1022	32.2392	29.0559	28.7991	1.45938
comp19656_c0_seq2	10.18	7.8086	9.73195	9.24017	0.96568	4.35408	3.08561	0.798325	2.746	0.438701	0.155561	2.9051	0.055355	1.03867	0.0164788
comp19693_c0_seq2	25.0422	33.7064	39.7019	32.8168	1.5161	26.9501	34.1012	27.1904	29.4139	1.46855	0.78906	3.19479	1.01081	1.66489	0.221384
comp19695_c0_seq1	32.6	28.6021	37.5927	32.9316	1.51761	19.743	16.2353	14.0162	16.6648	1.2218	0.365018	2.64648	0.623463	1.21165	0.0833787
comp19702_c0_seq2	8.87981	7.14377	19.731	11.9182	1.07621	5.00971	5.00945	16.7657	8.9283	0.950769	250.6	161.561	117.773	176.645	2.2471
comp19703_c0_seq1	5.9852	2.61139	7.05552	5.21737	0.717452	0.0635865	0	0	0.0211955	-1.67376	0.0840567	0.0791474	0	0.0544014	-1.26439
comp19707_c0_seq1	5.13825	7.06297	4.16098	5.45407	0.73672	7.54566	9.93137	10.4232	9.30009	0.968487	1.4067	0.722479	0.0682584	0.732481	-0.135204
comp19713_c0_seq1	7.33149	15.4083	8.44541	10.3951	1.01683	3.71745	2.75352	1.18678	2.55259	0.406981	0	0.102826	0	0.0342754	-1.46502
comp19738_c0_seq6	375.091	212.587	312.658	300.112	2.47728	110.871	94.4732	209.207	138.184	2.14046	10.7597	21.2094	14.5456	15.5049	1.19047
comp19756_c0_seq1	5.34813	8.41048	21.1648	11.6411	1.066	0.388027	0	0.116134	0.168054	-0.774551	0.448826	0.96597	0.547578	0.654125	-0.18434
comp19758_c0_seq1	10.2787	35.645	2.28071	16.0681	1.20597	0	0.979957	0	0.326652	-0.485914	0	1.13851	0	0.379504	-0.420783
comp1976_c0_seq1	5.19817	12.4425	11.0162	9.55229	0.980108	16.0153	29.0837	14.7104	19.9365	1.29965	138.159	124.763	97.8057	120.243	2.08006
comp19776_c0_seq1	16.6339	8.80371	11.3664	12.268	1.08877	0	1.00873	1.26808	0.758938	-0.119794	0.100016	0	0	0.0333386	-1.47705
comp19789_c0_seq1	13.2977	13.2817	17.051	14.5434	1.16267	22.2331	13.3719	16.709	17.438	1.2415	174.489	123.18	176.472	158.047	2.19879
comp19791_c1_seq1	15.1496	16.9052	5.56787	12.5409	1.09833	0	0	0	0	NA	0	0	0	0	NA
comp19793_c0_seq2	9.8249	25.7815	3.69591	13.1008	1.1173	9.05036	14.7635	5.32349	9.71244	0.987328	65.4673	71.8452	76.8272	71.3799	1.85358
comp1980_c0_seq1	4.98494	16.002	7.37002	9.45233	0.975539	7.91534	12.2898	14.7539	11.653	1.06644	0.662247	0.748282	1.13114	0.847223	-0.0720024
comp19802_c0_seq1	14.7652	12.6713	5.73707	11.0579	1.04367	4.18912	3.8504	3.60936	3.88296	0.589163	1.51028	1.50108	1.34355	1.45164	0.161858
comp19816_c0_seq3	19.6103	44.9727	21.1696	28.5842	1.45613	10.1777	40.3995	11.1974	20.5915	1.31369	2.17992	6.09365	4.50877	4.26078	0.629489
comp1983_c0_seq1	11.1683	10.9956	19.8148	13.9929	1.14591	17.9441	5.87853	14.6079	12.8102	1.10756	1.49102	0.510524	1.1576	1.05305	0.0224485
comp19857_c0_seq1	10.3137	13.4007	0.60304	8.10581	0.908796	0	0	0	0	NA	0	0	0	0	NA
comp19859_c0_seq1	9.41514	19.8683	19.7329	16.3388	1.21322	5.00131	13.7284	8.03021	8.91996	0.950363	1.24449	5.27313	2.98917	3.16893	0.500912
comp19880_c0_seq2	15.6043	21.5046	3.37356	13.4941	1.13015	0.326889	0.314766	0.152189	0.264615	-0.577386	1.22435	0.519909	1.33265	1.02564	0.0109932
comp19932_c0_seq1	120.968	235.294	275.865	210.709	2.32368	57.1216	134.829	66.778	86.243	1.93572	1.0376	3.90799	0.464502	1.80337	0.256084
comp19935_c1_seq6	50.2251	38.9527	174.22	87.7994	1.94349	62.7441	42.8343	144.544	83.374	1.92103	5.64032	13.6217	12.0748	10.4456	1.01893
comp19941_c0_seq1	26.4665	29.3277	34.8532	30.2158	1.48023	23.8808	23.4103	26.1947	24.4953	1.38908	5.64776	7.4389	9.37472	7.48713	0.874315
comp19944_c0_seq1	318.335	299.637	625.612	414.528	2.61755	78.2286	41.5946	264.251	128.025	2.10729	10.6203	5.1825	16.3854	10.7294	1.03058
comp19946_c0_seq1	155.98	108.479	204.069	156.176	2.19362	49.1472	16.7121	39.3744	35.0779	1.54503	1.22502	0.404727	0.527682	0.719142	-0.143185
comp19983_c0_seq1	10.7328	12.6887	13.3575	12.2597	1.08848	32.7229	25.9877	23.6957	27.4688	1.43884	93.255	83.7915	62.937	79.9945	1.90306
comp19994_c0_seq1	175.691	173.804	58.6919	136.062	2.13374	36.1362	17.8769	19.4478	24.487	1.38893	34.1349	27.8772	32.4891	31.5004	1.49832
comp20051_c0_seq1	71.5791	3.10058	7.27296	27.3175	1.43644	1.32582	2.73989	5.6347	3.23347	0.509669	0	1.23771	1.02904	0.755581	-0.121719
comp20123_c0_seq2	27.9587	45.4704	129.233	67.5542	1.82965	17.2717	48.6508	44.2469	36.7231	1.56494	0.182509	5.00082	2.16264	2.44866	0.388928
comp20124_c0_seq1	5.42489	1.47511	4.127	3.67567	0.565337	2.53441	3.31008	2.53877	2.79442	0.446291	30.9049	124.962	22.7	59.5223	1.77468
comp20135_c0_seq1	94.7617	105.298	130.244	110.101	2.04179	69.7367	113.904	95.3599	93.0001	1.96848	19.6095	29.187	22.6533	23.8166	1.37688
comp20144_c0_seq1	5.3123	8.71692	0.324306	4.78451	0.679837	12.5998	12.3986	4.7296	9.90932	0.996044	20.7179	54.4762	63.8724	46.3555	1.6661
comp20161_c0_seq1	17.0339	26.2589	26.0011	23.098	1.36357	31.3604	39.7004	32.5503	34.537	1.53828	234.594	206.711	222.802	221.369	2.34512
comp20163_c0_seq3	10.142	9.75734	13.9595	11.2863	1.05255	6.76478	8.18987	11.5429	8.8325	0.946084	0.513939	0.967844	0.219456	0.56708	-0.246356
comp20188_c0_seq12	30.6924	45.8031	59.8346	45.4434	1.65747	1.49724	9.04407	2.6704	4.4039	0.643838	0.215427	0.240879	0.618053	0.35812	-0.445972
comp20198_c0_seq3	7.02306	22.2369	17.2091	15.4897	1.19004	1.02592	1.11913	4.0196	2.05489	0.312788	13.8086	8.0102	10.1344	10.651	1.02739
comp20200_c0_seq1	5.39421	6.99021	3.59986	5.32809	0.726572	2.79927	5.20151	3.06095	3.68724	0.566702	29.2829	63.4582	43.7641	45.5017	1.65803
comp20206_c0_seq2	247.573	177.409	154.534	193.172	2.28594	117.842	131.161	240.422	163.142	2.21257	6.88827	54.8325	8.66346	23.4614	1.37035
comp20208_c0_seq2	6.31891	5.62886	6.95719	6.30165	0.799454	5.75655	7.675	7.87612	7.10256	0.851415	50.7057	41.895	37.3849	43.3285	1.63677
comp20214_c0_seq2	44.3256	75.8833	71.3103	63.8397	1.80509	37.3197	60.3876	70.5969	56.1014	1.74897	8.90548	21.2965	19.1698	16.4573	1.21636
comp20235_c0_seq1	218.681	263.752	496.454	326.296	2.51361	141.451	198.116	190.392	176.653	2.24712	72.9437	90.3404	92.18	85.1547	1.93021
comp20243_c0_seq1	3.38126	5.96975	2.71134	4.02079	0.604311	26.4369	26.73	32.3819	28.5163	1.45509	19.046	38.2358	38.5541	31.9453	1.50441
comp20257_c0_seq1	7.95686	9.48611	16.7349	11.3926	1.05662	12.6133	10.9205	18.7915	14.1084	1.14948	92.7558	124.863	64.1226	93.9138	1.97273
comp20273_c0_seq1	169.476	86.433	152.169	136.026	2.13362	28.2715	12.3857	17.4285	19.3619	1.28695	0	0	0.227006	0.0756687	-1.12108
comp20275_c0_seq2	85.0478	115.875	139.713	113.545	2.05517	15.2333	33.0751	40.9903	29.7662	1.47372	7.02727	6.65241	10.8493	8.17633	0.912558
comp20278_c0_seq1	20.431	32.8638	24.929	26.0746	1.41622	28.261	42.0956	24.9567	31.7711	1.50203	415.528	490.133	384.964	430.208	2.63368
comp20316_c0_seq1	6.77557	12.0613	8.56979	9.13556	0.960735	12.1748	35.1438	16.0747	21.1311	1.32492	136.377	110.611	200.991	149.326	2.17414
comp20329_c0_seq1	42.6687	42.2379	102.341	62.4158	1.79529	27.402	35.0513	37.8464	33.4332	1.52418	3.84187	8.19471	4.33145	5.45601	0.736875
comp20332_c0_seq1	14.6494	20.3493	4.05143	13.0167	1.1145	0.537709	0	0	0.179236	-0.746574	0.0618097	0.0290998	0.131966	0.074292	-1.12906
comp20334_c0_seq2	8.73238	16.5762	4.3518	9.88679	0.995055	0	0.216458	0	0.0721525	-1.14175	0	0	0	0	NA
comp2034_c0_seq1	2.96402	1.0287	8.36934	4.12069	0.61497	11.2218	5.74417	4.91795	7.29462	0.863003	29.6687	18.0835	41.8522	29.8681	1.47521
comp20343_c0_seq2	24.8312	66.1519	104.234	65.0723	1.8134	26.7943	49.0479	60.2103	45.3509	1.65659	2.17786	5.04778	3.90891	3.71152	0.569552
comp20354_c0_seq1	17.947	15.2258	29.714	20.9623	1.32144	10.225	14.7293	27.4811	17.4785	1.2425	0.667189	0.698024	4.85377	2.07299	0.316598
comp20394_c0_seq1	17.8863	58.1223	9.04561	28.3514	1.45257	0.161232	0	0	0.053744	-1.26967	0	0	0.227528	0.0758427	-1.12009
comp20396_c0_seq1	12.5027	26.2827	32.6147	23.8	1.37658	27.894	59.9606	49.7407	45.8651	1.66148	85.3513	129.331	214.374	143.019	2.15539
comp20404_c0_seq2	19.4649	9.58533	0.434219	9.82815	0.992472	0	0	0	0	NA	0	0.0541897	0	0.0180632	-1.7432
comp20412_c0_seq1	15.1388	12.4747	8.6635	12.0923	1.08251	12.6589	7.32564	6.06199	8.68219	0.938629	0.284837	4.22417	0.152035	1.55368	0.191362
comp20414_c0_seq2	8.15059	26.075	13.7124	15.9793	1.20356	29.0066	51.8094	38.6049	39.807	1.59996	1184.02	1935.76	1949.38	1689.72	3.22782
comp20422_c0_seq1	7.15289	8.88683	2.32589	6.12187	0.786884	0	0	0	0	NA	0	0.0627603	0	0.0209201	-1.67944
comp20432_c0_seq1	12.7513	60.3413	43.4134	38.8353	1.58923	19.3967	96.9168	35.7533	50.6889	1.70491	205.901	262.895	276.981	248.593	2.39549
comp20448_c0_seq1	11.2369	20.2579	10.6665	14.0538	1.14779	2.28812	10.5447	6.19316	6.342	0.802226	0.13151	1.23829	0	0.4566	-0.340464
comp2046_c0_seq1	5.75364	27.2714	3.24714	12.0907	1.08245	1.11622	1.3642	0	0.826807	-0.0825957	0.491855	0.463128	0.262532	0.405838	-0.391647
comp20488_c0_seq1	218.894	124.987	44.14	129.341	2.11173	67.6624	24.2075	35.1332	42.3343	1.62669	16.8835	21.5735	29.4455	22.6342	1.35476
comp20495_c0_seq1	7.75365	22.8441	14.8425	15.1467	1.18032	2.53007	10.329	7.06753	6.64218	0.822311	0.103708	1.02533	0.525872	0.551637	-0.258347
comp20497_c0_seq2	15.6008	15.707	15.3795	15.5624	1.19208	12.5804	5.91716	8.63915	9.04558	0.956437	0.785325	1.67465	0.93698	1.13232	0.0539692
comp20512_c0_seq3	5.64849	7.31644	21.3692	11.4447	1.05861	4.16315	2.70028	3.9513	3.60491	0.556894	0	0	0	0	NA
comp20515_c0_seq1	9.8488	6.96291	3.73561	6.84911	0.835634	2.33047	0.147958	1.06285	1.18042	0.0720382	1.0269	0.138132	0.156606	0.440547	-0.356008
comp20530_c0_seq2	22.3649	19.3984	1.17778	14.3137	1.15575	0.0572538	0.229003	0.0342714	0.106843	-0.971254	0.151371	0	0	0.0504569	-1.29708
comp20533_c0_seq1	46.1167	38.1277	8.66303	30.9691	1.49093	0	0.162531	0	0.0541771	-1.26618	0.107433	0.101158	0	0.0695304	-1.15783
comp20534_c0_seq1	16.6665	25.3829	7.19882	16.4161	1.21527	0.69688	0.929124	1.43021	1.01874	0.00806191	0.263207	0.557627	0.737569	0.519467	-0.284442
comp20542_c0_seq1	15.0472	4.94445	14.639	11.5435	1.06234	4.57066	1.47094	3.11331	3.05164	0.484533	0.520869	0	0	0.173623	-0.760393
comp20558_c0_seq2	14.0736	10.3224	0.207945	8.20129	0.913882	0	0	0.0998395	0.0332798	-1.47782	292.696	702.652	203.481	399.61	2.60164
comp20598_c0_seq1	55.1438	52.2389	72.9761	60.1196	1.77902	49.3605	24.5855	74.6381	49.528	1.69485	6.59425	7.25558	4.0866	5.97881	0.776615
comp20615_c0_seq2	4.75089	10.6146	17.1817	10.8491	1.03539	4.71816	14.6292	16.2623	11.8699	1.07445	0.0580191	1.66623	1.79616	1.17347	0.0694721
comp20635_c0_seq5	5.42934	2.13247	2.33051	3.29744	0.518177	6.84162	3.38948	7.92207	6.05106	0.781831	25.4026	19.1724	28.8061	24.4604	1.38846
comp20650_c0_seq1	20.1921	30.2829	18.5662	23.0137	1.36199	1.74361	1.35212	1.70401	1.59991	0.204097	0.564472	2.23675	1.80776	1.53633	0.186483
comp2066_c0_seq1	10.6016	30.4488	41.775	27.6085	1.44104	2.05316	1.31395	7.27566	3.54759	0.549933	0	0	0	0	NA
comp20670_c0_seq1	12.7739	6.60026	20.4113	13.2618	1.1226	0	0.0673701	0.604935	0.224102	-0.649555	0.367385	0.0628959	0.213922	0.214734	-0.668098
comp20684_c0_seq2	6.04674	20.0232	8.3643	11.4781	1.05987	27.9238	52.4118	34.2112	38.1823	1.58186	310.455	601.888	826.035	579.459	2.76302
comp20710_c0_seq1	25.0429	10.824	5.71483	13.8606	1.14178	4.23124	1.53855	2.91652	2.89544	0.461714	0.169497	0.0797985	0	0.0830983	-1.08041
comp20728_c0_seq1	9.77955	12.5683	6.28425	9.54404	0.979732	28.4432	13.1048	14.8275	18.7918	1.27397	79.8164	65.6091	92.6237	79.3497	1.89955
comp20763_c0_seq1	8.63665	7.48758	2.19187	6.10537	0.785712	0.234412	0	0	0.0781372	-1.10714	0.061975	0	0	0.0206583	-1.6849
comp20771_c0_seq1	8.42992	14.6108	29.1266	17.3891	1.24028	32.5456	35.0988	48.4617	38.702	1.58773	187.954	203.221	268.172	219.782	2.34199
comp20806_c0_seq1	8.94954	9.14602	14.3064	10.8007	1.03345	2.83053	4.03903	5.7149	4.19482	0.622713	0.626997	1.39024	2.20232	1.40652	0.148145
comp20860_c0_seq2	24.7337	30.8213	3.82204	19.7923	1.2965	9.8948	14.9536	8.47408	11.1075	1.04562	212.578	412.765	315.636	313.66	2.49646
comp20866_c0_seq1	8.55407	9.18987	3.14851	6.96415	0.842868	0.127869	0	0.229622	0.119163	-0.923857	0	0	0	0	NA
comp20874_c0_seq1	3.00988	6.24193	4.34104	4.53095	0.656189	0.124355	8.95306	2.53086	3.86942	0.587646	133.483	27.8616	30.3593	63.9012	1.80551
comp20882_c0_seq1	7.14053	6.65372	4.14232	5.97886	0.776618	17.193	16.6166	14.3647	16.0581	1.20569	117.629	236.037	77.3329	143.666	2.15736
comp20889_c0_seq1	8.4866	12.505	14.9087	11.9668	1.07798	20.8083	23.8519	21.4173	22.0258	1.34293	43.1267	54.7246	63.4161	53.7558	1.73043
comp20910_c0_seq1	6.97927	9.61539	2.15699	6.25055	0.795918	0	0	0	0	NA	0.058643	0	0	0.0195477	-1.70891
comp20925_c0_seq1	315.285	183.985	118.849	206.04	2.31395	75.1158	40.3386	65.8294	60.4279	1.78124	22.4042	28.7005	27.4602	26.1883	1.41811
comp20930_c0_seq2	28.094	35.9225	50.6998	38.2387	1.5825	59.5396	68.9327	74.9414	67.8046	1.83126	153.872	146.204	193.351	164.476	2.2161
comp20935_c0_seq1	16.9286	9.69947	20.3816	15.6699	1.19507	7.51717	3.11375	14.1544	8.26176	0.917072	0.578863	1.27179	1.64786	1.16617	0.0667629
comp20937_c0_seq1	2.04214	2.0475	4.64745	2.91236	0.464246	2.89932	2.94519	6.44613	4.09688	0.612453	31.5741	37.9787	4.67597	24.7429	1.39345
comp20959_c0_seq1	9.36556	10.7706	15.4372	11.8578	1.074	13.3108	17.9237	15.7765	15.6703	1.19508	50.8293	55.0989	47.0223	50.9835	1.70743
comp20964_c1_seq1	19047	25946.4	43836.7	29610	4.47144	10070.9	8598.67	15524.2	11397.9	4.05683	311.486	911.146	1489.38	904.005	2.95617
comp20974_c0_seq1	11.3644	2.69205	35.4416	16.4993	1.21747	11.1405	4.75597	21.8125	12.5697	1.09932	0.145093	0.341547	0.15489	0.213844	-0.669904
comp21003_c0_seq1	15.994	22.303	11.5054	16.6008	1.22013	70.4778	61.4284	58.1045	63.3369	1.80166	417.216	272.705	426.286	372.069	2.57062
comp21069_c0_seq1	8.23136	16.565	9.17005	11.3221	1.05393	9.63302	15.9435	6.58995	10.7221	1.03028	321.239	233.311	300.071	284.874	2.45465
comp2111_c0_seq1	12.8823	15.1509	16.4835	14.8389	1.1714	11.2814	12.8526	9.4684	11.2008	1.04925	1.2625	3.90062	1.64256	2.26856	0.35575
comp21112_c0_seq3	2.69456	4.19101	2.9147	3.26676	0.514117	5.09321	11.3547	6.49729	7.64842	0.883571	27.8144	25.5663	29.1033	27.4946	1.43925
comp21147_c0_seq2	9.54494	16.3163	9.77436	11.8785	1.07476	0	1.78921	0	0.596403	-0.22446	0	0	0	0	NA
comp21152_c0_seq1	177.359	218.109	187.047	194.171	2.28819	137.692	394.824	214.388	248.968	2.39614	5.16454	43.8126	22.2904	23.7559	1.37577
comp21174_c0_seq1	286.014	428.513	80.2717	264.933	2.42314	0.188538	0.50274	0.827612	0.506297	-0.295595	0.33231	0.312902	0.354748	0.33332	-0.477139
comp2118_c0_seq1	11.4572	19.8463	5.87493	12.3928	1.09317	0	0	0	0	NA	0	0	0	0	NA
comp21180_c0_seq2	7.45611	4.16007	8.40778	6.67465	0.824429	7.64302	2.33108	2.8706	4.28157	0.631603	43.8479	16.9127	52.0252	37.5953	1.57513
comp21183_c0_seq7	33.5998	25.6598	39.617	32.9589	1.51797	24.397	17.6905	22.9526	21.68	1.33606	7.19943	7.03614	8.95604	7.73054	0.88821
comp21202_c0_seq1	10.0886	12.1093	3.53366	8.57719	0.933345	0.222301	1.11145	0.133067	0.488938	-0.310746	0.146933	1.38351	1.09798	0.87614	-0.0574265
comp2123_c0_seq1	4.19154	12.2238	11.2944	9.23659	0.965512	1.36375	2.72737	5.59767	3.2296	0.509148	0.257541	0.242499	2.3369	0.945647	-0.0242708
comp21230_c0_seq1	53.2176	90.5036	83.0862	75.6025	1.87854	51.1686	60.1319	81.8492	64.3833	1.80877	403.217	447.479	662.306	504.334	2.70272
comp21231_c0_seq1	130.032	208.93	225.458	188.14	2.27448	122.6	167.888	193.429	161.306	2.20765	45.686	73.159	45.6995	54.8482	1.73916
comp21253_c0_seq1	7.7454	6.68681	2.84721	5.75981	0.760408	0	0	0	0	NA	0	0	0	0	NA
comp21344_c0_seq1	8.45276	10.3417	2.83718	7.21056	0.857969	0	0	0	0	NA	0	0	0	0	NA
comp21351_c0_seq1	8.37118	11.8365	4.12901	8.11224	0.909141	0	0.111787	0.501883	0.204557	-0.689186	0.498764	0.417451	0.32538	0.413865	-0.383141
comp21379_c0_seq1	10.3015	17.4791	0.941671	9.57411	0.981099	0.539507	0	0	0.179836	-0.745124	0.427914	0	0	0.142638	-0.845765
comp21382_c0_seq1	12.0168	14.8384	18.3457	15.067	1.17803	24.7745	26.9488	31.928	27.8838	1.44535	230.58	299.404	195.44	241.808	2.38347
comp21392_c0_seq2	4.99573	6.40908	10.1675	7.19079	0.856776	2.99029	6.04068	3.36294	4.1313	0.616087	43.3626	18.3848	63.2978	41.6817	1.61995
comp21448_c0_seq1	5.2462	3.46745	6.56089	5.09152	0.706847	7.37199	7.77231	11.1881	8.77747	0.943369	17.9012	34.4737	65.6524	39.3424	1.59486
comp21450_c0_seq1	7.09333	8.50291	3.96732	6.52119	0.814327	27.1446	36.3617	12.7584	25.4216	1.4052	2393.27	2048.93	2238.23	2226.81	3.34768
comp21483_c0_seq1	11.972	17.2043	22.2453	17.1405	1.23402	5.08758	12.8394	6.43877	8.12192	0.909659	1.249	3.79957	2.20514	2.4179	0.383439
comp21498_c0_seq2	6.97944	9.73297	7.11822	7.94354	0.900014	1.75178	3.89263	0.0776735	1.90736	0.280433	0.557488	1.33251	0.549351	0.813116	-0.0898474
comp21515_c0_seq1	14.2447	14.9556	17.7108	15.637	1.19415	23.2163	51.1381	29.689	34.6811	1.54009	86.598	157.574	117.475	120.549	2.08116
comp21534_c0_seq1	12.9666	20.1033	23.0716	18.7138	1.27216	62.2008	64.4204	95.1921	73.9377	1.86887	66.8892	73.1161	116.551	85.5187	1.93206
comp21547_c0_seq2	30.9312	32.2656	35.7074	32.968	1.51809	44.9532	35.0536	39.2377	39.7481	1.59932	406.16	419.328	410.883	412.124	2.61503
comp21559_c0_seq2	8.64035	11.2589	4.60766	8.16898	0.912168	0.755956	1.20387	0.0502785	0.670034	-0.173903	564.587	588.54	667.783	606.97	2.78317
comp21581_c0_seq1	7.72728	10.1803	2.44521	6.78425	0.831502	0.0392259	0.0522985	0	0.0305081	-1.51558	0	0	0	0	NA
comp21589_c0_seq2	21.5183	35.3757	3.38881	20.0943	1.30307	0.650825	0.20417	0.458324	0.437773	-0.358751	0.556692	0.810094	0.216102	0.527629	-0.277671
comp21596_c0_seq7	27.741	23.6162	49.5943	33.6505	1.52699	14.2413	20.1296	25.3391	19.9033	1.29893	0.448238	1.68824	2.24141	1.4593	0.164143
comp21601_c0_seq6	22.675	30.4259	10.0398	21.0469	1.32319	1.27332	5.18479	0.494397	2.3175	0.36502	1.00084	2.05612	0.679905	1.24562	0.095387
comp21626_c0_seq1	6.83579	10.9828	5.58074	7.79977	0.892082	0	0.119961	0	0.039987	-1.39808	0.118941	0	0	0.039647	-1.40179
comp21643_c0_seq2	9.76632	11.455	4.36386	8.52839	0.930867	0	0	0.0523799	0.01746	-1.75796	0	0.16338	0.0617434	0.0750412	-1.1247
comp21649_c0_seq1	75.6159	126.793	115.658	106.022	2.0254	43.1976	116.823	87.3052	82.4419	1.91615	1.04924	10.2089	3.29237	4.85017	0.685757
comp21677_c0_seq1	8.99419	17.5525	22.9925	16.5131	1.21783	14.4247	23.876	26.5557	21.6188	1.33483	78.5051	98.8437	107.479	94.9426	1.97746
comp21684_c0_seq5	8.17525	28.908	21.8299	19.6377	1.29309	36.4298	75.8064	79.6561	63.9641	1.80594	85.8349	126.954	227.189	146.659	2.16631
comp21691_c0_seq1	30.2013	75.2683	67.4847	57.6514	1.76081	70.4804	158.452	77.614	102.182	2.00938	11.263	28.4138	12.2179	17.2982	1.238
comp21714_c0_seq1	30.958	21.0874	58.696	36.9138	1.56719	0.26693	0.0889721	0.639125	0.331676	-0.479286	0.264647	0.0830633	0.47086	0.272857	-0.564066
comp21716_c0_seq3	27.8056	17.9962	31.3352	25.7123	1.41014	17.097	20.322	26.6953	21.3714	1.32983	1.80357	5.12122	4.84344	3.92274	0.59359
comp21758_c0_seq5	18.6036	16.9337	33.4192	22.9855	1.36145	25.6845	14.7523	28.851	23.0959	1.36354	1.3124	1.67424	0.723103	1.23658	0.0922221
comp21764_c0_seq2	11.1237	14.4634	8.81882	11.4686	1.05951	11.2697	12.9875	6.3512	10.2028	1.00872	51.8647	68.0489	47.7109	55.8748	1.74722
comp21783_c0_seq2	92.5139	141.001	26.8016	86.7721	1.93838	0	0	0.103151	0.0343837	-1.46365	0.1139	0.214495	0	0.109465	-0.960724
comp2184_c0_seq1	10.3543	13.0926	1.10065	8.1825	0.912886	0.294277	0	0.293584	0.195954	-0.707847	0.0648354	0.244195	0	0.10301	-0.987121
comp2186_c0_seq1	9.92734	26.7459	8.08486	14.9194	1.17375	4.14032	2.46078	0.955505	2.51887	0.401205	0.131884	0.434635	0	0.18884	-0.723907
comp21879_c0_seq1	9.92493	14.6672	0.593682	8.39528	0.924035	0	0	0	0	NA	0	0	0	0	NA
comp21907_c0_seq1	11.881	7.95093	3.62626	7.81938	0.893173	8.0124	6.36568	2.82511	5.7344	0.758488	0	0.136619	0	0.0455397	-1.34161
comp21909_c0_seq1	9.15957	11.8617	15.8391	12.2868	1.08944	0.828945	2.90716	7.16248	3.63286	0.560249	0.0476437	0.358888	0.86463	0.423721	-0.37292
comp21921_c0_seq2	66.3066	51.4351	3.1592	40.3003	1.60531	5.30097	4.11629	0.836861	3.41804	0.533777	2.27166	0.145016	0	0.805559	-0.0939026
comp21927_c0_seq1	11.8579	0.293292	31.38	14.5104	1.16168	0.617032	0	0.861811	0.492948	-0.307199	0.27189	0.0640026	0.507935	0.281276	-0.550868
comp21928_c0_seq1	263.002	185.78	254.12	234.301	2.36977	78.4718	119.059	125.374	107.635	2.03195	0.633296	28.5433	7.88733	12.3546	1.09183
comp21962_c0_seq1	176.473	404.032	97.9622	226.156	2.35441	0.742441	0.791896	2.04431	1.19288	0.0765981	0.588872	0.862522	2.09544	1.18228	0.0727198
comp21970_c0_seq1	33.989	35.1007	5.21951	24.7698	1.39392	0	0.420133	1.1048	0.508312	-0.29387	0.178526	0	0.254107	0.144211	-0.841001
comp21993_c0_seq1	9.42155	13.8279	14.9375	12.729	1.10479	8.58307	12.9849	16.7343	12.7674	1.1061	1.11146	2.18031	3.55953	2.28377	0.358652
comp22007_c0_seq1	26.0056	9.9708	36.2339	24.0701	1.38148	11.497	7.8637	21.8995	13.7534	1.13841	0.903981	2.34076	0.904705	1.38315	0.140868
comp22008_c0_seq3	11.594	15.9787	8.37019	11.981	1.07849	10.4625	17.8114	13.5454	13.9397	1.14425	110.375	140.833	143.893	131.7	2.11959
comp22021_c0_seq3	5.73893	7.38431	4.74451	5.95591	0.774948	0	0.0474187	0	0.0158062	-1.80117	0.188062	0.309887	0.20076	0.232903	-0.632825
comp22039_c0_seq7	7.53519	23.741	17.7005	16.3256	1.21287	4.07905	9.50409	7.84653	7.14323	0.853894	0.811449	2.93299	3.24141	2.32862	0.367098
comp22059_c0_seq1	9.13393	7.24502	14.6653	10.3481	1.01486	25.1274	14.4314	44.6271	28.062	1.44812	53.8037	99.2603	61.2552	71.4397	1.85394
comp22071_c0_seq1	21.2197	31.329	35.4682	29.339	1.46744	1.07396	0.730544	1.04956	0.951355	-0.0216575	0.115893	0	0	0.0386311	-1.41306
comp22082_c0_seq1	37.2701	42.6858	35.3069	38.421	1.58457	8.5561	2.61088	14.1745	8.44716	0.926711	0.637214	5.39997	0.850298	2.29583	0.360939
comp22096_c0_seq9	5.13998	6.05283	4.29143	5.16141	0.712769	6.58	10.4717	5.03153	7.36106	0.866941	41.4802	24.2867	17.5245	27.7638	1.44348
comp22098_c0_seq2	9.56536	21.2433	5.66203	12.1569	1.08482	0.837751	2.6062	0.879768	1.44124	0.158736	0.69944	0.768353	0.601481	0.689758	-0.161303
comp22115_c0_seq3	10.5814	25.2276	28.2246	21.3445	1.32929	39.2245	66.8772	73.8197	59.9738	1.77796	79.3249	88.053	144.817	104.065	2.01731
comp22121_c0_seq1	6.0667	15.0506	10.227	10.4481	1.01904	2.46091	3.00762	1.47307	2.31387	0.364339	0.994016	1.02105	0.675266	0.896776	-0.0473158
comp22124_c0_seq1	16.4802	42.523	53.9412	37.6482	1.57574	13.9833	44.5981	45.0024	34.5279	1.53817	0.670532	6.22837	6.07468	4.32453	0.635939
comp22133_c0_seq1	14.2804	19.3888	11.9734	15.2142	1.18225	20.8415	12.8576	17.4848	17.0613	1.23201	3.66117	3.00092	0.64671	2.43627	0.386725
comp22147_c0_seq1	11.2139	20.1908	6.50758	12.6374	1.10166	5.48968	10.5988	5.88976	7.32609	0.864872	98.1474	30.7677	30.8608	53.2586	1.72639
comp22153_c0_seq3	20.7376	107.438	58.2489	62.1415	1.79338	4.527	36.1563	8.29796	16.3271	1.21291	0	2.64217	0.366799	1.00299	0.0012969
comp22168_c0_seq2	15.703	33.2563	33.3179	27.4257	1.43816	14.6872	23.9815	22.7823	20.4837	1.31141	2.07941	4.46926	2.41284	2.98717	0.47526
comp22177_c0_seq2	7.42954	14.4327	17.8256	13.2293	1.12154	2.34538	4.08917	5.64267	4.02574	0.604846	0	0.112282	0	0.0374275	-1.42681
comp22202_c0_seq4	12.5675	16.6764	10.8554	13.3664	1.12602	7.42898	10.3308	13.2929	10.3509	1.01498	61.7745	60.4534	40.6946	54.3075	1.73486
comp22227_c0_seq1	16.0755	32.0344	19.7404	22.6168	1.35443	4.91483	5.84436	20.2915	10.3502	1.01495	3.72263	6.48133	2.13695	4.11364	0.614226
comp22230_c0_seq4	206.286	237.736	110.602	184.875	2.26688	155.575	61.9738	21.4842	79.6776	1.90134	1.74694	5.5784	1.51354	2.94629	0.469276
comp22266_c0_seq2	11.6529	24.3821	15.1706	17.0685	1.2322	0.0898028	2.81367	0.215019	1.0395	0.0168236	0	1.45313	0	0.484376	-0.314817
comp22277_c0_seq1	29.4326	16.0977	25.5471	23.6925	1.37461	8.84849	10.183	18.2314	12.421	1.09416	3.94006	5.50694	9.13512	6.19404	0.791974
comp22283_c0_seq1	9.98238	15.1632	30.1459	18.4305	1.26554	1.69684	1.88528	2.2007	1.9276	0.285018	0.560774	0	0.399092	0.319955	-0.494911
comp22317_c0_seq1	17.7691	3.6501	4.46778	8.629	0.93596	0.095989	0	0.0766104	0.0575331	-1.24008	0	0.238959	0.316069	0.185009	-0.732807
comp22323_c0_seq4	10.3593	5.29007	10.1035	8.58431	0.933705	5.24464	3.08143	7.50258	5.27622	0.722323	0.822563	0.829844	0.564495	0.738967	-0.131375
comp22330_c0_seq1	10.9748	14.7458	27.4592	17.7266	1.24862	4.9595	7.91396	6.35815	6.41054	0.806895	0	1.16659	0.440867	0.535818	-0.270983
comp22334_c0_seq2	299.305	54.1314	174.924	176.12	2.24581	20.8429	3.59303	17.765	14.067	1.1482	0.270568	0.339687	1.25163	0.620627	-0.207169
comp22350_c0_seq6	17.0676	6.91503	1.72447	8.56905	0.932933	0.0813642	0.10848	0.389629	0.193158	-0.714088	0.537788	1.51913	0.746329	0.934417	-0.0294594
comp22368_c0_seq1	10.6191	13.0923	15.6189	13.1101	1.11761	11.8145	20.9579	17.665	16.8125	1.22563	80.0912	111.913	72.3589	88.121	1.94508
comp22377_c0_seq1	9.46501	9.32934	14.8203	11.2049	1.04941	21.6522	17.6531	21.2593	20.1882	1.3051	69.3944	51.3691	70.5628	63.7754	1.80465
comp22385_c0_seq3	17.6305	20.2459	25.3174	21.0646	1.32355	14.5903	12.1343	14.9475	13.8907	1.14272	4.47406	8.14229	5.25778	5.95805	0.775104
comp22402_c0_seq5	23.4045	26.8983	33.6188	27.9738	1.44675	27.1798	35.9521	43.8302	35.654	1.55211	154.373	130.042	117.669	134.028	2.1272
comp22408_c0_seq3	10.0035	9.07303	13.7294	10.9353	1.03883	5.09012	4.79621	8.67189	6.18607	0.791415	2.03804	1.64486	1.96844	1.88378	0.275031
comp22417_c0_seq2	10.9001	7.53865	9.3922	9.27699	0.967407	4.27336	5.16888	2.84806	4.09677	0.612441	1.16476	0.548364	0.6217	0.778274	-0.108868
comp22449_c0_seq4	9.19801	24.3983	9.38463	14.327	1.15615	100.574	217.247	76.9203	131.58	2.11919	400.434	466.986	510.091	459.17	2.66197
comp22450_c0_seq1	54.0836	36.117	135.612	75.2708	1.87663	45.5351	55.8646	104.018	68.4727	1.83552	2.09259	6.13228	3.37362	3.86616	0.58728
comp22460_c0_seq4	8.18179	23.8915	19.642	17.2384	1.2365	1.16803	2.75242	2.53651	2.15232	0.332906	0	0.270487	0.0766651	0.115717	-0.936602
comp22465_c1_seq4	3762.33	3457.98	5039.87	4086.72	3.61138	3980.38	2670	4994.53	3881.64	3.58901	249.759	260.055	90.4798	200.098	2.30124
comp22466_c0_seq7	66.5042	119.263	17.4265	67.7314	1.83079	0.137306	1.79404	0.230131	0.720492	-0.142371	0	0.717811	0.232517	0.316776	-0.499248
comp22488_c0_seq1	3.97474	59.0113	1.5076	21.4979	1.3324	0.80616	0.716549	2.81492	1.44588	0.160131	0	0	0.474017	0.158006	-0.801328
comp22489_c0_seq1	10.1925	12.3246	4.3992	8.97208	0.952893	0.0871254	0.406564	1.43419	0.642625	-0.192043	0.0863801	0.0542233	0.184425	0.108343	-0.9652
comp22524_c0_seq1	8.84153	1.88549	9.0487	6.59191	0.819011	0.0718606	0.0958091	0.172059	0.113243	-0.945988	0	0.0894463	0.101409	0.0636183	-1.19642
comp22555_c0_seq1	18.8402	34.3323	80.8172	44.6632	1.64995	25.8029	56.6565	57.0788	46.5127	1.66757	0.107061	4.01215	0.880029	1.66641	0.221783
comp22559_c0_seq1	75.6064	46.7848	121.755	81.3821	1.91053	38.8614	15.3976	128.269	60.8426	1.78421	3.95597	2.72811	8.56512	5.08307	0.706126
comp22567_c0_seq2	12.9667	15.6293	14.9129	14.503	1.16146	12.3041	13.3134	13.0269	12.8814	1.10996	224.263	238.024	302.427	254.905	2.40638
comp22609_c0_seq1	12.9691	10.8803	2.29403	8.71448	0.940241	0.122669	0	0	0.0408896	-1.38839	0.0405398	0	0	0.0135133	-1.86924
comp22614_c0_seq2	11.0665	9.72456	1.38246	7.39117	0.868713	0	0	0	0	NA	0	0	0	0	NA
comp22616_c1_seq1	20.6786	19.4834	25.5633	21.9084	1.34061	3.61698	10.028	9.49195	7.71232	0.887185	1.45658	1.01372	1.58873	1.35301	0.131302
comp22629_c0_seq1	8.68854	37.8599	3.94058	16.8297	1.22608	2.04046	8.34813	3.85578	4.74812	0.676522	0.370224	2.5647	1.07274	1.33589	0.125771
comp22636_c0_seq1	250.446	443.817	197.651	297.305	2.4732	113.081	217.087	57.4203	129.196	2.11125	15.0025	51.2395	18.1563	28.1328	1.44921
comp22637_c0_seq2	12.7964	5.97586	7.76446	8.84557	0.946726	31.2265	16.3739	28.7084	25.4363	1.40545	218.322	129.102	276.801	208.075	2.31822
comp22657_c0_seq2	96.3311	64.737	2.10842	54.3922	1.73554	0	0	0	0	NA	0.186299	0	0	0.0620995	-1.20691
comp22666_c0_seq3	6.68669	10.9028	4.0563	7.21527	0.858252	0.314262	0.0739402	0.088524	0.158909	-0.798852	0.195497	0.184079	0.156523	0.1787	-0.747876
comp22677_c0_seq1	10.0787	13.4717	6.72277	10.0911	1.00394	0.754923	0.239646	0.537961	0.510843	-0.291712	0.665302	0.134238	0.10146	0.300334	-0.522396
comp22679_c0_seq1	5.34679	3.74365	4.80805	4.63283	0.665846	0.311396	0.0638727	0.114706	0.163325	-0.786947	0	0	0	0	NA
comp22731_c0_seq2	12.3744	5.36927	4.81696	7.5202	0.876229	6.04136	2.77232	5.65149	4.82172	0.683202	0	0.0349758	0.23792	0.0909652	-1.04112
comp22810_c0_seq1	12.9525	16.2681	40.0305	23.0837	1.36331	29.7405	49.1225	50.5079	43.1236	1.63472	351.628	570.26	687.659	536.516	2.72958
comp22826_c0_seq4	31.0375	78.3225	92.3253	67.2284	1.82755	22.2873	47.0653	37.8335	35.7287	1.55302	1.48488	8.72995	9.43353	6.54945	0.816205
comp22834_c0_seq7	6.72464	11.7826	11.5536	10.0203	1.00088	9.75698	20.7104	26.1474	18.8716	1.27581	24.5278	60.6473	69.1613	51.4455	1.71135
comp22856_c0_seq1	21.378	23.1045	6.33855	16.9404	1.22892	0.375059	0.0277807	0.498901	0.30058	-0.52204	0.798789	0.726199	0.529277	0.684755	-0.164465
comp22867_c0_seq1	67124.6	52880.6	35787.3	51930.8	4.71543	5368.31	2325.84	1276.56	2990.23	3.47571	52.4245	38.2047	18.874	36.5011	1.56231
comp22873_c0_seq4	28.1642	43.9646	84.755	52.2946	1.71846	21.349	31.7351	60.932	38.0053	1.57984	2.78856	3.12848	4.53916	3.4854	0.542252
comp22874_c0_seq1	7.94654	13.6887	39.5317	20.3889	1.30939	0.839952	8.47907	9.12195	6.14699	0.788662	1.70519	0.821467	0.253998	0.926884	-0.0329745
comp22881_c0_seq1	21.9011	39.0433	8.25209	23.0655	1.36296	0	0	0	0	NA	0.142273	0.133963	0	0.0920788	-1.03584
comp22886_c0_seq1	37.3887	16.5161	5.88717	19.9306	1.29952	4.36252	0.383498	0.114785	1.62027	0.209587	0.158432	0.447537	0.236782	0.280917	-0.551422
comp22892_c0_seq1	813.743	990.142	206.777	670.221	2.82622	124.595	67.6557	53.1352	81.7954	1.91273	79.0604	120.054	89.244	96.1196	1.98281
comp22934_c0_seq2	59.3055	96.9178	3.89562	53.373	1.72732	8.55059	7.93791	0.505509	5.66467	0.753175	0	0.157675	0	0.0525584	-1.27936
comp22937_c0_seq2	7.79559	6.6136	34.4893	16.2995	1.21217	0.598645	2.60449	3.62113	2.27476	0.356935	0.0833015	0.862799	0.533556	0.493219	-0.30696
comp22973_c0_seq1	10.6944	14.1047	25.8669	16.8887	1.2276	29.2523	33.9056	41.6208	34.9262	1.54315	61.9828	82.787	89.7977	78.1892	1.89315
comp22975_c0_seq2	55.4119	50.2174	1.93698	35.8554	1.55455	0	0.0986389	0	0.0328796	-1.48307	0	0	0	0	NA
comp22977_c0_seq1	52.9044	91.5906	25.4652	56.6534	1.75323	5.99847	45.8115	6.55516	19.4551	1.28903	0.447307	2.90998	0.4341	1.2638	0.101677
comp22981_c0_seq1	16.9294	33.578	15.553	22.0201	1.34282	0.114977	0.306589	0.481767	0.301111	-0.521274	2.73584	6.72636	7.8693	5.77717	0.761715
comp22992_c0_seq1	5.94903	6.88399	8.13168	6.98823	0.844367	5.93683	8.45751	13.6696	9.35466	0.971028	146.103	114.975	238.118	166.399	2.22115
comp23048_c0_seq1	27.7248	126.908	11.2198	55.2841	1.7426	5.91508	15.4911	2.78197	8.06271	0.906481	3.12772	3.99685	1.72908	2.95121	0.470001
comp23062_c0_seq1	13.8055	2.94955	21.3125	12.6892	1.10343	22.7678	0.769765	39.0975	20.8784	1.3197	0.730036	0	0.141696	0.290577	-0.536738
comp23072_c0_seq5	14.4567	13.8371	15.1764	14.4901	1.16107	7.64618	9.32389	10.526	9.16537	0.96215	52.6099	50.693	63.6763	55.6597	1.74554
comp23073_c0_seq2	62.0286	133.443	350.04	181.837	2.25968	33.8266	109.085	209.833	117.581	2.07034	1.28933	14.9546	10.1978	8.8139	0.945168
comp23078_c0_seq2	42.0622	65.5308	114.418	74.0038	1.86925	48.8045	123.233	104.527	92.1883	1.96468	2.11084	19.213	10.0535	10.4591	1.01949
comp2308_c0_seq1	4.24394	3.28042	2.97299	3.49911	0.543958	3.99775	2.24423	9.99184	5.41127	0.733299	49.695	29.2453	76.5074	51.8159	1.71446
comp23102_c0_seq1	8.01286	4.84169	6.19996	6.35151	0.802877	1.45759	1.42894	1.48838	1.4583	0.163848	0	0.106723	0	0.0355744	-1.44886
comp23106_c0_seq1	11.3972	4.20718	14.8424	10.1489	1.00642	73.8563	25.6634	77.0712	58.8636	1.76985	923.768	805.628	1265.58	998.325	2.99927
comp23115_c1_seq1	26.0066	15.075	0.685811	13.9225	1.14372	0	0	0.0299341	0.00997802	-2.00096	0.314007	0.124491	0.335208	0.257902	-0.588545
comp23131_c0_seq1	12.4644	14.9581	17.158	14.8602	1.17202	20.7381	40.2918	32.3008	31.1102	1.4929	71.1302	94.9228	105.765	90.6061	1.95716
comp23138_c0_seq5	6.10757	7.93567	7.4993	7.18085	0.856176	7.11999	18.331	9.25869	11.5699	1.06333	230.975	255.685	208.69	231.783	2.36508
comp23140_c0_seq2	54.4219	71.8559	140.873	89.0502	1.94963	49.1072	55.0572	121.095	75.0865	1.87556	9.93798	18.4332	14.7205	14.3639	1.15727
comp23141_c0_seq2	12.9107	9.12763	8.15127	10.0632	1.00274	7.86401	5.79102	5.30939	6.32147	0.800818	0.483518	1.13819	0.580686	0.734133	-0.134225
comp23188_c0_seq2	3.21218	4.25122	3.93127	3.79822	0.579581	14.6196	12.1028	32.831	19.8511	1.29779	1.64208	4.28172	3.91044	3.27808	0.51562
comp23193_c1_seq1	167.699	149.429	17.5977	111.575	2.04757	12.2016	41.9037	1.27675	18.4607	1.26625	3.89766	9.4093	4.0723	5.79309	0.76291
comp23215_c0_seq4	9.93284	22.0132	11.019	14.3217	1.15599	24.7653	42.7809	33.2478	33.598	1.52631	50.5545	70.2655	113.422	78.0807	1.89254
comp23225_c0_seq2	17.1809	20.7621	4.38251	14.1085	1.14948	0	0.0159955	0	0.00533183	-2.27312	0	0	0	0	NA
comp23229_c0_seq3	8.80622	9.50086	13.9265	10.7445	1.03119	2.57017	2.86658	7.15981	4.19885	0.62313	0.359359	0.369131	0.348748	0.359079	-0.444809
comp23249_c0_seq1	11.4471	21.8164	7.19364	13.4857	1.12987	4.33842	4.45839	1.74	3.51227	0.545588	1.87798	0.924956	0.154214	0.985718	-0.00624734
comp23257_c0_seq2	23.0176	31.2068	34.8198	29.6814	1.47248	47.1759	68.5398	42.865	52.8602	1.72313	147.391	176.995	114.058	146.148	2.16479
comp23275_c0_seq1	16.2815	28.0166	3.98753	16.0952	1.2067	0.0913824	0.0304592	0	0.0406138	-1.39133	0.241602	0.284363	0.0644786	0.196815	-0.705943
comp23283_c0_seq2	7.36032	11.5106	23.5971	14.156	1.15094	1.12112	2.54986	0.75004	1.47367	0.168402	0.0435894	0.164174	0.0465325	0.0847653	-1.07178
comp23329_c0_seq1	7.56755	4.55888	5.47149	5.86597	0.76834	7.25936	3.52451	6.63858	5.80748	0.763988	0.395866	0.359892	0.524601	0.426786	-0.369789
comp23334_c0_seq3	32.5488	35.1379	18.4815	28.7227	1.45823	13.4961	10.8253	14.1245	12.8153	1.10773	60.8601	74.0773	76.3967	70.4447	1.84785
comp23340_c0_seq2	8.65078	6.79041	36.187	17.2094	1.23577	6.52358	1.34272	21.1262	9.66417	0.985165	0.457016	0.336775	0.296967	0.363586	-0.439393
comp23363_c0_seq1	18.2906	6.11289	16.2074	13.537	1.13152	5.80239	1.47958	10.5526	5.94485	0.774141	72.3023	58.568	138.529	89.7997	1.95327
comp2337_c0_seq1	4.97269	1.45473	2.8617	3.09637	0.490854	1.14768	3.57037	0.610655	1.77623	0.2495	21.7458	26.0311	66.583	38.12	1.58115
comp23381_c0_seq3	16.8592	21.0992	10.0945	16.0177	1.2046	2.54547	1.40806	2.26932	2.07429	0.316869	0.0715943	0.404477	0.229285	0.235119	-0.628713
comp23400_c0_seq4	74.6618	109.609	8.91149	64.394	1.80885	0	0	0	0	NA	0	0.0983103	0	0.0327701	-1.48452
comp23403_c0_seq3	67.0218	124.024	61.0605	84.0355	1.92446	8.11736	10.3936	5.33299	7.94799	0.900258	2.68264	2.55676	2.65423	2.63121	0.420155
comp23430_c0_seq3	10.1913	27.4561	58.6494	32.0989	1.50649	6.2248	3.29438	4.52251	4.68056	0.670298	1.19348	1.0942	0.67056	0.986081	-0.00608749
comp23433_c0_seq2	28.2496	39.1175	6.18843	24.5185	1.38949	0.0536618	0.214636	0	0.0894325	-1.0485	1.48968	3.70706	3.78633	2.99436	0.476303
comp23454_c0_seq1	11.8409	14.7257	13.5488	13.3718	1.12619	6.8582	3.60503	10.9886	7.15062	0.854344	2.98549	1.72794	0.921035	1.87815	0.273731
comp23478_c0_seq1	10.6306	9.70134	8.81643	9.71611	0.987492	15.9746	20.3313	9.57305	15.293	1.18449	364.123	314.802	293.444	324.123	2.51071
comp23484_c0_seq1	13.5283	19.3024	4.05097	12.2939	1.08969	0.0962745	0.481347	0.403401	0.327007	-0.485442	0.381803	0.179752	0.271722	0.277759	-0.556332
comp23492_c0_seq3	52.6049	53.7003	57.7813	54.6955	1.73795	12.7099	6.60794	16.0863	11.8014	1.07193	6.3188	2.85149	3.45044	4.20691	0.623963
comp23517_c0_seq3	6.6754	4.34755	6.52264	5.84853	0.767047	20.2251	33.807	40.6218	31.5513	1.49902	160.306	313.496	469.399	314.4	2.49748
comp23519_c0_seq1	151.022	68.4676	215.156	144.882	2.16101	103.748	82.224	141.458	109.143	2.038	11.1897	35.9704	21.9402	23.0334	1.36236
comp23528_c0_seq1	26.8945	64.5906	34.289	41.9247	1.62247	36.18	52.2886	51.3953	46.6213	1.66858	6.81177	9.53316	10.8081	9.05101	0.956697
comp23529_c0_seq1	14.8053	23.3498	16.1776	18.1109	1.25794	13.1469	17.6233	13.9487	14.9063	1.17337	449.075	832.679	501.366	594.373	2.77406
comp23553_c0_seq4	12.5193	14.3117	13.8859	13.5723	1.13265	1.1854	1.31704	0.384347	0.96226	-0.0167074	0.718212	0.307393	0.592454	0.539353	-0.268127
comp23560_c0_seq1	75.5554	184.572	179.998	146.708	2.16646	54.3203	94.7553	60.0378	69.7045	1.84326	27.0381	43.276	26.8861	32.4001	1.51055
comp23579_c0_seq1	13.5651	15.8011	20.8121	16.7261	1.22339	19.0152	19.8014	23.2437	20.6868	1.31569	71.1764	56.7048	104.341	77.4076	1.88878
comp23585_c0_seq1	25.7878	15.1582	11.2717	17.4059	1.2407	0	0	0	0	NA	0.0905416	0	0	0.0301805	-1.52027
comp23601_c0_seq2	10.1096	18.7983	0.963005	9.95695	0.998126	51.1344	38.6534	1.60286	30.4635	1.48378	301.493	344.968	277.812	308.091	2.48868
comp23607_c0_seq1	16.7957	13.3709	4.19183	11.4528	1.05891	0	0.67032	0.112856	0.261059	-0.583262	0.290772	2.20987	0.709496	1.07005	0.0294021
comp23608_c0_seq2	12.3865	18.4405	16.4062	15.7444	1.19713	8.00233	9.74454	4.74752	7.49813	0.874953	1.73957	1.88146	1.75665	1.79256	0.253474
comp2361_c0_seq1	12.6555	32.7983	9.32274	18.2589	1.26147	7.09095	4.813	3.39564	5.09986	0.707559	2.38604	4.01193	2.00133	2.79976	0.447121
comp23621_c0_seq1	17.7144	25.3756	1.80231	14.9641	1.17505	18.1169	1.39891	0	6.50527	0.813265	392.712	227.159	99.3366	239.736	2.37973
comp23636_c0_seq4	11.6561	17.0514	50.2834	26.3303	1.42046	6.94371	13.4508	23.2651	14.5532	1.16296	0.55134	1.72579	1.62254	1.29989	0.113906
comp23638_c0_seq2	13.0038	1.64932	27.6783	14.1104	1.14954	18.4255	7.00359	38.3285	21.2526	1.32741	0.72201	0.919784	1.13347	0.925089	-0.0338167
comp23641_c0_seq1	24.9513	20.4349	13.5394	19.6419	1.29318	0.23071	0.549282	0.197286	0.325759	-0.487103	0	0.246145	0.139532	0.128559	-0.890897
comp23643_c0_seq3	13.7729	18.1321	23.7601	18.555	1.26846	13.3675	20.317	25.5636	19.7494	1.29555	2.34591	4.32176	5.60748	4.09172	0.611906
comp23651_c0_seq1	16.6119	26.5644	35.8361	26.3375	1.42057	27.6655	36.101	46.6777	36.8147	1.56602	98.0286	108.433	175.097	127.186	2.10444
comp23670_c0_seq1	9.68155	30.8735	4.59381	15.0496	1.17753	0	0	0	0	NA	0	0	0	0	NA
comp23680_c0_seq1	2642.12	5104.89	255.027	2667.35	3.42608	1.82602	1.05129	1.24209	1.37313	0.137713	1.15207	2.16957	0.585649	1.30243	0.114755
comp23700_c0_seq1	20145.2	18673.5	12174.5	16997.7	4.23039	919.355	655.132	435.243	669.91	2.82602	12.2687	10.7996	7.16713	10.0785	1.00339
comp23729_c0_seq1	28.3737	19.4457	4.09587	17.3051	1.23817	0.826012	2.50294	0.494441	1.27446	0.105327	43.4041	236.335	180.014	153.251	2.1854
comp23736_c0_seq1	13.9425	6.39093	26.5487	15.6274	1.19389	20.397	17.9509	30.8662	23.0714	1.36307	1.02289	3.04354	1.57241	1.87961	0.274069
comp23753_c0_seq1	13.7729	13.7818	4.61848	10.7244	1.03037	0.400856	0.0368584	0.0992886	0.179001	-0.747145	0	0	0.078025	0.0260083	-1.58489
comp23835_c0_seq1	42.9197	49.8858	7.47156	33.4257	1.52408	0.0874877	0.0194407	0.139651	0.082193	-1.08516	0.115652	0.0725984	0.164615	0.117622	-0.929512
comp23839_c0_seq2	10.0569	7.71206	9.38848	9.05249	0.956768	5.28844	10.1998	9.69142	8.39322	0.923929	24.4343	40.4543	36.1313	33.6733	1.52729
comp23873_c0_seq2	14.194	11.6384	18.3497	14.7274	1.16813	6.09405	0.507811	3.84324	3.4817	0.541791	90.1252	7.75469	97.0167	64.9655	1.81268
comp23881_c0_seq5	8.34799	29.7733	17.9522	18.6911	1.27164	54.6383	59.6689	29.6379	47.9817	1.68108	124.271	172.7	114.366	137.112	2.13708
comp23910_c1_seq1	79.7088	60.7766	19.086	53.1904	1.72583	364.659	186.256	111.511	220.809	2.34402	486.886	526.326	512.464	508.558	2.70634
comp23935_c0_seq2	25.3226	22.1781	0.825537	16.1087	1.20706	0	0	0	0	NA	0.0700261	0	0	0.023342	-1.63186
comp23999_c0_seq1	10.8606	16.2368	7.82478	11.6407	1.06598	13.2212	13.5578	8.33491	11.7046	1.06836	55.7194	33.7245	108.533	65.9924	1.81949
comp2403_c0_seq1	2.91143	2.64642	6.79667	4.11818	0.614705	4.02103	3.86617	2.31436	3.40052	0.531545	18.7576	13.1382	21.6609	17.8523	1.25169
comp24030_c0_seq1	16.1838	17.4587	18.0899	17.2441	1.23664	19.8861	27.5723	21.5764	23.0116	1.36195	57.8255	75.6647	117.77	83.7532	1.923
comp24031_c0_seq1	408.934	462.603	99.4496	323.662	2.51009	83.3634	272.634	22.6254	126.208	2.10109	3.02441	29.0998	0.21705	10.7804	1.03264
comp24038_c0_seq1	158.557	132.584	10.9201	100.687	2.00297	18.1953	44.3461	8.07207	23.5379	1.37177	5.7147	15.9621	7.98991	9.8889	0.995148
comp24048_c0_seq1	17505.3	8485.34	8490.57	11493.7	4.06046	1789.38	977.146	1379.95	1382.16	3.14056	23.5982	50.9827	30.6026	35.0612	1.54483
comp24065_c0_seq9	22.5641	39.3261	51.1767	37.689	1.57621	35.9032	49.4298	43.4536	42.9289	1.63275	1.48475	7.32475	2.0456	3.61837	0.558513
comp2407_c0_seq1	8.38308	4.97841	10.4929	7.95147	0.900447	77.3054	39.6897	41.0496	52.6815	1.72166	214.068	875.905	375.664	488.546	2.68891
comp24089_c0_seq1	15.1911	19.5207	8.85974	14.5238	1.16208	22.0314	39.5108	14.3974	25.3132	1.40335	62.474	110.351	65.5234	79.4495	1.90009
comp24093_c0_seq20	14.857	33.5423	0.949995	16.4498	1.21616	12.6059	3.57784	1.4675	5.88375	0.769655	0.700724	0.247424	0	0.31605	-0.500245
comp24094_c0_seq1	12.8557	12.9351	18.4751	14.7553	1.16895	24.9912	26.5641	19.9154	23.8236	1.37701	268.867	214.441	203.832	229.047	2.35992
comp24112_c0_seq1	13.0157	26.4761	35.5174	25.0031	1.39799	10.9194	18.1847	11.3127	13.4722	1.12944	0.026437	0.547645	0.112888	0.22899	-0.640184
comp24142_c0_seq2	10.3637	7.65258	9.48433	9.16687	0.962221	4.99544	0.875345	17.0698	7.64687	0.883483	63.904	112.26	111.08	95.7479	1.98113
comp24151_c0_seq2	13.0436	8.06699	34.0849	18.3985	1.26478	8.51726	2.69874	8.11956	6.44519	0.809235	3.96157	2.09414	2.11453	2.72341	0.435113
comp24164_c0_seq1	10.6707	28.479	17.8188	18.9895	1.27851	16.9867	56.1283	25.2248	32.7799	1.51561	72.0681	140.329	102.569	104.989	2.02114
comp24165_c0_seq1	9.74973	20.5154	5.25868	11.8413	1.0734	2.485	0.544928	0.450162	1.16003	0.0644697	0.0216118	0	0	0.00720393	-2.14243
comp24168_c1_seq1	16.4208	26.1982	3.47375	15.3643	1.18651	0.391821	2.52494	0.886037	1.2676	0.102981	2.47469	2.73658	3.53262	2.91463	0.464583
comp24195_c0_seq1	36.3425	37.5573	14.3753	29.425	1.46872	0.0866946	0.0577934	0.415155	0.186548	-0.72921	0.343812	0.188843	0.122342	0.218332	-0.660882
comp24195_c1_seq1	24.9743	30.2732	4.74881	19.9988	1.301	1.25917	0.167881	0.753726	0.726927	-0.138509	0	0	0	0	NA
comp24227_c0_seq1	13.2683	11.8801	29.3741	18.1742	1.25945	0.575357	0.0767102	1.0332	0.561757	-0.250452	22.6653	23.7406	9.41843	18.6081	1.2697
comp24255_c0_seq3	45.7494	56.4171	15.0811	39.0825	1.59198	0.117441	0.297502	0.590511	0.335152	-0.474759	0.388122	0.23389	0.364609	0.328874	-0.482971
comp24267_c0_seq7	33.9391	90.1969	49.1557	57.7639	1.76166	7.07478	40.305	36.7633	28.0477	1.4479	1.5166	6.80689	5.09984	4.47444	0.650739
comp24269_c0_seq2	71.7205	36.6514	85.2156	64.5292	1.80976	239.229	188.104	232.381	219.905	2.34223	1697.45	1299.17	1704.17	1566.93	3.19505
comp24273_c0_seq2	25.4818	34.4576	39.3453	33.0949	1.51976	8.42233	5.11329	2.37071	5.30211	0.724449	0.132544	0.0936021	0	0.0753821	-1.12273
comp24275_c0_seq1	351.064	479.201	286.406	372.223	2.5708	108.919	192.414	71.3621	124.232	2.09423	0.725277	9.4897	0.483905	3.56629	0.552217
comp24298_c1_seq2	6.80617	9.34747	21.0537	12.4025	1.09351	2.08819	3.84328	4.4564	3.46262	0.539405	0	0	0.192184	0.0640613	-1.1934
comp24309_c0_seq1	15.2081	24.5266	34.3276	24.6874	1.39248	25.095	30.1582	29.8485	28.3672	1.45282	115.786	179.142	175.666	156.865	2.19552
comp24320_c0_seq2	55.1199	56.9779	63.067	58.3883	1.76633	2.47506	22.3207	8.95583	11.2505	1.05117	2.35279	3.39229	1.09885	2.28131	0.358184
comp24350_c0_seq5	23.5894	23.7995	60.8304	36.0731	1.55718	10.7613	16.846	31.7059	19.7711	1.29603	5.35527	7.35271	6.64868	6.45222	0.809709
comp24386_c0_seq4	10.4953	12.7289	2.53551	8.58656	0.933819	0.164896	0.109925	0.0658033	0.113542	-0.944845	0.563118	0.581541	0.872622	0.672427	-0.172355
comp24393_c0_seq3	11.0116	30.1301	14.9925	18.7114	1.27211	5.7299	15.4429	0.883223	7.352	0.866405	1.1378	3.33648	0	1.49143	0.173602
comp24411_c0_seq2	14.6857	21.9831	32.5466	23.0718	1.36308	12.6618	18.6414	19.0034	16.7689	1.2245	1.60044	4.25928	6.3713	4.07701	0.610342
comp24415_c0_seq3	9.1043	9.95637	2.28558	7.11542	0.8522	4.18386	5.92308	1.18488	3.76394	0.575643	28.7391	32.0024	19.8235	26.855	1.42903
comp24433_c0_seq1	9.07283	5.80665	5.49734	6.79227	0.832015	18.8213	5.56323	11.0536	11.8127	1.07235	268.52	193.238	265.728	242.495	2.3847
comp2445_c0_seq1	19.4901	37.6241	13.238	23.4507	1.37016	4.57192	7.86241	6.74259	6.39231	0.805658	1.64232	2.70105	2.12723	2.15687	0.333823
comp24470_c1_seq3	14.9193	9.84911	14.9968	13.2551	1.12238	23.9364	8.89183	15.983	16.2704	1.2114	202.837	82.2886	133.335	139.487	2.14453
comp24509_c0_seq6	35.1582	69.6914	90.1397	64.9964	1.81289	37.6965	85.2637	99.5881	74.1828	1.8703	7.64446	18.5531	16.2121	14.1366	1.15034
comp24532_c0_seq1	12.0023	19.459	14.2963	15.2525	1.18334	11.5305	21.5564	13.9561	15.681	1.19537	136.636	143.799	133.132	137.856	2.13942
comp24551_c0_seq49	14.2732	29.4053	4.28483	15.9878	1.20379	291.371	80.5132	13.4541	128.446	2.10872	449.742	282.569	98.7816	277.031	2.44253
comp24553_c0_seq2	17.9282	10.2455	30.1281	19.4339	1.28856	15.3929	11.8507	38.5186	21.9207	1.34086	649.798	731.616	647.027	676.147	2.83004
comp24558_c0_seq4	27.9866	26.6999	60.8071	38.4979	1.58544	17.1609	8.95306	20.6857	15.5999	1.19312	4.20486	5.27903	3.76835	4.41742	0.645168
comp24562_c0_seq6	571.374	2456.03	245.781	1091.06	3.03785	233.849	324.377	33.4513	197.226	2.29496	93.8301	31.0742	8.9977	44.634	1.64967
comp24565_c0_seq1	28.1619	42.6443	40.4718	37.0927	1.56929	43.3966	66.1062	58.3382	55.947	1.74778	143.547	135.739	225.202	168.162	2.22573
comp24571_c0_seq140	25.6234	18.9513	24.8686	23.1478	1.36451	11.6922	41.1891	18.6566	23.846	1.37741	5.01987	6.67924	2.22578	4.64163	0.66667
comp24598_c0_seq20	21.1168	26.1716	5.10753	17.4653	1.24218	0.218492	0	0	0.0728307	-1.13769	0.361038	0.0679903	0.308332	0.245787	-0.609441
comp24619_c1_seq1	34.5339	17.4821	43.3102	31.7754	1.50209	33.2503	18.071	28.2885	26.5366	1.42385	4.45345	5.10027	6.57841	5.37738	0.730571
comp24625_c0_seq4	15.7248	14.9421	17.2861	15.9843	1.20369	22.4041	38.1873	32.6261	31.0725	1.49238	50.8916	79.4631	114.64	81.6649	1.91204
comp24640_c0_seq4	10.151	8.78161	3.75541	7.56269	0.878676	3.27252	3.71857	7.25679	4.74929	0.676629	70.7895	51.4725	74.992	65.7513	1.8179
comp24692_c0_seq2	34.0364	38.7447	47.041	39.9407	1.60142	23.9113	24.2126	31.6375	26.5871	1.42467	2.93401	7.31794	5.35939	5.20378	0.716319
comp24712_c1_seq2	16.631	35.1873	6.39353	19.4039	1.28789	4.5249	6.43508	0.36114	3.77371	0.576768	0.498466	1.68967	0.638546	0.942227	-0.0258445
comp24720_c0_seq3	195.801	33.3376	419.525	216.221	2.3349	15.2983	4.38844	67.823	29.1699	1.46493	2.98285	0.592647	12.4643	5.34661	0.728079
comp24720_c2_seq1	1428.94	1957.43	1727.59	1704.65	3.23164	200.272	343.461	147.234	230.322	2.36234	63.1345	117.638	45.8508	75.5411	1.87818
comp24721_c0_seq2	30.2327	55.3499	48.7973	44.7933	1.65121	43.0606	62.4361	44.1607	49.8858	1.69798	222.223	232.754	172.09	209.022	2.32019
comp24789_c0_seq9	50.9148	101.626	87.2768	79.9394	1.90276	87.7357	158.554	108.501	118.264	2.07285	412.78	364.512	469.248	415.513	2.61859
comp24792_c0_seq8	56.9732	123.165	43.8701	74.6693	1.87314	28.0464	19.3901	12.5253	19.9872	1.30075	10.0754	6.84751	1.80673	6.2432	0.795407
comp24792_c1_seq1	35.1727	74.1011	52.6031	53.959	1.73206	22.0688	18.6808	31.0058	23.9184	1.37873	1.33799	2.39617	0.560129	1.43143	0.155769
comp24826_c0_seq9	9648.19	150.092	13059	7619.08	3.8819	452.742	10.2453	2351.88	938.291	2.97234	11.6174	5.97146	33.4309	17.0066	1.23062
comp24834_c0_seq1	17.9131	18.9536	36.3093	24.392	1.38725	28.9097	30.5902	26.4695	28.6565	1.45722	198.093	190.409	160.17	182.891	2.26219
comp24845_c0_seq8	20.8685	33.8767	15.8603	23.5352	1.37172	0.82074	0.248696	0.848583	0.63934	-0.194268	1.92333	1.39308	1.57938	1.63193	0.212702
comp24853_c0_seq11	30.7504	25.873	11.7743	22.7992	1.35792	85.0675	60.4139	23.6839	56.3884	1.75119	262.826	79.0328	327.534	223.131	2.34856
comp24864_c0_seq1	38.0186	27.2847	26.4884	30.5973	1.48568	26.4106	11.7983	20.4337	19.5475	1.29109	3.82086	3.49539	8.293	5.20308	0.716261
comp24868_c0_seq1	84.7908	30.6297	2.91081	39.4438	1.59598	22.1335	7.03502	1.81123	10.3266	1.01396	2.43206	1.94128	0.935713	1.76968	0.247896
comp24892_c0_seq1	1703.66	6494.88	1117.85	3105.46	3.49213	90.4352	397.584	35.813	174.611	2.24207	0.498466	8.13544	0.177374	2.93709	0.467918
comp24895_c0_seq1	1211.4	684.44	286.741	727.529	2.86185	3.31238	16.513	3.44826	7.75788	0.889743	1.90379	0.17926	0.203233	0.762095	-0.117991
comp24896_c0_seq1	1291.96	221.104	624.049	712.372	2.85271	214.803	147.842	406.492	256.379	2.40888	30.9353	60.2046	15.619	35.5863	1.55128
comp24914_c0_seq1	720.984	330.702	416.925	489.537	2.68979	267.386	329.529	217.755	271.557	2.43386	3.1068	24.8308	6.86817	11.6019	1.06453
comp24916_c0_seq1	705.249	788.15	180.215	557.871	2.74653	0.174612	0.698413	0.487764	0.453596	-0.343331	1.53883	1.26784	0.164273	0.990313	-0.00422731
comp24928_c0_seq1	490.128	152.91	413.924	352.321	2.54694	49.5607	7.30857	8.45044	21.7733	1.33792	13.6987	15.0173	9.60782	12.7746	1.10635
comp24935_c0_seq1	385.206	329.224	378.105	364.178	2.56131	241.227	183.889	305.611	243.576	2.38663	71.7775	64.4773	85.7746	74.0098	1.86929
comp24942_c0_seq1	19.9597	34.9251	33.3108	29.3985	1.46833	18.4617	17.3166	8.88519	14.8878	1.17283	0.245277	2.07856	0.916432	1.08009	0.0334599
comp24944_c0_seq1	374.085	721.92	694.653	596.886	2.77589	335.042	610.993	319.011	421.682	2.62498	17.5196	103.066	16.2751	45.6203	1.65916
comp24953_c0_seq1	343.829	529.631	128.823	334.094	2.52387	20.1756	20.9529	39.9888	27.0391	1.43199	2.35329	2.31115	2.21505	2.29316	0.360435
comp24954_c0_seq1	327.655	399.159	452.428	393.081	2.59448	311.973	424.118	362.402	366.164	2.56368	87.0135	129.708	112.098	109.606	2.03984
comp24955_c0_seq1	142.549	46.1361	247.833	145.506	2.16288	153.909	24.8105	109.46	96.06	1.98254	16.0741	6.52238	20.4775	14.358	1.15709
comp24962_c0_seq1	174.458	439.932	138.606	250.999	2.39967	119.209	50.3736	28.3349	65.9727	1.81936	12.1993	3.10819	3.37066	6.22604	0.794212
comp24983_c0_seq1	263.76	357.769	62.3816	227.97	2.35788	24.1865	10.0415	13.084	15.7707	1.19785	227.075	248.798	345.07	273.648	2.43719
comp24988_c0_seq1	198.488	235.24	36.0328	156.587	2.19476	0.302636	0	0.181154	0.161264	-0.792464	0.300047	0.470871	0.213538	0.328152	-0.483925
comp24991_c0_seq1	243.386	566.529	811.775	540.563	2.73285	1.81142	7.54719	3.49007	4.28289	0.631737	0.261906	0.634137	0.87871	0.591584	-0.227983
comp24996_c0_seq1	268.172	340.023	81.9591	230.051	2.36182	2.14483	0.667245	1.79742	1.5365	0.186532	15.9722	9.29949	17.7569	14.3429	1.15664
comp24999_c0_seq1	130.946	101.119	53.3798	95.1482	1.9784	109.985	67.4145	24.2352	67.2116	1.82744	8.14977	8.26169	4.3968	6.93609	0.841114
comp25013_c0_seq1	196.175	492.288	329.784	339.416	2.53073	519.984	1428.45	723.171	890.535	2.94965	56.6742	218.378	84.7306	119.928	2.07892
comp25024_c0_seq1	221.982	227.225	56.5507	168.586	2.22682	0.101892	0.0452831	0.325288	0.157488	-0.802753	0.269389	0.253655	0.167754	0.230266	-0.637771
comp25031_c0_seq1	156.927	1503.74	316.577	659.082	2.81894	7.49642	80.2117	9.27874	32.3289	1.50959	0.335922	3.71656	2.06197	2.03815	0.309236
comp25034_c0_seq1	162.146	153.4	35.3599	116.969	2.06807	0.328121	0.054684	0.0982047	0.160337	-0.794967	0.108438	0.102105	0.11576	0.108768	-0.963501
comp25036_c0_seq1	239.928	371.095	37.5788	216.201	2.33486	194.126	61.2266	3.89838	86.4171	1.9366	13.3553	3.84534	2.82785	6.67617	0.824527
comp25037_c0_seq1	135.26	130.148	227.375	164.261	2.21553	35.5294	118.733	76.3695	76.8772	1.8858	0	1.57943	0.325575	0.635002	-0.197225
comp25043_c0_seq1	94.795	94.1458	117.888	102.276	2.00977	56.211	73.1397	63.8379	64.3962	1.80886	13.7561	24.2582	27.7995	21.9379	1.3412
comp25045_c0_seq1	145.915	189.412	44.0179	126.448	2.10191	65.3946	75.7778	31.2727	57.4817	1.75953	2.44401	10.467	1.59908	4.83671	0.68455
comp25047_c0_seq1	137.342	265.753	439.434	280.843	2.44846	67.9003	197.75	106.371	124.007	2.09345	0.759956	3.57785	2.70423	2.34734	0.370577
comp25049_c0_seq1	120.906	349.339	205.706	225.317	2.35279	52.9299	102.322	130.297	95.1831	1.97856	23.4788	30.7119	66.2917	40.1608	1.6038
comp25051_c0_seq1	136.958	168.873	36.1205	113.984	2.05684	1.43961	2.99903	0.0538583	1.4975	0.175366	17.187	26.0387	3.1743	15.4667	1.1894
comp25052_c0_seq1	112.819	114.931	39.2258	88.9918	1.94935	2.09752	29.1016	0.470832	10.5567	1.02353	0	2.69242	0.369999	1.0208	0.00894274
comp25055_c0_seq1	44.408	33.2081	27.1661	34.9274	1.54317	2.38326	2.72358	1.01899	2.04195	0.310044	0.450071	0.423784	0	0.291285	-0.535682
comp25071_c0_seq1	141.355	179.004	193.605	171.321	2.23381	57.1072	86.9618	64.7716	69.6136	1.84269	15.8817	37.6883	54.585	36.0517	1.55693
comp25072_c0_seq1	119.847	124.413	165.036	136.432	2.13492	52.884	71.0724	70.6274	64.8613	1.81199	2.36136	3.80326	3.64853	3.27105	0.514688
comp25073_c0_seq1	133.445	116.639	201.774	150.619	2.17788	76.1899	85.6774	122.995	94.954	1.97751	10.4334	27.9649	19.681	19.3598	1.2869
comp25074_c0_seq1	149.969	111.262	360.159	207.13	2.31624	58.369	38.6332	229.459	108.82	2.03671	1.27609	1.86449	3.40563	2.18207	0.338869
comp25075_c0_seq1	93.4405	67.1053	95.2985	85.2814	1.93085	88.3972	53.0032	73.5178	71.6394	1.85515	1160.43	508.912	719.733	796.358	2.90111
comp25078_c0_seq1	137.525	210.457	22.0262	123.336	2.09109	145.776	31.4855	2.33827	59.8667	1.77719	6.22009	2.65214	1.75398	3.54207	0.549257
comp25080_c0_seq1	136.979	127.491	66.6847	110.385	2.04291	36.2192	32.9016	29.5079	32.8762	1.51688	16.428	29.3203	14.9129	20.2204	1.30579
comp25087_c0_seq1	167.27	212.771	25.6591	135.233	2.13108	0	0.427636	0.127995	0.18521	-0.732335	0.282666	0.266157	0	0.182941	-0.737688
comp25093_c0_seq1	148.255	242.804	41.3887	144.149	2.15881	144.48	42.017	2.46297	62.9867	1.79925	8.9006	4.19038	2.11146	5.06748	0.704792
comp25094_c0_seq1	90.5869	119.068	84.6796	98.1114	1.99172	41.2741	27.8683	35.6851	34.9425	1.54335	3.04982	1.8666	2.89761	2.60468	0.415754
comp25104_c0_seq1	155.999	92.7059	395.38	214.695	2.33182	91.513	64.2612	213.938	123.238	2.09074	5.29193	14.6496	14.3491	11.4302	1.05805
comp25105_c0_seq1	97.6999	133.873	21.2411	84.2714	1.92568	9.6265	3.56518	4.2074	5.7997	0.763405	77.9691	102.04	134.877	104.962	2.02103
comp25119_c0_seq1	83.0103	108.416	26.8097	72.7454	1.86181	0.705771	0	0.950547	0.552106	-0.257978	0.291555	0.0549054	0.248993	0.198485	-0.702273
comp25121_c0_seq1	109.817	136.532	133.115	126.488	2.10205	69.2898	94.3453	94.1699	85.935	1.93417	9.19689	26.6424	16.0978	17.3123	1.23836
comp25122_c0_seq1	114.229	60.0076	105.956	93.3975	1.97034	28.5617	29.4546	56.5048	38.1737	1.58176	4.42192	12.491	10.7897	9.2342	0.965399
comp25126_c0_seq1	125.655	236.154	39.9076	133.906	2.1268	0	0	0	0	NA	0	0.169185	0	0.0563951	-1.24876
comp25141_c0_seq1	107.69	202.275	214.168	174.711	2.24232	84.3622	148.2	146.862	126.475	2.102	5.3105	25.3458	6.29319	12.3165	1.09049
comp25142_c0_seq1	117.363	196.371	459.55	257.761	2.41122	48.0128	70.1323	96.4043	71.5165	1.85441	2.71848	5.95469	8.73666	5.80328	0.763673
comp25149_c0_seq1	93.4475	37.1355	79.9389	70.174	1.84618	0	0.526074	0.708566	0.411547	-0.385581	0.260801	0.368352	0	0.209718	-0.678365
comp25152_c0_seq1	97.2096	123.545	74.8157	98.5235	1.99354	0	2.00021	0.673516	0.891241	-0.0500048	0	0.466842	0.264638	0.243827	-0.612918
comp25159_c0_seq1	81.6568	89.804	164.662	112.041	2.04938	14.745	41.7754	31.124	29.2148	1.4656	0.769416	3.86388	0.958261	1.86385	0.270412
comp25160_c0_seq1	106.681	165.526	30.8394	101.016	2.00439	23.7557	20.7129	6.68109	17.0499	1.23172	0.797545	0.563223	0.212849	0.524539	-0.280222
comp25164_c0_seq1	98.8448	133.307	154.718	128.956	2.11044	41.1234	60.347	54.3249	51.9318	1.71543	4.10376	23.1845	12.3854	13.2245	1.12138
comp25167_c0_seq1	112.423	215.187	40.0258	122.545	2.0883	28.6471	24.6645	9.56836	20.96	1.32139	0.830989	1.17368	0.380185	0.794952	-0.0996593
comp25175_c0_seq1	92.5858	46.5253	62.9335	67.3482	1.82833	1.68262	0	1.15108	0.944568	-0.0247668	0.0706128	0	0.226142	0.0989182	-1.00472
comp25176_c0_seq1	91.912	91.5371	13.9313	65.7934	1.81818	0	0.633964	0	0.211321	-0.675057	0	0	0	0	NA
comp25178_c0_seq1	63.2016	116.799	26.5931	68.8647	1.838	6.20173	9.89719	5.21969	7.10621	0.851638	9.39071	11.5791	10.5287	10.4995	1.02117
comp25186_c0_seq1	67.8634	193.647	21.2793	94.2633	1.97434	25.7983	12.7513	1.0569	13.2022	1.12065	7.65057	2.31985	0.553705	3.50804	0.545065
comp25194_c0_seq1	64.1615	36.8572	180.042	93.6869	1.97168	42.3115	25.7535	97.7298	55.2649	1.74245	1.97588	4.00719	2.1093	2.69746	0.430955
comp25198_c0_seq1	73.8848	285.309	480.513	279.902	2.44701	1265.15	1437.07	1911.67	1537.96	3.18695	13015.2	16128.3	15137.4	14760.3	4.1691
comp25202_c0_seq1	65.245	103.694	29.7012	66.2135	1.82095	0.149362	0.085345	0.0383169	0.0910078	-1.04092	0.112826	0.106236	0.0602219	0.0930946	-1.03108
comp25203_c0_seq1	59.9376	90.085	120.101	90.0413	1.95444	45.8841	41.1718	84.5352	57.197	1.75737	9.89061	8.15191	8.2899	8.77747	0.943369
comp25207_c0_seq1	85.2399	87.0238	94.6594	88.9744	1.94926	79.1193	119.255	107.868	102.081	2.00894	283.786	457.598	438.479	393.288	2.59471
comp25226_c0_seq1	67.3962	59.3716	3.47539	43.4144	1.63763	0.864155	0.222996	0.266979	0.451377	-0.345461	7.84905	0.693955	0.708086	3.0837	0.489072
comp25261_c0_seq1	65.9719	33.7186	61.4584	53.7163	1.73011	82.1927	52.0983	55.177	63.156	1.80041	9.66881	13.3859	16.0716	13.0421	1.11535
comp25262_c0_seq1	59.2972	58.2074	70.6085	62.7044	1.7973	88.5466	63.3528	60.4548	70.7848	1.84994	781.468	384.445	450.211	538.708	2.73135
comp25268_c0_seq1	61.7772	651.092	193.012	301.96	2.47995	0	28.9108	0.154064	9.68829	0.986247	0.170119	6.72767	0.0908025	2.32953	0.367268
comp25271_c0_seq1	66.243	26.3433	143.191	78.5923	1.89538	23.683	32.5303	97.4877	51.2337	1.70956	0.331293	3.29769	0.606277	1.41175	0.149758
comp25273_c0_seq1	45.1659	73.8934	5.45545	41.5049	1.6181	0	0	0	0	NA	0	0	0	0	NA
comp25294_c0_seq1	70.3347	79.6054	25.6572	58.5324	1.7674	7.15552	7.29312	9.02659	7.82508	0.893489	4.72954	5.2262	7.51073	5.82215	0.765084
comp25299_c0_seq1	59.6433	73.7994	15.5717	49.6715	1.69611	9.28741	9.18017	9.58505	9.35088	0.970852	7.4087	6.77668	4.74536	6.31025	0.800046
comp25300_c0_seq1	170.889	97.3991	32.0617	100.117	2.00051	2.80544	5.73526	1.11953	3.22008	0.507866	0	0.232799	0	0.0775996	-1.11014
comp25303_c0_seq1	70.2112	137.117	50.6046	85.9776	1.93439	127.727	108.653	64.2495	100.21	2.00091	604.31	796.427	773.035	724.591	2.86009
comp25320_c0_seq1	51.1967	12.319	43.3041	35.6066	1.55153	0	0	0	0	NA	0	0	0	0	NA
comp25323_c0_seq1	48.4989	28.0321	70.2019	48.911	1.68941	75.6336	44.7558	50.8577	57.0824	1.7565	7.59775	8.39817	13.8706	9.9555	0.998063
comp25340_c0_seq1	52.6793	40.842	8.41481	33.9787	1.53121	0	0	0	0	NA	0.387927	0	0	0.129309	-0.888371
comp25351_c0_seq1	38.5512	30.6004	67.6516	45.6011	1.65897	55.0014	31.9902	43.0137	43.3351	1.63684	595.651	359.919	651.67	535.747	2.72896
comp25355_c0_seq1	44.6329	132.231	79.4744	85.446	1.93169	71.2482	282.593	56.055	136.632	2.13555	3209.23	4397.09	2238.53	3281.62	3.51609
comp25363_c0_seq1	29.6465	48.805	30.3519	36.2678	1.55952	21.7739	35.8138	22.3994	26.6624	1.4259	6.94275	12.2573	5.24983	8.14997	0.911156
comp25377_c0_seq1	4.21496	3.94836	10.8283	6.33055	0.801442	2.02441	3.6568	9.69429	5.12517	0.709708	0	0	0.368621	0.122874	-0.910541
comp25383_c0_seq1	35.0417	37.9865	7.01934	26.6825	1.42623	3.69983	4.93285	2.11838	3.58369	0.55433	2.12648	5.60639	1.81605	3.18297	0.502833
comp25392_c0_seq1	19.9046	3.31701	28.1217	17.1144	1.23336	0.704884	0	0	0.234961	-0.629004	0	0.329018	0.24868	0.192566	-0.71542
comp25427_c0_seq1	28.8944	23.754	1.72624	18.1249	1.25828	0.639052	0	0.573793	0.404282	-0.393316	0.140797	0.0662867	0.0751516	0.0940783	-1.02651
comp25431_c0_seq1	34.721	5.77188	15.226	18.573	1.26888	0	0	0	0	NA	0	0	0	0	NA
comp25440_c0_seq1	29.4718	53.7568	8.653	30.6272	1.48611	2.0091	10.5929	0.655977	4.41932	0.645356	0	1.13671	0	0.378904	-0.421471
comp25444_c0_seq1	39.9672	65.2122	62.482	55.8871	1.74731	19.032	26.4188	31.1812	25.544	1.40729	1.57525	3.136	2.69057	2.46728	0.392218
comp25451_c0_seq1	37.4465	25.3954	28.2897	30.3772	1.48255	29.3952	13.7514	12.9652	18.7039	1.27193	6.47639	3.42351	6.18592	5.36194	0.729322
comp25462_c0_seq1	26.5352	32.31	21.8341	26.8931	1.42964	0	0.33516	0	0.11172	-0.951869	0	0	0	0	NA
comp25465_c0_seq1	30.0363	27.3531	36.1253	31.1716	1.49376	4.84235	9.26766	11.5008	8.53693	0.931302	3.20062	3.49976	5.51084	4.07041	0.609638
comp25468_c0_seq1	2.94718	7.50096	13.6626	8.03692	0.90509	4.05474	2.77607	7.21574	4.68218	0.670448	0	0	0.309296	0.103099	-0.986747
comp25469_c0_seq1	26.083	26.8021	5.59852	19.4945	1.28991	1.71289	1.23445	0.969893	1.30575	0.115858	1.59114	1.26772	1.33926	1.39937	0.145934
comp25485_c0_seq1	29.4392	67.3014	11.1113	35.9506	1.55571	125.741	284.016	81.1817	163.646	2.21391	938.543	2211.67	1460.15	1536.79	3.18661
comp25487_c0_seq1	31.3102	25.1479	6.65999	21.0394	1.32303	1.45177	1.35303	0.101244	0.968682	-0.0138186	0.726662	0.192985	0.0795617	0.33307	-0.477465
comp25490_c0_seq1	19.6739	52.457	27.7958	33.3089	1.52256	38.2032	75.8605	28.9151	47.6596	1.67815	599.421	547.935	1244.07	797.141	2.90154
comp25498_c0_seq1	24.8548	38.7408	6.31627	23.3039	1.36743	0	0.105541	0.189537	0.0983596	-1.00718	0.104644	0	0.11171	0.0721179	-1.14196
comp25523_c0_seq1	18.2658	16.0798	1.13376	11.8265	1.07286	0	0	0	0	NA	0.300534	0	0	0.100178	-0.999228
comp25527_c0_seq1	21.0383	37.0509	9.59608	22.5618	1.35337	0	0	0	0	NA	0	0	0	0	NA
comp25529_c0_seq1	23.5177	15.7995	54.1248	31.1473	1.49342	0.799017	0.7102	1.48799	0.999068	-0.000404782	0	0	0.125284	0.0417615	-1.37922
comp25532_c0_seq1	24.8984	18.2706	74.8963	39.3551	1.595	14.2892	35.6416	47.8986	32.6098	1.51335	0.944461	4.00185	6.30145	3.74925	0.573945
comp25544_c0_seq1	18.5315	25.297	7.2121	17.0135	1.23079	2.09841	2.44486	2.30847	2.28391	0.35868	2.17417	2.8237	3.1213	2.70639	0.432391
comp25548_c0_seq1	25.9245	21.5412	0.59349	16.0197	1.20466	0	0	0	0	NA	0	0	0	0	NA
comp25551_c0_seq1	19.1142	13.582	5.5775	12.7579	1.10578	5.41173	1.34685	0.518303	2.42563	0.384824	2.28925	0	0	0.763083	-0.117428
comp2557_c0_seq2	21.4902	6.55821	10.07	12.7062	1.10401	23.5128	9.50426	21.5763	18.1978	1.26002	274.306	61.1812	181.643	172.377	2.23648
comp25583_c0_seq1	13.9219	6.35002	2.63711	7.63634	0.882885	2.8945	0	0	0.964833	-0.0155477	16.9241	12.8871	36.9191	22.2434	1.3472
comp25585_c0_seq1	20.9892	22.1983	24.5229	22.5701	1.35353	4.79878	8.29635	8.5859	7.22701	0.858958	2.23073	4.52907	3.86969	3.54316	0.549391
comp25601_c0_seq1	17.9133	22.8154	25.0197	21.9161	1.34076	19.7257	27.0758	21.8932	22.8983	1.3598	89.5909	109.38	107.77	102.247	2.00965
comp25607_c0_seq1	13.6901	18.8042	9.26793	13.9208	1.14366	0	0	0	0	NA	0.427256	0	0	0.142419	-0.846433
comp25612_c0_seq1	13.9192	15.7851	25.0207	18.2417	1.26107	6.65447	2.25325	2.14971	3.68581	0.566532	2.23409	1.97213	0	1.40207	0.14677
comp25631_c0_seq1	19.8187	18.7463	22.0714	20.2122	1.30561	22.1081	16.9402	7.80834	15.6189	1.19365	2.01553	6.11519	3.1079	3.74621	0.573592
comp25632_c0_seq1	10.121	24.1982	25.1659	19.8284	1.29729	3.42127	8.43868	1.63834	4.49943	0.653157	0	0.425851	0.965607	0.463819	-0.333651
comp25635_c0_seq1	19.6215	33.8835	17.3708	23.6253	1.37338	38.5983	56.4196	20.6813	38.5664	1.58621	1980.42	1490.19	1851.82	1774.14	3.24899
comp25639_c0_seq1	10.8877	20.8307	2.78474	11.501	1.06074	0	0	0	0	NA	0.442904	0	0.472809	0.305238	-0.515362
comp25652_c0_seq1	13.5931	32.4531	31.3404	25.7955	1.41154	46.0715	64.4072	50.3362	53.6049	1.7292	147.705	146.761	179.139	157.868	2.1983
comp25697_c0_seq1	3.91404	3.16246	6.73951	4.60534	0.663261	0	0	0	0	NA	0	0	0	0	NA
comp2571_c0_seq1	2.47604	20.0259	3.265	8.58898	0.933941	1.6777	6.43766	2.44939	3.52158	0.546738	0.108185	0.254666	0	0.12095	-0.917393
comp25721_c0_seq1	10.206	11.0662	7.23614	9.50278	0.97785	0	0.86583	0.485909	0.45058	-0.346228	0.107309	0	0	0.0357695	-1.44649
comp25722_c0_seq1	10.7005	47.6984	1.34524	19.9147	1.29917	7.68798	1.07896	0.968827	3.24526	0.511249	0.356595	0	0.380672	0.245756	-0.609497
comp25723_c0_seq1	10.6435	27.0892	8.36934	15.3673	1.1866	1.40272	2.13736	4.91795	2.81934	0.450148	1.0596	1.74599	1.69671	1.50077	0.176313
comp25735_c0_seq1	8.02287	29.3093	8.34939	15.2272	1.18262	8.52347	14.1239	6.26822	9.63852	0.98401	60.683	81.5402	91.2423	77.8218	1.8911
comp25742_c0_seq1	10.4402	5.46195	9.84113	8.58109	0.933542	14.8812	19.1505	21.3785	18.4701	1.26647	1.7106	5.79849	1.46088	2.98999	0.47567
comp25744_c0_seq1	8.01801	11.4164	8.10985	9.18143	0.96291	6.37979	7.67202	4.44286	6.16489	0.789925	34.8369	33.0617	27.4799	31.7928	1.50233
comp25754_c0_seq1	8.93844	11.6843	2.53697	7.71989	0.887611	0.271319	0	0	0.0904397	-1.04364	0.089666	0	0	0.0298887	-1.52449
comp25761_c0_seq1	8.45375	10.6593	9.49194	9.53498	0.97932	2.3071	6.76715	7.66457	5.57961	0.746604	0.457473	0.861509	0.651149	0.65671	-0.182626
comp25801_c0_seq1	7.10411	1.13552	8.78227	5.67397	0.753887	51.6832	19.8045	58.3905	43.2927	1.63641	678.659	539.237	908.817	708.904	2.85059
comp25858_c0_seq1	7.9859	8.60325	17.1591	11.2494	1.05113	0.75415	0.565583	1.86213	1.06062	0.0255599	0.872315	0.352014	0.598637	0.607655	-0.216343
comp25866_c0_seq1	5.90687	30.832	4.73406	13.8243	1.14064	0.744543	0.198534	0	0.314359	-0.502574	0.196846	0.370699	0.210137	0.259227	-0.586319
comp25871_c0_seq1	6.15063	12.808	1.55527	6.83795	0.834926	3.32661	8.31608	1.49345	4.37871	0.641346	32.0653	38.1289	35.2084	35.1342	1.54573
comp2589_c0_seq1	8.92737	3.49559	22.7092	11.7107	1.06858	0.851165	4.53931	10.5975	5.32933	0.726673	0	1.05946	0.72069	0.593383	-0.226665
comp25906_c0_seq1	4.92982	21.6391	18.6805	15.0832	1.17849	18.331	7.43827	12.2131	12.6608	1.10246	1.89643	1.19045	0.449885	1.17892	0.0714853
comp25908_c0_seq1	6.40182	6.22596	4.41547	5.68108	0.754431	0.928953	0.464452	0.27803	0.557145	-0.254032	0	0	0	0	NA
comp25932_c0_seq1	5.25827	9.49761	4.71803	6.49131	0.812332	0	0	0	0	NA	0	0	0	0	NA
comp2596_c0_seq1	2.54266	1.76493	1.07158	1.79306	0.253594	2.75043	1.37514	2.88115	2.33557	0.368394	6.59001	13.908	20.2559	13.5846	1.13305
comp25971_c0_seq1	5.30966	6.75689	2.81311	4.95989	0.695472	1.03418	2.75766	2.25107	2.0143	0.304125	12.4282	40.7242	32.9031	28.6852	1.45766
comp26029_c0_seq1	4.78763	5.50835	0.912109	3.73603	0.57241	27.8008	32.3837	21.1956	27.1267	1.4334	118.504	157.054	169.523	148.361	2.17132
comp26033_c0_seq1	5.33594	11.5804	5.17742	7.36459	0.867149	86.5625	178.653	90.0414	118.419	2.07342	296.626	690.298	786.458	591.127	2.77168
comp26036_c0_seq1	6.29866	21.2301	22.9651	16.8313	1.22612	2.27879	5.57007	4.54684	4.1319	0.61615	0.167355	0.787902	0.178655	0.377971	-0.422542
comp26091_c0_seq1	4.46322	16.1337	7.28674	9.29457	0.968229	9.30817	22.0306	16.3265	15.8884	1.20108	335.852	391.411	334.396	353.886	2.54886
comp26106_c0_seq1	5.088	4.97173	15.8371	8.63227	0.936125	3.10814	2.92781	8.45313	4.82969	0.68392	0.133981	0.756932	1.33492	0.741944	-0.129629
comp26136_c0_seq1	4.41246	9.47133	6.16128	6.68169	0.824886	0.474426	1.05422	0.662633	0.730428	-0.136423	0.104526	0.787369	0	0.297298	-0.526807
comp26180_c0_seq1	5.05578	5.19654	4.59741	4.94991	0.694597	9.39966	8.96536	6.75183	8.37228	0.922844	33.4537	22.7699	27.6517	27.9584	1.44651
comp2619_c0_seq1	3.36287	9.12953	0	4.16413	0.619524	14.5051	7.48374	0.133067	7.37398	0.867702	399.143	82.6648	104.857	195.555	2.29127
comp26218_c0_seq1	4.85086	7.2258	5.12512	5.73393	0.758452	0.0838947	0	0.401747	0.16188	-0.790806	0	0	0.118391	0.0394636	-1.4038
comp26222_c0_seq1	4.19872	2.92275	1.59709	2.90619	0.463323	3.763	4.59009	0	2.78436	0.444726	30.9049	21.0276	28.5852	26.8392	1.42877
comp26239_c0_seq1	5.99776	3.68468	0	3.22748	0.508864	0.615228	0.615195	0	0.410141	-0.387067	14.4358	5.74339	13.24	11.1398	1.04688
comp26338_c0_seq1	5.2589	5.50256	11.7834	7.51495	0.875926	5.67084	9.99407	16.8554	10.8401	1.03503	0	0.892467	1.83968	0.910715	-0.0406174
comp26354_c0_seq1	5.07821	6.68217	1.15307	4.30448	0.633921	3.9307	5.24065	1.84539	3.67224	0.564932	52.1647	23.5037	16.097	30.5885	1.48556
comp26368_c0_seq1	6.77362	20.0025	24.7588	17.1783	1.23498	0.193746	4.64965	5.33479	3.39273	0.530549	0.128059	0	0.273411	0.133823	-0.873469
comp26392_c0_seq1	4.27242	0.268491	4.5481	3.02967	0.481395	6.11924	9.88441	43.9548	19.9862	1.30073	27.2232	119.964	381.617	176.268	2.24617
comp26405_c0_seq1	4.17016	1.63286	0	1.93434	0.286533	0.238558	0	0	0.0795192	-1.09953	11.6682	12.4714	17.0008	13.7134	1.13715
comp26412_c0_seq1	4.36619	9.38391	4.85783	6.20264	0.792577	0.34635	2.07799	0.777454	1.06727	0.0282726	0.286156	0.107777	0.122191	0.172041	-0.764367
comp26432_c0_seq1	4.1651	8.45534	10.4819	7.70077	0.886534	7.41184	7.37458	19.2034	11.3299	1.05423	34.3658	35.388	45.2723	38.342	1.58368
comp26497_c0_seq1	4.23546	10.1809	6.67587	7.03076	0.847002	24.7786	78.9513	46.8847	50.2048	1.70075	181.404	343.187	272.18	265.59	2.42421
comp26521_c0_seq1	4.67949	1.22153	1.1681	2.35637	0.372244	10.5739	12.1348	4.80716	9.17198	0.962463	23.8864	36.1527	14.7329	24.924	1.39662
comp26524_c0_seq1	4.15078	7.69801	13.6934	8.51407	0.930137	5.09688	35.2695	13.4069	17.9244	1.25345	41.3752	88.0591	107.434	78.956	1.89738
comp26532_c0_seq1	5.54763	10.3935	18.6455	11.5289	1.06179	16.3307	3.43786	2.46956	7.4127	0.869976	0	0	0	0	NA
comp2655_c0_seq1	2.874	3.97342	1.38168	2.74303	0.438231	6.1745	16.57	10.4246	11.0564	1.04361	38.4044	19.7064	24.5761	27.5623	1.44032
comp26553_c0_seq1	5.45422	18.2161	11.9703	11.8802	1.07482	1.33495	1.57447	1.22936	1.37959	0.13975	0.271492	0.127818	0.434735	0.278015	-0.555932
comp26575_c0_seq1	3.84334	36.7445	56.7406	32.4428	1.51112	27.8125	75.9217	164.245	89.3264	1.95098	0.290641	6.43116	6.20531	4.30904	0.63438
comp2665_c0_seq1	3.80895	14.4768	3.03712	7.10763	0.851725	0	0	0	0	NA	0	0	0	0	NA
comp26650_c0_seq1	4.44935	4.3039	0.346988	3.03341	0.481932	0.0618483	0.20615	0	0.0893328	-1.04899	9.07524	10.6238	7.33146	9.01015	0.954732
comp26659_c0_seq1	4.04629	7.39368	2.30867	4.58288	0.661139	1.38883	9.25839	4.84947	5.16556	0.713117	66.3996	68.4279	51.6106	62.146	1.79341
comp26675_c0_seq1	4.47215	3.57089	4.81717	4.28674	0.632127	11.5426	15.6502	11.1836	12.7921	1.10694	29.7411	24.6557	33.4057	29.2675	1.46639
comp26680_c0_seq1	4.93715	8.03521	3.92363	5.632	0.750662	0	0.0999035	0	0.0333012	-1.47754	0.396216	0	0.422969	0.273062	-0.563739
comp26698_c0_seq1	3.58921	4.72501	1.14752	3.15391	0.49885	3.86576	6.01309	1.87324	3.91736	0.592994	28.7148	29.0998	20.7821	26.1989	1.41828
comp26730_c0_seq1	3.6273	6.66752	4.20389	4.8329	0.684208	5.61987	14.9855	5.29267	8.63269	0.936146	28.6266	36.8412	28.2332	31.2336	1.49462
comp26736_c0_seq1	4.59139	5.10591	7.88118	5.8595	0.76786	2.03025	3.87573	2.43057	2.77885	0.443865	0.121993	0.344603	0.325575	0.264057	-0.578302
comp2674_c0_seq2	2.17638	1.53866	0	1.23834	0.0928416	2.56266	1.07896	0	1.21387	0.0841731	183.468	169.73	222.693	191.964	2.28322
comp26754_c0_seq1	2.9336	2.39662	3.82806	3.05276	0.484692	29.5735	17.0213	25.828	24.1409	1.38275	27.2376	26.2502	68.4157	40.6345	1.60889
comp26767_c0_seq1	3.54432	20.3948	5.14358	9.69422	0.986513	0	0	0	0	NA	0	0.570585	0.323447	0.298011	-0.525768
comp26775_c0_seq1	3.91831	7.10692	3.00656	4.67727	0.669992	8.33995	2.81333	4.33057	5.16128	0.712758	86.0731	39.1472	24.8146	50.0116	1.69907
comp26793_c0_seq1	4.10042	2.94352	9.212	5.41865	0.733891	8.44446	9.69498	7.44172	8.52705	0.930799	45.117	27.4453	42.0394	38.2006	1.58207
comp26800_c0_seq1	9.25871	2.5574	2.79491	4.87034	0.68756	19.8558	8.11271	8.43484	12.1345	1.08402	92.2912	36.8731	115.696	81.6203	1.9118
comp26838_c0_seq1	96.2188	61.0604	154.349	103.876	2.01652	4.25927	0.378582	1.52973	2.05586	0.312993	0	0	0	0	NA
comp26854_c0_seq1	4.84626	9.85444	4.63594	6.44554	0.809259	2.86036	3.12716	2.6025	2.86334	0.456873	0.151247	0	0	0.0504158	-1.29743
comp2686_c0_seq1	22.1206	35.0615	11.094	22.7587	1.35715	1.17805	2.52426	0.73035	1.47755	0.169543	0.834264	0.654616	0.207805	0.565562	-0.24752
comp26878_c0_seq1	2.86221	1.51764	6.56802	3.64929	0.562208	20.2745	12.6288	20.5772	17.8268	1.25107	122.822	327.473	176.472	208.922	2.31999
comp26907_c0_seq1	4.69013	3.11868	1.17528	2.9947	0.476353	0.377075	0	0	0.125692	-0.900693	20.5617	28.7478	23.5464	24.2853	1.38534
comp26941_c0_seq1	3.38028	3.01114	14.9914	7.12759	0.852943	2.30435	0.67032	4.86536	2.61334	0.417196	0.11077	0	0	0.0369234	-1.4327
comp26967_c0_seq1	4.24617	0.75839	5.18015	3.3949	0.530827	0	0	0.198969	0.0663231	-1.17834	5.05317	6.61987	10.7887	7.48725	0.874322
comp27009_c0_seq1	4.42678	9.14402	36.2255	16.5988	1.22008	3.43523	6.29759	2.74172	4.15818	0.618903	0	0.712649	0	0.23755	-0.624245
comp27085_c0_seq1	2.51972	4.27535	2.44745	3.08084	0.48867	5.71082	9.9934	5.66176	7.12199	0.852602	23.0017	39.9845	60.8203	41.2689	1.61562
comp27102_c0_seq1	2.55983	5.14351	0.124916	2.60942	0.416544	9.21787	10.954	4.0783	8.08339	0.907593	27.2846	48.3889	49.7701	41.8145	1.62133
comp27112_c0_seq1	4.36422	4.60555	8.09272	5.6875	0.754921	1.50404	1.58312	5.49658	2.86125	0.456556	0	0.197064	0	0.0656881	-1.18251
comp27124_c0_seq1	3.72976	13.7871	6.1752	7.89734	0.897481	0.49531	1.58491	1.89751	1.32591	0.122515	0	0	0	0	NA
comp27142_c0_seq1	3.89709	3.85724	4.09503	3.94979	0.596574	10.047	6.69766	14.1098	10.2848	1.0122	21.71	16.7144	22.2216	20.2153	1.30568
comp27172_c0_seq1	3.82337	4.81142	4.90378	4.51286	0.654451	0	0	0	0	NA	0	0	0	0	NA
comp27179_c0_seq1	3.94785	5.0239	23.3853	10.7857	1.03285	1.46796	8.48111	7.2249	5.72466	0.757749	0	2.03022	0.460347	0.83019	-0.0808226
comp27184_c0_seq1	3.27866	84.1825	3.57631	30.3458	1.4821	0	4.78066	1.1161	1.96559	0.293492	0	1.78527	0	0.595089	-0.225418
comp27204_c0_seq1	4.77836	6.82754	0.699527	4.10181	0.612975	5.33033	3.98975	7.05306	5.45771	0.737011	53.5272	28.867	13.3286	31.9076	1.50389
comp27223_c0_seq1	4.76847	2.39731	5.97676	4.38085	0.641558	0.722374	0	0.314476	0.345617	-0.461405	0	0.163482	0.370692	0.178058	-0.749438
comp27228_c0_seq1	4.21862	8.74863	0	4.32242	0.635727	16.1745	15.8948	0.166928	10.7454	1.03122	291.323	66.9933	74.6738	144.33	2.15936
comp27288_c0_seq1	3.64002	3.50922	0	2.38308	0.377139	0.492182	0.656208	0	0.382797	-0.417032	10.7354	23.7393	19.9686	18.1478	1.25882
comp27345_c0_seq1	2.84065	10.7243	8.69141	7.41877	0.870332	1.90128	12.1112	17.7035	10.572	1.02416	113.101	374.441	181.404	222.982	2.34827
comp27354_c0_seq1	3.24506	5.07592	2.06849	3.46316	0.539472	3.16743	0.804384	2.34741	2.10641	0.323542	18.9417	50.6901	5.95977	25.1972	1.40135
comp27399_c0_seq1	3.6205	1.57323	5.32178	3.50517	0.544709	8.07746	6.04136	10.928	8.34895	0.921632	42.7112	16.0213	49.302	36.0115	1.55644
comp27402_c0_seq1	3.35026	7.24781	0	3.53269	0.548106	0.498302	0.664367	0	0.387556	-0.411665	12.351	37.0597	39.8184	29.743	1.47339
comp27446_c0_seq1	3.70224	11.5717	2.34862	5.87419	0.768948	0.289818	7.53487	3.46963	3.76477	0.575739	45.7826	38.7798	42.9436	42.502	1.62841
comp27472_c0_seq1	4.74514	16.2285	10.4489	10.4742	1.02012	0.66166	1.02919	5.1488	2.27988	0.357913	0	0	1.24496	0.414988	-0.381964
comp2749_c0_seq1	2.43694	2.73937	2.4854	2.5539	0.407204	5.30097	9.36305	7.05133	7.23845	0.859646	15.0931	35.5289	34.3342	28.3187	1.45207
comp27508_c0_seq1	1.94676	8.25793	9.22541	6.4767	0.811354	13.1907	22.0906	31.198	22.1598	1.34557	35.5122	114.931	55.6165	68.6866	1.83687
comp27522_c0_seq1	4.2171	9.32368	8.6493	7.39669	0.869038	9.12338	10.5167	6.25756	8.63253	0.936138	26.3822	42.94	68.5313	45.9512	1.6623
comp27602_c0_seq1	3.2482	1.52038	0.519245	1.76261	0.246156	0	0.777396	0	0.259132	-0.586479	16.627	27.6829	12.3425	18.8841	1.2761
comp27607_c0_seq1	3.53661	3.50045	5.10072	4.04593	0.607018	5.69855	8.1821	7.69679	7.19248	0.856879	15.6456	21.4611	27.8366	21.6478	1.33541
comp27616_c0_seq1	2.874	1.44488	1.48038	1.93308	0.286251	8.07434	12.3483	0.379075	6.93392	0.840979	14.6502	13.3018	25.8049	17.919	1.25331
comp27622_c0_seq1	3.4822	28.0651	49.1014	26.8829	1.42948	4.53186	19.8528	13.9511	12.7786	1.10648	1.42638	4.02921	0.304538	1.92004	0.283311
comp27719_c0_seq1	11.7339	3.81444	11.896	9.14811	0.961332	23.5689	19.1369	96.9503	46.552	1.66794	94.9786	440.66	889.276	474.971	2.67667
comp27757_c0_seq1	2.53774	2.05283	1.58685	2.05914	0.313686	2.94062	3.27694	3.73061	3.31606	0.520622	8.4708	15.2965	25.2082	16.3252	1.21286
comp27775_c0_seq1	3.49793	8.50322	6.54871	6.18329	0.79122	1.10056	6.53634	2.33569	3.3242	0.521687	0	0.373607	0.141191	0.171599	-0.765484
comp27808_c0_seq1	4.37866	0.285751	2.8106	2.49167	0.396491	6.51262	4.5085	27.4386	12.8199	1.10788	15.5628	16.2128	41.534	24.4365	1.38804
comp27880_c0_seq1	4.05342	2.40718	3.50766	3.32275	0.521498	13.565	12.0571	8.17997	11.2674	1.05182	11.9546	19.6361	25.8072	19.1326	1.28177
comp27902_c0_seq1	2.05916	0.873474	4.0093	2.31398	0.364359	6.27855	1.02085	19.6163	8.97189	0.952884	104.051	97.5925	226.259	142.634	2.15422
comp27977_c0_seq1	3.84225	2.88926	4.85783	3.86311	0.586937	3.8315	5.28157	5.36443	4.82583	0.683572	16.3967	33.7073	24.927	25.0103	1.39812
comp28073_c0_seq1	3.00237	0.749159	0.163747	1.30509	0.115641	2.8895	2.45156	1.57238	2.30448	0.362573	10.591	13.0786	15.1984	12.956	1.11247
comp28092_c0_seq1	2.87724	6.10247	0	2.99324	0.476141	8.67784	12.8378	10.9581	10.8246	1.03441	13.6715	25.3021	26.1696	21.7144	1.33675
comp28107_c0_seq1	2.66197	2.09704	1.41034	2.05645	0.313118	1.48473	4.33613	0.677137	2.166	0.335659	20.4682	12.7605	14.1678	15.7988	1.19863
comp28222_c0_seq1	3.32502	38.9793	3.08285	15.1291	1.17981	6.63144	6.59363	5.65149	6.29219	0.798802	0.297162	0	0	0.0990541	-1.00413
comp28223_c0_seq1	3.15769	8.57252	5.85542	5.86188	0.768037	0	0	0	0	NA	0	0	0	0	NA
comp28257_c0_seq1	3.14366	8.70286	6.74982	6.19878	0.792306	15.3807	20.9987	5.15575	13.845	1.14129	0.975943	0.306314	0	0.427419	-0.369146
comp28270_c0_seq1	2.28504	5.46325	11.9413	6.56318	0.817115	1.23588	3.50146	4.06879	2.93538	0.467664	116.812	83.8383	73.25	91.3002	1.96047
comp283_c0_seq1	1.87868	1.43445	1.56767	1.62693	0.211369	5.02967	9.31371	7.19222	7.17854	0.856036	6.27947	18.086	17.7445	14.0366	1.14726
comp28309_c0_seq1	2.66685	4.01079	1.96686	2.8815	0.459619	2.74955	6.97116	4.31697	4.67922	0.670174	34.7382	72.2073	47.8971	51.6142	1.71277
comp28311_c0_seq1	2.66197	7.58161	2.82067	4.35475	0.638963	3.53508	7.91816	3.2164	4.88988	0.689298	188.233	170.903	182.385	180.507	2.25649
comp28409_c0_seq1	3.01446	0.913358	2.196	2.04128	0.309902	2.56204	2.98889	5.36763	3.63952	0.561044	11.0072	22.7218	12.2024	15.3105	1.18499
comp28485_c0_seq1	35.8453	6.99276	24.3484	22.3955	1.35016	29.7935	18.2458	27.8177	25.2857	1.40287	3.01511	1.4195	0.603504	1.67937	0.225147
comp28493_c0_seq1	2.93919	0	0	0.97973	-0.00889349	0	0	0	0	NA	43.5934	33.4767	43.1841	40.0847	1.60298
comp28539_c0_seq1	3.09602	3.63683	1.87689	2.86991	0.457869	10.0068	18.6547	14.6303	14.4306	1.15928	62.8633	126.761	157.96	115.861	2.06394
comp28546_c0_seq1	2.89072	21.6119	26.1318	16.8781	1.22732	14.914	44.9635	87.9863	49.2879	1.69274	1.06568	2.67585	6.44663	3.39605	0.530975
comp28548_c0_seq1	2.85332	1.78367	0.556948	1.73131	0.238375	0	0.446702	0	0.148901	-0.827103	14.6158	22.937	1.26082	12.9379	1.11186
comp28583_c0_seq1	2.78405	1.18096	5.64655	3.20385	0.505673	4.78788	5.86592	17.6605	9.43811	0.974885	0	0.483208	0.913051	0.46542	-0.332155
comp28589_c0_seq1	3.49295	48.1543	1.01205	17.5531	1.24435	0.162352	6.16904	0	2.11046	0.324378	0	0	0	0	NA
comp28603_c0_seq1	2.77381	1.97672	4.21774	2.98942	0.475588	29.7046	22.9924	20.7443	24.4804	1.38882	23.8876	32.2495	62.878	39.6717	1.59848
comp28659_c0_seq1	2.76778	3.91354	3.70673	3.46269	0.539413	3.5068	4.06564	6.02358	4.532	0.65629	10.0777	20.4964	29.9076	20.1606	1.3045
comp28755_c0_seq1	3.25206	4.13846	2.82675	3.40576	0.532214	2.56964	13.9055	15.0196	10.4983	1.02112	23.7781	37.2528	39.8885	33.6398	1.52685
comp2876_c0_seq1	2.69456	0.326572	0	1.00704	0.00304882	5.58225	10.6868	10.2814	8.85017	0.946951	17.9753	63.0695	113.922	64.9889	1.81284
comp28870_c0_seq1	3.14366	1.3335	1.63952	2.03889	0.309394	0.876699	0.779247	0.174927	0.610291	-0.214463	16.6114	8.18433	5.56733	10.121	1.00522
comp28892_c0_seq1	2.72887	6.01929	0.607228	3.11846	0.49394	2.84116	5.19498	3.30418	3.78011	0.577504	42.6015	34.0509	43.0723	39.9082	1.60106
comp28915_c0_seq1	2.74355	25.8942	7.94917	12.1956	1.0862	0	0	0	0	NA	0	0.317453	0	0.105818	-0.975442
comp2897_c0_seq1	2.13647	0.517865	0.56596	1.07343	0.0307739	0	1.5131	0	0.504367	-0.297253	30.0047	39.4119	14.7341	28.0503	1.44794
comp28974_c0_seq1	2.41344	3.30751	10.4998	5.40691	0.732949	23.3326	20.0641	56.8582	33.4183	1.52398	36.8668	42.4468	27.861	35.7249	1.55297
comp29005_c0_seq1	2.7908	3.75558	5.35352	3.96663	0.598422	0.500971	5.91592	2.48468	2.96719	0.472345	13.6234	47.0349	64.5355	41.7313	1.62046
comp29016_c0_seq1	2.3896	0.270305	0	0.886636	-0.0522546	1.18473	0.315911	0	0.500213	-0.300845	22.7088	10.3226	17.889	16.9735	1.22977
comp29130_c0_seq1	3.35861	2.16552	6.10342	3.87585	0.588367	6.29425	11.3224	7.65493	8.42386	0.925511	25.3578	32.0844	36.6573	31.3665	1.49647
comp29136_c0_seq1	2.68361	5.52916	5.68721	4.63333	0.665893	7.27019	9.31296	4.94916	7.17744	0.855969	20.352	27.8578	23.5367	23.9155	1.37868
comp29172_c0_seq1	2.54017	5.36797	4.62469	4.17761	0.620928	2.47296	6.31946	6.20897	5.00046	0.69901	10.1251	26.0787	45.5613	27.255	1.43545
comp29193_c0_seq1	2.31909	12.8978	4.06146	6.42612	0.807949	3.64094	10.3474	8.14415	7.37749	0.867909	45.344	102.088	87.2113	78.2144	1.89329
comp29213_c0_seq1	2.66527	5.04412	10.0747	5.92803	0.772911	0.457408	2.43938	8.57903	3.82528	0.582663	0.201553	0.189782	0	0.130445	-0.884572
comp29222_c0_seq1	2.99888	0.526383	0	1.17509	0.0700706	4.22969	0.615195	1.28894	2.04461	0.31061	31.5148	16.943	13.8912	20.783	1.31771
comp29227_c0_seq1	2.95874	1.72571	3.08615	2.5902	0.413333	0.275043	0.183352	0.493912	0.317436	-0.498344	5.99918	13.0093	6.40425	8.47092	0.927931
comp29284_c0_seq1	2.46025	2.43509	0.760355	1.88523	0.275365	0	3.04923	0	1.01641	0.00706878	17.3336	22.584	13.9856	17.9677	1.25449
comp29331_c0_seq1	2.73098	0.926759	0	1.21924	0.0860909	12.0504	6.67926	12.1571	10.2956	1.01265	183.818	42.6386	39.9338	88.7969	1.9484
comp29422_c0_seq1	2.51716	1.2813	1.71148	1.83665	0.264026	3.36952	0.998324	5.52795	3.2986	0.518329	11.7131	11.6503	19.1962	14.1865	1.15188
comp29509_c0_seq1	3.46444	2.28601	9.99324	5.2479	0.719985	0.429404	0.763344	4.11257	1.76844	0.24759	12.8665	20.4887	13.5333	15.6295	1.19394
comp29523_c0_seq1	2.58974	3.84488	2.80131	3.07864	0.488359	4.33334	16.1556	12.5851	11.0247	1.04237	13.154	34.9598	47.5622	31.892	1.50368
comp29648_c0_seq1	3.14366	1.524	0.416385	1.69468	0.229088	0	0	0	0	NA	20.5297	22.4485	56.7926	33.2569	1.52188
comp29677_c0_seq1	2.79023	7.1804	5.77765	5.24943	0.720112	3.87339	6.82418	10.1851	6.96089	0.842665	12.3437	32.1992	57.784	34.109	1.53287
comp29695_c0_seq1	2.19665	0.248479	0.271556	0.905563	-0.0430814	4.35627	2.61362	0	2.3233	0.366105	18.4277	20.0626	5.84012	14.7768	1.16958
comp29711_c0_seq1	2.55582	8.23953	1.54029	4.11188	0.61404	0.855317	7.85583	3.07189	3.92768	0.594136	80.1516	37.7352	57.5341	58.4736	1.76696
comp29765_c0_seq1	2.58061	5.87139	6.09041	4.84747	0.685515	2.44255	2.32611	0.626605	1.79842	0.254891	0	0.434326	0	0.144775	-0.839305
comp29783_c0_seq1	2.61065	0.276852	2.57179	1.81976	0.260015	4.24699	8.08907	5.52019	5.95208	0.774669	11.5492	18.4265	9.58924	13.1883	1.12019
comp29788_c0_seq1	3.1375	2.19206	10.6093	5.31294	0.725335	4.25482	7.96022	10.434	7.54968	0.877929	58.2415	57.7441	99.0716	71.6857	1.85543
comp29820_c0_seq1	3.35489	19.291	11.9238	11.5232	1.06157	1.6633	3.69604	1.49345	2.28426	0.358746	0	0	0	0	NA
comp29880_c0_seq1	3.062	8.31275	0.567798	3.98085	0.599976	1.02471	0.759007	0.272614	0.685445	-0.164027	32.5103	9.35352	8.03366	16.6325	1.22096
comp29954_c0_seq1	2.61065	2.49167	0.907691	2.00334	0.301754	16.0172	7.76551	2.61483	8.79918	0.944442	16.6822	15.5568	28.939	20.3927	1.30947
comp2999_c0_seq1	3.53661	2.00025	0	1.84562	0.266143	3.72597	2.62996	1.31195	2.55596	0.407554	22.3094	18.1419	18.0938	19.5151	1.29037
comp30031_c0_seq1	2.79023	0.473433	3.88051	2.38139	0.376831	3.94255	1.24495	9.31565	4.83438	0.684341	33.7393	20.0169	42.606	32.1207	1.50679
comp30128_c0_seq1	2.42034	4.95638	1.62501	3.00058	0.477205	3.28956	4.88236	4.30971	4.16055	0.61915	17.7224	19.9321	51.6771	29.7772	1.47388
comp30170_c0_seq1	2.25523	1.82632	2.28107	2.12087	0.326515	2.66822	5.08205	9.03537	5.59521	0.747816	14.008	14.803	21.5162	16.7757	1.22468
comp30172_c0_seq1	3.09212	10.4931	10.5461	8.0438	0.905461	4.3527	10.0736	10.6185	8.34829	0.921598	19.1075	49.4766	68.726	45.77	1.66058
comp30182_c0_seq1	2.59568	2.56913	3.20884	2.79122	0.445794	3.53897	4.50391	2.31096	3.45128	0.53798	57.2024	98.1119	94.2076	83.1739	1.91999
comp30210_c0_seq1	2.54362	1.99195	12.6989	5.74482	0.759276	41.7615	22.5044	53.4798	39.2486	1.59382	28.4684	55.0603	31.4173	38.3153	1.58337
comp30234_c0_seq1	2.2035	2.05634	1.83871	2.03285	0.308105	0.983214	2.62177	1.17708	1.59402	0.202494	6.93193	11.4224	12.2562	10.2035	1.00875
comp30299_c0_seq1	2.16996	8.77988	5.95836	5.63607	0.750976	5.46192	18.1227	18.2791	13.9546	1.14472	19.2814	39.787	37.225	32.0978	1.50647
comp30351_c0_seq1	3.03649	2.72762	5.63066	3.79826	0.579584	4.782	0.531305	17.9698	7.76103	0.889919	34.0656	30.5879	57.5478	40.7338	1.60995
comp30368_c0_seq1	2.28504	0.704936	0	0.996657	-0.00145414	3.08969	1.02984	2.21934	2.11296	0.324891	147.445	59.8021	123.391	110.213	2.04223
comp30386_c0_seq1	2.13951	4.28367	1.26956	2.56425	0.40896	15.7201	20.5348	18.8197	18.3582	1.26383	16.9107	25.9839	28.6506	23.8484	1.37746
comp30392_c0_seq1	2.70822	29.4632	34.8582	22.3432	1.34915	15.283	56.5481	91.7658	54.5323	1.73665	0.939675	6.78341	4.68124	4.13477	0.616452
comp30465_c0_seq1	2.1523	0.497989	0	0.883428	-0.0538288	0.14551	0.970018	0.348403	0.487977	-0.311601	10.7718	6.70142	5.33888	7.60404	0.881044
comp30500_c0_seq1	2.63365	1.06397	0	1.23254	0.0908002	0	0	0	0	NA	17.6306	12.5377	1.97423	10.7142	1.02996
comp30521_c0_seq1	2.85787	3.46364	2.27119	2.86424	0.457009	6.07238	8.70328	1.99917	5.59161	0.747537	190.647	130.571	254.506	191.908	2.28309
comp30563_c0_seq1	2.43904	6.89743	11.6085	6.98167	0.843959	0.846468	1.93468	1.30291	1.36135	0.133971	0	0	0	0	NA
comp3063_c0_seq1	18.796	20.5154	9.47786	16.2631	1.2112	2.28882	2.17971	3.91445	2.79433	0.446277	4.59251	10.6835	10.382	8.55266	0.932101
comp30633_c0_seq1	2.51972	0	6.00739	2.84237	0.453681	2.2754	0.178454	3.36501	1.93962	0.287717	672.358	485.479	215.893	457.91	2.66078
comp30663_c0_seq1	2.26204	4.57623	14.8424	7.22688	0.858951	6.3407	16.9077	16.2663	13.1715	1.11964	0	0.805346	2.73915	1.1815	0.0724336
comp30757_c0_seq1	2.84065	15.52	10.0083	9.45633	0.975723	20.1958	29.7428	26.5046	25.4811	1.40622	496.637	1066	841.285	801.308	2.9038
comp30762_c0_seq1	2.26948	10.4826	10.0534	7.60182	0.880918	0	0	0.14967	0.0498901	-1.30199	0	0	0	0	NA
comp30787_c0_seq1	2.52615	1.96454	2.53735	2.34268	0.369713	2.19175	1.04363	1.6868	1.64073	0.215036	12.0032	16.7584	17.0113	15.2576	1.18349
comp30799_c0_seq1	2.12273	3.34448	2.8116	2.7596	0.440847	6.08897	11.8766	7.96453	8.64338	0.936684	28.6193	52.6324	27.6875	36.313	1.56006
comp3091_c0_seq1	22.8348	21.1838	88.2154	44.078	1.64422	16.2914	37.275	55.9491	36.5052	1.56235	1.09505	7.90508	4.77339	4.59117	0.661924
comp30966_c0_seq1	2.1337	0.724074	1.58264	1.48014	0.170303	1.58679	1.26936	0	0.95205	-0.0213404	20.3469	18.961	11.1962	16.8347	1.22621
comp30981_c0_seq1	2.43904	6.20769	1.31915	3.32196	0.521394	4.53465	2.82141	1.99055	3.11554	0.493533	29.1731	46.2838	38.822	38.093	1.58084
comp31088_c0_seq1	2.06302	0.750096	5.32843	2.71385	0.433586	3.17804	4.9677	3.54227	3.896	0.590619	16.5148	31.1005	27.0634	24.8929	1.39608
comp31093_c0_seq1	1.81948	0	0	0.606493	-0.217174	2.70621	1.65371	4.31974	2.89322	0.461382	19.6758	6.17553	10.1839	12.0117	1.07961
comp3116_c0_seq1	2.83175	10.863	11.6436	8.44611	0.926657	6.8671	4.88301	6.02882	5.92631	0.772784	0	0	0.25842	0.0861399	-1.0648
comp31186_c0_seq1	2.53026	0.780587	1.06635	1.45907	0.164075	5.81615	6.15796	5.32461	5.76624	0.760893	79.5989	100.714	111.045	97.1192	1.9873
comp31264_c0_seq1	1.95573	0	0	0.65191	-0.185812	0.161604	0.86184	5.4171	2.14685	0.331801	7.26336	24.1381	94.8698	42.0904	1.62418
comp31325_c0_seq1	2.59093	1.09904	5.04467	2.91154	0.464123	3.17924	1.28447	9.11159	4.5251	0.655628	99.4644	78.1859	42.6896	73.4466	1.86597
comp31595_c0_seq1	1.54245	2.61716	0.612903	1.59084	0.201625	2.1303	3.05873	10.0052	5.06473	0.704557	9.74803	31.8195	27.7499	23.1058	1.36372
comp31600_c0_seq1	2.01516	5.29982	0	2.43833	0.387092	8.24247	2.19788	0	3.48012	0.541594	203.655	42.5305	47.3725	97.8527	1.99057
comp31603_c0_seq1	2.09061	6.30622	7.96875	5.45519	0.73681	0.345497	0.460639	0.827242	0.544459	-0.264035	0	0	0.48756	0.16252	-0.789093
comp31615_c0_seq1	2.04214	0.945002	0	0.995714	-0.00186552	0.276126	0	0	0.0920419	-1.03601	4.56273	3.78069	15.9762	8.10655	0.908836
comp31627_c0_seq1	2.03693	0	9.63172	3.88955	0.589899	35.5224	0	11.6064	15.7096	1.19617	162	32.0538	146.966	113.673	2.05566
comp3164_c0_seq1	3.18762	1.49203	0.203825	1.62783	0.211608	0	0.435943	0	0.145314	-0.837692	7.13189	10.9888	14.0733	10.7313	1.03065
comp31687_c0_seq1	2.27801	3.28544	5.06904	3.54416	0.549514	1.18587	7.45367	2.63658	3.75871	0.575039	26.8738	26.9912	39.9246	31.2632	1.49503
comp31704_c0_seq1	2.36761	4.01725	7.68309	4.68931	0.671109	0.293456	3.13003	1.40527	1.60959	0.206714	0	0	0.41412	0.13804	-0.859995
comp3179_c0_seq1	18.2189	26.9125	4.7695	16.6336	1.22099	125.448	123.475	52.2873	100.403	2.00175	209.24	486.298	375.879	357.139	2.55284
comp31850_c0_seq1	2.3344	1.78241	6.06026	3.39235	0.530501	8.68019	8.56401	9.76821	9.00414	0.954442	0	2.16088	0.489974	0.883618	-0.0537355
comp31943_c0_seq1	1.99987	3.30399	2.43976	2.58121	0.411823	4.77488	1.77418	1.78051	2.77652	0.443501	24.5238	13.2508	14.2497	17.3415	1.23909
comp3195_c0_seq1	2.96571	15.5995	12.2362	10.2671	1.01145	0	1.47028	2.64041	1.37023	0.136793	0	0	0	0	NA
comp31957_c0_seq1	1.93546	4.32891	2.61018	2.95818	0.471025	3.79467	7.50171	2.03647	4.44428	0.647802	92.0227	65.8004	57.6121	71.8117	1.8562
comp31962_c0_seq1	1.73843	4.60888	2.01477	2.78736	0.445193	1.13123	3.01644	0.386936	1.51153	0.179418	45.93	12.8737	12.0868	23.6302	1.37347
comp32044_c0_seq1	2.17638	2.15412	0	1.4435	0.159417	0	0	0.645885	0.215295	-0.666966	45.4658	37.1023	62.0495	48.2059	1.6831
comp32072_c0_seq1	1.72518	4.55343	14.218	6.83221	0.834561	0.997869	0.570181	5.11982	2.22929	0.348166	0	0	0	0	NA
comp3210_c0_seq1	3.21054	8.25637	5.8604	5.77577	0.76161	0.447676	6.26714	3.75163	3.48881	0.542678	0	0.185744	0.421169	0.202304	-0.693995
comp32104_c0_seq1	1.93126	9.55753	1.34295	4.27725	0.631164	6.46304	35.7443	12.6091	18.2721	1.26179	68.3493	61.3778	99.4814	76.4029	1.88311
comp32109_c0_seq1	3.30084	0.13335	0.874409	1.4362	0.157215	0.935146	1.71434	13.5743	5.40795	0.733032	25.4965	10.9124	32.8266	23.0785	1.36321
comp32116_c0_seq1	1.90411	0.380096	0	0.761404	-0.118385	0	0.222113	0.199442	0.140518	-0.852267	27.7483	34.5258	27.8587	30.0443	1.47776
comp32178_c0_seq1	1.8338	6.37118	7.20578	5.13692	0.710703	2.85739	4.93523	7.15258	4.98173	0.69738	10.3875	32.6565	67.5411	36.8617	1.56658
comp32197_c0_seq1	1.89461	0	2.73253	1.54238	0.188192	4.3835	0	6.93461	3.7727	0.576653	18.8327	10.9124	26.0692	18.6048	1.26962
comp32201_c0_seq1	2.11338	1.79295	1.1022	1.66951	0.222588	0.196459	0.261932	0	0.152797	-0.815885	45.9677	47.0733	27.0309	40.024	1.60232
comp32317_c0_seq1	1.88619	5.42291	5.92655	4.41188	0.644624	4.51987	6.33788	13.3411	8.06629	0.906674	17.4097	16.1989	71.0418	34.8835	1.54262
comp32511_c0_seq1	2.05021	1.8843	32.9487	12.2944	1.08971	0.381174	0.338803	2.58588	1.10195	0.0421627	0	0	0	0	NA
comp32547_c0_seq1	1.15012	0	0	0.383373	-0.416379	6.32934	0	0	2.10978	0.324237	104.7	118.6	86.4218	103.24	2.01385
comp32576_c0_seq1	156.905	67.9733	267.739	164.206	2.21539	92.9457	68.2703	202.482	121.233	2.08362	14.9738	31.2888	32.1887	26.1504	1.41748
comp32632_c0_seq1	52.3857	25.7129	47.8571	41.9852	1.6231	19.6793	8.16112	44.5165	24.119	1.38236	0.756236	0.569654	1.93751	1.0878	0.0365498
comp32635_c0_seq1	1.74648	1.85209	5.86987	3.15615	0.499157	1.78587	4.76207	10.8844	5.81076	0.764233	13.7355	29.504	40.323	27.8542	1.44489
comp32657_c0_seq1	1.79828	0.339026	3.89038	2.00923	0.303029	1.33734	3.96227	0.711568	2.00373	0.301839	11	11.2824	17.6141	13.2988	1.12381
comp32669_c0_seq1	1.9091	3.23928	1.06203	2.07014	0.315999	3.54939	5.67873	7.81861	5.68224	0.75452	26.6508	12.5471	10.8191	16.6723	1.222
comp32682_c0_seq1	1.95663	1.82596	1.26989	1.68416	0.226383	2.91021	5.23809	6.27125	4.80652	0.68183	28.6607	69.0065	55.6476	51.1049	1.70846
comp3271_c0_seq1	3.24866	29.6489	1.27784	11.3918	1.05659	29.2111	75.3544	61.0894	55.2183	1.74208	61.4549	130.858	249.193	147.169	2.16782
comp32846_c0_seq1	1.53349	1.30098	0.888627	1.24103	0.093783	0	2.66084	2.04793	1.56959	0.195786	5.65333	19.1633	25.146	16.6542	1.22152
comp32994_c0_seq1	2.06302	1.12514	2.18602	1.7914	0.253192	0	0	0	0	NA	5.50493	9.13917	10.8254	8.48982	0.928898
comp3302_c0_seq1	11.0411	3.90294	15.9953	10.3131	1.01339	0.855317	0	0.409585	0.421634	-0.375064	0	0	0	0	NA
comp33078_c0_seq1	2.02505	1.47258	9.1196	4.20574	0.623843	9.89648	7.88809	28.3318	15.3721	1.18673	107.646	324.963	135.559	189.389	2.27736
comp33119_c0_seq1	2.31018	7.14788	1.25995	3.57267	0.552993	12.1273	30.4513	35.4492	26.0092	1.41513	33.6658	82.6452	108.387	74.8994	1.87448
comp33132_c0_seq1	1.74003	0.885722	1.45197	1.35924	0.133296	7.63473	5.00329	19.0548	10.5643	1.02384	14.0269	11.2748	15.1566	13.4861	1.12989
comp33359_c0_seq1	1.51502	3.37392	2.80935	2.56609	0.409273	2.81671	2.44102	1.18023	2.14598	0.331627	56.5969	36.2872	85.4601	59.448	1.77414
comp3340_c0_seq1	2.77381	4.23583	1.45735	2.82233	0.450608	6.87607	14.0265	5.67999	8.86084	0.947475	22.7242	18.4014	31.5361	24.2205	1.38418
comp33403_c0_seq1	2.18057	1.84995	3.15899	2.3965	0.379578	3.34463	3.51337	6.67352	4.51051	0.654225	18.0874	18.671	11.0131	15.9238	1.20205
comp33415_c0_seq1	1.74648	0.740835	0	0.829104	-0.0813912	18.021	16.0179	4.276	12.7716	1.10625	18.4571	26.4728	24.5146	23.1481	1.36452
comp33430_c0_seq1	1.91353	16.118	0	6.01051	0.778911	9.96134	0.406564	4.38078	4.91623	0.691632	426.622	192.312	273.973	297.636	2.47368
comp33596_c0_seq1	1.56708	1.20861	1.05669	1.27746	0.106347	0	0.42376	0.507342	0.310367	-0.508124	8.82329	5.80239	6.12985	6.91851	0.840013
comp3361_c0_seq1	2.91953	0.525395	2.29676	1.91389	0.281918	6.57936	4.73689	11.9725	7.76292	0.890025	15.3944	10.5644	22.5618	16.1735	1.20881
comp33734_c0_seq1	1.7546	5.58211	1.62681	2.98784	0.475357	6.36117	21.9639	13.0829	13.8027	1.13996	11.8588	63.952	55.2417	43.6842	1.64032
comp33778_c0_seq1	1.61319	2.00025	0.92043	1.51129	0.179348	3.13766	3.93725	0.220961	2.43196	0.385956	46.8453	37.4469	24.8739	36.3887	1.56097
comp33871_c0_seq1	218.533	320.393	17.5267	185.484	2.26831	55.9234	84.4471	2.58923	47.6532	1.67809	1.83795	9.22991	0.872024	3.97996	0.599879
comp33917_c0_seq1	2.31326	7.09524	0	3.13617	0.496399	4.63162	4.2344	0	2.95534	0.470607	136.798	26.684	36.4152	66.6323	1.82369
comp33939_c0_seq1	1.53349	5.52916	14.0403	7.03432	0.847222	0	1.14036	3.75453	1.63163	0.212622	0	0	0	0	NA
comp33972_c0_seq1	2.10855	0	0.355451	0.821334	-0.0854805	0.570211	3.61115	3.41321	2.53152	0.403382	12.2489	15.792	8.8514	12.2974	1.08981
comp33992_c0_seq1	18.1698	28.2605	17.916	21.4488	1.3314	5.6838	6.8631	8.47353	7.00681	0.84552	1.55942	4.13805	2.11872	2.6054	0.415874
comp34002_c0_seq1	1.82143	3.949	0	1.92348	0.284087	7.0738	13.0432	9.00912	9.70871	0.987161	13.1313	13.863	15.9294	14.3079	1.15558
comp3415_c0_seq1	3.22862	3.74823	2.04816	3.00834	0.478326	7.51908	17.3541	6.12718	10.3334	1.01424	160.121	226.979	237.807	208.302	2.31869
comp34213_c0_seq1	1.37414	3.55874	2.54812	2.49367	0.396839	2.63548	3.80062	1.22342	2.55317	0.40708	87.6665	54.5622	47.5898	63.2728	1.80122
comp3436_c0_seq1	3.09212	2.29537	14.9318	6.77311	0.830788	0.670699	1.02196	2.40883	1.36717	0.135821	0	0.238523	0.270423	0.169649	-0.77045
comp34427_c0_seq1	1.23627	0.749159	1.96496	1.3168	0.119519	4.07156	5.25335	17.4534	8.92611	0.950662	6.42404	23.7049	24.2803	18.1364	1.25855
comp34453_c0_seq1	1.53975	0.163286	2.49831	1.40045	0.146267	4.36561	7.9197	3.5985	5.2946	0.723833	759.597	801.018	500.024	686.88	2.83688
comp34474_c0_seq1	1.4802	4.30548	6.27378	4.01982	0.604207	4.56041	7.75753	8.47181	6.92992	0.840728	14.5516	28.7736	35.5066	26.2773	1.41958
comp34577_c0_seq1	1.79393	3.26128	1.54447	2.1999	0.342402	4.3835	7.75012	7.41539	6.51634	0.814004	15.7464	21.5877	94.537	43.957	1.64303
comp34595_c0_seq1	1.90377	0.124239	2.444	1.49067	0.173381	4.35627	2.75883	10.4304	5.84851	0.767045	36.2796	21.0115	40.5735	32.6215	1.5135
comp34692_c0_seq1	1.76097	3.15393	0	1.6383	0.214393	49.7645	135.414	58.5316	81.2369	1.90975	23.6595	127.327	57.2903	69.4256	1.84152
comp3489_c0_seq1	6.84644	0.363023	5.55432	4.25459	0.628858	13.4926	14.7647	45.4112	24.5562	1.39016	67.054	291.606	738.538	365.733	2.56316
comp3491_c0_seq1	4.17517	11.946	9.86746	8.66286	0.937662	7.54936	14.3674	17.7843	13.2337	1.12168	37.2629	43.7256	53.955	44.9811	1.65303
comp34912_c0_seq1	1.48686	1.80203	0	1.0963	0.0399288	2.21149	3.58033	0.567331	2.11972	0.326278	13.3643	7.86482	9.8083	10.3458	1.01476
comp34916_c0_seq1	1.40528	0.529869	2.46108	1.46541	0.165959	9.75401	2.47708	13.9015	8.71086	0.940061	103.92	37.1457	100.122	80.3959	1.90523
comp34930_c0_seq1	2.36619	1.29049	0	1.21889	0.0859657	1.75968	0.50274	0	0.754141	-0.122547	46.5235	30.3515	29.7988	35.5579	1.55094
comp34983_c0_seq1	1.38691	1.34471	0.734797	1.15547	0.0627591	2.6522	4.71477	3.35155	3.57284	0.553014	14.2188	24.5759	18.2978	19.0309	1.27946
comp3500_c0_seq1	4.13035	7.4462	4.06887	5.21514	0.717266	27.1969	10.2383	10.6488	16.028	1.20488	35.7831	28.1971	32.6906	32.2236	1.50817
comp35070_c0_seq1	1.51415	0.18351	3.60994	1.7692	0.247777	7.72139	7.50651	36.3977	17.2085	1.23574	12.7589	16.4187	41.9961	23.7246	1.3752
comp35113_c0_seq1	1.43328	19.3338	11.8271	10.8647	1.03602	0	0	0	0	NA	0	0	0	0	NA
comp35134_c0_seq1	1.56603	69.5292	7.25985	26.1183	1.41695	0.258804	13.9747	6.3516	6.8617	0.836432	0.34212	1.61069	0.36522	0.772678	-0.112002
comp35216_c0_seq1	2.01649	2.23713	0.862903	1.70551	0.231853	1.15355	5.07536	1.93341	2.72077	0.434692	39.4952	50.3983	48.8362	46.2432	1.66505
comp35248_c0_seq1	1.41465	2.20028	1.31161	1.64218	0.215421	2.27942	1.40265	0.734694	1.47225	0.167982	16.5727	12.9858	11.6295	13.7294	1.13765
comp35279_c0_seq1	2.00659	1.02141	1.11627	1.38142	0.140326	1.79071	0	0.535947	0.775551	-0.11039	8.28513	5.75805	9.68689	7.91002	0.898178
comp35359_c0_seq1	1.52728	0	0.708023	0.745102	-0.127784	2.55556	0	1.18979	1.24845	0.096371	9.94711	4.06455	79.9411	31.3176	1.49579
comp35420_c0_seq1	1.46786	1.08963	0	0.852496	-0.0693077	0	0	0	0	NA	7.39552	14.2669	8.47254	10.045	1.00195
comp35608_c0_seq1	1.1838	1.33908	2.56103	1.69464	0.229077	5.13548	7.04257	4.91845	5.69883	0.755786	13.5775	15.524	12.2165	13.7727	1.13902
comp35707_c0_seq1	1.3788	2.33948	4.34648	2.68825	0.42947	4.51167	3.82788	2.33236	3.5573	0.551121	35.3779	46.5853	31.1105	37.6912	1.57624
comp3577_c0_seq1	6.99426	8.99636	6.48485	7.49182	0.874588	6.87936	6.93493	2.61135	5.47522	0.738401	0	2.50621	0	0.835402	-0.0781043
comp35780_c0_seq1	1.41288	0.449495	2.29246	1.38494	0.141432	1.44475	9.98137	10.2205	7.21553	0.858268	4.51419	19.9448	34.289	19.5827	1.29187
comp35872_c0_seq1	2.2035	2.24328	0.817204	1.75466	0.244193	0.327738	1.52936	0	0.619034	-0.208285	10.1813	7.34295	9.94372	9.15598	0.961705
comp35911_c0_seq1	2.27042	0.889002	1.61928	1.5929	0.202188	0	0.346332	0	0.115444	-0.937628	494.134	499.871	537.763	510.589	2.70807
comp35956_c0_seq1	1.2248	0.173182	0	0.465994	-0.331619	0.759047	0.607206	0.908712	0.758322	-0.120146	6.62247	6.6136	9.42616	7.55408	0.878181
comp35968_c0_seq1	1.96479	2.16694	3.4612	2.53098	0.403288	6.28301	1.55849	1.74927	3.19693	0.504733	79.9663	71.1128	148.874	99.9845	1.99993
comp3600_c0_seq1	4.81629	11.5454	6.28287	7.54819	0.877843	2.45726	4.60885	4.83647	3.96752	0.59852	167.646	161.432	260.602	196.56	2.29349
comp36272_c0_seq1	1.1183	3.63683	1.90089	2.21867	0.346093	1.94052	10.7185	5.9738	6.21094	0.793157	87.5841	105.76	79.8057	91.05	1.95928
comp36521_c0_seq1	0.873238	0.740835	2.2265	1.28019	0.107275	0	0	0	0	NA	4.50696	6.26455	5.95681	5.57611	0.746331
comp36633_c0_seq1	1.96479	0.303069	2.98094	1.7496	0.242938	3.71933	1.41681	3.81659	2.98425	0.474835	17.0328	6.11758	20.9946	14.715	1.16776
comp3664_c0_seq1	7.32905	3.63683	5.89777	5.62122	0.74983	14.0889	6.71844	10.8342	10.5472	1.02314	0	0.25601	0	0.0853368	-1.06886
comp36707_c0_seq1	1.61213	0.85481	1.49472	1.32055	0.120756	2.39781	2.7973	1.25589	2.15033	0.332506	7.92432	11.3788	21.5714	13.6248	1.13433
comp36718_c0_seq1	1.36681	2.31914	2.74573	2.14389	0.331203	1.35528	4.74325	3.04221	3.04691	0.48386	32.9204	41.5411	41.1199	38.5271	1.58577
comp36750_c0_seq1	1.17155	1.73935	0.543111	1.15134	0.0612026	0.762347	1.88762	0	0.883322	-0.0538811	13.6768	24.6716	59.477	32.6085	1.51333
comp36969_c0_seq1	2.10513	0	0.390361	0.831829	-0.0799658	0	0	0	0	NA	26.6968	23.1889	17.0113	22.299	1.34829
comp37034_c0_seq1	1.333	0.282722	0	0.538574	-0.268755	0.24783	0.330423	0.890089	0.489447	-0.310294	4.58659	9.25437	13.115	8.98533	0.953534
comp3704_c0_seq1	3.43023	1.32614	0.563615	1.77333	0.248789	17.308	10.5048	7.03574	11.6162	1.06506	105.051	139.671	188.608	144.443	2.1597
comp37086_c0_seq1	1.24501	0	1.58721	0.944074	-0.0249938	6.59695	0.308613	21.7533	9.55296	0.980138	22.4902	9.36381	62.39	31.4147	1.49713
comp3710_c0_seq1	5.07537	7.67221	9.41144	7.38634	0.868429	5.28422	5.12382	6.16182	5.52328	0.742197	27.4878	18.1091	25.0826	23.5598	1.37217
comp37231_c0_seq1	1.38014	5.07382	1.49289	2.64895	0.423074	3.42127	3.64916	4.71023	3.92689	0.594048	30.0757	46.4178	37.6587	38.0507	1.58036
comp37343_c0_seq1	1.23685	0.524657	2.00684	1.25611	0.0990294	11.3827	9.65756	4.95531	8.6652	0.937778	15.9591	15.4563	8.59944	13.3383	1.1251
comp3738_c0_seq1	4.84136	8.05031	9.87525	7.58897	0.880183	0	0.192012	0.172413	0.121475	-0.915514	0	0	0	0	NA
comp3746_c0_seq1	10.243	15.8141	3.25123	9.76947	0.989871	27.725	40.2586	14.4597	27.4811	1.43903	326.134	229.781	360.26	305.392	2.48486
comp37518_c0_seq1	0.924605	4.70648	6.00084	3.87731	0.588531	2.23472	8.02166	33.5448	14.6004	1.16437	19.9973	23.1087	66.7109	36.6056	1.56355
comp3753_c0_seq1	6.86115	7.93752	0.346988	5.04855	0.703167	65.6365	80.9551	36.2627	60.9514	1.78498	45.3762	128.698	111.936	95.3365	1.97926
comp37625_c0_seq1	1.16637	8.62301	17.6118	9.13372	0.960647	0	0.660846	0	0.220282	-0.657021	0	0	0	0	NA
comp37763_c0_seq1	1.09155	1.29646	4.45301	2.28034	0.357999	3.89644	1.73166	4.276	3.30137	0.518694	16.3109	9.90203	16.954	14.389	1.15803
comp37818_c0_seq1	1.16913	0.330621	7.04586	2.84853	0.454622	10.8682	2.51162	11.7967	8.39218	0.923875	134.474	50.8646	117.379	100.906	2.00392
comp37900_c0_seq1	1.09662	0.775293	0.508377	0.793431	-0.100491	0.135922	0.724881	1.78995	0.883585	-0.0537515	7.72622	10.3203	5.75434	7.93362	0.899471
comp3796_c0_seq1	3.90355	19.6051	33.7313	19.08	1.28058	15.2116	17.0299	6.81173	13.0177	1.11454	1.22801	1.58989	0.983192	1.26703	0.102787
comp3808_c0_seq2	6.7833	7.79682	3.55038	6.0435	0.781288	0.976371	0.976319	0.584443	0.845711	-0.072778	0	0	0	0	NA
comp38095_c0_seq1	0.94041	0.227949	2.24207	1.13681	0.0556882	2.99726	5.46139	10.1667	6.20845	0.792983	40.1499	51.7331	63.4453	51.7761	1.71413
comp38119_c0_seq1	1.09155	0	0	0.363849	-0.439079	1.62352	0.649373	0.388727	0.887206	-0.0519756	5.15081	5.45622	10.0808	6.89593	0.838593
comp38166_c0_seq1	0.943097	1.6002	2.33176	1.62502	0.210858	2.80544	5.61058	10.6356	6.35053	0.80281	11.4348	13.5314	15.671	13.5457	1.1318
comp38168_c0_seq1	1.13626	24.5814	2.45818	9.39196	0.972756	4.7884	4.31872	2.86628	3.99113	0.601096	0	0.1753	0	0.0584334	-1.23334
comp38201_c0_seq1	1.22708	1.04102	1.13771	1.13527	0.055099	2.73765	13.5572	1.71676	6.00386	0.77843	15.5099	22.8796	23.3639	20.5845	1.31354
comp38226_c0_seq1	1.53349	0.487867	3.90996	1.97711	0.29603	11.5468	14.2545	4.7785	10.1933	1.00831	1006.67	1178.19	908.676	1031.18	3.01333
comp38339_c0_seq1	0.906824	0.192332	1.26117	0.786774	-0.10415	1.18017	6.5187	3.83494	3.84461	0.584852	25.8531	26.6515	39.4947	30.6665	1.48666
comp3838_c0_seq1	7.82012	5.76042	7.29398	6.95817	0.842495	15.3227	17.5969	15.634	16.1845	1.2091	46.5875	48.3312	84.0843	59.6676	1.77574
comp38392_c0_seq1	1.50895	3.68047	2.62323	2.60422	0.415677	4.62897	4.48847	7.89271	5.67005	0.753587	12.2383	37.3642	34.8391	28.1472	1.44944
comp38402_c0_seq1	1.07988	3.05382	0	1.3779	0.139218	0.133847	0.178454	0	0.1041	-0.982548	18.5783	17.16	18.5105	18.083	1.25727
comp38418_c0_seq1	1.25746	0.889002	1.5545	1.23366	0.0911942	4.36402	0.831197	1.11953	2.10492	0.323235	51.096	3.49198	18.2553	24.2811	1.38527
comp38435_c0_seq1	0.924605	1.88259	1.71453	1.50724	0.178183	1.37521	3.11699	0.823187	1.7718	0.248414	17.8157	13.5229	10.2856	13.8747	1.14222
comp38476_c0_seq1	0.865226	0	0.200552	0.35526	-0.449454	0	0	2.69612	0.898708	-0.0463813	111.215	105.32	82.8573	99.7974	1.99912
comp3850_c0_seq1	5.4495	12.6431	5.98063	8.02441	0.904413	0.744367	1.65406	0.396061	0.931497	-0.0308184	0	0	0.116715	0.0389052	-1.40999
comp38514_c0_seq1	5.57496	10.2476	15.5068	10.4431	1.01883	0.690995	0	0.827242	0.506079	-0.295782	0	0	0	0	NA
comp38571_c0_seq1	1.10519	0.31254	0.683132	0.700288	-0.154723	6.57525	4.5659	11.8076	7.64958	0.883637	24.2651	42.9677	36.5356	34.5895	1.53894
comp38580_c0_seq1	1.31442	0.836343	3.50373	1.88483	0.275272	1.58845	2.11782	6.58262	3.42963	0.535247	20.9981	21.9009	19.3121	20.737	1.31675
comp3865_c0_seq1	6.44912	9.53063	2.12173	6.03382	0.780593	0	0	0	0	NA	0.0681725	0	0.145551	0.0712412	-1.14727
comp38728_c0_seq1	5.29054	6.04955	15.5687	8.96961	0.952774	11.1191	18.0177	17.817	15.6513	1.19455	48.8448	63.6648	60.3504	57.62	1.76057
comp3874_c0_seq1	5.81079	10.1649	1.38265	5.78611	0.762386	0.152968	0.30592	0.640954	0.366614	-0.435791	16.7331	42.2218	41.3384	33.4311	1.52415
comp3894_c0_seq1	7.07821	13.2786	9.42809	9.92831	0.996876	0	0	0	0	NA	0	0	0	0	NA
comp39192_c0_seq1	1.04018	2.05909	2.08958	1.72962	0.23795	1.03141	0.687571	2.31521	1.34473	0.128636	9.71458	25.8368	24.9256	20.159	1.30447
comp39201_c0_seq1	257.592	377.959	60.9041	232.152	2.36577	7.32764	4.41961	5.84831	5.86519	0.768282	3.69013	2.60596	1.96965	2.75525	0.44016
comp39260_c0_seq1	0.869214	0	0	0.289738	-0.537995	2.74726	0.21546	0	0.987574	-0.00543048	6.8361	28.9657	2.96468	12.9222	1.11134
comp39351_c0_seq1	1.2014	0.637024	0	0.612807	-0.212676	15.1887	6.10493	0.534809	7.27614	0.861901	31.0033	4.03135	18.1243	17.7197	1.24846
comp39357_c0_seq1	2.56044	0.362037	0.19783	1.0401	0.0170766	0	0.21156	0.759864	0.323808	-0.489712	29.5764	23.3062	29.3341	27.4056	1.43784
comp3958_c0_seq1	5.89864	29.822	6.10496	13.9419	1.14432	1.53024	1.9722	2.62582	2.04275	0.310216	0.269715	1.96821	0.971752	1.06989	0.0293398
comp3967_c0_seq1	5.34422	4.88951	10.2014	6.81172	0.833257	4.98745	9.97437	9.14286	8.03489	0.90498	32.2441	25.5109	38.4902	32.0817	1.50626
comp39743_c0_seq1	0.920094	7.02528	6.61138	4.85225	0.685944	8.03998	11.8598	11.4684	10.456	1.01937	17.4123	21.2926	41.7625	26.8224	1.4285
comp3977_c0_seq1	5.51773	6.00538	6.79871	6.10728	0.785848	7.31595	5.32696	8.53224	7.05838	0.848705	0.142748	0.403231	0	0.181993	-0.739945
comp39818_c0_seq1	0.873238	0.370418	1.61928	0.95431	-0.0203104	1.13646	3.46332	2.138	2.24593	0.351396	6.2239	20.6124	35.7409	20.8591	1.31929
comp39828_c0_seq1	1.18878	0.336177	0	0.508318	-0.293864	5.3044	36.5395	11.6422	17.8287	1.25112	10.9076	53.9203	60.2997	41.7092	1.62023
comp3983_c0_seq1	8.02336	6.92626	7.30849	7.41937	0.870367	4.0302	7.46682	14.7879	8.76163	0.942585	27.5376	38.8939	99.861	55.4309	1.74375
comp40004_c0_seq1	6.18049	7.37958	13.1586	8.90622	0.949693	0.170233	1.13483	1.01899	0.774684	-0.110875	0	0	0.48046	0.160153	-0.795464
comp40256_c0_seq1	1.26469	3.2188	4.35529	2.94626	0.469271	8.19596	14.5101	14.155	12.287	1.08945	611.703	755.927	859.487	742.372	2.87062
comp40340_c0_seq1	1.04325	0.354027	0.773813	0.723696	-0.140444	0.620672	0	0.55729	0.392654	-0.40599	3.28193	9.27075	9.41574	7.32281	0.864677
comp40358_c0_seq1	1.2248	1.03909	0	0.754631	-0.122265	8.80495	6.67926	1.45394	5.64605	0.751745	325.906	315.752	298.424	313.361	2.49604
comp4036_c0_seq1	4.87809	9.78181	1.64466	5.43485	0.735188	2.63834	6.52223	2.50053	3.88703	0.589618	21.5075	32.4979	22.6494	25.5516	1.40742
comp40432_c0_seq1	0.915628	0.258933	0	0.39152	-0.407246	4.19908	4.08537	0	2.76148	0.441143	136.221	189.149	143.017	156.129	2.19348
comp40441_c0_seq1	0.785914	0	0	0.261971	-0.581746	0	0	0	0	NA	23.7581	45.1048	20.4135	29.7588	1.47362
comp4050_c0_seq1	6.54928	10.6363	5.89879	7.69478	0.886196	0.278317	1.20598	0.166597	0.550298	-0.259402	0.367915	1.03928	0.883703	0.763633	-0.117115
comp40526_c0_seq1	0.779419	1.98372	1.4453	1.40282	0.147001	6.376	5.02325	1.73481	4.37802	0.641278	7.27924	16.053	29.038	17.4568	1.24196
comp40532_c0_seq1	0.827278	0.526383	0.383513	0.579058	-0.237278	3.38375	2.66585	0.736535	2.26204	0.354501	7.92954	9.57232	44.2782	20.5933	1.31373
comp4062_c0_seq1	6.01977	7.37683	3.87593	5.75751	0.760234	0	0	0	0	NA	0	0	0	0	NA
comp40779_c0_seq1	0.782653	0	2.35836	1.04701	0.019949	1.16408	2.71605	11.1489	5.00967	0.699809	8.84828	8.87485	31.6226	16.4486	1.21613
comp40883_c0_seq1	1.52817	0.185209	1.61928	1.11088	0.0456685	2.27292	2.81395	2.72109	2.60265	0.415416	112.459	84.2683	188.785	128.504	2.10892
comp4089_c0_seq1	4.17627	2.46668	4.95041	3.86445	0.587088	9.23876	9.69691	10.8251	9.92025	0.996523	275.909	198.088	277.174	250.39	2.39862
comp40901_c0_seq1	0.902485	1.14847	1.67351	1.24149	0.0939428	0.167789	1.56595	1.20524	0.97966	-0.00892453	8.4286	16.2903	20.8368	15.1852	1.18142
comp40951_c0_seq1	0.877299	1.67463	2.44021	1.66405	0.221166	8.97088	10.0034	4.49115	7.8218	0.893307	113.198	188.202	211.99	171.13	2.23333
comp4162_c0_seq1	4.40357	11.6746	25.0074	13.6952	1.13657	1.91032	1.63733	4.0839	2.54385	0.405491	0	0	0	0	NA
comp4174_c0_seq1	3.81512	17.2514	24.407	15.1578	1.18064	2.55349	27.1602	25.8485	18.5207	1.26766	362.119	941.825	538.275	614.073	2.78822
comp4202_c0_seq1	9.52079	15.3162	13.3243	12.7204	1.1045	8.14913	12.6461	19.112	13.3024	1.12393	107.726	76.9899	110.852	98.5224	1.99353
comp4246_c0_seq1	8.73238	49.2992	12.5126	23.5147	1.37134	4.36874	13.5384	3.81659	7.24126	0.859814	0.624341	2.93938	1.16637	1.5767	0.197748
comp4247_c0_seq1	10.6908	13.0704	2.7367	8.83263	0.94609	0.588928	0.99934	0.128191	0.572153	-0.242488	0.212323	0.333204	0	0.181843	-0.740304
comp4265_c0_seq1	5.31822	33.3877	17.9155	18.8738	1.27586	7.51457	11.6008	15.7829	11.6328	1.06568	2.96268	1.96916	2.97668	2.63618	0.420975
comp4339_c0_seq1	3.23917	11.8377	26.625	13.9006	1.14303	0	0.123527	0	0.0411756	-1.38536	0	0	0	0	NA
comp4369_c0_seq1	4.10042	11.5129	8.87081	8.16136	0.911763	1.88772	4.06564	5.47598	3.80978	0.5809	0.479889	0.361489	0	0.280459	-0.55213
comp4392_c0_seq1	10.9136	12.578	9.92778	11.1398	1.04688	0	0	0.18333	0.0611099	-1.21389	0.202434	0	0	0.0674779	-1.17084
comp4472_c0_seq1	3.82983	7.98748	0.887725	4.23501	0.626855	0	0.712003	0.0710364	0.261013	-0.583338	7.37324	20.2369	23.1946	16.9349	1.22878
comp4542_c0_seq1	5.71315	9.69382	14.3099	9.90564	0.995883	12.1755	14.6267	11.2358	12.6794	1.1031	43.6748	76.4858	49.2189	56.4598	1.75174
comp4546_c0_seq1	4.74043	1.69334	3.00723	3.147	0.497897	8.90615	2.96856	2.77662	4.88378	0.688756	42.6781	30.7165	29.8495	34.4147	1.53674
comp4564_c0_seq1	6.65898	1.37949	10.984	6.3408	0.802144	0.460663	0	1.79236	0.751007	-0.124356	0.152241	0.143349	0	0.0985299	-1.00643
comp4586_c0_seq1	11.7039	28.205	17.614	19.1743	1.28272	10.7222	9.25006	10.1181	10.0301	1.00131	0.667011	0	0	0.222337	-0.652988
comp4625_c0_seq1	6.88285	7.64072	16.0218	10.1818	1.00782	17.5884	6.75186	9.90892	11.4164	1.05753	4926.11	3637.84	7404.89	5322.95	3.72615
comp4672_c0_seq2	10.0136	50.0965	15.0799	25.0633	1.39904	0.0451325	0.722083	0.648379	0.471865	-0.326183	0	0.112355	0.254761	0.122372	-0.912318
comp4688_c0_seq1	5.25072	7.73087	13.9767	8.9861	0.953571	7.45698	16.9957	14.7783	13.077	1.11651	0.399632	2.94761	1.91977	1.75567	0.244443
comp4700_c0_seq1	8.54682	7.876	7.65108	8.02463	0.904425	11.1779	10.6659	13.1195	11.6545	1.06649	28.9733	34.7834	47.1676	36.9748	1.56791
comp4770_c0_seq1	9.30688	15.0019	0	8.10293	0.908642	43.1428	34.1433	1.1048	26.1303	1.41714	366.589	321.917	208.531	299.012	2.47569
comp4785_c0_seq1	4.57074	5.26723	1.76577	3.86791	0.587477	4.24895	3.55004	3.49289	3.76396	0.575645	39.355	27.2194	34.6971	33.7572	1.52837
comp4824_c0_seq1	5.12553	3.30477	7.03329	5.15453	0.712189	1.52469	4.06564	7.11877	4.23637	0.626994	23.5818	22.2044	25.6043	23.7968	1.37652
comp4833_c0_seq1	5.2708	6.14849	49.9163	20.4452	1.31059	1.46992	4.19954	2.59772	2.75572	0.440236	0.185059	1.48113	1.38288	1.01636	0.00704602
comp4856_c0_seq1	9.48517	10.9784	14.9504	11.8047	1.07205	0	0	0	0	NA	0	0.501721	0.142205	0.214642	-0.668285
comp4868_c0_seq1	10.031	12.3852	11.9162	11.4442	1.05858	4.5292	9.23552	5.7412	6.50197	0.813045	0	0.911961	0.0939931	0.335318	-0.474543
comp4869_c0_seq1	4.5976	5.5007	4.15344	4.75058	0.676747	1.40272	2.80529	7.4519	3.88664	0.589574	192.499	195.005	209.95	199.151	2.29918
comp4871_c0_seq1	4.33155	6.93199	3.01206	4.75853	0.677473	22.1829	53.0994	27.5209	34.2677	1.53489	132.394	174.235	177.907	161.512	2.2082
comp4872_c0_seq1	3.5135	9.53063	6.38661	6.47691	0.811368	2.92233	1.42098	1.97565	2.10632	0.323524	0.363587	0.641908	0.194068	0.399854	-0.398098
comp4919_c0_seq1	78.699	106.19	24.7213	69.87	1.84429	0.389978	0.0799912	0.125696	0.198555	-0.702119	0.277589	0.392064	0.317498	0.32905	-0.482738
comp4925_c0_seq1	60.085	79.3117	23.2308	54.2092	1.73407	0.194822	0.575159	0.533111	0.434364	-0.362146	0	0.0692853	0.0392757	0.036187	-1.44145
comp498_c0_seq1	9.56135	19.9104	7.65611	12.3759	1.09258	2.26245	1.72368	1.54774	1.84462	0.265908	0.854512	3.62072	0.912209	1.79581	0.254261
comp5001_c0_seq1	2.18309	0	0	0.727698	-0.138049	0.487055	0.86583	0	0.450962	-0.34586	5.36543	5.25414	9.85165	6.82374	0.834022
comp5088_c0_seq1	84.4606	102.247	10.6599	65.789	1.81815	0.777295	0.876902	0.214744	0.622981	-0.205525	34.6988	42.0497	14.9348	30.5611	1.48517
comp5196_c0_seq1	88.6939	115.398	15.486	73.1928	1.86447	0.430546	0.287016	2.42256	1.04671	0.0198257	1.19522	1.01823	2.67335	1.62893	0.211903
comp5201_c0_seq1	1.70696	1.08611	2.17613	1.6564	0.219166	2.85622	4.01965	1.7097	2.86185	0.456647	31.8838	38.9095	53.9658	41.5864	1.61895
comp5202_c0_seq1	1.70439	1.92796	1.0535	1.56195	0.193667	1.12668	0	0.337209	0.487964	-0.311613	10.7981	11.7451	5.16735	9.23685	0.965524
comp5240_c0_seq1	97.5957	129.912	34.174	87.2273	1.94065	6.43524	5.5389	1.95041	4.64152	0.66666	1.39987	1.06463	0.114953	0.859818	-0.0655935
comp5248_c0_seq1	98.8525	76.5801	95.2752	90.2359	1.95538	78.6496	61.2588	94.7235	78.2106	1.89327	4.68932	11.3119	5.14897	7.05008	0.848194
comp5266_c0_seq1	97.8398	32.8064	33.9314	54.8592	1.73925	63.633	36.2864	71.6528	57.1907	1.75733	5.85834	12.0217	7.1376	8.3392	0.921125
comp5269_c0_seq1	22.3143	30.7182	8.39276	20.4751	1.31123	90.9576	102.276	64.4731	85.9023	1.934	331.124	336.337	400.759	356.073	2.55154
comp5305_c0_seq1	75.9697	48.3831	17.6582	47.337	1.6752	6.34738	3.77676	1.25602	3.79339	0.579027	0.693452	0.195885	0.222082	0.370473	-0.431243
comp5326_c0_seq1	3.39456	10.0169	9.51039	7.64063	0.883129	7.13433	14.4142	20.2357	13.9281	1.14389	26.6246	77.9411	81.7819	62.1159	1.7932
comp5556_c0_seq1	1.84019	0	0.853082	0.897757	-0.0468413	7.52679	3.19301	2.66231	4.4607	0.649403	23.744	68.3492	51.66	47.9177	1.6805
comp5704_c0_seq1	4.13639	1.40369	19.3674	8.30249	0.919208	0	0	0	0	NA	0	0	0	0	NA
comp5707_c0_seq1	1.60625	0.97336	0.212752	0.930786	-0.03115	5.20474	1.3651	0.817178	2.46234	0.391348	17.0315	10.3018	11.7999	13.0444	1.11542
comp5719_c0_seq1	7.89674	9.85771	1.7781	6.51085	0.813638	0	0	0	0	NA	0	0	0	0	NA
comp5831_c0_seq1	1.43437	5.47598	2.32732	3.07922	0.488441	0.933368	10.4887	3.35222	4.92477	0.692386	17.9789	24.2314	20.6981	20.9695	1.32159
comp5963_c0_seq1	1.55242	110.796	13.314	41.8875	1.62208	0.721563	18.6635	8.46561	9.28354	0.967714	0.953854	1.2574	0	0.737085	-0.132482
comp6066_c0_seq1	67.7048	71.9158	4.76332	48.128	1.6824	34.7951	13.0986	0.326712	16.0735	1.20611	1.80379	3.22703	0.770231	1.93368	0.286385
comp6103_c0_seq1	221.091	65.717	291.993	192.934	2.28541	191.019	26.0371	167.679	128.245	2.10804	17.9507	10.0194	33.4855	20.4852	1.31144
comp6166_c0_seq1	228.308	270.514	337.872	278.898	2.44545	116.998	202.9	186.234	168.711	2.22714	12.6401	34.978	20.5208	22.713	1.35627
comp6170_c0_seq1	6.69359	9.91652	8.52178	8.3773	0.923104	4.3835	3.16982	5.51465	4.35599	0.639087	21.8036	24.6917	29.6714	25.3889	1.40464
comp6175_c0_seq1	255.059	370.085	284.76	303.301	2.48187	20.1641	46.1594	20.9516	29.0917	1.46377	0.1312	0.123537	0.0466862	0.100474	-0.997945
comp6180_c0_seq1	258.756	308.36	279.12	282.079	2.45037	82.8775	234.801	158.206	158.628	2.20038	8.4471	48.4891	39.0575	31.9979	1.50512
comp6292_c0_seq1	2.71178	0.766871	0	1.15955	0.0642896	1.90465	0.149376	0.268259	0.774095	-0.111206	29.0289	9.34356	26.2457	21.5394	1.33323
comp6382_c0_seq1	1.2248	1.55864	0	0.927814	-0.0325392	1.36628	0.607206	0	0.65783	-0.181886	6.92349	26.7851	7.39097	13.6998	1.13672
comp6432_c0_seq1	1.27878	6.5093	1.48205	3.09004	0.489964	8.67784	7.76606	0.569254	5.67105	0.753664	1185.65	1144.96	932.04	1087.55	3.03645
comp6439_c0_seq1	21.3178	29.2971	6.75064	19.1218	1.28153	0	0.135784	0.0812827	0.0723555	-1.14053	0.179506	0.612702	0.862316	0.551508	-0.258448
comp6449_c0_seq1	6.72067	15.6562	39.9919	20.7896	1.31785	3.52318	11.1971	13.9288	9.5497	0.97999	0.324934	3.5185	2.02343	1.95562	0.291285
comp6517_c0_seq1	399.78	648.833	434.707	494.44	2.69411	219.483	374.199	224.877	272.853	2.43593	123.453	163.09	109.051	131.865	2.12013
comp6551_c0_seq1	3.73309	315.373	0.728674	106.612	2.02781	2.33787	56.1058	0	19.4812	1.28962	0	0.363748	0	0.121249	-0.916321
comp6559_c0_seq1	568.766	400.627	116.468	361.953	2.55865	0.864986	0.0961045	0.431475	0.464189	-0.333306	0.571724	0.44861	0.101721	0.374018	-0.427107
comp6597_c0_seq1	123.364	200.222	44.5795	122.722	2.08892	63.4177	40.6193	6.62882	36.8886	1.56689	7.02679	11.8544	5.79957	8.22691	0.915237
comp6614_c0_seq1	498.054	725.391	138.522	453.989	2.65705	5.64572	1.54846	8.41968	5.20462	0.716389	60.5161	6.62577	14.1588	27.1002	1.43297
comp6623_c0_seq1	5.58872	4.74134	0.64771	3.65926	0.563393	10.91	26.4944	8.70748	15.3706	1.18669	33.9954	97.9695	54.6194	62.1947	1.79375
comp6632_c0_seq1	669.309	451.225	1143.57	754.702	2.87778	313.144	229.4	720.365	420.97	2.62425	6.14165	4.50873	3.29669	4.64902	0.667362
comp6679_c0_seq1	2.09155	1.77442	2.1155	1.99382	0.299687	2.82806	1.88528	1.52356	2.07897	0.317847	9.53315	17.4247	42.5033	23.1537	1.36462
comp6721_c0_seq1	147.278	252.791	264.433	221.501	2.34537	318.907	528.209	443.929	430.348	2.63382	836.27	869.534	880.15	861.984	2.9355
comp6724_c0_seq1	1.90377	2.85751	1.222	1.99442	0.299818	7.84129	0.580806	1.56457	3.32889	0.522299	31.2408	14.0981	22.8994	22.7461	1.35691
comp6758_c0_seq1	1.48686	0	0.393878	0.626914	-0.202792	1.57964	3.36972	3.02577	2.65837	0.424616	6.2645	13.3702	9.58539	9.74003	0.98856
comp6795_c0_seq1	200.582	277.861	38.2334	172.225	2.2361	25.795	14.654	7.8048	16.0846	1.20641	19.1029	37.9372	17.7689	24.9364	1.39683
comp6823_c0_seq1	114.623	122.389	73.6041	103.539	2.0151	48.0932	41.4114	35.8005	41.7684	1.62085	4.58479	1.34307	3.2629	3.06359	0.48623
comp6835_c0_seq1	534.152	476.39	43.4955	351.346	2.54573	0.751886	0.481182	0.648101	0.627056	-0.202693	0.636121	0.149742	1.14593	0.643932	-0.19116
comp6838_c0_seq1	1.57183	6.66752	0.323855	2.8544	0.455515	0.90917	8.83147	0	3.24688	0.511466	13.5638	41.7098	95.309	50.1942	1.70065
comp6930_c0_seq1	5.8081	30.3453	43.1339	26.4291	1.42208	3.5068	16.0221	16.5882	12.039	1.08059	0.3392	3.14065	1.32771	1.60252	0.204804
comp6964_c0_seq1	2.07801	1.62733	1.77846	1.82793	0.26196	0.118875	1.10944	0.569254	0.599189	-0.222436	1.72858	13.0209	14.0913	9.61361	0.982887
comp6969_c0_seq1	11.8593	10.7798	5.10508	9.24807	0.966051	3.56979	3.6396	0.628481	2.61262	0.417077	1.52674	0.392064	0	0.6396	-0.194091
comp6976_c0_seq1	2.14828	0	0	0.716095	-0.145029	0.798815	1.27804	0	0.692284	-0.159716	22.2811	18.5934	23.4473	21.4406	1.33124
comp6989_c0_seq1	3.66575	3.81674	2.47183	3.3181	0.52089	2.35439	11.0692	7.86245	7.09533	0.850973	26.5367	23.1359	38.4707	29.3811	1.46807
comp7008_c0_seq1	2.81989	0.797444	0	1.20578	0.0812674	0.699029	0.621327	5.30012	2.20682	0.343768	45.1252	52.3507	55.7349	51.0703	1.70817
comp7088_c0_seq1	62.0231	79.1529	47.7356	62.9705	1.79914	37.1076	25.2381	16.536	26.2939	1.41985	0.28382	0.356325	1.21194	0.61736	-0.209462
comp7123_c0_seq1	31.5691	128.043	66.5022	75.3715	1.87721	3.84388	6.78064	7.29207	5.97219	0.776134	1.25079	0.294434	2.25322	1.26615	0.102484
comp7176_c0_seq1	2.46025	5.39199	0.950444	2.93423	0.467494	0.152469	0.609846	0	0.254105	-0.594987	41.1169	100.205	52.0693	64.4636	1.80931
comp7315_c0_seq1	2.471	0	0	0.823665	-0.0842492	0	0.408339	2.93328	1.11387	0.0468352	32.1869	30.6883	20.7458	27.8737	1.44519
comp7345_c0_seq1	38.5596	46.8359	5.03982	30.1451	1.47922	0	0	0	0	NA	0	0.125792	0	0.0419306	-1.37747
comp7364_c0_seq1	35.1392	18.5908	6.13128	19.9538	1.30003	0.257144	0	0.0384808	0.0985415	-1.00638	0.254944	0.240054	0	0.164999	-0.782518
comp7416_c0_seq1	27.832	22.4089	52.1029	34.1146	1.53294	37.441	31.4628	26.3574	31.7538	1.5018	1.21993	3.11784	6.13941	3.49239	0.543123
comp7515_c0_seq1	79.6026	80.1221	55.7665	71.8304	1.85631	55.8635	59.1792	51.0249	55.3559	1.74316	247.477	192.181	250.828	230.162	2.36203
comp7529_c0_seq1	158.744	172.798	35.5068	122.35	2.0876	0.15195	0.0289414	0.207899	0.129597	-0.887406	0.229563	0.148606	0.153164	0.177111	-0.751754
comp7536_c0_seq1	5.11408	5.80616	0.976214	3.96549	0.598296	7.43866	3.35561	1.54003	4.11143	0.613993	25.6555	36.4792	17.7586	26.6311	1.42539
comp7546_c0_seq1	5.53882	3.42901	4.85783	4.60855	0.663565	7.4589	12.6164	4.53145	8.20225	0.913933	29.5804	28.2684	29.2211	29.0233	1.46275
comp7615_c0_seq1	2.15493	1.72065	3.05573	2.31043	0.363694	6.0332	9.04932	15.7999	10.2941	1.01259	103.93	205.576	123.718	144.408	2.15959
comp7659_c0_seq1	57.4545	60.8499	3.79677	40.7004	1.6096	13.7503	15.1338	1.21528	10.0331	1.00144	1.09794	3.10143	0.26046	1.48661	0.172197
comp7720_c0_seq1	30.8998	2.01652	28.0095	20.3086	1.30768	49.3233	8.43868	38.6376	32.1332	1.50695	268.043	343.378	436.132	349.185	2.54306
comp7756_c0_seq2	2.33	1.78846	1.23446	1.78431	0.25147	21.9484	11.7712	6.02573	13.2485	1.12217	77.553	76.4128	24.4526	59.4728	1.77432
comp7794_c0_seq1	2.79023	2.8406	0	1.87694	0.273451	13.7989	13.6945	4.3473	10.6136	1.02586	18.5155	26.474	27.8183	24.2693	1.38506
comp7818_c0_seq1	23.4053	29.3955	21.4879	24.7629	1.3938	28.1568	72.6918	112.566	71.1383	1.8521	6.99307	19.6477	9.63257	12.0911	1.08247
comp7862_c0_seq1	3.32369	0	3.08162	2.1351	0.329419	5.09799	7.62083	8.13758	6.95213	0.842118	8.3729	16.7292	24.1987	16.4336	1.21573
comp7921_c0_seq1	41.4341	19.2731	91.9172	50.8748	1.7065	14.9027	3.1148	39.6273	19.2149	1.28364	0.520138	0	0.485851	0.33533	-0.474528
comp7940_c0_seq1	2.27501	1.75461	1.34229	1.79064	0.253008	3.99898	1.23039	0.736535	1.98864	0.298555	16.8757	28.9084	42.5418	29.4419	1.46897
comp7985_c0_seq1	32.2787	66.3179	111.654	70.0835	1.84562	16.0519	55.8899	84.411	52.1176	1.71698	0.663777	4.1936	4.59444	3.15061	0.498394
comp8001_c0_seq1	35.0325	26.7959	18.4574	26.7619	1.42752	16.3761	13.453	11.1887	13.6726	1.13585	3.28	8.23581	1.63402	4.38327	0.641799
comp8014_c0_seq1	32.3278	32.9252	12.5452	25.9327	1.41385	18.6487	15.8661	9.4136	14.6428	1.16562	3.06659	3.52498	1.36048	2.65068	0.423358
comp8025_c0_seq1	2.09061	1.57656	0	1.22239	0.0872091	1.72749	0	0	0.575829	-0.239707	27.6317	14.4066	10.9701	17.6695	1.24722
comp8052_c0_seq1	3.11174	4.56911	1.77545	3.1521	0.4986	3.29319	1.66134	2.02454	2.32635	0.366676	24.2376	8.41975	24.7437	19.1337	1.2818
comp8141_c0_seq1	2.70099	12.3166	13.1474	9.38834	0.972589	0	5.0214	3.00591	2.67577	0.427449	3.31914	47.4001	53.3849	34.7014	1.54035
comp8159_c0_seq1	108.282	14.4699	93.476	72.0761	1.85779	122.11	3.51814	123.9	83.1759	1.92	3.84907	0.0226517	3.05604	2.30926	0.363472
comp8186_c0_seq1	3.73915	4.05338	1.54081	3.11111	0.492916	8.49665	5.14921	4.25373	5.96653	0.775722	46.5615	10.9605	48.6153	35.3791	1.54875
comp8241_c0_seq1	2.16448	7.73869	8.74409	6.21575	0.793494	14.4871	17.7822	12.3883	14.8859	1.17277	48.1812	81.1456	37.9673	55.7647	1.74636
comp8245_c0_seq1	52.1604	39.132	4.68433	31.9922	1.50504	0.0695793	0	0	0.0231931	-1.63464	0	0.346427	0.0981892	0.148205	-0.829136
comp8282_c0_seq1	1.96479	1.49142	2.10932	1.85517	0.268385	2.92233	3.07598	0.276201	2.0915	0.320458	10.8777	10.8167	14.7594	12.1513	1.08462
comp8300_c0_seq1	3.25206	13.0066	8.61486	8.29117	0.918616	10.0194	17.9649	5.9975	11.3273	1.05413	84.2652	73.538	51.4376	69.747	1.84353
comp8324_c0_seq1	4.49531	1.63445	3.40237	3.17737	0.502068	6.20853	11.4613	7.02431	8.23138	0.915473	26.0647	23.7781	32.1572	27.3333	1.43669
comp8406_c0_seq1	37.368	35.7027	64.9207	45.9971	1.66273	20.0483	41.1972	50.1414	37.129	1.56971	0.787199	2.30603	3.64152	2.24492	0.3512
comp8418_c0_seq1	64.1991	63.6891	21.0332	49.6404	1.69584	7.40444	7.79247	10.882	8.69296	0.939168	8.53202	9.08254	12.1694	9.928	0.996862
comp8432_c0_seq1	15.1415	11.9281	17.2475	14.7724	1.16945	7.2388	9.43676	15.7916	10.8224	1.03432	1.91383	3.80434	1.81605	2.51141	0.399917
comp8433_c0_seq1	102.765	118.555	24.2975	81.8726	1.91314	0.10077	0	0.0120639	0.0376113	-1.42468	0.213137	0.0376291	0.127985	0.12625	-0.898768
comp8461_c0_seq1	56.4089	41.3906	6.56122	34.7869	1.54142	0	0	0	0	NA	0.133787	0.125973	0.142821	0.134194	-0.872268
comp8467_c0_seq1	130.756	105.2	263.846	166.601	2.22168	48.0544	114.745	263.488	142.096	2.15258	6.93864	5.46326	42.9103	18.4374	1.2657
comp8476_c0_seq1	75.0985	135.248	187.108	132.485	2.12217	33.7838	61.0946	61.4101	52.0961	1.71681	16.5135	26.8111	25.2482	22.8576	1.35903
comp8508_c0_seq1	117.007	58.5967	126.142	100.582	2.00252	81.5828	38.0894	166.072	95.248	1.97886	20.9666	10.5653	14.5108	15.3476	1.18604
comp8519_c0_seq2	51.5515	14.436	46.3032	37.4302	1.57322	23.0875	8.81853	26.3847	19.4302	1.28848	0.197967	0.186405	0.493112	0.292495	-0.533882
comp8562_c0_seq1	1.70198	2.37822	0.464124	1.51478	0.180348	1.48909	6.25383	1.96097	3.23463	0.509824	24.9011	29.7486	35.0929	29.9142	1.47588
comp8620_c0_seq1	46.0466	59.9371	34.3701	46.7846	1.6701	54.6006	102.52	83.1264	80.0823	1.90354	374.508	516.36	419.567	436.812	2.64029
comp8641_c0_seq1	210.617	166.814	245.908	207.78	2.3176	28.9871	47.9267	73.9365	50.2834	1.70142	1.47015	2.07643	1.62005	1.72221	0.236087
comp8685_c0_seq1	193.848	263.59	59.99	172.476	2.23673	0.350329	0.74733	0.293584	0.463748	-0.333718	0.625198	0.392455	0.0988758	0.372177	-0.429251
comp8730_c0_seq1	44.0821	8.42213	66.512	39.6721	1.59849	10.9862	8.31978	24.2004	14.5021	1.16143	0	0	0	0	NA
comp8790_c0_seq1	6.03185	5.23769	8.55328	6.60761	0.820044	1.37211	2.42745	2.96942	2.25633	0.353402	0	0	0	0	NA
comp8806_c0_seq1	128.594	84.2136	130.792	114.533	2.05893	61.9619	102.714	75.9032	80.193	1.90414	7.72622	23.1955	14.7028	15.2082	1.18208
comp8871_c0_seq1	2.01134	3.60235	3.5225	3.0454	0.483644	7.14655	16.1758	13.7289	12.3504	1.09168	768.96	918.921	1007.34	898.406	2.95347
comp8892_c0_seq1	38.475	35.1195	46.7125	40.1023	1.60317	2.39993	11.5853	6.0435	6.67623	0.824532	0.0546989	0.824066	0.291961	0.390242	-0.408666
comp8894_c0_seq1	2.69456	1.30629	3.92592	2.64226	0.421975	1.43135	8.77846	6.68293	5.63091	0.750579	15.8939	30.8221	22.8248	23.1803	1.36512
comp8951_c0_seq2	46.1666	15.8503	15.3152	25.7774	1.41124	5.1447	4.8528	2.01114	4.00288	0.602373	54.4999	75.7119	47.3143	59.1753	1.77214
comp8995_c0_seq2	86.394	150.043	61.0199	99.1523	1.9963	90.6554	134.771	60.2051	95.2103	1.97868	1152.48	1161.27	1208.11	1173.96	3.06965
comp9014_c0_seq1	6.88069	9.31846	4.15549	6.78488	0.831542	0	0	0	0	NA	0	0	0	0	NA
comp9024_c0_seq1	124.781	81.6131	2.38543	69.5933	1.84257	0.059792	0.159437	0	0.0730763	-1.13622	0.750885	0.0372121	0.210944	0.333014	-0.477538
comp9033_c0_seq1	114.784	170.415	27.9512	104.383	2.01863	0	0.159846	0.215295	0.125047	-0.902927	0.950919	0.59692	2.03025	1.1927	0.0765299
comp9050_c0_seq1	7.15453	12.6913	3.0152	7.62033	0.881974	4.83696	0.42993	0	1.75563	0.244433	0	0	0	0	NA
comp9069_c0_seq4	25.4277	8.42376	3.46502	12.4388	1.09478	3.62396	0.217971	2.54439	2.12878	0.32813	1.04457	0.373075	0.884389	0.767345	-0.115009
comp9073_c0_seq1	6.89616	6.58845	2.1889	5.22451	0.718045	0	0	0	0	NA	8.36752	8.22387	4.30325	6.96488	0.842914
comp9101_c0_seq1	14.3227	30.4712	7.96774	17.5872	1.2452	4.2606	4.15113	1.17708	3.19627	0.504643	0	0	0.462499	0.154166	-0.812011
comp9118_c0_seq2	447.963	543.039	831.226	607.409	2.78348	420.756	466.08	392.993	426.61	2.63003	20.0212	47.0327	22.9612	30.005	1.47719
comp9128_c0_seq1	11.4203	18.3357	5.80662	11.8542	1.07387	0	0	0	0	NA	0	0	0	0	NA
comp9135_c0_seq1	17.3625	130.17	58.172	68.5681	1.83612	6.06476	9.52051	14.6968	10.094	1.00406	0.452582	0.852297	0.75922	0.688033	-0.162391
comp9155_c0_seq1	12.1081	8.2075	6.93886	9.08483	0.958317	0	0	0	0	NA	0.119632	0.225289	0	0.114974	-0.939402
comp9162_c0_seq1	6.32186	8.92421	7.54298	7.59635	0.880605	7.5531	10.5841	10.5648	9.56733	0.980791	31.635	28.0606	33.2816	30.9924	1.49126
comp9167_c0_seq1	7.54224	8.41505	3.20264	6.38664	0.805273	7.4001	10.8403	5.13496	7.7918	0.891638	54.7689	59.0504	37.5811	50.4668	1.70301
comp9170_c0_seq1	6.75545	16.8919	9.84843	11.1653	1.04787	16.8564	19.5656	11.198	15.8733	1.20067	78.5584	63.9319	59.049	67.1798	1.82724
comp9198_c0_seq1	6.46848	5.90984	4.79079	5.72304	0.757627	0	0	0	0	NA	3.61226	1.27548	4.33818	3.0753	0.487888
comp9200_c0_seq1	50.798	94.9404	171.749	105.829	2.02461	36.3352	97.1219	43.9182	59.1251	1.77177	0.115532	1.22383	0.431665	0.590341	-0.228897
comp9209_c0_seq1	7.91779	1.94055	27.8962	12.5849	1.09985	0.130851	0	0.313302	0.148051	-0.829589	0.518925	0.977234	0.184654	0.560271	-0.251602
comp9210_c0_seq1	16.485	10.5379	12.2275	13.0835	1.11672	0	0.152048	0.136528	0.0961923	-1.01686	0	0	0	0	NA
comp9211_c0_seq1	7.10073	10.1391	3.19906	6.81298	0.833337	0	0.0991619	0.356161	0.151774	-0.818801	0.196638	0	0	0.0655458	-1.18345
comp9212_c0_seq1	10.9176	55.8363	0.574324	22.4428	1.35108	0	0	0	0	NA	0	0	0	0	NA
comp9219_c0_seq1	30.609	31.8154	57.309	39.9111	1.60109	56.4119	49.4187	62.3057	56.0454	1.74854	667.472	540.811	609.832	606.038	2.7825
comp9228_c0_seq1	10.3203	8.66234	2.49395	7.15885	0.854843	0.48989	0.544294	0.195495	0.409893	-0.38733	0	0	0.576104	0.192035	-0.71662
comp9240_c0_seq1	64.9999	49.9852	109.994	74.9932	1.87502	5.33804	7.9078	6.03554	6.42713	0.808017	0	0	0	0	NA
comp9249_c0_seq1	12	6.59582	15.2003	11.2654	1.05175	5.65613	1.34064	12.1885	6.39508	0.805846	0.996931	1.56451	1.77374	1.44506	0.159886
comp9264_c0_seq1	17.3413	69.2066	34.1012	40.2164	1.6044	18.3835	37.2479	29.4444	28.3586	1.45269	3.42433	4.26443	0.707524	2.79876	0.446966
comp9336_c0_seq2	113.395	82.2343	116.642	104.091	2.01741	41.3849	24.6425	65.6969	43.9081	1.64254	15.8419	14.4313	14.2703	14.8478	1.17166
comp9345_c0_seq1	19.728	8.52149	17.5105	15.2533	1.18336	5.94903	5.96363	6.90784	6.2735	0.79751	0.118258	0.222703	0.189365	0.176775	-0.752578
comp9366_c0_seq1	128.48	166.359	95.4246	130.088	2.11424	313.037	206.896	295.297	271.743	2.43416	751.75	508.277	530.304	596.777	2.77581
comp9371_c0_seq1	22.2142	23.8514	5.0351	17.0336	1.23131	0	0.0886348	0.0397938	0.0428095	-1.36846	0.131822	0.0413742	0.0469074	0.0733678	-1.13449
comp9424_c0_seq1	10.3415	8.71835	2.53277	7.19756	0.857185	0.386957	0.193468	0	0.193475	-0.713375	0.127882	0	0	0.0426274	-1.37031
comp9432_c0_seq1	14.6122	0.049389	12.3605	9.00735	0.954597	0.432938	0	0.310982	0.247973	-0.605595	0.228925	0	0	0.0763083	-1.11743
comp9438_c0_seq1	10.8013	10.9416	16.965	12.9026	1.11068	2.5177	7.67259	2.72707	4.30579	0.634053	0	0.59692	0.169188	0.255369	-0.592832
comp9452_c0_seq1	37.3272	69.2249	29.8854	45.4791	1.65781	7.67741	24.9866	18.262	16.9753	1.22982	2.92503	5.88396	5.20421	4.67107	0.669416
comp9466_c0_seq1	9.95581	14.0465	16.1788	13.3937	1.1269	8.79214	12.7416	11.7301	11.0879	1.04485	380.087	528.28	466.652	458.34	2.66119
comp9477_c0_seq1	13.3143	30.2784	14.7449	19.4459	1.28883	21.5909	27.6862	8.06723	19.1148	1.28137	0.727173	0	0	0.242391	-0.615483
comp9504_c0_seq1	29.3188	24.2305	2.81021	18.7865	1.27385	0	0	0	0	NA	0	0	0	0	NA
comp9523_c0_seq1	33.4647	58.9937	15.9167	36.125	1.55781	2.90886	6.67926	4.44976	4.6793	0.670181	2.34991	1.40806	2.73663	2.16486	0.335431
comp9543_c0_seq1	29.9634	43.0045	27.2894	33.4191	1.524	16.0386	18.5792	25.6144	20.0774	1.30271	7.95069	4.54089	12.8009	8.43081	0.925869
comp9545_c0_seq1	30.871	15.1684	18.4086	21.4827	1.33209	14.3511	18.0792	4.30648	12.2456	1.08798	1.24483	1.35966	0	0.868162	-0.0613994
comp9547_c0_seq1	18.3904	35.4445	8.65665	20.8305	1.3187	43.7648	28.8945	17.5487	30.0693	1.47812	144.264	144.306	188.844	159.138	2.20177
comp9550_c0_seq1	53.7994	71.8273	39.6465	55.0911	1.74108	6.6948	8.28836	8.49192	7.82502	0.893486	48.043	64.9786	138.902	83.9746	1.92415
comp9573_c0_seq1	6.87783	20.1573	52.223	26.4194	1.42192	3.37118	13.174	14.3807	10.3086	1.0132	1.17814	3.13507	3.00752	2.44024	0.387433
comp9596_c0_seq2	24.2216	20.0025	29.0673	24.4305	1.38793	18.5241	10.8158	15.9824	15.1074	1.17919	2.23765	4.0549	3.2	3.16418	0.500261
comp9602_c0_seq1	226.137	120.688	138.81	161.878	2.20919	25.1876	4.67942	49.3974	26.4215	1.42196	1.13067	0.256979	1.66484	1.01749	0.00753222
comp9603_c0_seq1	12.0528	14.4946	1.15205	9.23314	0.965349	0.0924057	0	0	0.0308019	-1.51142	1.95446	1.26521	4.62925	2.61631	0.417689
comp9612_c0_seq1	17.0183	29.678	8.54685	18.4144	1.26516	0.439448	0	0.105219	0.181556	-0.74099	1.51039	0	0	0.503463	-0.298033
comp9634_c0_seq1	211.778	97.3132	146.272	151.788	2.18124	282.829	62.3603	1288.22	544.47	2.73597	15.2897	17.9024	86.2038	39.7986	1.59987
comp9636_c0_seq2	34.6613	6.7066	5.58678	15.6516	1.19456	50.8136	7.83815	9.49897	22.7169	1.35635	331.756	312.508	227.131	290.465	2.46309
comp9643_c0_seq2	15.7857	20.0541	7.35554	14.3984	1.15832	0	0	0	0	NA	0	0	0	0	NA
comp9666_c0_seq1	38.7404	32.1237	2.07441	24.3129	1.38584	0.361712	0.385806	0.909368	0.552295	-0.257829	3.0602	0.720368	0.740141	1.5069	0.178086
comp9669_c0_seq1	44.2685	2.12935	17.1333	21.177	1.32587	6.62628	0.248861	0.502785	2.45931	0.390813	0.123373	0	0	0.0411242	-1.3859
comp9702_c0_seq1	45.876	23.0627	75.9787	48.3058	1.684	2.82885	1.1705	2.10205	2.0338	0.308308	0.902646	0.910635	1.65187	1.15505	0.0626012
comp9719_c0_seq1	79.7529	103.002	162.606	115.12	2.06115	64.0898	128.825	122.363	105.093	2.02157	10.3524	29.0998	29.7412	23.0645	1.36294
comp9723_c0_seq1	8.83263	17.8875	25.9549	17.5583	1.24448	20.1297	44.636	24.7963	29.854	1.475	53.3599	64.6834	196.454	104.833	2.0205
comp9729_c0_seq2	7.49863	8.80846	4.67956	6.99555	0.844822	0.214483	2.2877	2.69612	1.73277	0.238741	0	0.533942	0	0.177981	-0.749627
comp9741_c0_seq1	356.427	452.236	74.6178	294.427	2.46898	0	0.3918	0.234539	0.20878	-0.680311	0.194234	0.487707	0	0.227314	-0.643374
comp9742_c0_seq1	9.89015	40.7543	3.60243	18.0823	1.25725	0	0.525335	0.943427	0.489588	-0.31017	0	0	0	0	NA
comp9744_c0_seq1	18.6976	33.7007	36.8623	29.7535	1.47354	37.0544	91.5743	84.0565	70.8951	1.85062	116.987	340.608	395.252	284.282	2.45375
comp9745_c0_seq1	6.94992	10.5243	0	5.82475	0.765277	1.33381	1.92651	0.3992	1.21984	0.086302	17.3381	19.9917	27.2925	21.5408	1.33326
comp9765_c0_seq3	156.466	99.3725	194.261	150.033	2.17619	52.0407	14.1942	79.3636	48.5329	1.68604	8.58802	4.91113	8.0159	7.17168	0.855621
comp9789_c0_seq1	6.31941	8.62905	7.6169	7.52179	0.876321	8.57118	7.87701	7.60883	8.01901	0.904121	544.868	341.816	303.303	396.663	2.59842
comp9795_c0_seq1	6.9206	9.66641	10.7105	9.09918	0.959002	13.1505	24.0297	15.8606	17.6803	1.24749	48.6338	59.8236	61.3345	56.5973	1.7528
comp9811_c0_seq1	233.032	299.594	252.388	261.671	2.41776	167.103	269.833	152.544	196.493	2.29335	8.15775	38.3731	11.8891	19.4733	1.28944
comp9821_c0_seq1	19.5038	39.8854	36.2647	31.8847	1.50358	13.4029	26.3324	10.6448	16.7934	1.22514	0.624107	4.76654	0.888329	2.09299	0.320768
comp9828_c0_seq2	179.747	411.021	176.369	255.713	2.40775	157.553	275.781	147.675	193.67	2.28706	21.2192	63.7647	36.1462	40.3767	1.60613
comp9867_c0_seq1	27.7204	33.6997	14.4804	25.3002	1.40312	0.298769	0	0.357678	0.218816	-0.659921	0.0987376	0.650795	0.316213	0.355249	-0.449468
comp9876_c0_seq1	239.018	250.376	465.887	318.427	2.50301	205.583	238.956	289.546	244.695	2.38862	8.85808	25.6338	14.5625	16.3515	1.21356
comp9893_c0_seq1	29.2644	3.61855	5.05312	12.6454	1.10193	12.2474	0.939796	11.9197	8.36894	0.92267	359.793	405.46	197.452	320.902	2.50637
comp9897_c0_seq1	44.0827	75.1699	14.7167	44.6564	1.64988	2.82865	1.16041	0.390737	1.45993	0.164332	18.0252	32.5906	19.1911	23.269	1.36678
comp9900_c0_seq1	5.8703	7.42952	6.42423	6.57468	0.817875	1.14508	1.0496	3.25579	1.81682	0.259312	0	0.267243	0.201989	0.156411	-0.805733
comp9902_c0_seq1	9.90048	9.52502	4.35312	7.92621	0.899065	0	0	0	0	NA	0.200681	0	0	0.0668936	-1.17462
comp9937_c0_seq1	20.1041	14.2067	17.5735	17.2947	1.23791	19.2275	10.6282	8.51938	12.7917	1.10693	1.67339	4.85471	1.20701	2.57837	0.411345
comp9944_c0_seq1	53.6135	91.7937	117.124	87.5105	1.94206	0.309879	9.77789	8.4707	6.18616	0.791421	0.341364	9.57852	3.13396	4.35128	0.638617
comp9975_c0_seq2	17.8394	54.6091	11.7997	28.0828	1.44844	6.9753	2.0788	3.53675	4.19695	0.622934	1.62721	2.826	1.46686	1.97336	0.295206
comp9998_c0_seq1	38.8277	73.0871	50.7967	54.2372	1.7343	6.26509	8.7114	4.49282	6.48977	0.812229	3.22533	4.3624	1.5173	3.03501	0.48216

## Sheet: Table S4
Table S4. Pathway and enzyme commission prediction of DEGs from KEGG database.
Pathway	Sequences in Pathway	Enzyme	Ezyme ID	Sequences of Enzyme	ID of DEGs
Purine metabolism	57	cyclase	EC:4.6.1.1	2	comp21534_c0_seq1, comp3491_c0_seq1
Purine metabolism	57	cyclase	EC:4.6.1.2	7	comp33734_c0_seq1, comp22555_c0_seq1, comp30128_c0_seq1, comp26106_c0_seq1, comp28092_c0_seq1, comp27085_c0_seq1, comp24868_c0_seq1
Purine metabolism	57	kinase	EC:2.7.4.6	1	comp20161_c0_seq1
Purine metabolism	57	kinase	EC:2.7.4.3	1	comp1778_c0_seq1
Purine metabolism	57	adenylpyrophosphatase	EC:3.6.1.3	32	comp15578_c0_seq1, comp25303_c0_seq1, comp35956_c0_seq1, comp22731_c0_seq2, comp27602_c0_seq1, comp11203_c0_seq1, comp23484_c0_seq1, comp26136_c0_seq1, comp19263_c0_seq1, comp22973_c0_seq1, comp2749_c0_seq1, comp7940_c0_seq1, comp21448_c0_seq1, comp28539_c0_seq1, comp13654_c0_seq2, comp24298_c1_seq2, comp26553_c0_seq1, comp15985_c0_seq1, comp18408_c0_seq2, comp23140_c0_seq2, comp15466_c0_seq1, co…
Purine metabolism	57	diphosphatase	EC:3.6.1.9	1	comp18785_c0_seq1
Purine metabolism	57	kinase	EC:2.7.1.40	1	comp16096_c0_seq1
Purine metabolism	57	nucleosidase	EC:3.2.2.2	1	comp9998_c0_seq1
Purine metabolism	57	nucleosidase	EC:3.2.2.1	1	comp9998_c0_seq1
Purine metabolism	57	nucleosidase	EC:3.2.2.7	1	comp9998_c0_seq1
Purine metabolism	57	kinase	EC:2.7.1.25	1	comp22385_c0_seq3
Purine metabolism	57	phosphatase	EC:3.6.1.15	40	comp14765_c0_seq2, comp15578_c0_seq1, comp25303_c0_seq1, comp35956_c0_seq1, comp22731_c0_seq2, comp27602_c0_seq1, comp25612_c0_seq1, comp11203_c0_seq1, comp498_c0_seq1, comp17635_c0_seq1, comp23484_c0_seq1, comp26136_c0_seq1, comp8014_c0_seq1, comp19263_c0_seq1, comp22973_c0_seq1, comp2749_c0_seq1, comp7940_c0_seq1, comp21448_c0_seq1, comp28539_c0_seq1, comp13654_c0_seq2, comp24953_c0_seq1, comp2…
Purine metabolism	57	(asymmetrical)	EC:3.6.1.17	1	comp18785_c0_seq1
Purine metabolism	57	3'-diphosphatase	EC:3.1.7.2	1	comp18785_c0_seq1
Purine metabolism	57	phosphoribosyldiphosphate 5-amidotransferase	EC:2.4.2.14	1	comp24038_c0_seq1
Purine metabolism	57	phosphoribosyltransferase	EC:2.4.2.7	1	comp17882_c0_seq1
Biosynthesis of antibiotics	49	geranyl-diphosphate synthase	EC:2.5.1.1	2	comp16672_c0_seq1, comp22567_c0_seq2
Biosynthesis of antibiotics	49	synthase	EC:2.3.3.10	1	comp9466_c0_seq1
Biosynthesis of antibiotics	49	2,4-cyclodiphosphate synthase	EC:4.6.1.12	1	comp25635_c0_seq1
Biosynthesis of antibiotics	49	hydroxymethyltransferase	EC:2.1.2.1	1	comp20214_c0_seq2
Biosynthesis of antibiotics	49	kinase	EC:2.7.4.6	1	comp20161_c0_seq1
Biosynthesis of antibiotics	49	aldolase	EC:4.1.2.13	1	comp2557_c0_seq2
Biosynthesis of antibiotics	49	kinase	EC:2.7.4.3	1	comp1778_c0_seq1
Biosynthesis of antibiotics	49	decarboxylase	EC:4.1.1.33	1	comp9789_c0_seq1
Biosynthesis of antibiotics	49	dehydrogenase	EC:1.1.1.1	5	comp4089_c0_seq1, comp24789_c0_seq9, comp35420_c0_seq1, comp6721_c0_seq1, comp8141_c0_seq1
Biosynthesis of antibiotics	49	hydratase	EC:4.2.1.3	2	comp9636_c0_seq2, comp17321_c0_seq1
Biosynthesis of antibiotics	49	synthase (ferredoxin)	EC:1.17.7.1	2	comp9219_c0_seq1, comp24094_c0_seq1
Biosynthesis of antibiotics	49	transaminase	EC:2.6.1.4	1	comp22096_c0_seq9
Biosynthesis of antibiotics	49	Delta-isomerase	EC:5.3.3.2	1	comp20278_c0_seq1
Biosynthesis of antibiotics	49	synthase	EC:2.2.1.7	3	comp29284_c0_seq1, comp6432_c0_seq1, comp4785_c0_seq1
Biosynthesis of antibiotics	49	kinase	EC:2.7.1.40	1	comp16096_c0_seq1
Biosynthesis of antibiotics	49	oxidase	EC:1.1.3.15	1	comp24565_c0_seq1
Biosynthesis of antibiotics	49	kinase	EC:2.7.1.36	1	comp19414_c0_seq1
Biosynthesis of antibiotics	49	reductase	EC:1.1.1.88	1	comp20414_c0_seq2
Biosynthesis of antibiotics	49	dehydrogenase (NAD+)	EC:1.2.1.3	5	comp28311_c0_seq1, comp6517_c0_seq1, comp24721_c0_seq2, comp3600_c0_seq1, comp4869_c0_seq1
Biosynthesis of antibiotics	49	phosphohexokinase	EC:2.7.1.11	1	comp18083_c0_seq2
Biosynthesis of antibiotics	49	dehydratase	EC:4.2.1.51	1	comp17025_c0_seq2
Biosynthesis of antibiotics	49	C-acetyltransferase	EC:2.3.1.9	2	comp9466_c0_seq1, comp21547_c0_seq2
Biosynthesis of antibiotics	49	diphosphate synthase	EC:2.5.1.10	1	comp22567_c0_seq2
Biosynthesis of antibiotics	49	synthase	EC:5.5.1.4	2	comp5269_c0_seq1, comp23910_c1_seq1
Biosynthesis of antibiotics	49	ligase	EC:6.2.1.1	1	comp22059_c0_seq1
Biosynthesis of antibiotics	49	reductase (NADPH)	EC:1.1.1.34	1	comp20414_c0_seq2
Biosynthesis of antibiotics	49	C-acyltransferase	EC:2.3.1.16	2	comp9466_c0_seq1, comp21547_c0_seq2
Biosynthesis of antibiotics	49	diphosphate synthase	EC:2.5.1.29	1	comp16672_c0_seq1
Biosynthesis of antibiotics	49	phosphatase	EC:3.1.3.25	4	comp1976_c0_seq1, comp16462_c0_seq1, comp8300_c0_seq1, comp20208_c0_seq2
Biosynthesis of antibiotics	49	dehydrogenase (NADP+)	EC:1.1.1.49	1	comp26432_c0_seq1
Biosynthesis of antibiotics	49	5'-diphospho)-2-C-methyl-D-erythritol kinase	EC:2.7.1.148	2	comp33778_c0_seq1, comp34213_c0_seq1
Biosynthesis of antibiotics	49	citrate synthase	EC:2.3.3.8	2	comp18893_c0_seq2, comp23529_c0_seq1
Biosynthesis of antibiotics	49	phosphoribosyldiphosphate 5-amidotransferase	EC:2.4.2.14	1	comp24038_c0_seq1
Biosynthesis of antibiotics	49	dehydratase	EC:4.2.1.91	1	comp17025_c0_seq2
Biosynthesis of antibiotics	49	reductoisomerase	EC:1.1.1.267	1	comp23478_c0_seq1
Thiamine metabolism	43	synthase	EC:2.2.1.7	3	comp29284_c0_seq1, comp6432_c0_seq1, comp4785_c0_seq1
Thiamine metabolism	43	phosphatase	EC:3.6.1.15	40	comp14765_c0_seq2, comp15578_c0_seq1, comp25303_c0_seq1, comp35956_c0_seq1, comp22731_c0_seq2, comp27602_c0_seq1, comp25612_c0_seq1, comp11203_c0_seq1, comp498_c0_seq1, comp17635_c0_seq1, comp23484_c0_seq1, comp26136_c0_seq1, comp8014_c0_seq1, comp19263_c0_seq1, comp22973_c0_seq1, comp2749_c0_seq1, comp7940_c0_seq1, comp21448_c0_seq1, comp28539_c0_seq1, comp13654_c0_seq2, comp24953_c0_seq1, comp2…
Starch and sucrose metabolism	42	levan hydrolase	EC:3.2.1.65	1	comp13557_c1_seq1
Starch and sucrose metabolism	42	endo-1,4-beta-D-glucanase	EC:3.2.1.4	1	comp22874_c0_seq1
Starch and sucrose metabolism	42	saccharogen amylase	EC:3.2.1.2	3	comp1518_c0_seq1, comp9264_c0_seq1, comp11425_c0_seq1
Starch and sucrose metabolism	42	glycogenase	EC:3.2.1.1	3	comp20495_c0_seq1, comp20257_c0_seq1, comp18535_c0_seq2
Starch and sucrose metabolism	42	diphosphatase	EC:3.6.1.9	1	comp18785_c0_seq1
Starch and sucrose metabolism	42	alpha-glucosidase	EC:3.2.1.48	2	comp9249_c0_seq1, comp13557_c1_seq1
Starch and sucrose metabolism	42	synthase	EC:2.4.2.24	2	comp8418_c0_seq1, comp6439_c0_seq1
Starch and sucrose metabolism	42	trehalose 6-phosphatase	EC:3.1.3.12	1	comp40358_c0_seq1
Starch and sucrose metabolism	42	gentiobiase	EC:3.2.1.21	5	comp23643_c0_seq3, comp18185_c0_seq4, comp1646_c0_seq1, comp23729_c0_seq1, comp13856_c0_seq1
Starch and sucrose metabolism	42	pectin demethoxylase	EC:3.1.1.11	7	comp8159_c0_seq1, comp4050_c0_seq1, comp3850_c0_seq1, comp22177_c0_seq2, comp4265_c0_seq1, comp4247_c0_seq1, comp15424_c0_seq1
Starch and sucrose metabolism	42	invertase	EC:3.2.1.26	2	comp9249_c0_seq1, comp13557_c1_seq1
Starch and sucrose metabolism	42	beta-glucuronide glucuronohydrolase glucuronidase	EC:3.2.1.31	1	comp22677_c0_seq1
Starch and sucrose metabolism	42	endo-1,3-beta-D-glucosidase	EC:3.2.1.39	1	comp13856_c0_seq1
Starch and sucrose metabolism	42	4-alpha-galacturonosyltransferase	EC:2.4.1.43	2	comp9897_c0_seq1, comp19880_c0_seq2
Starch and sucrose metabolism	42	1,4-beta-xylosidase	EC:3.2.1.37	4	comp20882_c0_seq1, comp5719_c0_seq1, comp22098_c0_seq2, comp22133_c0_seq1
Starch and sucrose metabolism	42	1-naphthol glucuronyltransferase	EC:2.4.1.17	5	comp4824_c0_seq1, comp8418_c0_seq1, comp11454_c0_seq1, comp29509_c0_seq1, comp2445_c0_seq1
Starch and sucrose metabolism	42	synthase (UDP-forming)	EC:2.4.1.15	1	comp40358_c0_seq1
Starch and sucrose metabolism	42	synthase (UDP-forming)	EC:2.4.1.12	4	comp19116_c0_seq1, comp25723_c0_seq1, comp8433_c0_seq1, comp7529_c0_seq1
Starch and sucrose metabolism	42	pectin depolymerase	EC:3.2.1.15	2	comp22121_c0_seq1, comp20404_c0_seq2
Phenylpropanoid biosynthesis	36	dehydrogenase	EC:1.2.1.68	4	comp28311_c0_seq1, comp6517_c0_seq1, comp3600_c0_seq1, comp4869_c0_seq1
Phenylpropanoid biosynthesis	36	dehydrogenase	EC:1.1.1.195	3	comp17391_c0_seq2, comp24914_c0_seq1, comp8141_c0_seq1
Phenylpropanoid biosynthesis	36	O-sinapoyltransferase	EC:2.3.1.92	1	comp37818_c0_seq1
Phenylpropanoid biosynthesis	36	O-hydroxycinnamoyltransferase	EC:2.3.1.99	2	comp33430_c0_seq1, comp12661_c0_seq2
Phenylpropanoid biosynthesis	36	O-methyltransferase	EC:2.1.1.68	3	comp20275_c0_seq2, comp29213_c0_seq1, comp6795_c0_seq1
Phenylpropanoid biosynthesis	36	O-methyltransferase	EC:2.1.1.104	2	comp22892_c0_seq1, comp24896_c0_seq1
Phenylpropanoid biosynthesis	36	lactoperoxidase	EC:1.11.1.7	10	comp21927_c0_seq1, comp17462_c0_seq1, comp19932_c0_seq1, comp8951_c0_seq2, comp24999_c0_seq1, comp7515_c0_seq1, comp19297_c0_seq2, comp22133_c0_seq1, comp22317_c0_seq1, comp25175_c0_seq1
Phenylpropanoid biosynthesis	36	ammonia-lyase	EC:4.3.1.24	1	comp24142_c0_seq2
Phenylpropanoid biosynthesis	36	ammonia-lyase	EC:4.3.1.25	1	comp24142_c0_seq2
Phenylpropanoid biosynthesis	36	reductase	EC:1.2.1.44	2	comp20354_c0_seq1, comp8141_c0_seq1
Phenylpropanoid biosynthesis	36	4-monooxygenase	EC:1.14.13.11	2	comp24983_c0_seq1, comp25105_c0_seq1
Phenylpropanoid biosynthesis	36	glucosyltransferase	EC:2.4.1.111	1	comp29509_c0_seq1
Phenylpropanoid biosynthesis	36	O-hydroxycinnamoyltransferase	EC:2.3.1.133	2	comp33430_c0_seq1, comp12661_c0_seq2
Phenylpropanoid biosynthesis	36	beta-glucosidase	EC:3.2.1.126	3	comp23643_c0_seq3, comp18185_c0_seq4, comp23729_c0_seq1
Phenylpropanoid biosynthesis	36	1-glucosyltransferase	EC:2.4.1.120	1	comp11991_c0_seq1
Phenylpropanoid biosynthesis	36	gentiobiase	EC:3.2.1.21	5	comp23643_c0_seq3, comp18185_c0_seq4, comp1646_c0_seq1, comp23729_c0_seq1, comp13856_c0_seq1
Flavonoid biosynthesis	28	synthase	EC:2.3.1.74	4	comp12347_c0_seq1, comp24553_c0_seq2, comp10846_c0_seq1, comp35911_c0_seq1
Flavonoid biosynthesis	28	O-methyltransferase	EC:2.1.1.104	2	comp22892_c0_seq1, comp24896_c0_seq1
Flavonoid biosynthesis	28	3'-monooxygenase	EC:1.14.13.21	9	comp36969_c0_seq1, comp8641_c0_seq1, comp34930_c0_seq1, comp23430_c0_seq3, comp21559_c0_seq2, comp40779_c0_seq1, comp40256_c0_seq1, comp15982_c0_seq1, comp24834_c0_seq1
Flavonoid biosynthesis	28	4-monooxygenase	EC:1.14.13.11	2	comp24983_c0_seq1, comp25105_c0_seq1
Flavonoid biosynthesis	28	synthase	EC:1.14.11.23	3	comp19404_c0_seq1, comp23403_c0_seq3, comp38418_c0_seq1
Flavonoid biosynthesis	28	synthase	EC:1.14.11.22	4	comp23106_c0_seq1, comp9669_c0_seq1, comp38418_c0_seq1, comp9636_c0_seq2
Flavonoid biosynthesis	28	reductase	EC:1.3.1.77	2	comp16408_c0_seq1, comp9547_c0_seq1
Flavonoid biosynthesis	28	4-reductase	EC:1.1.1.219	3	comp16408_c0_seq1, comp9547_c0_seq1, comp8141_c0_seq1
Flavonoid biosynthesis	28	3-dioxygenase	EC:1.14.11.9	2	comp23106_c0_seq1, comp9669_c0_seq1
Flavonoid biosynthesis	28	O-hydroxycinnamoyltransferase	EC:2.3.1.133	2	comp33430_c0_seq1, comp12661_c0_seq2
Drug metabolism - other enzymes	24	beta-glucuronide glucuronohydrolase glucuronidase	EC:3.2.1.31	1	comp22677_c0_seq1
Drug metabolism - other enzymes	24	ali-esterase	EC:3.1.1.1	18	comp22616_c1_seq1, comp8159_c0_seq1, comp16117_c0_seq1, comp23363_c0_seq1, comp18884_c0_seq1, comp3850_c0_seq1, comp22177_c0_seq2, comp7546_c0_seq1, comp27902_c0_seq1, comp4247_c0_seq1, comp15424_c0_seq1, comp2337_c0_seq1, comp26675_c0_seq1, comp4050_c0_seq1, comp4265_c0_seq1, comp23999_c0_seq1, comp19695_c0_seq1, comp16515_c0_seq2
Drug metabolism - other enzymes	24	1-naphthol glucuronyltransferase	EC:2.4.1.17	5	comp4824_c0_seq1, comp8418_c0_seq1, comp11454_c0_seq1, comp29509_c0_seq1, comp2445_c0_seq1
Aminobenzoate degradation	23	phosphatase	EC:3.1.3.2	10	comp15101_c0_seq1, comp28493_c0_seq1, comp35872_c0_seq1, comp17813_c0_seq1, comp26907_c0_seq1, comp31627_c0_seq1, comp21677_c0_seq1, comp22992_c0_seq1, comp26650_c0_seq1, comp22082_c0_seq1
Aminobenzoate degradation	23	nitrophenyl phosphatase	EC:3.1.3.41	22	comp14919_c0_seq1, comp26222_c0_seq1, comp28493_c0_seq1, comp35872_c0_seq1, comp17813_c0_seq1, comp31627_c0_seq1, comp21677_c0_seq1, comp8300_c0_seq1, comp22992_c0_seq1, comp26650_c0_seq1, comp40358_c0_seq1, comp22082_c0_seq1, comp29783_c0_seq1, comp15101_c0_seq1, comp16462_c0_seq1, comp19946_c0_seq1, comp20208_c0_seq2, comp1976_c0_seq1, comp26907_c0_seq1, comp10540_c0_seq1, comp9795_c0_seq1, com…
Aminobenzoate degradation	23	ligase	EC:6.2.1.25	1	comp22059_c0_seq1
Pentose and glucuronate interconversions	22	lyase	EC:4.2.2.2	2	comp22021_c0_seq3, comp18920_c0_seq4
Pentose and glucuronate interconversions	22	dehydrogenase (NAD+)	EC:1.2.1.3	5	comp28311_c0_seq1, comp6517_c0_seq1, comp24721_c0_seq2, comp3600_c0_seq1, comp4869_c0_seq1
Pentose and glucuronate interconversions	22	pectin demethoxylase	EC:3.1.1.11	7	comp8159_c0_seq1, comp4050_c0_seq1, comp3850_c0_seq1, comp22177_c0_seq2, comp4265_c0_seq1, comp4247_c0_seq1, comp15424_c0_seq1
Pentose and glucuronate interconversions	22	beta-glucuronide glucuronohydrolase glucuronidase	EC:3.2.1.31	1	comp22677_c0_seq1
Pentose and glucuronate interconversions	22	1-naphthol glucuronyltransferase	EC:2.4.1.17	5	comp4824_c0_seq1, comp8418_c0_seq1, comp11454_c0_seq1, comp29509_c0_seq1, comp2445_c0_seq1
Pentose and glucuronate interconversions	22	pectin depolymerase	EC:3.2.1.15	2	comp22121_c0_seq1, comp20404_c0_seq2
Terpenoid backbone biosynthesis	17	geranyl-diphosphate synthase	EC:2.5.1.1	2	comp16672_c0_seq1, comp22567_c0_seq2
Terpenoid backbone biosynthesis	17	synthase	EC:2.3.3.10	1	comp9466_c0_seq1
Terpenoid backbone biosynthesis	17	2,4-cyclodiphosphate synthase	EC:4.6.1.12	1	comp25635_c0_seq1
Terpenoid backbone biosynthesis	17	decarboxylase	EC:4.1.1.33	1	comp9789_c0_seq1
Terpenoid backbone biosynthesis	17	synthase (ferredoxin)	EC:1.17.7.1	2	comp9219_c0_seq1, comp24094_c0_seq1
Terpenoid backbone biosynthesis	17	Delta-isomerase	EC:5.3.3.2	1	comp20278_c0_seq1
Terpenoid backbone biosynthesis	17	synthase	EC:2.2.1.7	3	comp29284_c0_seq1, comp6432_c0_seq1, comp4785_c0_seq1
Terpenoid backbone biosynthesis	17	kinase	EC:2.7.1.36	1	comp19414_c0_seq1
Terpenoid backbone biosynthesis	17	reductase	EC:1.1.1.88	1	comp20414_c0_seq2
Terpenoid backbone biosynthesis	17	C-acetyltransferase	EC:2.3.1.9	2	comp9466_c0_seq1, comp21547_c0_seq2
Terpenoid backbone biosynthesis	17	diphosphate synthase	EC:2.5.1.10	1	comp22567_c0_seq2
Terpenoid backbone biosynthesis	17	reductase (NADPH)	EC:1.1.1.34	1	comp20414_c0_seq2
Terpenoid backbone biosynthesis	17	diphosphate synthase	EC:2.5.1.29	1	comp16672_c0_seq1
Terpenoid backbone biosynthesis	17	5'-diphospho)-2-C-methyl-D-erythritol kinase	EC:2.7.1.148	2	comp33778_c0_seq1, comp34213_c0_seq1
Terpenoid backbone biosynthesis	17	reductoisomerase	EC:1.1.1.267	1	comp23478_c0_seq1
Fatty acid degradation	17	1-monooxygenase	EC:1.14.15.3	3	comp36521_c0_seq1, comp25462_c0_seq1, comp25149_c0_seq1
Fatty acid degradation	17	dehydrogenase	EC:1.1.1.1	5	comp4089_c0_seq1, comp24789_c0_seq9, comp35420_c0_seq1, comp6721_c0_seq1, comp8141_c0_seq1
Fatty acid degradation	17	dehydrogenase (NAD+)	EC:1.2.1.3	5	comp28311_c0_seq1, comp6517_c0_seq1, comp24721_c0_seq2, comp3600_c0_seq1, comp4869_c0_seq1
Fatty acid degradation	17	C-acetyltransferase	EC:2.3.1.9	2	comp9466_c0_seq1, comp21547_c0_seq2
Fatty acid degradation	17	ligase	EC:6.2.1.3	1	comp23257_c0_seq2
Fatty acid degradation	17	C-acyltransferase	EC:2.3.1.16	2	comp9466_c0_seq1, comp21547_c0_seq2
Fatty acid degradation	17	oxidase	EC:1.3.3.6	1	comp35248_c0_seq1
Drug metabolism - cytochrome P450	16	dehydrogenase	EC:1.1.1.1	5	comp4089_c0_seq1, comp24789_c0_seq9, comp35420_c0_seq1, comp6721_c0_seq1, comp8141_c0_seq1
Drug metabolism - cytochrome P450	16	dehydrogenase [NAD(P)+]	EC:1.2.1.5	5	comp28311_c0_seq1, comp6517_c0_seq1, comp24721_c0_seq2, comp3600_c0_seq1, comp4869_c0_seq1
Drug metabolism - cytochrome P450	16	transferase	EC:2.5.1.18	1	comp8951_c0_seq2
Drug metabolism - cytochrome P450	16	1-naphthol glucuronyltransferase	EC:2.4.1.17	5	comp4824_c0_seq1, comp8418_c0_seq1, comp11454_c0_seq1, comp29509_c0_seq1, comp2445_c0_seq1
Metabolism of xenobiotics by cytochrome P450	16	dehydrogenase	EC:1.1.1.1	5	comp4089_c0_seq1, comp24789_c0_seq9, comp35420_c0_seq1, comp6721_c0_seq1, comp8141_c0_seq1
Metabolism of xenobiotics by cytochrome P450	16	dehydrogenase [NAD(P)+]	EC:1.2.1.5	5	comp28311_c0_seq1, comp6517_c0_seq1, comp24721_c0_seq2, comp3600_c0_seq1, comp4869_c0_seq1
Metabolism of xenobiotics by cytochrome P450	16	transferase	EC:2.5.1.18	1	comp8951_c0_seq2
Metabolism of xenobiotics by cytochrome P450	16	1-naphthol glucuronyltransferase	EC:2.4.1.17	5	comp4824_c0_seq1, comp8418_c0_seq1, comp11454_c0_seq1, comp29509_c0_seq1, comp2445_c0_seq1
Amino sugar and nucleotide sugar metabolism	15	isomerase	EC:5.3.1.8	2	comp10144_c0_seq1, comp20316_c0_seq1
Amino sugar and nucleotide sugar metabolism	15	end alpha-L-arabinofuranosidase	EC:3.2.1.55	2	comp20882_c0_seq1, comp22098_c0_seq2
Amino sugar and nucleotide sugar metabolism	15	synthase	EC:2.4.2.24	2	comp8418_c0_seq1, comp6439_c0_seq1
Amino sugar and nucleotide sugar metabolism	15	mannose phosphomutase	EC:5.4.2.8	1	comp22008_c0_seq3
Amino sugar and nucleotide sugar metabolism	15	4-alpha-galacturonosyltransferase	EC:2.4.1.43	2	comp9897_c0_seq1, comp19880_c0_seq2
Amino sugar and nucleotide sugar metabolism	15	1,4-beta-xylosidase	EC:3.2.1.37	4	comp20882_c0_seq1, comp5719_c0_seq1, comp22098_c0_seq2, comp22133_c0_seq1
Amino sugar and nucleotide sugar metabolism	15	3,5-epimerase	EC:5.1.3.18	1	comp25355_c0_seq1
Amino sugar and nucleotide sugar metabolism	15	chitodextrinase	EC:3.2.1.14	3	comp24928_c0_seq1, comp24916_c0_seq1, comp24991_c0_seq1
Glycolysis / Gluconeogenesis	14	aldolase	EC:4.1.2.13	1	comp2557_c0_seq2
Glycolysis / Gluconeogenesis	14	dehydrogenase	EC:1.1.1.1	5	comp4089_c0_seq1, comp24789_c0_seq9, comp35420_c0_seq1, comp6721_c0_seq1, comp8141_c0_seq1
Glycolysis / Gluconeogenesis	14	kinase	EC:2.7.1.40	1	comp16096_c0_seq1
Glycolysis / Gluconeogenesis	14	dehydrogenase [NAD(P)+]	EC:1.2.1.5	5	comp28311_c0_seq1, comp6517_c0_seq1, comp24721_c0_seq2, comp3600_c0_seq1, comp4869_c0_seq1
Glycolysis / Gluconeogenesis	14	dehydrogenase (NAD+)	EC:1.2.1.3	5	comp28311_c0_seq1, comp6517_c0_seq1, comp24721_c0_seq2, comp3600_c0_seq1, comp4869_c0_seq1
Glycolysis / Gluconeogenesis	14	phosphohexokinase	EC:2.7.1.11	1	comp18083_c0_seq2
Glycolysis / Gluconeogenesis	14	ligase	EC:6.2.1.1	1	comp22059_c0_seq1
Ascorbate and aldarate metabolism	14	dehydrogenase (NAD+)	EC:1.2.1.3	5	comp28311_c0_seq1, comp6517_c0_seq1, comp24721_c0_seq2, comp3600_c0_seq1, comp4869_c0_seq1
Ascorbate and aldarate metabolism	14	peroxidase	EC:1.11.1.11	1	comp17462_c0_seq1
Ascorbate and aldarate metabolism	14	1-naphthol glucuronyltransferase	EC:2.4.1.17	5	comp4824_c0_seq1, comp8418_c0_seq1, comp11454_c0_seq1, comp29509_c0_seq1, comp2445_c0_seq1
Ascorbate and aldarate metabolism	14	3,5-epimerase	EC:5.1.3.18	1	comp25355_c0_seq1
Ascorbate and aldarate metabolism	14	oxygenase	EC:1.13.99.1	2	comp27354_c0_seq1, comp20860_c0_seq2
alpha-Linolenic acid metabolism	13	cyclase	EC:5.3.99.6	1	comp25207_c0_seq1
alpha-Linolenic acid metabolism	13	dehydrogenase	EC:1.1.1.1	5	comp4089_c0_seq1, comp24789_c0_seq9, comp35420_c0_seq1, comp6721_c0_seq1, comp8141_c0_seq1
alpha-Linolenic acid metabolism	13	C-acyltransferase	EC:2.3.1.16	2	comp9466_c0_seq1, comp21547_c0_seq2
alpha-Linolenic acid metabolism	13	13S-lipoxygenase	EC:1.13.11.12	3	comp24275_c0_seq1, comp15994_c0_seq1, comp23340_c0_seq2
alpha-Linolenic acid metabolism	13	A1	EC:3.1.1.32	1	comp22616_c1_seq1
alpha-Linolenic acid metabolism	13	oxidase	EC:1.3.3.6	1	comp35248_c0_seq1
Retinol metabolism	13	1-monooxygenase	EC:1.14.15.3	3	comp36521_c0_seq1, comp25462_c0_seq1, comp25149_c0_seq1
Retinol metabolism	13	dehydrogenase	EC:1.1.1.1	5	comp4089_c0_seq1, comp24789_c0_seq9, comp35420_c0_seq1, comp6721_c0_seq1, comp8141_c0_seq1
Retinol metabolism	13	1-naphthol glucuronyltransferase	EC:2.4.1.17	5	comp4824_c0_seq1, comp8418_c0_seq1, comp11454_c0_seq1, comp29509_c0_seq1, comp2445_c0_seq1
Flavone and flavonol biosynthesis	13	3'-O-methyltransferase	EC:2.1.1.42	3	comp20275_c0_seq2, comp29213_c0_seq1, comp6795_c0_seq1
Flavone and flavonol biosynthesis	13	3-O-methyltransferase	EC:2.1.1.76	3	comp20275_c0_seq2, comp29213_c0_seq1, comp6795_c0_seq1
Flavone and flavonol biosynthesis	13	3'-monooxygenase	EC:1.14.13.21	9	comp36969_c0_seq1, comp8641_c0_seq1, comp34930_c0_seq1, comp23430_c0_seq3, comp21559_c0_seq2, comp40779_c0_seq1, comp40256_c0_seq1, comp15982_c0_seq1, comp24834_c0_seq1
Flavone and flavonol biosynthesis	13	beta-glucuronide glucuronohydrolase glucuronidase	EC:3.2.1.31	1	comp22677_c0_seq1
Cyanoamino acid metabolism	13	hydroxymethyltransferase	EC:2.1.2.1	1	comp20214_c0_seq2
Cyanoamino acid metabolism	13	lyase	EC:4.1.2.10	5	comp10153_c0_seq1, comp11795_c0_seq2, comp27902_c0_seq1, comp23363_c0_seq1, comp32547_c0_seq1
Cyanoamino acid metabolism	13	ligase	EC:6.3.1.1	1	comp24551_c0_seq49
Cyanoamino acid metabolism	13	beta-glucosidase	EC:3.2.1.117	3	comp23643_c0_seq3, comp18185_c0_seq4, comp23729_c0_seq1
Cyanoamino acid metabolism	13	glutamyl transpeptidase	EC:2.3.2.2	1	comp22096_c0_seq9
Cyanoamino acid metabolism	13	gentiobiase	EC:3.2.1.21	5	comp23643_c0_seq3, comp18185_c0_seq4, comp1646_c0_seq1, comp23729_c0_seq1, comp13856_c0_seq1
Arginine and proline metabolism	11	decarboxylase	EC:4.1.1.50	1	comp8892_c0_seq1
Arginine and proline metabolism	11	dehydrogenase (NAD+)	EC:1.2.1.3	5	comp28311_c0_seq1, comp6517_c0_seq1, comp24721_c0_seq2, comp3600_c0_seq1, comp4869_c0_seq1
Arginine and proline metabolism	11	dioxygenase	EC:1.14.11.2	1	comp35608_c0_seq1
Arginine and proline metabolism	11	synthase	EC:2.5.1.16	4	comp17098_c0_seq2, comp12114_c0_seq1, comp19006_c0_seq5, comp38095_c0_seq1
Arginine and proline metabolism	11	synthase	EC:2.5.1.22	4	comp17098_c0_seq2, comp12114_c0_seq1, comp19006_c0_seq5, comp38095_c0_seq1
Inositol phosphate metabolism	11	5-phosphatase	EC:3.1.3.36	3	comp29783_c0_seq1, comp9795_c0_seq1, comp1962_c0_seq1
Inositol phosphate metabolism	11	synthase	EC:5.5.1.4	2	comp5269_c0_seq1, comp23910_c1_seq1
Inositol phosphate metabolism	11	phosphatase	EC:3.1.3.25	4	comp1976_c0_seq1, comp16462_c0_seq1, comp8300_c0_seq1, comp20208_c0_seq2
Inositol phosphate metabolism	11	oxygenase	EC:1.13.99.1	2	comp27354_c0_seq1, comp20860_c0_seq2
Glycerolipid metabolism	11	dehydrogenase (NAD+)	EC:1.2.1.3	5	comp28311_c0_seq1, comp6517_c0_seq1, comp24721_c0_seq2, comp3600_c0_seq1, comp4869_c0_seq1
Glycerolipid metabolism	11	melibiase	EC:3.2.1.22	4	comp21515_c0_seq1, comp40004_c0_seq1, comp23492_c0_seq3, comp24267_c0_seq7
Glycerolipid metabolism	11	lipase	EC:3.1.1.23	1	comp22616_c1_seq1
Glycerolipid metabolism	11	galactolipid lipase	EC:3.1.1.26	1	comp22616_c1_seq1
Glycerolipid metabolism	11	O-acyltransferase	EC:2.3.1.22	1	comp16117_c0_seq1
Glycerolipid metabolism	11	lipase	EC:3.1.1.3	1	comp22616_c1_seq1
Phosphatidylinositol signaling system	11	kinase C	EC:2.7.11.13	4	comp20889_c0_seq1, comp20930_c0_seq2, comp21684_c0_seq5, comp17194_c0_seq1
Phosphatidylinositol signaling system	11	5-phosphatase	EC:3.1.3.36	3	comp29783_c0_seq1, comp9795_c0_seq1, comp1962_c0_seq1
Phosphatidylinositol signaling system	11	phosphatase	EC:3.1.3.25	4	comp1976_c0_seq1, comp16462_c0_seq1, comp8300_c0_seq1, comp20208_c0_seq2
Glycine, serine and threonine metabolism	11	hydroxymethyltransferase	EC:2.1.2.1	1	comp20214_c0_seq2
Glycine, serine and threonine metabolism	11	dehydrogenase	EC:1.1.1.1	5	comp4089_c0_seq1, comp24789_c0_seq9, comp35420_c0_seq1, comp6721_c0_seq1, comp8141_c0_seq1
Glycine, serine and threonine metabolism	11	transaminase	EC:2.6.1.4	1	comp22096_c0_seq9
Glycine, serine and threonine metabolism	11	transaminase	EC:2.6.1.44	2	comp22096_c0_seq9, comp18812_c0_seq1
Glycine, serine and threonine metabolism	11	dehydrogenase	EC:1.2.1.8	3	comp3600_c0_seq1, comp4869_c0_seq1, comp6517_c0_seq1
Pyruvate metabolism	10	kinase	EC:2.7.1.40	1	comp16096_c0_seq1
Pyruvate metabolism	10	dehydrogenase (NAD+)	EC:1.2.1.3	5	comp28311_c0_seq1, comp6517_c0_seq1, comp24721_c0_seq2, comp3600_c0_seq1, comp4869_c0_seq1
Pyruvate metabolism	10	C-acetyltransferase	EC:2.3.1.9	2	comp9466_c0_seq1, comp21547_c0_seq2
Pyruvate metabolism	10	ligase	EC:6.2.1.1	1	comp22059_c0_seq1
Pyruvate metabolism	10	lyase	EC:4.4.1.5	1	comp26218_c0_seq1
Tyrosine metabolism	10	dehydrogenase	EC:1.1.1.1	5	comp4089_c0_seq1, comp24789_c0_seq9, comp35420_c0_seq1, comp6721_c0_seq1, comp8141_c0_seq1
Tyrosine metabolism	10	dehydrogenase [NAD(P)+]	EC:1.2.1.5	5	comp28311_c0_seq1, comp6517_c0_seq1, comp24721_c0_seq2, comp3600_c0_seq1, comp4869_c0_seq1
Glyoxylate and dicarboxylate metabolism	10	hydroxymethyltransferase	EC:2.1.2.1	1	comp20214_c0_seq2
Glyoxylate and dicarboxylate metabolism	10	hydratase	EC:4.2.1.3	2	comp9636_c0_seq2, comp17321_c0_seq1
Glyoxylate and dicarboxylate metabolism	10	transaminase	EC:2.6.1.4	1	comp22096_c0_seq9
Glyoxylate and dicarboxylate metabolism	10	oxidase	EC:1.1.3.15	1	comp24565_c0_seq1
Glyoxylate and dicarboxylate metabolism	10	decarboxylase	EC:4.1.1.2	2	comp22350_c0_seq6, comp14517_c0_seq1
Glyoxylate and dicarboxylate metabolism	10	C-acetyltransferase	EC:2.3.1.9	2	comp9466_c0_seq1, comp21547_c0_seq2
Glyoxylate and dicarboxylate metabolism	10	ligase	EC:6.2.1.8	1	comp22059_c0_seq1
Other glycan degradation	10	psychosine hydrolase	EC:3.2.1.45	2	comp9167_c0_seq1, comp3710_c0_seq1
Other glycan degradation	10	alpha-fucosidase	EC:3.2.1.51	1	comp9545_c0_seq1
Other glycan degradation	10	mannanase	EC:3.2.1.25	6	comp23643_c0_seq3, comp18185_c0_seq4, comp18623_c0_seq1, comp22657_c0_seq2, comp23729_c0_seq1, comp18687_c0_seq1
Other glycan degradation	10	beta-galactosidase	EC:3.2.1.23	1	comp23249_c0_seq1
Galactose metabolism	10	phosphohexokinase	EC:2.7.1.11	1	comp18083_c0_seq2
Galactose metabolism	10	3-alpha-galactosyltransferase	EC:2.4.1.123	2	comp2445_c0_seq1, comp25523_c0_seq1
Galactose metabolism	10	galactosyltransferase	EC:2.4.1.82	1	comp21515_c0_seq1
Galactose metabolism	10	invertase	EC:3.2.1.26	2	comp9249_c0_seq1, comp13557_c1_seq1
Galactose metabolism	10	melibiase	EC:3.2.1.22	4	comp21515_c0_seq1, comp40004_c0_seq1, comp23492_c0_seq3, comp24267_c0_seq7
Galactose metabolism	10	beta-galactosidase	EC:3.2.1.23	1	comp23249_c0_seq1
Phenylalanine metabolism	10	O-methyltransferase	EC:2.1.1.104	2	comp22892_c0_seq1, comp24896_c0_seq1
Phenylalanine metabolism	10	ammonia-lyase	EC:4.3.1.24	1	comp24142_c0_seq2
Phenylalanine metabolism	10	ammonia-lyase	EC:4.3.1.25	1	comp24142_c0_seq2
Phenylalanine metabolism	10	4-monooxygenase	EC:1.14.13.11	2	comp24983_c0_seq1, comp25105_c0_seq1
Phenylalanine metabolism	10	dehydrogenase [NAD(P)+]	EC:1.2.1.5	5	comp28311_c0_seq1, comp6517_c0_seq1, comp24721_c0_seq2, comp3600_c0_seq1, comp4869_c0_seq1
Chloroalkane and chloroalkene degradation	10	dehydrogenase	EC:1.1.1.1	5	comp4089_c0_seq1, comp24789_c0_seq9, comp35420_c0_seq1, comp6721_c0_seq1, comp8141_c0_seq1
Chloroalkane and chloroalkene degradation	10	dehydrogenase (NAD+)	EC:1.2.1.3	5	comp28311_c0_seq1, comp6517_c0_seq1, comp24721_c0_seq2, comp3600_c0_seq1, comp4869_c0_seq1
Cysteine and methionine metabolism	9	decarboxylase	EC:4.1.1.50	1	comp8892_c0_seq1
Cysteine and methionine metabolism	9	transaminase	EC:2.6.1.44	2	comp22096_c0_seq9, comp18812_c0_seq1
Cysteine and methionine metabolism	9	synthase	EC:2.5.1.16	4	comp17098_c0_seq2, comp12114_c0_seq1, comp19006_c0_seq5, comp38095_c0_seq1
Cysteine and methionine metabolism	9	synthase	EC:2.5.1.22	4	comp17098_c0_seq2, comp12114_c0_seq1, comp19006_c0_seq5, comp38095_c0_seq1
Cysteine and methionine metabolism	9	oxidase	EC:1.14.17.4	2	comp9636_c0_seq2, comp17321_c0_seq1
beta-Alanine metabolism	9	dehydrogenase [NAD(P)+]	EC:1.2.1.5	5	comp28311_c0_seq1, comp6517_c0_seq1, comp24721_c0_seq2, comp3600_c0_seq1, comp4869_c0_seq1
beta-Alanine metabolism	9	dehydrogenase (NAD+)	EC:1.2.1.3	5	comp28311_c0_seq1, comp6517_c0_seq1, comp24721_c0_seq2, comp3600_c0_seq1, comp4869_c0_seq1
beta-Alanine metabolism	9	synthase	EC:2.5.1.16	4	comp17098_c0_seq2, comp12114_c0_seq1, comp19006_c0_seq5, comp38095_c0_seq1
beta-Alanine metabolism	9	synthase	EC:2.5.1.22	4	comp17098_c0_seq2, comp12114_c0_seq1, comp19006_c0_seq5, comp38095_c0_seq1
Glutathione metabolism	9	peroxidase	EC:1.11.1.9	2	comp8951_c0_seq2, comp7515_c0_seq1
Glutathione metabolism	9	synthase	EC:2.5.1.16	4	comp17098_c0_seq2, comp12114_c0_seq1, comp19006_c0_seq5, comp38095_c0_seq1
Glutathione metabolism	9	transferase	EC:2.5.1.18	1	comp8951_c0_seq2
Glutathione metabolism	9	synthase	EC:2.5.1.22	4	comp17098_c0_seq2, comp12114_c0_seq1, comp19006_c0_seq5, comp38095_c0_seq1
Glutathione metabolism	9	glutamyl transpeptidase	EC:2.3.2.2	1	comp22096_c0_seq9
Glutathione metabolism	9	dehydrogenase (NADP+)	EC:1.1.1.49	1	comp26432_c0_seq1
Glutathione metabolism	9	peroxidase	EC:1.11.1.11	1	comp17462_c0_seq1
T cell receptor signaling pathway	9	phosphatase	EC:3.1.3.16	9	comp26222_c0_seq1, comp35872_c0_seq1, comp26907_c0_seq1, comp31627_c0_seq1, comp10540_c0_seq1, comp21677_c0_seq1, comp22992_c0_seq1, comp26650_c0_seq1, comp22082_c0_seq1
Fructose and mannose metabolism	8	isomerase	EC:5.3.1.8	2	comp10144_c0_seq1, comp20316_c0_seq1
Fructose and mannose metabolism	8	aldolase	EC:4.1.2.13	1	comp2557_c0_seq2
Fructose and mannose metabolism	8	endo-1,4-beta-mannosidase	EC:3.2.1.78	3	comp18623_c0_seq1, comp18687_c0_seq1, comp22657_c0_seq2
Fructose and mannose metabolism	8	phosphohexokinase	EC:2.7.1.11	1	comp18083_c0_seq2
Fructose and mannose metabolism	8	mannose phosphomutase	EC:5.4.2.8	1	comp22008_c0_seq3
Tryptophan metabolism	8	dehydrogenase (NAD+)	EC:1.2.1.3	5	comp28311_c0_seq1, comp6517_c0_seq1, comp24721_c0_seq2, comp3600_c0_seq1, comp4869_c0_seq1
Tryptophan metabolism	8	C-acetyltransferase	EC:2.3.1.9	2	comp9466_c0_seq1, comp21547_c0_seq2
Tryptophan metabolism	8	dehydratase	EC:4.99.1.6	1	comp8871_c0_seq1
Valine, leucine and isoleucine degradation	7	synthase	EC:2.3.3.10	1	comp9466_c0_seq1
Valine, leucine and isoleucine degradation	7	dehydrogenase (NAD+)	EC:1.2.1.3	5	comp28311_c0_seq1, comp6517_c0_seq1, comp24721_c0_seq2, comp3600_c0_seq1, comp4869_c0_seq1
Valine, leucine and isoleucine degradation	7	C-acetyltransferase	EC:2.3.1.9	2	comp9466_c0_seq1, comp21547_c0_seq2
Valine, leucine and isoleucine degradation	7	C-acyltransferase	EC:2.3.1.16	2	comp9466_c0_seq1, comp21547_c0_seq2
Carotenoid biosynthesis	7	dioxygenase	EC:1.13.11.51	1	comp18864_c0_seq1
Carotenoid biosynthesis	7	dehydrogenase	EC:1.1.1.288	2	comp4089_c0_seq1, comp6721_c0_seq1
Carotenoid biosynthesis	7	acid 8'-hydroxylase	EC:1.14.13.93	3	comp30762_c0_seq1, comp19793_c0_seq2, comp24093_c0_seq20
Carotenoid biosynthesis	7	epoxidase	EC:1.14.13.90	1	comp24954_c0_seq1
Alanine, aspartate and glutamate metabolism	7	transaminase	EC:2.6.1.12	1	comp22096_c0_seq9
Alanine, aspartate and glutamate metabolism	7	ligase	EC:6.3.1.1	1	comp24551_c0_seq49
Alanine, aspartate and glutamate metabolism	7	dehydrogenase (NAD+)	EC:1.2.1.24	3	comp3600_c0_seq1, comp4869_c0_seq1, comp6517_c0_seq1
Alanine, aspartate and glutamate metabolism	7	transaminase	EC:2.6.1.2	1	comp22096_c0_seq9
Alanine, aspartate and glutamate metabolism	7	transaminase	EC:2.6.1.44	2	comp22096_c0_seq9, comp18812_c0_seq1
Alanine, aspartate and glutamate metabolism	7	synthase (glutamine-hydrolysing)	EC:6.3.5.4	1	comp24551_c0_seq49
Alanine, aspartate and glutamate metabolism	7	phosphoribosyldiphosphate 5-amidotransferase	EC:2.4.2.14	1	comp24038_c0_seq1
Carbon fixation pathways in prokaryotes	7	hydratase	EC:4.2.1.3	2	comp9636_c0_seq2, comp17321_c0_seq1
Carbon fixation pathways in prokaryotes	7	C-acetyltransferase	EC:2.3.1.9	2	comp9466_c0_seq1, comp21547_c0_seq2
Carbon fixation pathways in prokaryotes	7	ligase	EC:6.2.1.1	1	comp22059_c0_seq1
Carbon fixation pathways in prokaryotes	7	citrate synthase	EC:2.3.3.8	2	comp18893_c0_seq2, comp23529_c0_seq1
Sphingolipid metabolism	7	psychosine hydrolase	EC:3.2.1.45	2	comp9167_c0_seq1, comp3710_c0_seq1
Sphingolipid metabolism	7	melibiase	EC:3.2.1.22	4	comp21515_c0_seq1, comp40004_c0_seq1, comp23492_c0_seq3, comp24267_c0_seq7
Sphingolipid metabolism	7	beta-galactosidase	EC:3.2.1.23	1	comp23249_c0_seq1
Lysine degradation	7	dehydrogenase (NAD+)	EC:1.2.1.3	5	comp28311_c0_seq1, comp6517_c0_seq1, comp24721_c0_seq2, comp3600_c0_seq1, comp4869_c0_seq1
Lysine degradation	7	C-acetyltransferase	EC:2.3.1.9	2	comp9466_c0_seq1, comp21547_c0_seq2
Steroid hormone biosynthesis	6	dehydrogenase	EC:1.1.1.145	1	comp20354_c0_seq1
Steroid hormone biosynthesis	6	1-naphthol glucuronyltransferase	EC:2.4.1.17	5	comp4824_c0_seq1, comp8418_c0_seq1, comp11454_c0_seq1, comp29509_c0_seq1, comp2445_c0_seq1
Porphyrin and chlorophyll metabolism	6	beta-glucuronide glucuronohydrolase glucuronidase	EC:3.2.1.31	1	comp22677_c0_seq1
Porphyrin and chlorophyll metabolism	6	1-naphthol glucuronyltransferase	EC:2.4.1.17	5	comp4824_c0_seq1, comp8418_c0_seq1, comp11454_c0_seq1, comp29509_c0_seq1, comp2445_c0_seq1
Streptomycin biosynthesis	6	synthase	EC:5.5.1.4	2	comp5269_c0_seq1, comp23910_c1_seq1
Streptomycin biosynthesis	6	phosphatase	EC:3.1.3.25	4	comp1976_c0_seq1, comp16462_c0_seq1, comp8300_c0_seq1, comp20208_c0_seq2
Glycerophospholipid metabolism	6	phosphodiesterase	EC:3.1.4.46	2	comp26354_c0_seq1, comp31962_c0_seq1
Glycerophospholipid metabolism	6	phosphatase	EC:3.1.3.75	1	comp15101_c0_seq1
Glycerophospholipid metabolism	6	phospholipase D	EC:3.1.4.4	1	comp18740_c0_seq1
Glycerophospholipid metabolism	6	lecithinase B	EC:3.1.1.5	1	comp16117_c0_seq1
Glycerophospholipid metabolism	6	A1	EC:3.1.1.32	1	comp22616_c1_seq1
Stilbenoid, diarylheptanoid and gingerol biosynthesis	6	O-hydroxycinnamoyltransferase	EC:2.3.1.99	2	comp33430_c0_seq1, comp12661_c0_seq2
Stilbenoid, diarylheptanoid and gingerol biosynthesis	6	O-methyltransferase	EC:2.1.1.104	2	comp22892_c0_seq1, comp24896_c0_seq1
Stilbenoid, diarylheptanoid and gingerol biosynthesis	6	4-monooxygenase	EC:1.14.13.11	2	comp24983_c0_seq1, comp25105_c0_seq1
Stilbenoid, diarylheptanoid and gingerol biosynthesis	6	O-hydroxycinnamoyltransferase	EC:2.3.1.133	2	comp33430_c0_seq1, comp12661_c0_seq2
Butanoate metabolism	6	synthase	EC:2.3.3.10	1	comp9466_c0_seq1
Butanoate metabolism	6	dehydrogenase (NAD+)	EC:1.2.1.24	3	comp3600_c0_seq1, comp4869_c0_seq1, comp6517_c0_seq1
Butanoate metabolism	6	C-acetyltransferase	EC:2.3.1.9	2	comp9466_c0_seq1, comp21547_c0_seq2
Butanoate metabolism	6	ligase	EC:6.2.1.2	1	comp22059_c0_seq1
Arachidonic acid metabolism	5	1-monooxygenase	EC:1.14.15.3	3	comp36521_c0_seq1, comp25462_c0_seq1, comp25149_c0_seq1
Arachidonic acid metabolism	5	peroxidase	EC:1.11.1.9	2	comp8951_c0_seq2, comp7515_c0_seq1
Limonene and pinene degradation	5	dehydrogenase (NAD+)	EC:1.2.1.3	5	comp28311_c0_seq1, comp6517_c0_seq1, comp24721_c0_seq2, comp3600_c0_seq1, comp4869_c0_seq1
Methane metabolism	5	hydroxymethyltransferase	EC:2.1.2.1	1	comp20214_c0_seq2
Methane metabolism	5	aldolase	EC:4.1.2.13	1	comp2557_c0_seq2
Methane metabolism	5	phosphohexokinase	EC:2.7.1.11	1	comp18083_c0_seq2
Methane metabolism	5	ligase	EC:6.2.1.1	1	comp22059_c0_seq1
Methane metabolism	5	dehydrogenase	EC:1.1.1.284	1	comp35420_c0_seq1
Sulfur metabolism	5	nucleotidase	EC:3.1.3.7	4	comp1976_c0_seq1, comp16462_c0_seq1, comp8300_c0_seq1, comp20208_c0_seq2
Sulfur metabolism	5	kinase	EC:2.7.1.25	1	comp22385_c0_seq3
Histidine metabolism	5	dehydrogenase [NAD(P)+]	EC:1.2.1.5	5	comp28311_c0_seq1, comp6517_c0_seq1, comp24721_c0_seq2, comp3600_c0_seq1, comp4869_c0_seq1
Histidine metabolism	5	dehydrogenase (NAD+)	EC:1.2.1.3	5	comp28311_c0_seq1, comp6517_c0_seq1, comp24721_c0_seq2, comp3600_c0_seq1, comp4869_c0_seq1
Naphthalene degradation	5	dehydrogenase	EC:1.1.1.1	5	comp4089_c0_seq1, comp24789_c0_seq9, comp35420_c0_seq1, comp6721_c0_seq1, comp8141_c0_seq1
Citrate cycle (TCA cycle)	4	hydratase	EC:4.2.1.3	2	comp9636_c0_seq2, comp17321_c0_seq1
Citrate cycle (TCA cycle)	4	citrate synthase	EC:2.3.3.8	2	comp18893_c0_seq2, comp23529_c0_seq1
Caprolactam degradation	4	1-monooxygenase	EC:1.14.15.3	3	comp36521_c0_seq1, comp25462_c0_seq1, comp25149_c0_seq1
Caprolactam degradation	4	dehydrogenase (NADP+)	EC:1.2.1.4	1	comp24721_c0_seq2
Zeatin biosynthesis	4	O-beta-D-glucosyltransferase	EC:2.4.1.203	4	comp15550_c0_seq1, comp24792_c1_seq1, comp16815_c0_seq2, comp11991_c0_seq1
Zeatin biosynthesis	4	O-beta-D-glucosyltransferase	EC:2.4.1.215	4	comp15550_c0_seq1, comp24792_c1_seq1, comp16815_c0_seq2, comp11991_c0_seq1
Diterpenoid biosynthesis	4	diphosphate synthase	EC:5.5.1.13	2	comp36272_c0_seq1, comp23138_c0_seq5
Diterpenoid biosynthesis	4	2beta-dioxygenase	EC:1.14.11.13	2	comp16974_c0_seq2, comp13268_c0_seq1
Isoflavonoid biosynthesis	4	synthase	EC:1.14.11.22	4	comp23106_c0_seq1, comp9669_c0_seq1, comp38418_c0_seq1, comp9636_c0_seq2
Pyrimidine metabolism	4	kinase	EC:2.7.4.6	1	comp20161_c0_seq1
Pyrimidine metabolism	4	synthase (glutamine hydrolysing)	EC:6.3.4.2	2	comp23881_c0_seq5, comp8241_c0_seq1
Pyrimidine metabolism	4	bis(5'-nucleosyl)-tetraphosphatase (asymmetrical)	EC:3.6.1.17	1	comp18785_c0_seq1
Glycosphingolipid biosynthesis - globo series	4	melibiase	EC:3.2.1.22	4	comp21515_c0_seq1, comp40004_c0_seq1, comp23492_c0_seq3, comp24267_c0_seq7
Oxidative phosphorylation	4	ATPase	EC:3.6.3.6	2	comp2749_c0_seq1, comp13654_c0_seq2
Oxidative phosphorylation	4	dehydrogenase	EC:1.6.99.3	2	comp25043_c0_seq1, comp9765_c0_seq3
Biosynthesis of unsaturated fatty acids	3	C-acyltransferase	EC:2.3.1.16	2	comp9466_c0_seq1, comp21547_c0_seq2
Biosynthesis of unsaturated fatty acids	3	oxidase	EC:1.3.3.6	1	comp35248_c0_seq1
Nicotinate and nicotinamide metabolism	3	diphosphatase	EC:3.6.1.9	1	comp18785_c0_seq1
Nicotinate and nicotinamide metabolism	3	nucleosidase	EC:3.2.2.1	1	comp9998_c0_seq1
Nicotinate and nicotinamide metabolism	3	kinase	EC:2.7.1.23	1	comp9162_c0_seq1
Propanoate metabolism	3	C-acetyltransferase	EC:2.3.1.9	2	comp9466_c0_seq1, comp21547_c0_seq2
Propanoate metabolism	3	ligase	EC:6.2.1.1	1	comp22059_c0_seq1
Linoleic acid metabolism	3	13S-lipoxygenase	EC:1.13.11.12	3	comp24275_c0_seq1, comp15994_c0_seq1, comp23340_c0_seq2
Ubiquinone and other terpenoid-quinone biosynthesis	3	dehydrogenase (quinone)	EC:1.6.5.2	1	comp19994_c0_seq1
Ubiquinone and other terpenoid-quinone biosynthesis	3	4-monooxygenase	EC:1.14.13.11	2	comp24983_c0_seq1, comp25105_c0_seq1
Pentose phosphate pathway	3	aldolase	EC:4.1.2.13	1	comp2557_c0_seq2
Pentose phosphate pathway	3	phosphohexokinase	EC:2.7.1.11	1	comp18083_c0_seq2
Pentose phosphate pathway	3	dehydrogenase (NADP+)	EC:1.1.1.49	1	comp26432_c0_seq1
Benzoate degradation	3	C-acetyltransferase	EC:2.3.1.9	2	comp9466_c0_seq1, comp21547_c0_seq2
Benzoate degradation	3	C-acyltransferase	EC:2.3.1.16	2	comp9466_c0_seq1, comp21547_c0_seq2
Benzoate degradation	3	ligase	EC:6.2.1.25	1	comp22059_c0_seq1
Geraniol degradation	2	C-acyltransferase	EC:2.3.1.16	2	comp9466_c0_seq1, comp21547_c0_seq2
Ethylbenzene degradation	2	C-acyltransferase	EC:2.3.1.16	2	comp9466_c0_seq1, comp21547_c0_seq2
Fatty acid elongation	2	C-acyltransferase	EC:2.3.1.16	2	comp9466_c0_seq1, comp21547_c0_seq2
Carbon fixation in photosynthetic organisms	2	aldolase	EC:4.1.2.13	1	comp2557_c0_seq2
Carbon fixation in photosynthetic organisms	2	transaminase	EC:2.6.1.2	1	comp22096_c0_seq9
Glycosaminoglycan degradation	2	beta-galactosidase	EC:3.2.1.23	1	comp23249_c0_seq1
Glycosaminoglycan degradation	2	beta-glucuronide glucuronohydrolase glucuronidase	EC:3.2.1.31	1	comp22677_c0_seq1
Synthesis and degradation of ketone bodies	2	synthase	EC:2.3.3.10	1	comp9466_c0_seq1
Synthesis and degradation of ketone bodies	2	C-acetyltransferase	EC:2.3.1.9	2	comp9466_c0_seq1, comp21547_c0_seq2
Phenylalanine, tyrosine and tryptophan biosynthesis	1	dehydratase	EC:4.2.1.51	1	comp17025_c0_seq2
Phenylalanine, tyrosine and tryptophan biosynthesis	1	dehydratase	EC:4.2.1.91	1	comp17025_c0_seq2
Fatty acid biosynthesis	1	ligase	EC:6.2.1.3	1	comp23257_c0_seq2
Ether lipid metabolism	1	phospholipase D	EC:3.1.4.4	1	comp18740_c0_seq1
Arginine biosynthesis	1	transaminase	EC:2.6.1.2	1	comp22096_c0_seq9
Pantothenate and CoA biosynthesis	1	diphosphatase	EC:3.6.1.9	1	comp18785_c0_seq1
Glycosphingolipid biosynthesis - ganglio series	1	beta-galactosidase	EC:3.2.1.23	1	comp23249_c0_seq1
Folate biosynthesis	1	hydrolase	EC:3.4.19.9	1	comp16719_c0_seq1
One carbon pool by folate	1	hydroxymethyltransferase	EC:2.1.2.1	1	comp20214_c0_seq2
Steroid degradation	1	dehydrogenase	EC:1.1.1.145	1	comp20354_c0_seq1
Taurine and hypotaurine metabolism	1	glutamyl transpeptidase	EC:2.3.2.2	1	comp22096_c0_seq9
Nitrogen metabolism	1	dehydratase	EC:4.2.1.1	1	comp20432_c0_seq1

## Sheet: Table S5
Table S5. The 1428 differentially expressed genes in different clusters and their annotation.
		Log10(RPKM)
Cluster group #	Sequence ID	SW-1	SW-2	TZ	Sequence Description	Sequence Length	Blast E-Value	Blast Top Hit Description from TAIR 10.1	Blast Top Hit Gene Name	GO Accession
1	comp11027_c0_seq2	0.904668	1.4761	1.5928	argonaute 1	485	2e-33	gi|30694320|ref|NP_849784.1|protein argonaute 1 [Arabidopsis thaliana]	AGO1	GO:0005634, GO:0005829, GO:0019898, GO:0003743, GO:0004521, GO:0005515, GO:0035197, GO:0035198, GO:0009733, GO:0009793, GO:0009814, GO:0009850, GO:0009955, GO:0009965, GO:0010218, GO:0010305, GO:0010586, GO:0010589, GO:0016246, GO:0035019, GO:0035195, GO:0048830, GO:0048864, GO:0060145, GO:0090502, GO:1902183, GO:0005840, GO:0006446, GO:0051252
1	comp13191_c0_seq1	0.748736	1.43909	1.48935	potassium transporter 2	536	7.3e-24	gi|22330543|ref|NP_177187.2|potassium transporter 6 [Arabidopsis thaliana]	KUP6	GO:0005739, GO:0005774, GO:0005242, GO:0009674, GO:0030551, GO:0042802, GO:0009414, GO:0009651, GO:0009932, GO:0010107, GO:0048767, GO:0090333, GO:0008076
1	comp14195_c0_seq1	0.229479	1.17427	1.11393	---NA---	352
1	comp16364_c0_seq1	0.530496	1.28447	1.4173	---NA---	601
1	comp17780_c0_seq1	0.373461	2.02841	1.9127	dehydration-responsive RD22	699	1.6e-26	gi|15239478|ref|NP_197943.1|dehydration-responsive protein RD22 [Arabidopsis thaliana]	RD22	GO:0000326, GO:0005768, GO:0005802, GO:0009269, GO:0009651, GO:0009737, GO:0048316
1	comp20243_c0_seq1	0.604311	1.45509	1.50441	cysteine-rich receptor kinase 6	516	5.4e-38	gi|30686073|ref|NP_194046.2|cysteine-rich receptor-like protein kinase 7 [Arabidopsis thaliana]	CRK7	GO:0005739, GO:0005773, GO:0005886, GO:0009506, GO:0009507, GO:0004674, GO:0005516, GO:0005524, GO:0031625, GO:0000302, GO:0009737, GO:0009816, GO:0012501, GO:0046777, GO:0071446, GO:0009069
1	comp21534_c0_seq1	1.27216	1.86887	1.93206	potassium transporter 2	2382	0	gi|18405433|ref|NP_565936.1|potassium transporter 2 [Arabidopsis thaliana], gi|145330713|ref|NP_001078032.1|potassium transporter 2 [Arabidopsis thaliana]	KT2	GO:0000325, GO:0005634, GO:0005739, GO:0005774, GO:0009507, GO:0004016, GO:0005242, GO:0009674, GO:0030551, GO:0042802, GO:0009414, GO:0009555, GO:0009651, GO:0009932, GO:0010107, GO:0048767, GO:0090333, GO:0006144, GO:0006171, GO:0008076
1	comp28974_c0_seq1	0.732949	1.52398	1.55297	---NA---	254				GO:0016758, GO:0008152
1	comp30210_c0_seq1	0.759276	1.59382	1.58337	---NA---	241
1	comp30386_c0_seq1	0.40896	1.26383	1.37746	---NA---	551
1	comp33132_c0_seq1	0.133296	1.02384	1.12989	HXXXD-type acyl-transferase family	271	5.9e-47	gi|30693725|ref|NP_568587.2|omega-hydroxypalmitate O-feruloyl transferase [Arabidopsis thaliana]	AT5G41040	GO:0005829, GO:0016410, GO:0050737, GO:0090430, GO:0010143, GO:0010345, GO:0033494, GO:0052325, GO:0065007, GO:0090431, GO:0042967
1	comp34692_c0_seq1	0.214393	1.90975	1.84152	dehydration-responsive RD22	241	2.4e-19	gi|15239478|ref|NP_197943.1|dehydration-responsive protein RD22 [Arabidopsis thaliana]	RD22	GO:0000326, GO:0005768, GO:0005802, GO:0045735, GO:0009269, GO:0009651, GO:0009737, GO:0048316
1	comp35070_c0_seq1	0.247777	1.23574	1.3752	---NA---	218
2	comp11750_c0_seq1	0.632176	1.09976	1.40249	---NA---	359
2	comp12171_c0_seq1	0.680377	1.2759	1.56086	---NA---	678
2	comp15357_c0_seq1	0.867033	1.57151	1.74342	---NA---	570
2	comp15985_c0_seq1	0.930514	1.67312	1.97971	BEL1-like homeodomain 4	584	9.8e-16	gi|15238073|ref|NP_198957.1|homeobox protein BEL1 [Arabidopsis thaliana]	BEL1	GO:0005576, GO:0005634, GO:0005829, GO:0009506, GO:0003700, GO:0005515, GO:0042626, GO:0043565, GO:0044212, GO:0008285, GO:0009640, GO:0009965, GO:0010051, GO:0010076, GO:0010077, GO:0010089, GO:0010154, GO:0010223, GO:0010227, GO:0010228, GO:0010229, GO:0010371, GO:0045892, GO:0048457, GO:0048481, GO:0048510, GO:0080006, GO:0090470, GO:0005667, GO:0045449, GO:0006810
2	comp17106_c0_seq1	1.54839	2.07213	2.26802	plastid movement impaired 2	1239	5.1e-12	gi|30677912|ref|NP_178243.2|uncharacterized protein [Arabidopsis thaliana]	At17.1	GO:0044464, GO:0050896
2	comp17395_c0_seq1	0.196399	1.22436	1.43266	---NA---	364
2	comp22115_c0_seq3	1.32929	1.77796	2.01731	---NA---	869
2	comp24551_c0_seq49	1.20379	2.10872	2.44253	asparagine synthetase [glutamine-hydrolyzing]	2306	6.1e-176	gi|79327530|ref|NP_001031864.1|asparagine synthetase 3 [Arabidopsis thaliana]	ASN3	GO:0005829, GO:0009506, GO:0004066, GO:0004071, GO:0042803, GO:0006529, GO:0006541, GO:0009063, GO:0009646, GO:0009744, GO:0009749, GO:0009750, GO:0042538, GO:0043617, GO:0097164, GO:0006522, GO:0006531
2	comp26754_c0_seq1	0.484692	1.38275	1.60889	---NA---	434
2	comp27142_c0_seq1	0.596574	1.0122	1.30568	---NA---	363
2	comp27808_c0_seq1	0.396491	1.10788	1.38804	---NA---	280
2	comp27880_c0_seq1	0.521498	1.05182	1.28177	---NA---	349
2	comp28092_c0_seq1	0.476141	1.03441	1.33675	serine threonine- kinase BRI1-like 1	295	3.1e-27	gi|15240747|ref|NP_196345.1|leucine-rich repeat receptor protein kinase EMS1 [Arabidopsis thaliana]	EMS1	GO:0005634, GO:0005739, GO:0005768, GO:0005777, GO:0005886, GO:0009507, GO:0043234, GO:0001653, GO:0004383, GO:0004674, GO:0005496, GO:0005524, GO:0019199, GO:0042803, GO:0046982, GO:0006468, GO:0009409, GO:0009414, GO:0009556, GO:0009611, GO:0009651, GO:0009729, GO:0009738, GO:0009742, GO:0009826, GO:0009911, GO:0009942, GO:0009945, GO:0010051, GO:0010224, GO:0010234, GO:0010268, GO:0010584, GO:…
2	comp283_c0_seq1	0.211369	0.856036	1.14726	metal-nicotianamine transporter YSL6	251	4.6e-30	gi|18405202|ref|NP_566806.1|putative metal-nicotianamine transporter YSL6 [Arabidopsis thaliana]	YSL6	GO:0005774, GO:0005886, GO:0009507, GO:0015198, GO:0051980, GO:0006826, GO:0006857, GO:0009624, GO:0010039, GO:0010043, GO:0048316, GO:0055085
2	comp28603_c0_seq1	0.475588	1.38882	1.59848	MYB transcription factor	425	8.1e-56	gi|18395645|ref|NP_564230.1|putative transcription factor (MYB116) [Arabidopsis thaliana]	MYB116	GO:0005634, GO:0090406, GO:0001046, GO:0003700, GO:0005516, GO:0006952, GO:0009414, GO:0009555, GO:0009620, GO:0009651, GO:0009686, GO:0009723, GO:0009733, GO:0009740, GO:0009751, GO:0009789, GO:0009867, GO:0010091, GO:0010200, GO:0016036, GO:0043068, GO:0045893, GO:0046686, GO:0048629, GO:0048765, GO:0080086, GO:0005667, GO:0045449
2	comp33415_c0_seq1	-0.0813912	1.10625	1.36452	---NA---	216
2	comp3361_c0_seq1	0.281918	0.890025	1.20881	---NA---	533
2	comp34002_c0_seq1	0.284087	0.987161	1.15558	---NA---	233
2	comp34427_c0_seq1	0.119519	0.950662	1.25855	---NA---	267
2	comp3500_c0_seq1	0.717266	1.20488	1.50817	---NA---	548
2	comp37343_c0_seq1	0.0990294	0.937778	1.1251	outer envelope pore 16-2	305	8.1e-12	gi|18414605|ref|NP_567488.1|outer envelope pore protein 16-2 [Arabidopsis thaliana]	ATOEP16-2	GO:0031359, GO:0015171, GO:0015031, GO:0006865
2	comp3753_c0_seq1	0.703167	1.78498	1.97926	pathogenesis-related thaumatin	756	1.6e-28	gi|15221033|ref|NP_173261.1|Thaumatin-like protein [Arabidopsis thaliana]	ATLP-1	GO:0016020, GO:0050896
2	comp38166_c0_seq1	0.210858	0.80281	1.1318	sodium hydrogen exchanger 8	300	3.2e-26	gi|145335704|ref|NP_172918.2|sodium/hydrogen exchanger 8 [Arabidopsis thaliana]	NHX8	GO:0005886, GO:0009941, GO:0016021, GO:0005515, GO:0010348, GO:0015081, GO:0006814, GO:0009651, GO:0010163, GO:0010352, GO:0042542, GO:1902600, GO:2000377
2	comp39351_c0_seq1	-0.212676	0.861901	1.24846	---NA---	314
2	comp39828_c0_seq1	-0.293864	1.25112	1.62023	---NA---	238
2	comp7794_c0_seq1	0.273451	1.02586	1.38506	---NA---	338				GO:0003950
3	comp10144_c0_seq1	0.48535	0.987914	1.90491	mannose-6-phosphate isomerase	361	4.3e-19	gi|15232927|ref|NP_186906.1|mannose-6-phosphate isomerase [Arabidopsis thaliana]	MEE31	GO:0004476, GO:0008270, GO:0009298, GO:0009646, GO:0009744, GO:0009793, GO:0010043, GO:0019853, GO:0032025, GO:0033591, GO:0046680, GO:0046686, GO:0006000, GO:0006013
3	comp10165_c0_seq1	0.510122	0.993792	1.53979	major facilitator	620	3.9e-35	gi|18423161|ref|NP_568730.1|major facilitator protein [Arabidopsis thaliana], gi|18423171|ref|NP_568735.1|major facilitator protein [Arabidopsis thaliana]	AT5G50520, AT5G50630	GO:0005774, GO:0005886, GO:0009506, GO:0006996, GO:0050832, GO:0080167
3	comp10509_c0_seq2	0.507253	0.737814	1.31547	lipid phosphate phosphatase epsilon 2	507	8.5e-18	gi|145334923|ref|NP_001078807.1|lipid phosphate phosphatase epsilon 2 [Arabidopsis thaliana]	AT5G66450
3	comp10540_c0_seq1	0.323785	0.510591	1.50418	calcineurin B 10	579	5.1e-65	gi|15237928|ref|NP_197815.1|calcineurin B-like protein 4 [Arabidopsis thaliana]	SOS3	GO:0005886, GO:0005955, GO:0009507, GO:0009705, GO:0022626, GO:0090406, GO:0004723, GO:0005509, GO:0019900, GO:0005513, GO:0009409, GO:0009414, GO:0009738, GO:0009860, GO:0010107, GO:0010118, GO:0019722, GO:0030007, GO:0042538, GO:0042539, GO:0043266, GO:2000021, GO:0006470
3	comp10599_c0_seq1	0.804851	0.830706	2.25041	WRKY DNA-binding 18	680	4.7e-47	gi|15233516|ref|NP_192354.1|putative WRKY transcription factor 42 [Arabidopsis thaliana]	WRKY42	GO:0005634, GO:0001046, GO:0003700, GO:0008270, GO:0042802, GO:0000122, GO:0002237, GO:0009409, GO:0009414, GO:0009555, GO:0009611, GO:0009651, GO:0009723, GO:0009753, GO:0009863, GO:0009942, GO:0010055, GO:0010120, GO:0010200, GO:0010508, GO:0016036, GO:0030010, GO:0032107, GO:0043620, GO:0045893, GO:0048527, GO:0050691, GO:0070370, GO:0080169, GO:1900150, GO:1900425, GO:0005667, GO:0045449
3	comp10846_c0_seq1	0.200446	0.109062	2.99469	chalcone synthase	229	5.9e-45	gi|15240753|ref|NP_196897.1|chalcone synthase [Arabidopsis thaliana]	TT4	GO:0005634, GO:0005783, GO:0009705, GO:0005515, GO:0016210, GO:0090439, GO:0006979, GO:0009611, GO:0009629, GO:0009715, GO:0009733, GO:0009753, GO:0009926, GO:0010224, GO:0030639, GO:0031540, GO:0080110
3	comp10988_c0_seq1	0.341257	0.860949	1.6404	probable peptide nitrate transporter	501	7.6e-35	gi|18409382|ref|NP_564978.1|nitrate transporter 1:2 [Arabidopsis thaliana]	NRT1:2	GO:0005886, GO:0009506, GO:0005509, GO:0005515, GO:0015112, GO:0042936, GO:0042937, GO:0090440, GO:0006807, GO:0009414, GO:0009611, GO:0009624, GO:0009737, GO:0009751, GO:0009753, GO:0010119, GO:0010167, GO:0015706, GO:0042538, GO:0042742, GO:0042938, GO:0042939, GO:0043201, GO:0080052, GO:0080053, GO:0080168, GO:0098656
3	comp11224_c0_seq1	0.781285	1.02086	1.59594	---NA---	338
3	comp11386_c0_seq1	0.853485	1.31696	1.76422	---NA---	217
3	comp11425_c0_seq1	0.423366	0.687998	1.30019	brassinazole-resistant 2	592	2.9e-25	gi|15234055|ref|NP_193624.1|BES1/BZR1-like protein 3 [Arabidopsis thaliana]	BEH3	GO:0005634, GO:0005773, GO:0005829, GO:0001046, GO:0003700, GO:0005515, GO:0016161, GO:0009742, GO:0042742, GO:0045892, GO:0048316, GO:0048481, GO:0048831, GO:0005667, GO:0045449, GO:0000272, GO:0005982, GO:0005985
3	comp11454_c0_seq1	0.490101	0.708124	1.19526	core-2 I-branching beta-1,6-N-acetylglucosaminyltransferase family	1033	7.5e-75	gi|15242199|ref|NP_197009.1|core-2/I-branching beta-1,6-N-acetylglucosaminyltransferase family protein [Arabidopsis thaliana]	AT5G15050	GO:0005634, GO:0005794, GO:0016020, GO:0008375, GO:0015020, GO:0009567, GO:0016049, GO:0016051, GO:0048868
3	comp11461_c0_seq1	0.461752	0.640151	1.38176	transcriptional activator DEMETER	298	1.8e-34	gi|145334291|ref|NP_001078527.1|transcriptional activator DEMETER [Arabidopsis thaliana]	DME	GO:0005730, GO:0043078, GO:0003906, GO:0005515, GO:0019104, GO:0006306, GO:0006349, GO:0009793, GO:0010216, GO:0031936, GO:0080111, GO:0090305, GO:0006284
3	comp11514_c0_seq2	0.195753	0.693982	1.27157	---NA---	319
3	comp11668_c0_seq2	0.979992	1.08581	1.69061	cytochrome P450, family 709, subfamily B, polypeptide 1	433	2.5e-31	gi|15225777|ref|NP_180239.1|cytochrome P450 734A1 [Arabidopsis thaliana]	BAS1	GO:0005783, GO:0005506, GO:0008395, GO:0016705, GO:0019825, GO:0020037, GO:0090411, GO:0007623, GO:0009416, GO:0009651, GO:0009741, GO:0009826, GO:0010268, GO:0016131, GO:0055114
3	comp11795_c0_seq2	0.153203	0.535421	2.24869	Glucose-methanol-choline (GMC) oxidoreductase family	229	8e-25	gi|15242236|ref|NP_200008.1|Glucose-methanol-choline (GMC) oxidoreductase family protein [Arabidopsis thaliana]	AT5G51950	GO:0005576, GO:0005634, GO:0009507, GO:0016614, GO:0046593, GO:0050660, GO:0006952, GO:0007267, GO:0009553, GO:0010430, GO:0046202
3	comp11940_c0_seq1	0.50422	0.699159	1.21415	leucine-rich repeat transmembrane kinase	691	1.2e-115	gi|18398327|ref|NP_566341.1|protein kinase [Arabidopsis thaliana]	AT3G09010	GO:0005773, GO:0005886, GO:0009506, GO:0004674, GO:0005515, GO:0005524, GO:0000302, GO:0006952, GO:0007169, GO:0007623, GO:0009737, GO:0046777, GO:0009069
3	comp11973_c0_seq1	1.56316	1.69784	2.40961	cytochrome P450, family 709, subfamily B, polypeptide 1	448	7.2e-55	gi|15231906|ref|NP_188086.1|cytochrome P450, family 72, subfamily A, polypeptide 14 [Arabidopsis thaliana]	CYP72A14	GO:0005739, GO:0005783, GO:0009506, GO:0009507, GO:0005506, GO:0008395, GO:0016705, GO:0019825, GO:0020037, GO:0090411, GO:0007623, GO:0009416, GO:0009651, GO:0009741, GO:0009826, GO:0010268, GO:0016131, GO:0033466, GO:0055114
3	comp11991_c0_seq1	0.635964	0.667344	1.50558	UDP-glucosyl transferase 85A2	311	3.8e-17	gi|15218268|ref|NP_177950.1|UDP-glucosyl transferase 85A4 [Arabidopsis thaliana]	UGT85A4	GO:0005737, GO:0050284, GO:0050403, GO:0050502, GO:0009718, GO:0009801, GO:0080167
3	comp12107_c0_seq2	0.674089	1.27138	1.73738	SPX domain-containing 1	1159	3.1e-61	gi|15241275|ref|NP_197515.1|SPX domain-containing protein 1 [Arabidopsis thaliana]	SPX1	GO:0005634, GO:0005783, GO:0080040
3	comp12114_c0_seq1	-0.0834824	0.802716	1.64212	Spermine synthase	358	9.6e-60	gi|145362282|ref|NP_973900.2|spermidine synthase 1 [Arabidopsis thaliana]	SPDS1	GO:0005634, GO:0005829, GO:0005886, GO:0009507, GO:0004766, GO:0005515, GO:0010487, GO:0016768, GO:0008295, GO:0009826, GO:0009926, GO:0042742, GO:0048759, GO:0006525, GO:0006560, GO:0019482
3	comp12347_c0_seq1	0.546404	-0.251404	2.96366	chalcone synthase	304	1.7e-30	gi|15240753|ref|NP_196897.1|chalcone synthase [Arabidopsis thaliana]	TT4	GO:0005634, GO:0005783, GO:0009705, GO:0005515, GO:0016210, GO:0006979, GO:0009611, GO:0009629, GO:0009715, GO:0009733, GO:0009753, GO:0009926, GO:0010224, GO:0031540
3	comp12437_c0_seq1	0.916935	1.27624	2.24999	ACT domain-containing 3	831	8e-31	gi|42572033|ref|NP_974107.1|ACT domain-containing protein [Arabidopsis thaliana]	ACR4	GO:0005829, GO:0005886, GO:0009507, GO:0009986, GO:0030139, GO:0016597, GO:0019199, GO:0042803, GO:0006521, GO:0009735, GO:0009737, GO:0009786, GO:0009793, GO:0010311, GO:0048829, GO:0007165
3	comp12547_c0_seq2	0.348719	0.277102	1.76649	GDSL esterase lipase	556	7.6e-19	gi|15242811|ref|NP_195981.1|GDSL esterase/lipase [Arabidopsis thaliana]	AT5G03610	GO:0009725, GO:0045087, GO:0098542
3	comp12737_c0_seq1	0.843311	1.01562	1.71463	transcriptional activator DEMETER	1268	1.9e-96	gi|30680560|ref|NP_196076.2|transcriptional activator DEMETER [Arabidopsis thaliana]	DME	GO:0043078, GO:0003906, GO:0005515, GO:0019104, GO:0006306, GO:0006349, GO:0009793, GO:0010216, GO:0031936, GO:0080111, GO:0090305, GO:0006284
3	comp12851_c0_seq1	0.31283	0.850239	1.2487	---NA---	696
3	comp12928_c0_seq1	0.0503555	0.573161	1.70871	---NA---	345
3	comp13238_c0_seq1	0.415223	0.565034	1.82288	calcium-dependent phosphotriesterase superfamily	238	9.8e-24	gi|18398204|ref|NP_565392.1|uncharacterized protein [Arabidopsis thaliana]	AT2G16760	GO:0005576, GO:0005783
3	comp13268_c0_seq1	0.830709	1.13547	1.64177	oxidoreductase, 2OG-Fe(II) oxygenase family	1130	6.7e-72	gi|145340471|ref|NP_193852.2|gibberellin 2-beta-dioxygenase 8 [Arabidopsis thaliana]	GA2OX8	GO:0005506, GO:0052634, GO:0052635, GO:0009628, GO:0009685, GO:0044249, GO:0048731, GO:0055114, GO:0071229, GO:0071396, GO:1901576, GO:1901701
3	comp13372_c0_seq1	0.539304	0.559535	1.52561	uncharacterized protein	537	8.2e-76	gi|79497780|ref|NP_195420.2|uncharacterized protein [Arabidopsis thaliana]	AT4G37030	GO:0005576, GO:0005886, GO:0009507, GO:0016021, GO:0010228
3	comp13443_c0_seq1	0.473421	0.850003	1.6137	---NA---	212
3	comp13654_c0_seq2	0.756621	1.18715	1.81728	H(+)-ATPase 11	1672	0	gi|15241907|ref|NP_201073.1|H(+)-ATPase 11 [Arabidopsis thaliana]	HA11	GO:0005634, GO:0005794, GO:0005829, GO:0005887, GO:0009506, GO:0009507, GO:0009705, GO:0000287, GO:0005515, GO:0008553, GO:0007033, GO:0007035, GO:0009414, GO:0009651, GO:0009737, GO:0010023, GO:0010119, GO:0010214, GO:0015991, GO:0055065, GO:0006119
3	comp13768_c0_seq1	0.866248	1.21798	1.77547	plastidic glucose transporter	1279	4.1e-117	gi|30689342|ref|NP_850393.1|inositol transporter 1 [Arabidopsis thaliana]	INT1	GO:0005886, GO:0009705, GO:0009941, GO:0016021, GO:0090406, GO:0005355, GO:0005366, GO:0009679, GO:0015146, GO:0001101, GO:0006950, GO:0009628, GO:0015798, GO:0023052, GO:0048582, GO:0098655, GO:1901700, GO:0015758, GO:0015750
3	comp13856_c0_seq1	1.17324	1.83907	2.30307	O-glycosyl hydrolases family 17	1054	5.2e-69	gi|15229514|ref|NP_189019.1|O-glycosyl hydrolases family 17 protein [Arabidopsis thaliana]	AT3G23770	GO:0005634, GO:0005783, GO:0009505, GO:0009506, GO:0046658, GO:0042973, GO:0007154, GO:0009793, GO:0010584, GO:0005982, GO:0005985
3	comp14070_c0_seq1	0.345431	0.497619	1.24396	nitrate transporter	308	2e-45	gi|15223123|ref|NP_172288.1|nitrate transporter 2:1 [Arabidopsis thaliana]	NRT2:1	GO:0005886, GO:0009507, GO:0009705, GO:0015112, GO:0015706, GO:0048527, GO:0071249, GO:0080167, GO:0098656
3	comp14122_c0_seq1	1.67457	1.67605	2.64912	Nuclear transport factor 2 (NTF2) family	917	1.4e-71	gi|18414706|ref|NP_568142.1|Nuclear transport factor 2 (NTF2) family protein [Arabidopsis thaliana], gi|30680652|ref|NP_850766.1|Nuclear transport factor 2 (NTF2) family protein [Arabidopsis thaliana]	AT5G04830	GO:0005634, GO:0005886
3	comp14157_c0_seq2	0.122431	0.279114	1.26315	uncharacterized protein	398	5.3e-19	gi|79497780|ref|NP_195420.2|uncharacterized protein [Arabidopsis thaliana]	AT4G37030	GO:0005886
3	comp14580_c0_seq1	1.35428	1.40492	2.04231	uncharacterized protein	1696	1.2e-135	gi|15221185|ref|NP_175278.1|uncharacterized protein [Arabidopsis thaliana]	AT1G48450	GO:0005634, GO:0009570, GO:0009611, GO:0010193, GO:0010224
3	comp14630_c0_seq1	0.806763	0.863927	2.20527	sec fourteen -20	318	2.2e-11	gi|15223439|ref|NP_171669.1|protein sec fourteen-like protein-20 [Arabidopsis thaliana]	AT1G01630	GO:0005634, GO:0005215, GO:0006810
3	comp14764_c0_seq1	0.27837	0.504549	1.37811	receptor like 13	351	7.5e-18	gi|186495296|ref|NP_177557.2|receptor like protein 13 [Arabidopsis thaliana]	RLP13	GO:0005768, GO:0005886, GO:0009507, GO:0043234, GO:0000166, GO:0001653, GO:0004674, GO:0004888, GO:0005496, GO:0042803, GO:0046982, GO:0006468, GO:0009611, GO:0009620, GO:0009650, GO:0009729, GO:0009734, GO:0009742, GO:0009826, GO:0009911, GO:0010224, GO:0010233, GO:0010268, GO:0010305, GO:0010584, GO:0031347, GO:0042493, GO:0045087, GO:0045851, GO:0048366, GO:0048657, GO:0060548, GO:1900140, GO:…
3	comp1504_c0_seq1	0.480219	1.08367	1.54088	calcium-binding CML27	1532	1.3e-48	gi|15221781|ref|NP_173866.1|putative calcium-binding protein CML25 [Arabidopsis thaliana]	AT1G24620	GO:0005634, GO:0005739, GO:0005774, GO:0005777, GO:0005794, GO:0005886, GO:0004871, GO:0005509, GO:0005515, GO:0009408, GO:0009409, GO:0009567, GO:0009612, GO:0009646, GO:0009733, GO:0009737, GO:0009739, GO:0009846, GO:0009909, GO:0009961, GO:0010099, GO:0019722, GO:0030163, GO:0042542, GO:0045087, GO:0048574, GO:0048767, GO:0051592, GO:0080164
3	comp15228_c0_seq1	1.11326	1.25325	1.78754	ARM repeat superfamily	741	1.5e-27	gi|15235456|ref|NP_193007.1|ARM repeat protein [Arabidopsis thaliana]	AT4G12710	GO:0005634, GO:0005829, GO:0009507, GO:0004842, GO:0070696, GO:0010200, GO:0016567, GO:0042742
3	comp15268_c0_seq1	0.728247	0.979395	1.50155	galactan synthase 1	813	1.9e-54	gi|18403319|ref|NP_565768.1|galactan synthase 1 [Arabidopsis thaliana]	AT2G33570	GO:0005794, GO:0048531, GO:0042546, GO:0045489
3	comp15330_c0_seq1	1.08041	1.60411	2.15753	---NA---	239
3	comp15384_c0_seq1	1.02776	1.52057	2.04812	bifunctional inhibitor lipid-transfer seed storage 2S albumin superfamily	378	4.8e-11	gi|145334215|ref|NP_001078488.1|bifunctional inhibitor/lipid-transfer protein/seed storage 2S albumin superfamily protein [Arabidopsis thaliana]	AT4G33550
3	comp15466_c0_seq1	0.465052	0.848999	1.29578	phospholipid-transporting ATPase 1	577	5.1e-49	gi|18414733|ref|NP_568146.1|phospholipid-transporting ATPase 1 [Arabidopsis thaliana]	ALA1	GO:0005789, GO:0005886, GO:0009941, GO:0016021, GO:0000287, GO:0004012, GO:0005515, GO:0005524, GO:0015662, GO:0006812, GO:0015917
3	comp15547_c0_seq1	1.06653	1.84293	2.44502	---NA---	787
3	comp15698_c0_seq1	1.37686	1.90772	2.6277	Rossmann-fold NAD(P)-binding domain-containing	1358	8e-118	gi|15233666|ref|NP_194136.1|NAD(P)-binding Rossmann-fold superfamily protein [Arabidopsis thaliana]	AT4G24050	GO:0005634, GO:0005783, GO:0005886, GO:0009706, GO:0016491, GO:0007275, GO:0009860, GO:0010073
3	comp15710_c0_seq1	0.839561	1.45448	2.40422	---NA---	354
3	comp15755_c0_seq1	0.720845	0.871925	1.54917	uncharacterized protein	616	3.3e-41	gi|30695170|ref|NP_199549.2|uncharacterized protein [Arabidopsis thaliana]	AT5G47380	GO:0005634, GO:0005773
3	comp15957_c0_seq1	0.714903	1.52093	1.91889	---NA---	564
3	comp16039_c0_seq1	0.829353	1.03283	1.52003	MATE efflux family	423	6e-46	gi|42562670|ref|NP_564588.2|MATE efflux family protein [Arabidopsis thaliana]	AT1G51340	GO:0005886, GO:0015137, GO:0015238, GO:0015297, GO:0046873, GO:0006855, GO:0006879, GO:0009737, GO:0010044, GO:0015746, GO:0030001, GO:0071281, GO:0071369, GO:0071732
3	comp16096_c0_seq1	0.980057	1.05382	1.93201	pyruvate kinase	1832	0	gi|15237303|ref|NP_200104.1|plastidial pyruvate kinase 2 [Arabidopsis thaliana]	PKP-BETA1	GO:0005739, GO:0005829, GO:0009570, GO:0016020, GO:0000287, GO:0004743, GO:0016301, GO:0030955, GO:0006096, GO:0006633, GO:0010431, GO:0046686, GO:0006094, GO:0006144, GO:0015976
3	comp16117_c0_seq1	0.851216	0.954821	1.54428	alpha beta-Hydrolases superfamily	1226	2.4e-166	gi|18417885|ref|NP_568327.1|hydrolase, alpha/beta fold family protein [Arabidopsis thaliana]	AT5G16120	GO:0005794, GO:0005886, GO:0009506, GO:0003846, GO:0004622, GO:0090430, GO:0010043, GO:0042542, GO:0046686, GO:0042967, GO:0046486, GO:0009395
3	comp16134_c0_seq1	0.648175	0.716422	1.55619	---NA---	639
3	comp16306_c0_seq1	0.688015	1.11991	1.68591	uncharacterized protein	734	4.1e-36	gi|145338396|ref|NP_187801.3|uncharacterized protein [Arabidopsis thaliana]	AT3G11950	GO:0009941
3	comp16408_c0_seq1	1.35209	1.46824	2.52087	alcohol dehydrogenase	1426	1.3e-152	gi|15239063|ref|NP_199094.1|dihydroflavonol-4-reductase [Arabidopsis thaliana]	DFR	GO:0005769, GO:0005802, GO:0005829, GO:0005886, GO:0009506, GO:0042406, GO:0005085, GO:0005515, GO:0033729, GO:0045552, GO:0050662, GO:0009408, GO:0009414, GO:0009646, GO:0009718, GO:0009737, GO:0009964, GO:0010422, GO:0016192, GO:0040007, GO:0042742, GO:0045087, GO:0046686, GO:0043087
3	comp16433_c0_seq1	0.957072	1.11617	2.0528	---NA---	826
3	comp1646_c0_seq1	0.799106	1.00569	1.5055	beta-glucosidase-like SFR2	752	2.8e-45	gi|186509843|ref|NP_001118591.1|beta-glucosidase-like SFR2 [Arabidopsis thaliana]	SFR2	GO:0009707, GO:0008378, GO:0080079, GO:0005975, GO:0050826
[truncated: 1,331 more rows]

## Sheet: Table S6
Table S6. DEGs in specific gene groups*.
Terpenoid pathway		Log10 (RPKM)			RPKM			Fold Change
Sequence ID	Sequence Description	SW-1	SW-2	TZ	SW1	SW-2	TZ	TZ/SW-1	TZ/SW-2
[truncated: 114 more rows]

## Sheet: Table S7
Table S7. Primers used for qRT-PCR validation.
[truncated: 31 more rows]
